# Supplementary material
Source: PubMed Central journal article supplement (PMC6526374)

## Table of Contents

|                                                                                                                                            |             |
|--------------------------------------------------------------------------------------------------------------------------------------------|-------------|
| <b>General Considerations</b>                                                                                                              | <b>S2</b>   |
| Comments regarding origins of starting materials, purification of solvents, and spectroscopic techniques.                                  |             |
| <b>Reaction Optimization</b>                                                                                                               | <b>S5</b>   |
| Benchtop screening and results from the high-throughput experimentation center.                                                            |             |
| <b>Control Studies with Lewis Acids</b>                                                                                                    | <b>S7</b>   |
| <b>General Procedure for Photoredox/Ni Alkylation of Vinyl Epoxides</b>                                                                    | <b>S9</b>   |
| General procedure for the photoredox/nickel dual catalyzed coupling of vinyl epoxides with alkyltrifluoroborates and 1,4-dihydropyridines. |             |
| <b>General Procedure for Photoredox/Ni Alkylation of Allyl Bromides</b>                                                                    | <b>S26</b>  |
| General procedure for the photoredox/nickel dual catalyzed coupling of allyl bromides with 1,4-dihydropyridines.                           |             |
| <b>Computational Studies</b>                                                                                                               | <b>S30</b>  |
| <b><sup>1</sup>H and <sup>13</sup>C Spectra</b>                                                                                            | <b>S164</b> |

## General Considerations

NMR Spectra ( $^1\text{H}$ ,  $^{13}\text{C}$ ,  $^{19}\text{F}$ ) were performed at 298 K.  $^1\text{H}$  NMR spectra were referenced to residual non-deuterated chloroform ( $\delta$  7.26) in  $\text{CDCl}_3$ , residual  $\text{DMSO-}d_5$  ( $\delta$  2.50 ppm) in  $\text{DMSO-}d_6$ , acetone- $d_5$  ( $\delta$  2.09 ppm) in acetone- $d_6$ , and residual  $\text{MeCN-}d_2$  ( $\delta$  1.94 ppm) in  $\text{MeCN-}d_3$ .  $^{13}\text{C}$  NMR spectra were referenced to  $\text{CDCl}_3$  ( $\delta$  77.2 ppm) and  $\text{DMSO-}d_6$  ( $\delta$  39.5 ppm). Data is presented as follows: chemical shift (ppm), multiplicity (s = singlet, d = doublet, t = triplet, q = quartet, m = multiplet), coupling constant  $J$  (Hz), and integration.

Reactions were monitored by HPLC, GC/MS,  $^1\text{H}$  NMR, and/or by TLC on silica gel plates (60 Å porosity, 250  $\mu\text{m}$  thickness). TLC analysis was performed using hexanes/EtOAc as the eluent and visualized using UV light. Silica plugs utilized flash silica gel (60 Å porosity, 32–63  $\mu\text{m}$ ). Flash chromatography was accomplished using an automated system (visualizing at 254 nm, monitoring at 280 nm) with silica cartridges (60 Å porosity, 20–40  $\mu\text{m}$ ). Solvents were purified by use of drying cartridges through a solvent delivery system. Melting points ( $^\circ\text{C}$ ) are uncorrected.

Deuterated NMR solvents were either used as purchased ( $\text{CDCl}_3$  and  $\text{DMSO-}d_6$ ).  $\text{Na}_2\text{SO}_4$ ,  $\text{MgSO}_4$ , acetone, *tert*-butanol, MeOH, and acetonitrile were used as purchased. 3,4-Epoxy-1-butene, 1,2-epoxy-3,4-cyclohexene, 3-bromo-1-propene, and 3-bromo-3,3-difluoro-1-propene were purchased from commercial suppliers and used without further purification. Solvent for reactions were degassed thoroughly with  $\text{N}_2$ .

## Initial Benchtop Reagent Screen

To a 1 dram vial was added photocatalyst,  $[\text{Ni}(\text{dtbbpy})(\text{H}_2\text{O})_4]\text{Cl}_2$ , and radical precursor. The vial was capped, purged and evacuated three times. Under an inert atmosphere, 1.0 mL of dry, degassed solvent was added to the reaction vials via syringe. The vinyl epoxide (0.10 mmol) was weighed in a tared syringe and added to the reaction mixtures under inert atmosphere. After 16 h, the reactions were quenched by addition of EtOAc (5 mL) and washed with brine (2 x 5 mL). Crude reaction mixtures were monitored by  $^1\text{H}$  NMR.

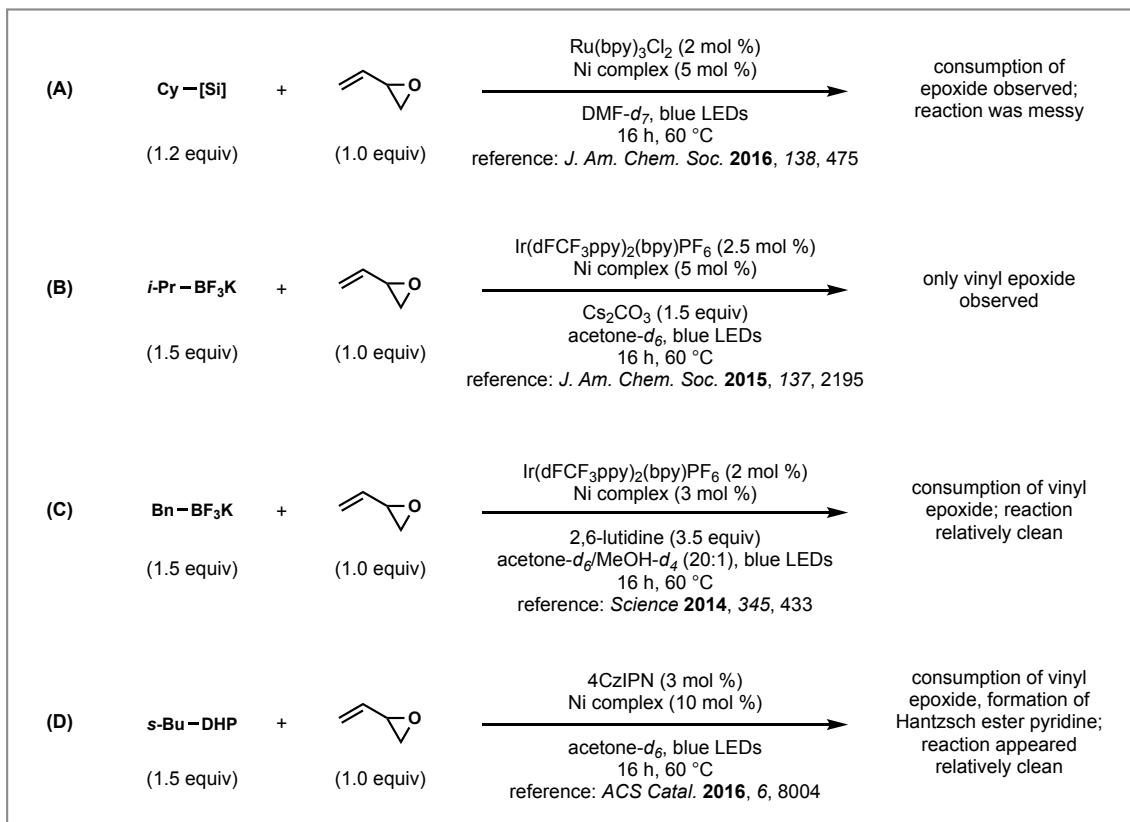

Reaction C on 0.50 mmol scale with isolated yield:

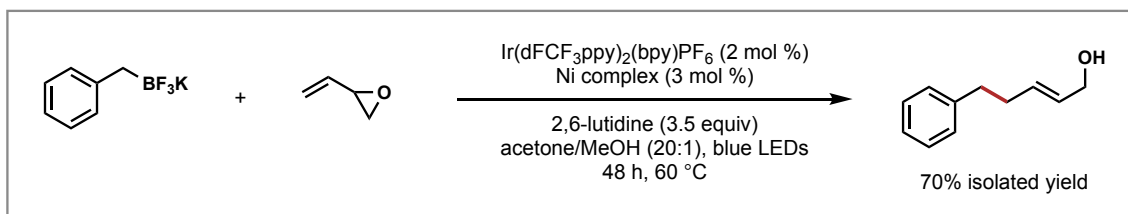

## Control Reaction Studies

To a 2.0 mL dram vial was added photocatalyst,  $[\text{Ni}(\text{dtbbpy})(\text{H}_2\text{O})_4]\text{Cl}_2$ , and alkyltrifluoroborate (1.5 equiv). The vial was capped, purged and evacuated three times. Under an inert atmosphere, 1.5 mL (0.1 M) of dry, degassed solvent was added to the reaction vials via syringe. The vinyl epoxide (0.15 mmol) was weighed in a tared syringe and added to the reaction mixtures under an inert atmosphere. After stirring for 16 h at 60 °C under blue LED irradiation, the reactions were quenched by addition of EtOAc (5 mL) and washed with brine (2 x 5 mL). Crude reaction mixtures were monitored by  $^1\text{H}$  NMR. Yield was calculated using 2,4,6-trimethoxybenzene as an internal standard. Notably, secondary alkylsilicates and -trifluoroborates failed to afford any product, but benzyltrifluoroborate were suitable precursors. In further studies it was demonstrated that secondary alkyl motifs could be included in the scope using 4'-alkyl'-1,4'-dihydropyridines.

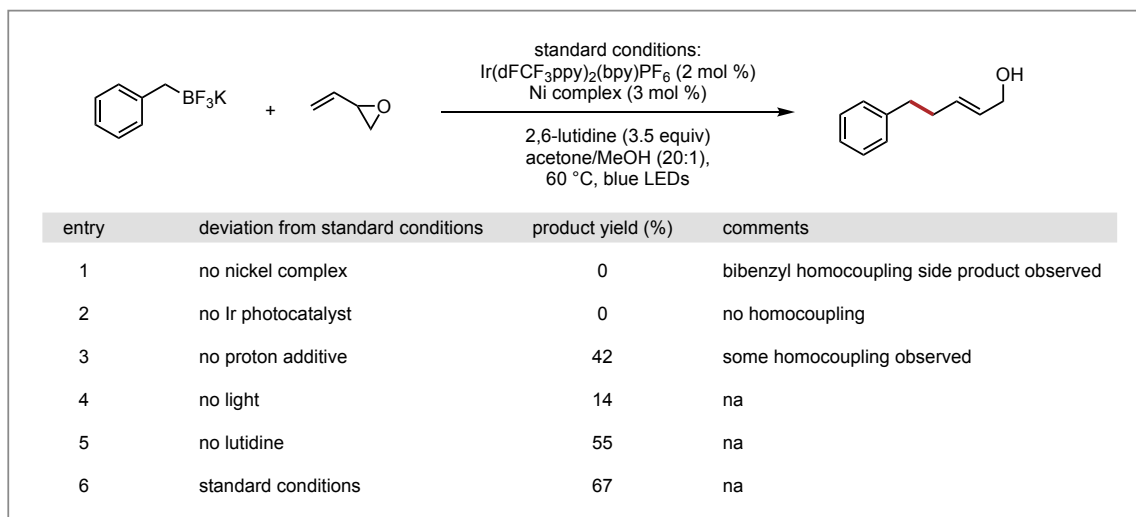



## Further Benchtop Optimization

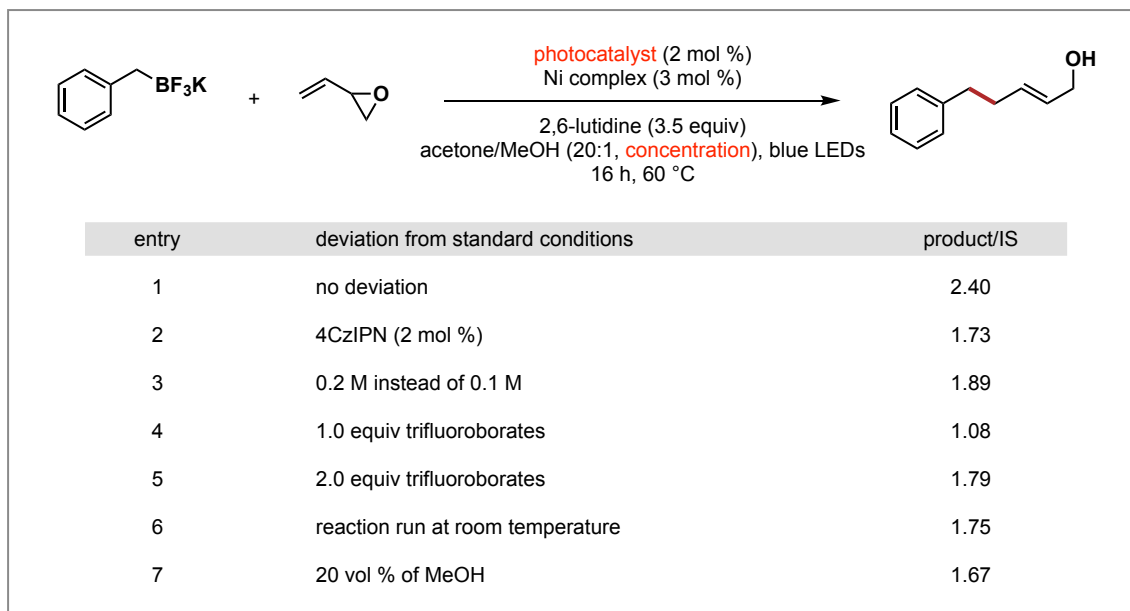

## Optimization Studies in High Throughput Center

High Throughput Experimentation was performed at the Penn/Merck Center for High Throughput Experimentation at the University of Pennsylvania. The screens were analyzed by UPLC with addition of an internal standard. The areas for the internal standard (IS) and product (P) from each of the screens are shown in the tables below. The ratios calculated are pertinent only to that specific screen; the ratios from one screen should not be quantitatively compared to those from a different screen.

*Procedure for high-throughput reactions:* To a 96 well plate reactor containing 1 mL reaction vials equipped with Teflon-coated magnetic stir bar in a glovebox was added sequentially: (1) solution of  $[\text{Ni}(\text{dtbbpy})(\text{H}_2\text{O})_4]\text{Cl}_2$  (0.03 equiv) dissolved in THF, (2) solutions of photocatalysts (0.02 equiv) in THF, (3) slurries of inorganic bases (3.0 equiv), and (4) stock solution containing alkyltrifluoroborate (1.50 equiv) and internal standard (0.10 equiv) to each vial. The THF was then removed *via* Genevac and solutions of (1) vinyl epoxide in reaction solvents THF, toluene, dioxane, MeCN (0.1 M), (2) protic sources MeOH, trifluoroethanol, *tert*-butanol (0.01 M), and (3) basic amines (lutidine, DIPA, 3.00 equiv) were added to each vial. The vials were sealed and stirred over blue LED lights at rt (~23 °C). After 24 h, the reactions were opened to air and diluted with 500  $\mu\text{L}$  of MeCN. After stirring for 15 min, 25  $\mu\text{L}$  aliquots were then taken from the reaction vials and dosed

into a 96 well UPLC block. These aliquots were further diluted by the addition of 700  $\mu$ L of MeCN. The reactions were then analyzed by UPLC.

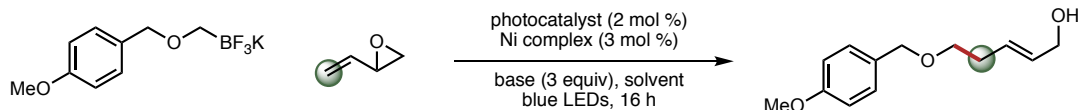

|   | 1        | 2    | 3                               | 4                               | 5                | 6    | 7                               | 8                               | 9             | 10   | 11                              | 12                              |         |         |
|---|----------|------|---------------------------------|---------------------------------|------------------|------|---------------------------------|---------------------------------|---------------|------|---------------------------------|---------------------------------|---------|---------|
| A |          |      |                                 |                                 |                  |      |                                 |                                 |               |      |                                 |                                 | 4CzIPN  | THF     |
| B |          |      |                                 |                                 |                  |      |                                 |                                 |               |      |                                 |                                 |         | toluene |
| C |          |      |                                 |                                 |                  |      |                                 |                                 |               |      |                                 |                                 |         | dioxane |
| D | lutidine | DIPA | K <sub>2</sub> HPO <sub>4</sub> | Cs <sub>2</sub> CO <sub>3</sub> | lutidine         | DIPA | K <sub>2</sub> HPO <sub>4</sub> | Cs <sub>2</sub> CO <sub>3</sub> | lutidine      | DIPA | K <sub>2</sub> HPO <sub>4</sub> | Cs <sub>2</sub> CO <sub>3</sub> |         | MeCN    |
| E |          |      |                                 |                                 |                  |      |                                 |                                 |               |      |                                 |                                 | Ir cat. | THF     |
| F |          |      |                                 |                                 |                  |      |                                 |                                 |               |      |                                 |                                 |         | toluene |
| G |          |      |                                 |                                 |                  |      |                                 |                                 |               |      |                                 |                                 |         | dioxane |
| H |          |      |                                 |                                 |                  |      |                                 |                                 |               |      |                                 |                                 |         | MeCN    |
|   | MeOH     |      |                                 |                                 | trifluoroethanol |      |                                 |                                 | tert -butanol |      |                                 |                                 |         |         |

|   | 1      | 2      | 3      | 4      | 5      | 6      | 7      | 8      | 9      | 10     | 11     | 12     |
|---|--------|--------|--------|--------|--------|--------|--------|--------|--------|--------|--------|--------|
| A | 0.3094 | 0.1915 | 0.212  | 0.1913 | 0.3346 | 0.234  | 0.2206 | 0.1915 | 0.333  | 0.1484 | 0.2164 | 0.1985 |
| B | 0.499  | 0.2845 | 0      | 0      | 0      | 0.3978 | 0.407  | 0      | 0.5474 | 0.1862 | 0      | 0.3812 |
| C | 0.3536 | 0.2543 | 0.217  | 0.2491 | 0.3696 | 0.2272 | 0.25   | 0      | 0      | 0.222  | 0.2249 | 0.2151 |
| D | 0.3572 | 0.2166 | 0.2136 | 0.1786 | 0.3499 | 0.2192 | 0.2193 | 0      | 0.3707 | 0      | 0.1985 | 0.2114 |
| E | 0.2883 | 0.1366 | 0.0933 | 0.0993 | 0.2737 | 0.1274 | 0.1165 | 0      | 0.2172 | 0      | 0.1099 | 0.1295 |
| F | 0.4684 | 0.3178 | 0      | 0.3149 | 0.5068 | 0.3359 | 0.3539 | 0      | 0.4783 | 0      | 0      | 0.3299 |
| G | 0.2599 | 0.1701 | 0.1373 | 0.1403 | 0.2846 | 0.1775 | 0.1471 | 0      | 0.299  | 0.1773 | 0.1682 | 0.1404 |
| H | 0.2327 | 0.1662 | 0.1357 | 0.1369 | 0.2568 | 0.1338 | 0.1201 | 0      | 0.2877 | 0.1605 | 0.1161 | 0.1307 |

**Figure 1.** Calculated product/internal standard ratios by peak area.

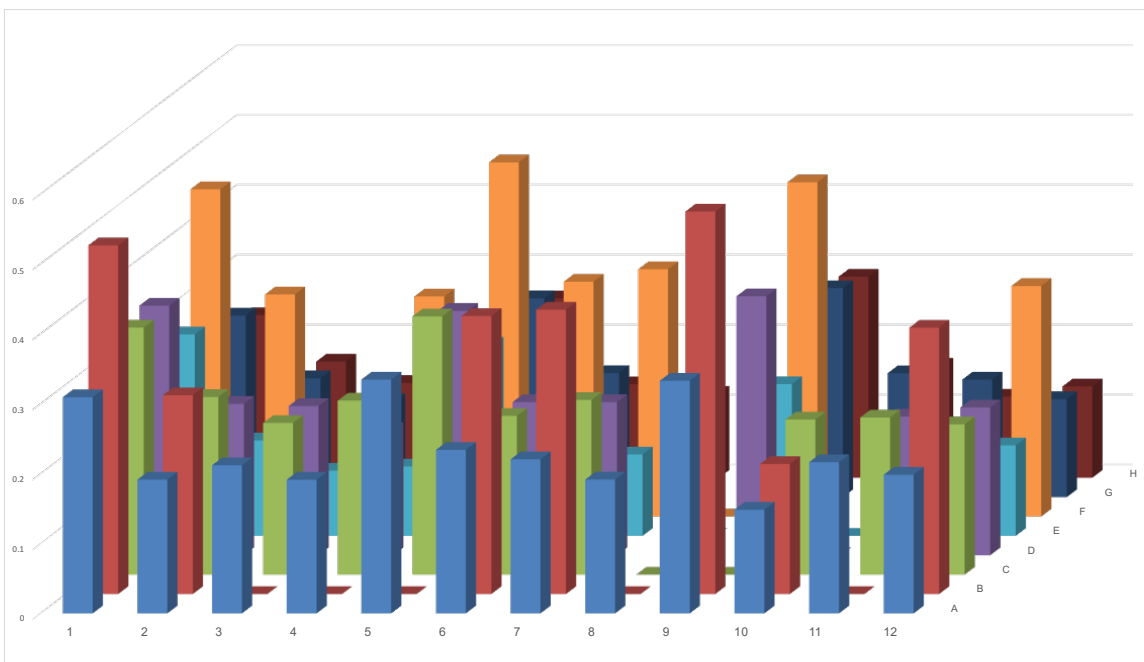

**Figure 2.** Product over internal standard (Y-axis).

### Ruling out Lewis Acid Activation of the Vinyl Epoxide

Potential *Lewis Acid catalyzed* mechanistic pathway:

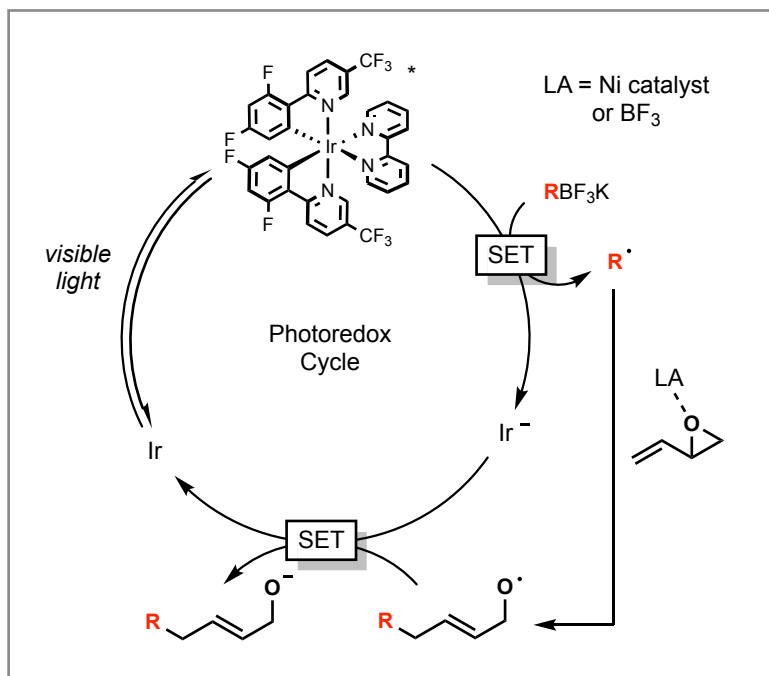

Alternative *dual catalytic* mechanistic pathway:

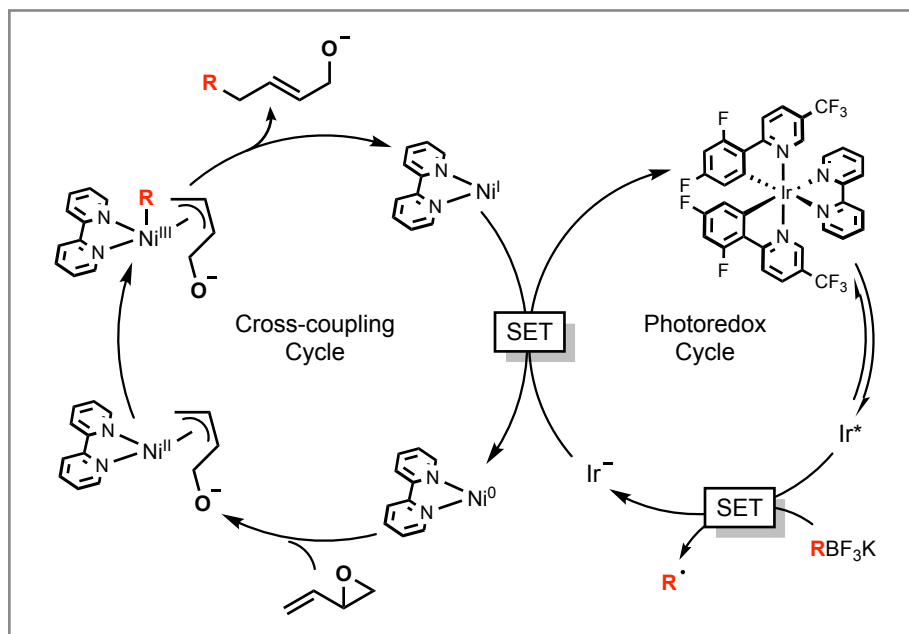

Control studies with various Lewis Acids:

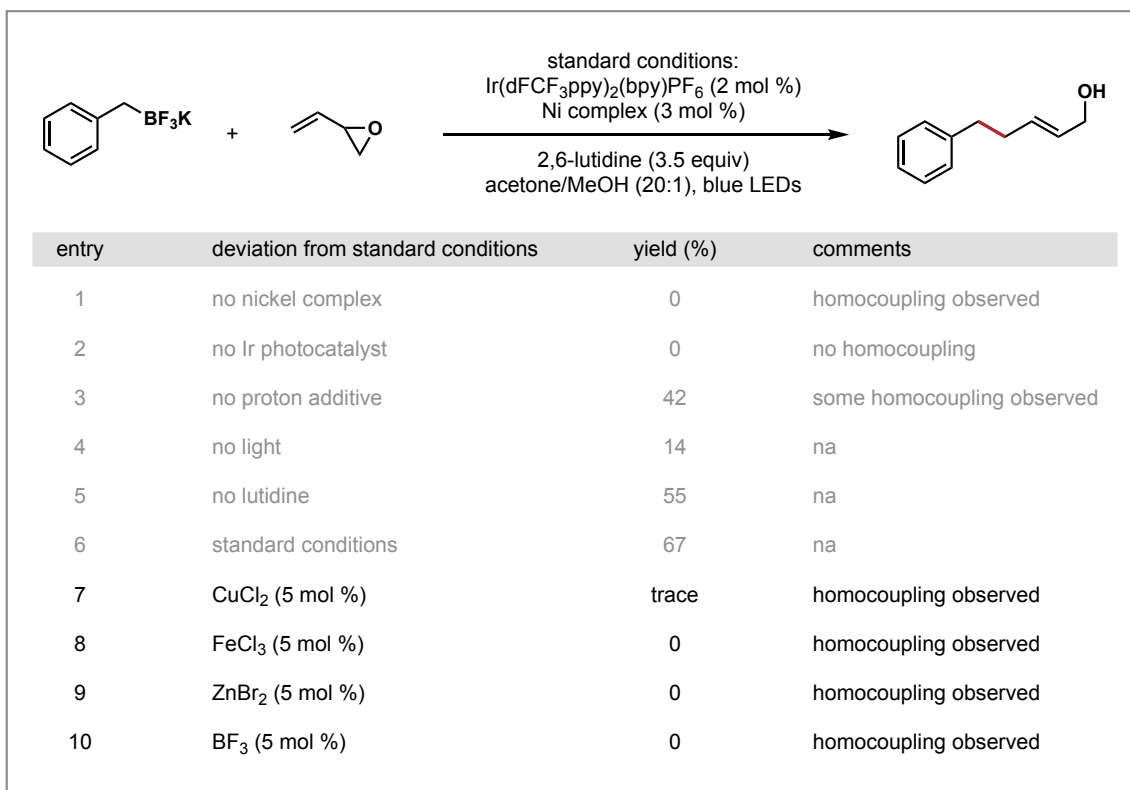

### **General Procedure: Alkylation of Vinyl Epoxides with Alkyltrifluoroborates**

#### **(Procedure A)**

To an 8.0 mL reaction vial, Ir[dFCF<sub>3</sub>ppy]<sub>2</sub>(bpy)PF<sub>6</sub> (10.1 mg, 0.01 mmol, 2 mol %), [Ni(dtbbpy)(H<sub>2</sub>O)<sub>4</sub>]Cl<sub>2</sub> (7.1 mg, 0.015 mmol, 3 mol %), and alkyltrifluoroborate (0.75 mmol, 1.5 equiv) were added. The vial was capped, purged, and evacuated three times. Under N<sub>2</sub>, dry degassed solvent (5 mL) was added. Subsequently, vinyl epoxide (0.50 mmol, 1.0 equiv) and lutidine (202 μL, 1.75 mmol, 3.5 equiv) were added in succession. The reactions were stirred blue LED strips (see pictures below) for 16 h. The reaction mixture was quenched with saturated NaHCO<sub>3</sub> (15 mL) and extracted with EtOAc (3 x 15 mL). The organic extracts were combined and concentrated on Celite. The crude mixture was purified by silica gel column chromatography. All reported E/Z ratios were determined by crude <sup>1</sup>H NMR.

### **General Procedure: Alkylation of Vinyl Epoxides with α-Alkoxytrifluoroborates**

#### **(Procedure B)**

To an 8.0 mL reaction vial, Ir[dFCF<sub>3</sub>ppy]<sub>2</sub>(bpy)PF<sub>6</sub> (10.1 mg, 0.01 mmol, 2 mol %), [Ni(dtbbpy)(H<sub>2</sub>O)<sub>4</sub>]Cl<sub>2</sub> (7.1 mg, 0.015 mmol, 3 mol %), and alkyltrifluoroborate (0.75 mmol, 1.5 equiv) were added. The vial was capped, purged, and evacuated three times. Under N<sub>2</sub>, 5 mL of degassed MeCN/*t*-BuOH (10:1) was added. Subsequently, vinyl epoxide (0.50 mmol, 1.0 equiv) and lutidine (202 μL, 1.75 mmol, 3.5 equiv) were added in succession. Under a fan, the reactions were stirred blue LED strips (see pictures above) for 16–48 h. The reaction mixture was quenched with saturated NaHCO<sub>3</sub> (15 mL) and extracted with EtOAc (3 x 15 mL). The organic extracts were combined and concentrated on Celite. The crude mixture was purified by silica gel column chromatography. All reported E/Z ratios were determined by crude <sup>1</sup>H NMR.

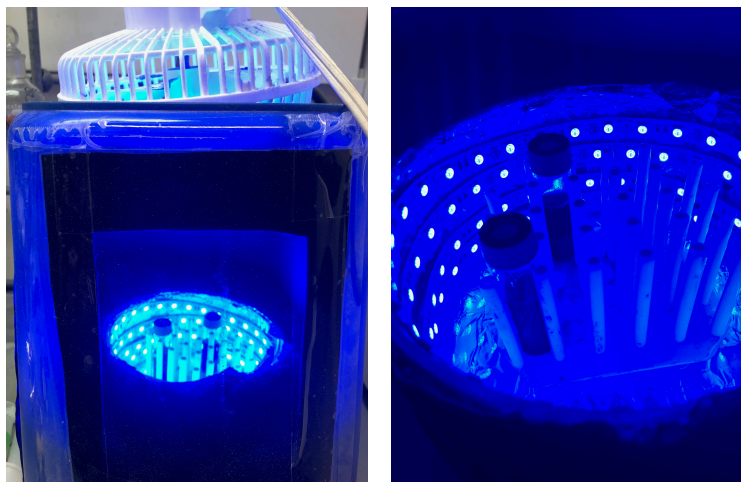

**Figure 2.** Reaction set up with blue LED strips.<sup>1</sup>

### Compound Characterization

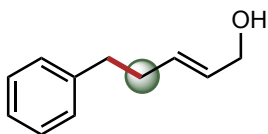

(*E*)-5-Phenylpent-2-en-1-ol<sup>2</sup> (**1a**)

Prepared according to General Procedure A. To maintain the reaction temperature at 60 °C, the blue LED bay was covered with aluminum foil, and the temperature was periodically checked with a digital temperature sensor. After 16 h, the reaction mixture was quenched with saturated NaHCO<sub>3</sub> (15 mL) and extracted with EtOAc (3 x 15 mL). The organic extracts were combined and concentrated on Celite. The crude mixture was purified by silica gel column chromatography (0 to 30% EtOAc/hexanes over 20 min).

**Physical state:** 70% yield, *E/Z* = 95:5, clear oil.

<sup>1</sup>H NMR (500 MHz, CDCl<sub>3</sub>) δ 7.31 (d, *J* = 7.6 Hz, 2H), 7.20 (d, *J* = 7.5 Hz, 3H), 5.72 (m, 2H), 4.10 (m, 2H), 2.73 (t, *J* = 7.9 Hz, 2H), 2.39 (m, 2H), 1.28 (d, *J* = 5.4 Hz, 1H).

<sup>13</sup>C NMR (126 MHz, CDCl<sub>3</sub>) δ 141.8, 132.4, 129.8, 128.6, 128.5, 126.0, 63.9, 35.7, 34.1.

<sup>1</sup> For details on photoreactor setup, see: Lin, K.; Wiles, R. J.; Kelly, C. B.; Davies, G. H. M.; Molander, G. A. *ACS Catal.* **2017**, *7*, 5129–6323.

<sup>2</sup> Zimmer, L. E.; Charette, A. B. *J. Am. Chem. Soc.* **2009**, *131*, 15624–15626.

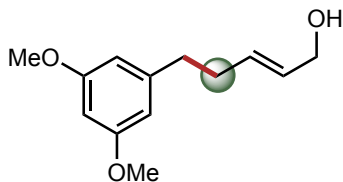

**(E)-5-(3,5-Dimethoxyphenyl)pent-2-en-1-ol (1b)**

Prepared according to General Procedure A. To maintain the reaction temperature at 60 °C, the blue LED bay was covered with aluminum foil, and the temperature was periodically checked with a digital temperature sensor. After 16 h, the reaction mixture was quenched with saturated NaHCO<sub>3</sub> (15 mL) and extracted with EtOAc (3 x 15 mL). The organic extracts were combined and concentrated on Celite. The crude mixture was purified by silica gel column chromatography (0 to 45% EtOAc/hexanes over 20 min).

**Physical state:** 55% yield, *E/Z* = 77:23, clear oil.

**<sup>1</sup>H NMR** (500 MHz, CDCl<sub>3</sub>) δ 6.42 – 6.13 (m, 3H), 5.82 – 5.48 (m, 2H), 4.09 (m, 2H), 3.78 (s, 6H), 2.65 (t, *J* = 8.8 Hz, 2H), 2.42 – 2.30 (m, 2H).

**<sup>13</sup>C NMR** (126 MHz, CDCl<sub>3</sub>) δ 160.9, 144.3, 144.0, 132.4, 131.8, 129.8, 129.4, 106.8, 106.7, 98.0, 97.9, 63.9, 58.6, 55.4, 36.2, 36.0, 33.9, 29.2 (inseparable mixture of *E/Z* isomers; two overlapping peaks).

**HRMS (ES+)** *m/z* calc. for C<sub>13</sub>H<sub>18</sub>O<sub>3</sub> [M<sup>+</sup>] 222.1256, found 222.1271.

**FT-IR** (cm<sup>-1</sup>, neat, ATR) 3368, 2999, 2924, 2854, 1595, 1461, 1429, 1349, 1293, 1148.

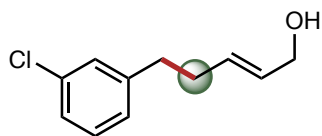

**(E)-5-(3-Chlorophenyl)pent-2-en-1-ol (1c)**

Prepared according to General Procedure A. To maintain the reaction temperature at 60 °C, the blue LED bay was covered with aluminum foil, and the temperature was periodically checked with a digital temperature sensor. After 16 h, the reaction mixture was quenched with saturated NaHCO<sub>3</sub> (15 mL) and extracted with EtOAc (3 x 15 mL). The organic extracts were combined and concentrated on Celite. The crude mixture was purified by silica gel column chromatography (0 to 30% EtOAc/hexanes over 20 min).

**Physical state:** 87% yield, *E/Z* = 90:10, clear oil.

**<sup>1</sup>H NMR** (500 MHz, CDCl<sub>3</sub>) δ 7.34 (d, *J* = 7.6 Hz, 1H), 7.21 – 7.13 (m, 3H), 5.83 – 5.64 (m, 2H), 4.09 (m, 2H), 2.85 – 2.80 (m, 2H), 2.38 (d, *J* = 7.7 Hz, 2H).

$^{13}\text{C}$  NMR (126 MHz,  $\text{CDCl}_3$ )  $\delta$  139.4, 132.0, 130.5, 130.0, 129.6, 127.6, 126.9, 100.1, 63.8, 33.4, 32.4.

**HRMS (ES+)**  $m/z$  calc. for  $\text{C}_{11}\text{H}_{13}\text{ClO}$  [ $\text{M}^+$ ] 196.0655, found 196.0684.

**FT-IR** ( $\text{cm}^{-1}$ , neat, ATR) 3325, 3066, 3017, 2928, 2861, 1670, 1572, 1474, 1051.

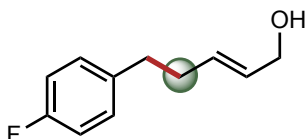

(*E*)-5-(4-Fluorophenyl)pent-2-en-1-ol (**1d**)

Prepared according to General Procedure A. To maintain the reaction temperature at 60 °C, the blue LED bay was covered with aluminum foil, and the temperature was periodically checked with a digital temperature sensor. After 16 h, the reaction mixture was quenched with saturated  $\text{NaHCO}_3$  (15 mL) and extracted with EtOAc (3 x 15 mL). The organic extracts were combined and concentrated on Celite. The crude mixture was purified by silica gel column chromatography (0 to 45% EtOAc/hexanes over 20 min).

**Physical state:** 95% yield, *E/Z* = 90:10, clear oil.

$^1\text{H}$  NMR (500 MHz,  $\text{CDCl}_3$ )  $\delta$  7.13 (t,  $J$  = 6.8 Hz, 2H), 6.97 (t,  $J$  = 8.5 Hz, 2H), 5.77 – 5.61 (m, 2H), 4.15 – 4.07 (m, 2H), 2.69 (t,  $J$  = 7.9 Hz, 2H), 2.39 – 2.33 (m, 2H), 1.27 (s, 1H).

$^{13}\text{C}$  NMR (126 MHz,  $\text{CDCl}_3$ )  $\delta$  161.4 (d,  $J$  = 243.4 Hz), 137.4 (d,  $J$  = 3.2 Hz), 132.0, 129.8 (d,  $J$  = 8.8 Hz), 129.7, 115.0 (d,  $J$  = 21.0 Hz), 63.7, 34.7, 34.1.

$^{19}\text{F}$  NMR (471 MHz,  $\text{C}_6\text{D}_6$ )  $\delta$  -117.4 (minor), -117.7 (major).

**HRMS (ES+)**  $m/z$  calc. for  $\text{C}_{11}\text{H}_{13}\text{FO}$  [ $\text{M}^+$ ] 180.0950, found 180.0946.

**FT-IR** ( $\text{cm}^{-1}$ , neat, ATR) 3331, 2927, 2860, 1601, 1508, 1454, 1416, 1219, 1157, 999.

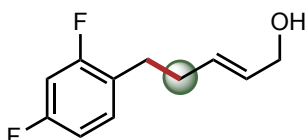

(*E*)-5-(2,4-Difluorophenyl)pent-2-en-1-ol (**1e**)

Prepared according to General Procedure A. To maintain the reaction temperature at 60 °C, the blue LED bay was covered with aluminum foil, and the temperature was periodically checked with a digital temperature sensor. After 16 h, the reaction mixture was quenched with saturated  $\text{NaHCO}_3$  (15 mL) and extracted with EtOAc (3 x 15 mL).



The organic extracts were combined and concentrated on Celite. The crude mixture was purified by silica gel column chromatography (0 to 25% EtOAc/hexanes over 20 min).

**Physical state:** 88% yield, *E/Z* = 88:12, yellow oil.

**<sup>1</sup>H NMR** (500 MHz, CDCl<sub>3</sub>) δ 7.13 (d, *J* = 6.7 Hz, 2H), 6.96 (d, *J* = 8.4 Hz, 2H), 5.69 (m, 2H), 4.09 (m, 2H), 2.69 (t, *J* = 8.0 Hz, 2H), 2.53 (m, 1H), 2.36 (m, 2H).

**<sup>13</sup>C NMR** (126 MHz, CDCl<sub>3</sub>) δ 161.5 (dd, *J* = 246.2, 12.1 Hz), 161.1 (dd, *J* = 247.3, 11.7 Hz), 131.7, 131.2 (dd, *J* = 9.5, 2.6 Hz), 130.2, 124.4 (dd, *J* = 16.2, 3.8 Hz), 111.0 (dd, *J* = 20.9, 3.8 Hz), 103.7 (dd, *J* = 25.4, 0.7 Hz), 63.8, 32.8, 28.3.

**<sup>19</sup>F NMR** (471 MHz, C<sub>6</sub>D<sub>6</sub>) δ -113.31 (d, *J* = 7.0 Hz), -114.36 (d, *J* = 7.0 Hz) (minor *Z* isomer); -113.66 (d, *J* = 7.0 Hz), -114.49 (d, *J* = 6.8 Hz) (major *E* isomer).

**HRMS (ES<sup>+</sup>)** *m/z* calc. for C<sub>11</sub>H<sub>12</sub>F<sub>2</sub>O [M<sup>+</sup>] 198.0856, found 198.0877.

**FT-IR** (cm<sup>-1</sup>, neat, ATR) 3341, 2932, 2864, 1618, 1601, 1504, 1456, 1427, 1375, 1272, 1136.

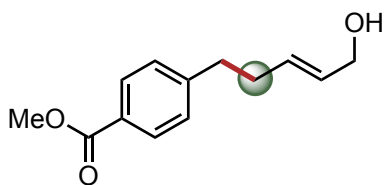

Methyl (*E*)-4-(5-Hydroxypent-3-en-1-yl)benzoate (**1f**)

Prepared according to General Procedure A. To maintain the reaction temperature at 60 °C, the blue LED bay was covered with aluminum foil, and the temperature was periodically checked with a digital temperature sensor. After 16 h, the reaction mixture was quenched with saturated NaHCO<sub>3</sub> (15 mL) and extracted with EtOAc (3 x 15 mL). The organic extracts were combined and concentrated on Celite. The crude mixture was purified by silica gel column chromatography (0 to 40% EtOAc/hexanes over 20 min).

**Physical state:** 95% yield, *E/Z* = >20:1, clear oil.

**<sup>1</sup>H NMR** (500 MHz, CDCl<sub>3</sub>) δ 7.88 (d, *J* = 8.1 Hz, 2H), 7.17 (d, *J* = 8.0 Hz, 2H), 5.67 – 5.53 (m, 2H), 4.01 (m, 2H), 3.83 (s, 3H), 2.72 – 2.66 (m, 2H), 2.32 (m, 2H).

**<sup>13</sup>C NMR** (126 MHz, CDCl<sub>3</sub>) δ 167.3, 147.3, 131.7, 130.2, 129.8, 128.6, 128.1, 63.7, 52.1, 35.7, 33.7.

**HRMS (ES<sup>+</sup>)** *m/z* calc. for C<sub>13</sub>H<sub>16</sub>O<sub>3</sub> [M<sup>+</sup>] 220.1099, found 220.1099.

**FT-IR** (cm<sup>-1</sup>, neat, ATR) 3418, 2950, 2858, 1717, 1610, 1435, 1415, 1310, 1276, 1107, 968.

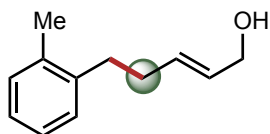

**(E)-5-(o-Tolyl)pent-2-en-1-ol (1g)**

Prepared according to General Procedure A. To maintain the reaction temperature at 60 °C, the blue LED bay was covered with aluminum foil, and the temperature was periodically checked with a digital temperature sensor. After 16 h, the reaction mixture was quenched with saturated NaHCO<sub>3</sub> (15 mL) and extracted with EtOAc (3 x 15 mL). The organic extracts were combined and concentrated on Celite. The crude mixture was purified by silica gel column chromatography (0 to 35% EtOAc/hexanes over 20 min).

**Physical state:** 62% yield, *E/Z* = 85:15, clear oil.

**<sup>1</sup>H NMR** (500 MHz, CDCl<sub>3</sub>) δ 7.19 – 7.09 (m, 4H), 5.87 – 5.56 (m, 2H), 4.10 (m, 2H), 2.76 – 2.64 (m, 2H), 2.39 – 2.28 (m, 5H), 1.27 (t, *J* = 5.7 Hz, 1H).

**<sup>13</sup>C NMR** (126 MHz, CDCl<sub>3</sub>) δ 140.0, 136.0, 132.6, 130.3, 129.6, 128.9, 126.2, 126.1, 63.9, 33.0, 32.9, 19.5.

**HRMS (ES+)** *m/z* calc. for C<sub>12</sub>H<sub>16</sub>O [*M*<sup>+</sup>] 176.1201, found 176.1214.

**FT-IR** (cm<sup>-1</sup>, neat, ATR) 3326, 3016, 2926, 2865, 1670, 1604, 1492, 1458, 1379, 1218, 998.

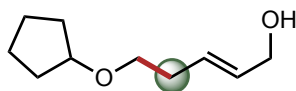

**(E)-5-(Cyclopentyloxy)pent-2-en-1-ol (1h)**

Prepared according to General Procedure B. The reactions were stirred under a fan near blue LED strips. The reaction progression was monitored *via* crude proton NMR. After 16 h, the reaction mixture was quenched with saturated NaHCO<sub>3</sub> (15 mL) and extracted with EtOAc (3 x 15 mL). The organic extracts were combined and concentrated on Celite. The crude mixture was purified by silica gel column chromatography (0 to 45% EtOAc/hexanes over 20 min).

**Physical state:** 73% yield, *E/Z* = 88:12, clear oil.

**<sup>1</sup>H NMR** (500 MHz, CDCl<sub>3</sub>) δ 5.88 (m, 1H), 5.62 (m, 1H), 4.09 (m, 2H), 3.90 (s (broad), 1H), 3.41 (d, *J* = 6.9 Hz, 2H), 2.38 (t, *J* = 6.8 Hz, 2H), 1.69 (m, 7H), 1.53 – 1.49 (m, 2H).

**<sup>13</sup>C NMR** (126 MHz, CDCl<sub>3</sub>) δ 131.1, 130.5, 81.9, 67.2, 57.6, 32.2, 28.4, 23.6.

**HRMS (ES+)** *m/z* calc. for C<sub>10</sub>H<sub>18</sub>O<sub>2</sub> [*M*<sup>+</sup>] 170.1307, found 170.1329.

**FT-IR** (cm<sup>-1</sup>, neat, ATR) 3378, 3018, 2955, 2869, 1723, 1655, 1348, 1091, 10001, 703.

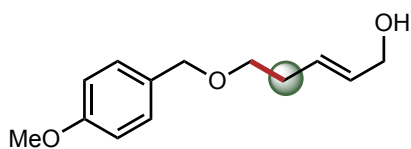

**(E)-5-((4-Methoxybenzyl)oxy)pent-2-en-1-ol (1i)**

Prepared according to General Procedure B. The reactions were stirred under a fan near blue LED strips. The reaction progression was monitored *via* crude proton NMR. After 16 h, the reaction mixture was quenched with saturated NaHCO<sub>3</sub> (15 mL) and extracted with EtOAc (3 x 15 mL). The organic extracts were combined and concentrated on Celite. The crude mixture was purified by silica gel column chromatography (0 to 45% EtOAc/hexanes over 20 min).

**Physical state:** 64% yield, *E/Z* = 81:19, clear oil.

**<sup>1</sup>H NMR** (500 MHz, CDCl<sub>3</sub>) δ 7.25 (s, 2H), 6.88 (d, *J* = 8.1 Hz, 2H), 5.82 (m, 1H), 5.61 (m, 1H), 4.45 (s, 2H), 4.11 (m, 2H), 3.80 (s, 3H), 3.47 (t, *J* = 6.3 Hz, 2H), 2.40 (m, 2H), 2.05 (s, 1H).

**<sup>13</sup>C NMR** (126 MHz, CDCl<sub>3</sub>) δ 159.5, 131.0, 130.0, 129.5, 129.4, 114.0, 73.0, 68.8, 57.9, 55.4, 28.2.

**HRMS (ES<sup>+</sup>)** *m/z* calc. for C<sub>13</sub>H<sub>18</sub>O<sub>3</sub> [M<sup>+</sup>] 222.1256, found 222.1254.

**FT-IR** (cm<sup>-1</sup>, neat, ATR) 3401, 3013, 2859, 1612, 1586, 1512, 1464, 1442, 1422, 1361, 1174, 1088, 1033.

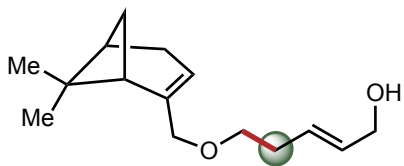

**(E)-5-(((1*R*,5*S*)-6,6-Dimethylbicyclo[3.1.1]hept-2-en-2-yl)methoxy)pent-2-en-1-ol (1j)**

Prepared according to General Procedure B. The reactions were stirred under a fan near blue LED strips. The reaction progression was monitored *via* crude proton NMR. After 16 h, the reaction mixture was quenched with saturated NaHCO<sub>3</sub> (15 mL) and extracted with EtOAc (3 x 15 mL). The organic extracts were combined and concentrated on Celite. The crude mixture was purified by silica gel column chromatography (0 to 50% EtOAc/hexanes over 20 min).

**Physical state:** 60% yield, *E/Z* = 84:16, clear oil.

**<sup>1</sup>H NMR** (500 MHz, CDCl<sub>3</sub>) δ 5.94 – 5.54 (m, 2H), 5.49 (s, 1H), 4.13 (m, 2H), 3.85 (s, 2H), 3.41 (t, *J* = 6.3 Hz, 2H), 2.42 – 2.38 (m, 2H), 2.34 – 2.23 (m, 2H), 2.23 – 2.14 (m, 2H), 2.11 (d, *J* = 6.1 Hz, 1H), 1.30 (m, 4H), 1.17 (d, *J* = 8.4 Hz, 1H), 0.84 (d, *J* = 4.0 Hz, 3H).

**<sup>13</sup>C NMR** (126 MHz, CDCl<sub>3</sub>) δ 154.4, 131.1, 131.0, 130.8, 129.9, 73.6, 72.9, 63.9, 61.3, 60.0, 57.4, 33.7, 28.7, 27.7, 27.5.

**HRMS (ES<sup>+</sup>)** *m/z* calc. for C<sub>15</sub>H<sub>24</sub>O<sub>2</sub> [M<sup>+</sup>] 236.1776, found 236.1777.

**FT-IR** (cm<sup>-1</sup>, neat, ATR) 3392, 2985, 2913, 1725, 1655, 1468, 1431, 1382, 1365, 1084, 1040.

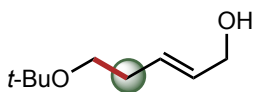

(*E*)-5-(*tert*-Butoxy)pent-2-en-1-ol (**1k**)

Prepared according to General Procedure B. The reactions were stirred under a fan near blue LED strips. The reaction progression was monitored *via* crude proton NMR. After 16 h, the reaction mixture was quenched with saturated NaHCO<sub>3</sub> (15 mL) and extracted with EtOAc (3 x 15 mL). The organic extracts were combined and concentrated on Celite. The crude mixture was purified by silica gel column chromatography (0 to 40% EtOAc/hexanes over 20 min).

**Physical state:** 62% yield, *E/Z* = 53:47, clear oil.

**<sup>1</sup>H NMR** (500 MHz, CDCl<sub>3</sub>) δ 5.96 – 5.54 (m, 2H), 4.08 (m, 2H), 3.43 – 3.34 (m, 2H), 2.31 (m, 2H), 1.18 (s, 9H).

**<sup>13</sup>C NMR** (126 MHz, CDCl<sub>3</sub>) δ 130.8, 130.7, 130.5, 129.7, 73.3, 72.7, 63.7, 61.1, 59.8, 57.2, 33.5, 28.5, 27.5, 27.3 (inseparable mixture of two diastereomers).

**HRMS (ES<sup>+</sup>)** *m/z* calc. for C<sub>9</sub>H<sub>18</sub>O<sub>2</sub> [M - CH<sub>3</sub>] 143.1078, found 143.1078.

**FT-IR** (cm<sup>-1</sup>, neat, ATR) 3386, 2973, 2932, 1391, 1195, 1078, 1019, 945.

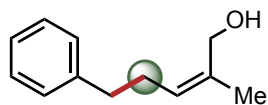

(*Z*)-2-Methyl-5-phenylpent-2-en-1-ol (**2f**)

Prepared according to General Procedure B. The reactions were stirred under a fan near blue LED strips. The reaction progression was monitored *via* crude proton NMR. After 16 h, the reaction mixture was quenched with saturated NaHCO<sub>3</sub> (15 mL) and extracted with EtOAc (3 x 15 mL). The organic extracts were combined and concentrated on Celite. The

crude mixture was purified by silica gel column chromatography (0 to 35% EtOAc/hexanes over 20 min).

**Physical state:** 49% yield, *E/Z* = 94:6, clear oil.

**<sup>1</sup>H NMR** (500 MHz, CDCl<sub>3</sub>) δ 7.29 (t, *J* = 7.7 Hz, 2H), 7.21 (d, *J* = 7.4 Hz, 3H), 5.48 (t, *J* = 7.5 Hz, 1H), 4.00 (m, 2H), 2.69 (t, *J* = 7.9 Hz, 2H), 2.38 (m, 2H), 1.63 (s, 3H), 1.36 (s, 1H).

**<sup>13</sup>C NMR** (126 MHz, CDCl<sub>3</sub>) δ 142.1, 135.6, 128.6, 128.4, 126.0, 125.4, 69.0, 35.9, 29.7, 13.8.

**HRMS (ES+)** *m/z* calc. for C<sub>12</sub>H<sub>16</sub>O [M<sup>+</sup>] 176.1201, found 176.1201.

**FT-IR** (cm<sup>-1</sup>, neat, ATR) 3370, 3062, 3027, 2922, 2858, 1672, 1603, 1496, 1453, 1259, 1003, 851, 748, 699.

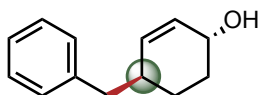

(1R,4S)-4-benzylcyclohex-2-en-1-ol (**2m**)

Prepared according to General Procedure B. The reactions were stirred under a fan near blue LED strips. The reaction progression was monitored *via* crude proton NMR. After 16 h, the reaction mixture was quenched with saturated NaHCO<sub>3</sub> (15 mL) and extracted with EtOAc (3 x 15 mL). The organic extracts were combined and concentrated on Celite. The crude mixture was purified by silica gel column chromatography (0 to 40% EtOAc/hexanes over 20 min). Characterization data agreed with reported literature values.<sup>1</sup>

**Physical state:** 46% yield, *E/Z* = 90:10, clear oil.

**<sup>1</sup>H NMR** (500 MHz, CDCl<sub>3</sub>) δ 7.29 (m, 2H), 7.22 – 7.15 (m, 3H), 5.73 – 5.65 (m, 2H), 4.20 – 4.23 (m, 1H), 2.64 (dd, *J* = 13.3, 7.1 Hz, 1H), 2.52 (dd, *J* = 13.3, 8.1 Hz, 1H), 2.37 – 2.42 (m, 1H), 2.03 – 2.06 (m, 1H), 1.82 – 1.75 (m, 1H), 1.46 – 1.38 (m, 2H), 1.30 – 1.25 (m, 1H).

**<sup>13</sup>C NMR** (126 MHz, CDCl<sub>3</sub>) δ 140.3, 133.8, 130.8, 129.2, 128.4, 126.1, 67.1, 42.3, 37.5, 31.8, 26.8.

**HRMS (ES+)** *m/z* calc. for C<sub>13</sub>H<sub>16</sub>O [M<sup>+</sup>] 188.1201, found 188.1209.

**FT-IR** (cm<sup>-1</sup>, neat, ATR) 3395, 3027, 2925, 1671, 1495, 1454, 1058, 701.

<sup>1</sup> Narasaka, K.; Kusama, H.; Hayashi, Y. *Tetrahedron* **1992**, *48*, 2059–2068.

## GENERAL PROCEDURE: ALKYLATION OF VINYL EPOXIDES WITH 1,4-DIHYDROPYRIDINES (PROCEDURE C)

To an 8.0 mL reaction vial, 4CzIPN (7.8 mg, 0.01 mmol, 2 mol %), [Ni(dtbbpy)(H<sub>2</sub>O)<sub>4</sub>Cl<sub>2</sub>] (7.1 mg, 0.015 mmol, 3 mol %), and 1,4-dihydropyridine (0.75 mmol, 1.5 equiv) were added. The vial was capped, purged, and evacuated three times. Under N<sub>2</sub>, dry degassed acetone (5 mL, 0.1 M) and vinyl epoxide (0.5 mmol, 1.0 equiv) were added. Under a fan, the reactions were stirred in the presence of blue

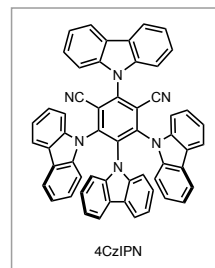

LED strips (see pictures below) for 16 h. The reaction mixture was quenched with saturated NaHCO<sub>3</sub> (15 mL) and extracted with EtOAc (3 x 15 mL). The organic extracts were combined and concentrated on Celite. The crude mixture was purified by silica gel column chromatography. All reported E/Z ratios were determined by crude <sup>1</sup>H NMR.

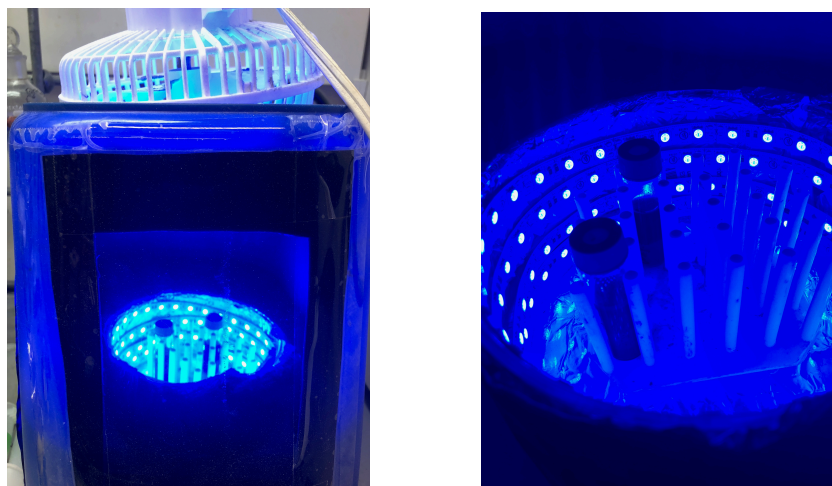

**Figure 2.** Reaction set up with blue LED strips.<sup>1</sup>

<sup>1</sup> For details on photoreactor setup, see: Lin, K.; Wiles, R. J.; Kelly, C. B.; Davies, G. H. M.; Molander, G. A. *ACS Catal.* **2017**, *7*, 5129–6323.

## Compound Characterization

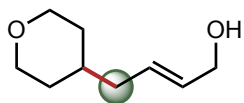

### (*E*)-4-(Tetrahydro-2H-pyran-4-yl)but-2-en-1-ol (**2a**)

Prepared according to General Procedure C. The reactions were stirred under a fan near blue LED strips. The reaction progression was monitored *via* crude proton NMR and TLC with *para*-anisaldehyde as a stain (dark blue after heating). After 16 h, the reaction mixture was concentrated on Celite and purified by silica gel column chromatography (0 to 40% EtOAc/hexanes over 20 min).

**Physical state:** 91% yield, *E/Z* = >20:1, clear oil.

**<sup>1</sup>H NMR** (500 MHz, CDCl<sub>3</sub>) δ 5.73 – 5.61 (m, 2H), 4.14 – 4.05 (m, 2H), 3.94 (m, 2H), 3.35 (t, *J* = 11.7 Hz, 2H), 2.00 (d, *J* = 5.7 Hz, 2H), 1.65 – 1.51 (m, 4H), 1.39 – 1.34 (m, 1H), 1.28 (d, *J* = 12.5 Hz, 1H).

**<sup>13</sup>C NMR** (126 MHz, CDCl<sub>3</sub>) δ 130.9, 130.6, 68.2, 63.8, 39.7, 35.2, 33.0.

**HRMS (ES<sup>+</sup>)** *m/z* calc. for C<sub>9</sub>H<sub>16</sub>O<sub>2</sub> [M<sup>+</sup>] 156.1150, found 156.1158.

**FT-IR** (cm<sup>-1</sup>, neat, ATR) 3403, 2916, 2843, 1724, 1444, 1233, 1134, 1090, 1013, 981, 850.

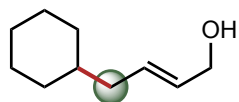

### (*E*)-4-Cyclohexylbut-2-en-1-ol (**2b**)

Prepared according to General Procedure C. The reactions were stirred under a fan near blue LED strips. The reaction progression was monitored *via* crude proton NMR and TLC with *para*-anisaldehyde as a stain (dark blue after heating). After 16 h, the reaction mixture was concentrated on Celite and purified by silica gel column chromatography (0 to 40% EtOAc/hexanes over 20 min). Spectra are in agreement with reported literature values.<sup>2</sup>

**Physical state:** 87% yield, *E/Z* = 94:6, clear oil.

**<sup>1</sup>H NMR** (500 MHz, CDCl<sub>3</sub>) δ 5.70 – 5.67 (m, 2H), 4.10 (m, 2H), 2.18 – 1.88 (m, 7H), 1.78 – 1.61 (m, 3H), 1.34 – 1.14 (m, 3H).

**<sup>13</sup>C NMR** (126 MHz, CDCl<sub>3</sub>) δ 131.7, 130.4, 64.0, 39.4, 39.1, 33.7, 25.4, 25.2.

<sup>2</sup> Guzman-Martinez, A.; Hoveyda, A. H. *J. Am. Chem. Soc.* **2010**, *132*, 10634–10637

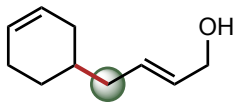

(*E*)-4-(Cyclohex-3-en-1-yl)but-2-en-1-ol (**2c**)

Prepared according to General Procedure C. The reaction was stirred under a fan near blue LED strips. The reaction progression was monitored *via* crude proton NMR and TLC with  $\text{KMnO}_4$  as a stain. After 16 h, the reaction mixture was concentrated on Celite and purified by silica gel column chromatography (0 to 40% EtOAc/hexanes over 20 min).

**Physical state:** 62% yield, *E/Z* = 86:14, clear oil.

**$^1\text{H NMR}$**  (500 MHz,  $\text{CDCl}_3$ )  $\delta$  5.72 – 5.63 (m, 4H), 4.10 (m, 2H), 2.13 – 1.96 (m, 6H), 1.74 – 1.64 (m, 2H), 1.23 (t,  $J$  = 5.8 Hz, 2H).

**$^{13}\text{C NMR}$**  (126 MHz,  $\text{CDCl}_3$ )  $\delta$  131.7, 130.4, 127.1, 126.5, 63.9, 39.4, 33.7, 31.7, 28.6, 25.2.

**HRMS (ES+)**  $m/z$  calc. for  $\text{C}_{10}\text{H}_{16}\text{O}$  [ $\text{M}^+$ ] 152.1201, found 152.1221.

**FT-IR** ( $\text{cm}^{-1}$ , neat, ATR) 3342, 3021, 2912, 1729, 1563, 1438, 971.

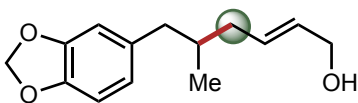

(*E*)-6-(Benzo[d][1,3]dioxol-5-yl)-5-methylhex-2-en-1-ol (**2d**)

Prepared according to General Procedure C. The reactions were stirred under a fan near blue LED strips. The reaction progression was monitored *via* crude proton NMR and TLC with *para*-anisaldehyde as a stain (dark blue after heating). After 16 h, the reaction mixture was concentrated on Celite and purified by silica gel column chromatography (0 to 40% EtOAc/hexanes over 20 min).

**Physical state:** 85% yield, *E/Z* = 90:10, clear oil.

**$^1\text{H NMR}$**  (500 MHz,  $\text{CDCl}_3$ )  $\delta$  6.73 (d,  $J$  = 7.7 Hz, 1H), 6.65 (s, 1H), 6.59 (d,  $J$  = 7.9 Hz, 1H), 5.93 (s, 2H), 5.75 – 5.51 (m, 2H), 4.19 – 4.01 (m, 2H), 2.56 (dd,  $J$  = 13.5, 6.4 Hz, 1H), 2.32 (dd,  $J$  = 13.5, 7.9 Hz, 1H), 2.10 (dd,  $J$  = 12.4, 6.8 Hz, 1H), 1.91 (dt,  $J$  = 14.0, 6.6 Hz, 1H), 1.82 – 1.70 (m, 1H), 0.87 (d,  $J$  = 6.5 Hz, 3H).

**$^{13}\text{C NMR}$**  (126 MHz,  $\text{CDCl}_3$ )  $\delta$  147.6, 145.7, 135.2, 131.6, 130.7, 122.1, 109.6, 108.1, 100.9, 63.9, 43.0, 39.3, 35.4, 19.4.

**HRMS (ES+)**  $m/z$  calc. for  $\text{C}_{14}\text{H}_{18}\text{O}_3$  [ $\text{M}^+$ ] 234.1256, found 234.1258.

**FT-IR** ( $\text{cm}^{-1}$ , neat, ATR) 3356, 2912, 1729, 1503, 1489, 1441, 1377, 1247, 1189, 1098, 936, 809.



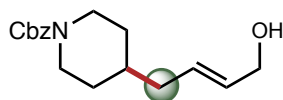

**Benzyl (E)-4-(4-hydroxybut-2-en-1-yl)piperidine-1-carboxylate (2e)**

Prepared according to General Procedure C. The reactions were stirred under a fan near blue LED strips. The reaction progression was monitored *via* crude proton NMR and TLC with *para*-anisaldehyde as a stain (dark blue after heating). After 16 h, the reaction mixture was concentrated on Celite and purified by silica gel column chromatography (0 to 60% EtOAc/hexanes over 20 min).

**Physical state:** 68% yield, *E/Z* = 91:9, clear oil.

**<sup>1</sup>H NMR** (500 MHz, CDCl<sub>3</sub>) 7.39 – 7.31 (m, 5H), 5.69 – 5.61 (m, 2H), 5.13 – 5.10 (m, 2H), 4.17 (m, 2H), 4.10 (m, 2H), 2.80 – 2.70 (m, 2H), 2.01 (m, 2H), 1.67 (d, *J* = 13.0 Hz, 2H), 1.48 (m, 1H), 1.17 – 1.08 (m, 2H).

**<sup>13</sup>C NMR** (126 MHz, CDCl<sub>3</sub>) δ 155.4, 137.1, 131.1, 130.4, 128.6, 128.1, 128.0, 128.0, 67.1, 63.7, 44.3, 39.3, 36.2.

**HRMS (ES+)** *m/z* calc. for C<sub>17</sub>H<sub>23</sub>NO<sub>3</sub> [M<sup>+</sup>] 289.1678, found 289.1689.

**FT-IR** (cm<sup>-1</sup>, neat, ATR) 3433, 2910, 1694, 1433, 1238, 1178, 1011, 969.

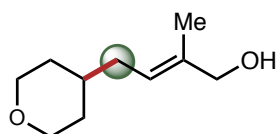

**(E)-2-Methyl-4-(tetrahydro-2H-pyran-4-yl)but-2-en-1-ol (2g)**

Prepared according to General Procedure C. The reactions were stirred under a fan near blue LED strips. The reaction progression was monitored *via* crude proton NMR and TLC with *para*-anisaldehyde as a stain (dark blue after heating). After 16 h, the reaction mixture was concentrated on Celite and purified by silica gel column chromatography (0 to 40% EtOAc/hexanes over 20 min).

**Physical state:** 49% yield, *E/Z* = 82:18, clear oil.

**<sup>1</sup>H NMR** (500 MHz, CDCl<sub>3</sub>) δ 5.36 – 5.25 (m, 1H), 4.13 (m, 2H), 3.94 (dd, *J* = 11.6, 4.5 Hz, 2H), 3.35 (t, *J* = 11.6 Hz, 2H), 2.00 (d, *J* = 6.9 Hz, 2H), 1.81 (s, 3H), 1.52 – 1.46 (m, 1H), 1.35 – 1.08 (m, 4H).

**<sup>13</sup>C NMR** (126 MHz, CDCl<sub>3</sub>) 135.7, 126.2, 123.8, 68.2, 61.7, 35.9, 34.9, 33.1, 21.5.

**HRMS (ES+)** *m/z* calc. for C<sub>10</sub>H<sub>18</sub>O<sub>2</sub> [M<sup>+</sup>] 170.1307, found 170.1315.

**FT-IR** ( $\text{cm}^{-1}$ , neat, ATR) 3391, 2917, 2845, 1729, 1444, 1386, 1297, 1266, 1233, 1180, 1090, 982,

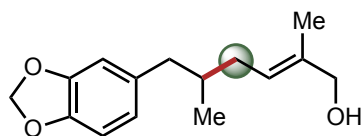

(*E*)-6-(Benzo[d][1,3]dioxol-5-yl)-2,5-dimethylhex-2-en-1-ol (**2h**)

Prepared according to General Procedure C. The reactions were stirred under a fan near blue LED strips. The reaction progression was monitored *via* crude proton NMR and TLC with *para*-anisaldehyde as a stain (dark blue after heating). After 16 h, the reaction mixture was concentrated on Celite and purified by silica gel column chromatography (0 to 40 EtOAc/hexanes over 20 min).

**Physical state:** 85% yield, *E/Z* = 90:10, clear oil.

**$^1\text{H}$  NMR** (500 MHz,  $\text{CDCl}_3$ )  $\delta$  6.73 (d,  $J = 7.7$  Hz, 1H), 6.65 (s, 1H), 6.60 (d,  $J = 7.9$  Hz, 1H), 5.93 (s, 2H), 5.50 – 5.40 (m, 1H), 4.03 (m, 2H), 2.59 – 2.55 (m, 1H), 2.33 (dd,  $J = 13.5, 8.0$  Hz, 1H), 2.09 – 2.03 (m, 1H), 1.92 (d,  $J = 7.2$  Hz, 1H), 1.76 (dt,  $J = 14.0, 6.9$  Hz, 1H), 1.65 (s, 3H), 0.87 (d,  $J = 6.6$  Hz, 3H).

**$^{13}\text{C}$  NMR** (126 MHz,  $\text{CDCl}_3$ )  $\delta$  147.5, 145.7, 135.9, 135.3, 124.9, 122.0, 109.6, 108.1, 100.8, 69.2, 43.1, 35.9, 34.6, 19.5, 14.0.

**HRMS (ES<sup>+</sup>)**  $m/z$  calc. for  $\text{C}_{15}\text{H}_{20}\text{O}_3$  [ $\text{M}^+$ ] 248.1412, found 248.1405.

**FT-IR** ( $\text{cm}^{-1}$ , neat, ATR) 3418, 2948, 2937, 1382, 1255, 1212, 1167, 1068, 999, 918, 512.

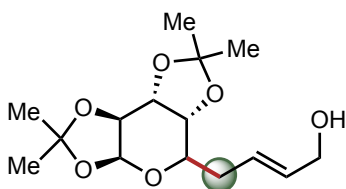

(*E*)-4-((3a*S*,5*R*,5a*R*,8a*R*,8b*S*)-2,2,7,7-Tetramethyltetrahydro-5*H*-bis([1,3]dioxolo)[4,5-*b*:4',5'-*d*]pyran-5-yl)but-2-en-1-ol (**2i**)

Prepared according to General Procedure C. The reactions were stirred under a fan near blue LED strips. The reaction progression was monitored *via* crude proton NMR and TLC with *para*-anisaldehyde as a stain (brown after heating). After 16 h, the reaction mixture was concentrated on Celite and purified by silica gel column chromatography (0 to 60% EtOAc/hexanes over 20 min).

**Physical state:** 76% yield, *E/Z* = >20:1, clear oil.

**<sup>1</sup>H NMR** (500 MHz, CDCl<sub>3</sub>) δ 5.85 – 5.68 (m, 2H), 5.21 (d, *J* = 2.5 Hz, 1H), 4.50 (d, *J* = 5.4 Hz, 1H), 4.21 (d, *J* = 2.4 Hz, 1H), 4.11 (m, 2H), 3.92 (dd, *J* = 9.6, 5.4 Hz, 1H), 3.23 (ddd, *J* = 10.2, 7.6, 3.5 Hz, 1H), 2.52 – 2.48 (m, 1H), 2.26 (dt, *J* = 14.1, 6.8 Hz, 1H), 1.52 (s, 3H), 1.44 (s, 3H), 1.38 (s, 3H), 1.35 (s, 3H).

**<sup>13</sup>C NMR** (126 MHz, CDCl<sub>3</sub>) δ 132.0, 128.2, 110.9, 108.9, 97.0, 76.1, 74.5, 73.0, 72.9, 63.8, 34.5, 28.2, 28.2, 26.1, 25.9.

**HRMS (ES<sup>+</sup>)** *m/z* calc. for C<sub>15</sub>H<sub>24</sub>O<sub>6</sub> [M<sup>+</sup>] 300.1573, found 300.1586.

**FT-IR** (cm<sup>-1</sup>, neat, ATR) 3443, 2987, 2936, 1727, 1383, 1371, 1238, 1220, 1164, 1143, 1090, 1065, 860, 515.

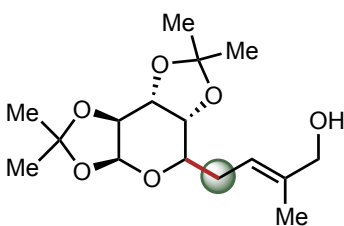

(*E*)-2-Methyl-4-((3*aS*,5*R*,5*aR*,8*aR*,8*bS*)-2,2,7,7-tetramethyltetrahydro-5H-bis([1,3]dioxolo)[4,5-*b*:4',5'-*d*]pyran-5-yl)but-2-en-1-ol (**2j**)

Prepared according to General Procedure C. The reactions were stirred under a fan near blue LED strips. The reaction progression was monitored *via* crude proton NMR and TLC with *para*-anisaldehyde as a stain (dark blue after heating). After 16 h, the reaction mixture was concentrated on Celite and purified by silica gel column chromatography (0 to 40% EtOAc/hexanes over 20 min).

**Physical state:** 76% yield, *E/Z* = 89:11, clear oil.

**<sup>1</sup>H NMR** (500 MHz, CDCl<sub>3</sub>) δ 5.53 (d, *J* = 5.1 Hz, 1H), 5.47 (t, *J* = 7.1 Hz, 1H), 4.58 (dd, *J* = 7.9, 2.4 Hz, 1H), 4.29 (dd, *J* = 5.1, 2.3 Hz, 1H), 4.14 (m, 1H), 4.02 (m, 2H), 3.75 (t, *J* = 7.1 Hz, 1H), 2.43 – 2.34 (m, 2H), 1.70 (s, 3H), 1.51 (s, 3H), 1.47 (s, 3H), 1.35 (s, 3H), 1.33 (s, 3H).

**<sup>13</sup>C NMR** (126 MHz, CDCl<sub>3</sub>) δ 137.7, 121.3, 109.2, 108.5, 96.7, 72.4, 71.0, 70.7, 68.9, 67.6, 28.8, 26.2, 26.2, 25.1, 24.6, 14.0.

**HRMS (ES<sup>+</sup>)** *m/z* calc. for C<sub>16</sub>H<sub>26</sub>O<sub>6</sub> [M<sup>+</sup>] 314.1729, found 314.1706.

**FT-IR** (cm<sup>-1</sup>, neat, ATR) 3426, 2986, 2936, 1725, 1382, 1255, 1212, 1167, 1068, 999, 918, 513.

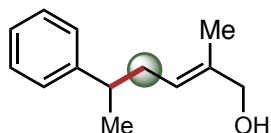

**(E)-2-Methyl-5-phenylhex-2-en-1-ol (2k)**

Prepared according to General Procedure C. The reactions were stirred under a fan near blue LED strips. The reaction progression was monitored *via* crude proton NMR and TLC with *para*-anisaldehyde as a stain (dark blue after heating). After 16 h, the reaction mixture was concentrated on Celite and purified by silica gel column chromatography (0 to 45% EtOAc/hexanes over 20 min).

**Physical state:** 85% yield, *E/Z* = 90:10, clear oil.

**<sup>1</sup>H NMR** (500 MHz, CDCl<sub>3</sub>) δ 7.29 (t, *J* = 7.6 Hz, 2H), 7.22 – 7.16 (m, 3H), 5.38 (t, *J* = 7.3 Hz, 1H), 4.03 – 3.89 (m, 2H), 2.78 (q, *J* = 7.1 Hz, 1H), 2.32 (q, *J* = 6.9 Hz, 2H), 1.61 (s, 3H), 1.27 (d, *J* = 6.9 Hz, 3H).

**<sup>13</sup>C NMR** (126 MHz, CDCl<sub>3</sub>) δ 147.3, 136.0, 128.4, 127.1, 126.1, 124.7, 69.1, 40.2, 36.5, 21.7, 13.9.

**HRMS (ES+)** *m/z* calc. for C<sub>13</sub>H<sub>18</sub>O [M<sup>+</sup>] 190.1358, found 190.1350.

**FT-IR** (cm<sup>-1</sup>, neat, ATR) 3339, 3061, 3027, 2960, 2926, 2871, 1723, 1602, 1493, 1452, 1376, 1271, 1224, 1075, 1010.

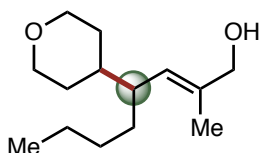

**(E)-2-Methyl-4-(tetrahydro-2H-pyran-4-yl)oct-2-en-1-ol (2l)**

Prepared according to General Procedure C. The reactions were stirred under a fan near blue LED strips. The reaction progression was monitored *via* crude proton NMR and TLC with *para*-anisaldehyde as a stain (dark purple after heating). After 16 h, the reaction mixture was concentrated on Celite and purified by silica gel column chromatography (0 to 40% EtOAc/hexanes over 20 min).

**Physical state:** 49% yield, *E/Z* = 84:16, clear oil.

**<sup>1</sup>H NMR** (500 MHz, CDCl<sub>3</sub>) δ 5.16 (d, *J* = 10.4 Hz, 1H), 4.06 – 4.02 (m, 2H), 3.99 – 3.94 (m, 2H), 3.35 (dd, *J* = 19.6, 10.4 Hz, 2H), 2.16 – 2.09 (m, 1H), 1.83 (d, *J* = 7.3 Hz, 1H), 1.66 (s, 3H), 1.49 – 1.42 (m, 2H), 1.32 (d, *J* = 7.0 Hz, 2H), 1.28 – 1.23 (m, 4H), 1.16 – 1.11 (m, 2H), 0.89 – 0.87 (m, 3H).

**<sup>13</sup>C NMR** (126 MHz, CDCl<sub>3</sub>) δ 135.81, 129.05, 69.19, 68.57, 42.79, 39.93, 31.90, 31.29, 30.25, 29.67, 23.08, 14.24.

**HRMS (ES+)** m/z calc. for C<sub>14</sub>H<sub>26</sub>O<sub>2</sub> [M<sup>+</sup>] 226.1933, found 226.1943.

**FT-IR** (cm<sup>-1</sup>, neat, ATR) 3388, 2930, 2856, 1729, 1457, 1378, 1239, 1092, 1015, 860.

**General Procedure: Alkylation of Allyl Bromides with 1,4-Dihydropyridines  
(Procedure D)**

To a 8.0 mL reaction vial, 4CzIPN (3.9 mg, 0.005 mmol, 2 mol %), [Ni(dtbbpy)(H<sub>2</sub>O)<sub>4</sub>]Cl<sub>2</sub> (3.6 mg, 0.008 mmol, 3 mol %), and 1,4-dihydropyridine (0.25 mmol, 1.0 equiv) were added. The vial was capped, purged, and evacuated three times. Under N<sub>2</sub>, dry degassed acetone (2.5 mL, 0.1 M) and allyl bromide (0.50 mmol, 2.0 equiv) were added. The reactions were stirred blue LED strips (see pictures below) for 16 h. The reaction mixture was quenched with saturated NaHCO<sub>3</sub> (10 mL) and extracted with EtOAc (3 x 10 mL). The organic extracts were combined and concentrated on Celite. The crude mixture was purified by silica gel column chromatography. All reported E/Z ratios were determined by crude <sup>1</sup>H NMR.

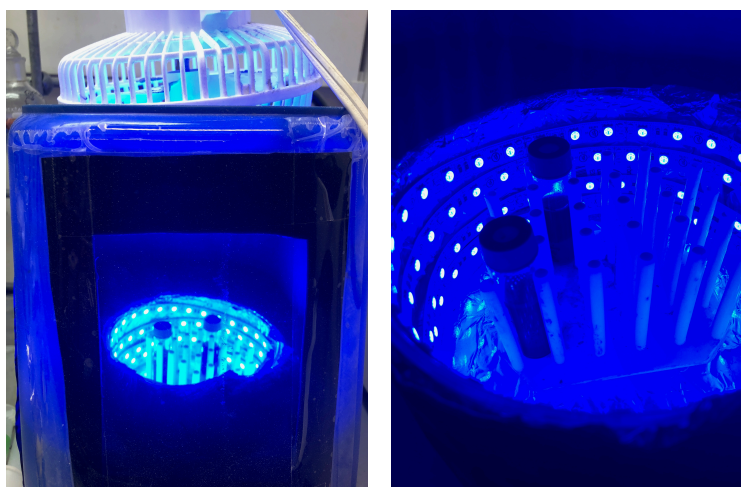

**Figure 2.** Reaction set up with blue LED strips.<sup>1</sup>

<sup>1</sup> For details on photoreactor setup, see: Lin, K.; Wiles, R. J.; Kelly, C. B.; Davies, G. H. M.; Molander, G. A. *ACS Catal.* **2017**, *7*, 5129–6323.

## Compound Characterization

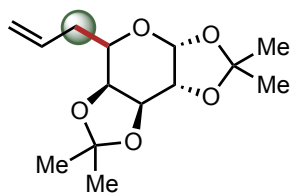

(3aR,5R,5aS,8aS,8bR)-5-Allyl-2,2,7,7-tetramethyltetrahydro-5H-bis[[1,3]dioxolo][4,5-b:4',5'-d]pyran (**4a**)

Prepared according to General Procedure D. The reactions were stirred under a fan near blue LED strips. The reaction progression was monitored *via* crude proton NMR and TLC with  $\text{KMnO}_4$ . The crude mixture was purified by silica gel column chromatography (0 to 40% EtOAc/hexanes over 20 min).

**Physical state:** 70% yield,  $dr = >20:1$ , clear oil.

**$^1\text{H NMR}$**  (500 MHz,  $\text{CDCl}_3$ )  $\delta$  5.90 (ddt,  $J = 17.1, 10.2, 6.9$  Hz, 1H), 5.22 (d,  $J = 2.5$  Hz, 1H), 5.18 – 5.05 (m, 2H), 4.50 (d,  $J = 5.4$  Hz, 1H), 4.21 (d,  $J = 2.4$  Hz, 1H), 3.94 (dd,  $J = 9.6, 5.4$  Hz, 1H), 3.29 – 3.20 (m, 1H), 2.56 – 2.45 (m, 1H), 2.27 (dt,  $J = 14.6, 7.2$  Hz, 1H), 1.52 (s, 3H), 1.45 (s, 3H), 1.38 (s, 3H), 1.35 (s, 3H).

**$^{13}\text{C NMR}$**  (126 MHz,  $\text{CDCl}_3$ )  $\delta$  134.0, 117.6, 110.9, 108.8, 97.0, 76.0, 74.4, 72.9, 72.8, 36.0, 28.2, 28.2, 26.1, 25.9.

**HRMS (ES<sup>+</sup>)**  $m/z$  calc. for  $\text{C}_{14}\text{H}_{22}\text{O}_5$  [ $\text{M}^+$ ] 270.1467, found 270.1480.

**FT-IR** ( $\text{cm}^{-1}$ , neat, ATR) 2987, 2937, 1382, 1370, 1282, 1236, 1218, 1165, 1122, 1062, 1040, 859.

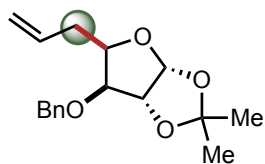

(3aR,5R,6S,6aR)-5-Allyl-6-(benzyloxy)-2,2-dimethyltetrahydrofuro[2,3-d][1,3]dioxole (**4b**)

Prepared according to General Procedure D. The reactions were stirred under a fan near blue LED strips. The reaction progression was monitored *via* crude proton NMR and TLC with potassium permanganate. The crude mixture was purified by silica gel column chromatography (0 to 40% EtOAc/hexanes over 20 min).

**Physical state:** 57% yield,  $dr = 80:20$ , clear oil.

**$^1\text{H NMR}$**  (500 MHz,  $\text{CDCl}_3$ )  $\delta$  5.91 (d,  $J = 3.7$  Hz, 1H), 5.91 – 5.65 (m, 4H), 5.57 (d,  $J = 10.2$  Hz, 1H), 5.04 (td,  $J = 9.9, 6.1$  Hz, 2H), 4.63 (dd,  $J = 14.4, 3.3$  Hz, 2H), 4.37 (m, 1H),

3.74 – 3.66 (m, 1H), 3.59 (m, 1H), 2.88 – 2.75 (m, 1H), 2.18 (m, 2H), 1.46 (d,  $J = 7.1$  Hz, 3H), 1.33 (s, 3H) (mixtures of diastereomers).

$^{13}\text{C}$  NMR (126 MHz,  $\text{CDCl}_3$ )  $\delta$  135.8, 135.8, 131.9, 130.3, 128.6, 128.0, 126.9, 124.1, 124.0, 116.9, 113.0, 112.4, 106.6, 91.1, 90.4, 85.9, 85.4, 84.9, 84.7, 77.9, 77.7, 76.9, 49.0, 49.0, 40.3, 40.1, 36.3, 36.0, 27.5, 27.0, 26.9 (mixtures of diastereomers).

**HRMS (ES+)**  $m/z$  calc. for  $\text{C}_{17}\text{H}_{22}\text{O}_4$  [ $\text{M}^+$ ] 290.1518, found 290.1514.

**FT-IR** ( $\text{cm}^{-1}$ , neat, ATR) 2981, 2937, 1641, 1456, 1373, 1216, 1164, 1079, 1024, 912, 752.

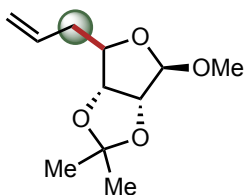

(3a*R*,4*R*,6*R*,6a*R*)-4-Allyl-6-methoxy-2,2-dimethyltetrahydrofuro[3,4-*d*][1,3]dioxole (**4c**)

Prepared according to General Procedure D. The reactions were stirred under a fan near blue LED strips. The reaction progression was monitored *via* crude proton NMR and TLC with  $\text{KMnO}_4$ . The crude mixture was purified by silica gel column chromatography (0 to 35% EtOAc/hexanes over 20 min).

**Physical state:** 94% yield,  $dr = >20:1$ , clear oil.

$^1\text{H}$  NMR (500 MHz,  $\text{CDCl}_3$ )  $\delta$  5.81 (ddt,  $J = 17.1, 10.3, 6.8$  Hz, 1H), 5.18 – 5.08 (m, 2H), 4.96 (s, 1H), 4.61 (d,  $J = 6.0$  Hz, 1H), 4.57 (d,  $J = 6.0$  Hz, 1H), 4.23 (t,  $J = 7.8$  Hz, 1H), 3.34 (s, 3H), 2.42 (dt,  $J = 14.0, 6.8$  Hz, 1H), 2.32 – 2.26 (m, 1H), 1.48 (s, 3H), 1.31 (s, 3H).

$^{13}\text{C}$  NMR (126 MHz,  $\text{CDCl}_3$ )  $\delta$  134.5, 117.7, 112.4, 109.6, 86.6, 85.7, 83.6, 55.0, 39.6, 26.6, 25.2.

**HRMS (ES+)**  $m/z$  calc. for  $\text{C}_{11}\text{H}_{18}\text{O}_4$  [ $\text{M}^+$ ] 214.1205, found 214.1220.

**FT-IR** ( $\text{cm}^{-1}$ , neat, ATR) 2988, 2938, 2834, 1643, 1442, 1373, 1272, 1241, 1211, 1107, 1093, 870.

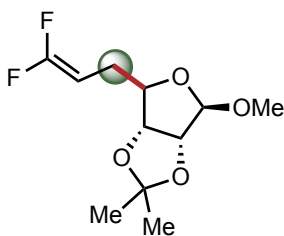

(3a*R*,4*R*,6*R*,6a*R*)-4-(3,3-Difluoroallyl)-6-methoxy-2,2-dimethyltetrahydrofuro[3,4-*d*][1,3]dioxole (**4d**)



Prepared according to General Procedure D. The reactions were stirred under a fan near blue LED strips. The reaction progression was monitored *via* crude proton NMR and TLC with  $\text{KMnO}_4$ . The crude mixture was purified by silica gel column chromatography (0 to 25% EtOAc/hexanes over 20 min).

**Physical state:** 94% yield,  $dr = >20:1$ , clear oil.

**$^1\text{H NMR}$**  (500 MHz,  $\text{CDCl}_3$ )  $\delta$  4.96 (s, 1H), 4.61 (d,  $J = 5.9$  Hz, 1H), 4.52 (d,  $J = 5.9$  Hz, 1H), 4.30 – 4.06 (m, 2H), 3.34 (s, 3H), 2.26 (m, 2H), 1.47 (s, 3H), 1.32 (s, 3H).

**$^{13}\text{C NMR}$**  (126 MHz,  $\text{CDCl}_3$ )  $\delta$  157.0 (dd,  $J = 286.9$  Hz), 112.6, 109.7, 86.5, 85.6, 83.6, 74.7 (dd,  $J = 24.2, 20.4$  Hz), 55.1, 28.4, 26.6, 25.16.

**$^{19}\text{F NMR}$**  (471 MHz,  $\text{C}_6\text{D}_6$ )  $\delta$  -87.07 (d,  $J = 44.3$  Hz), -89.46 (d,  $J = 43.5$  Hz).

**HRMS (ES+)**  $m/z$  calc. for  $\text{C}_{11}\text{H}_{16}\text{F}_2\text{O}_4$  [ $\text{M}^+$ ] 250.1017, found 250.1029.

**FT-IR** ( $\text{cm}^{-1}$ , neat, ATR) 2991, 2939, 1747, 1374, 1345, 1308, 1275, 1260, 1211, 1185, 1107, 1093, 869.

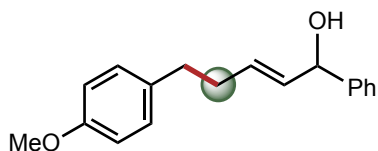

5-(4-methoxyphenyl)-1-phenylpent-2-en-1-ol (**5a**)

Prepared according to General Procedure A. To maintain the reaction temperature at 60 °C, the blue LED bay was covered with aluminum foil, and the temperature was periodically checked with a digital temperature sensor. After 16 h, the reaction mixture was quenched with saturated  $\text{NaHCO}_3$  (15 mL) and extracted with EtOAc (3 x 15 mL). The organic extracts were combined and concentrated on Celite. The crude mixture was purified by silica gel column chromatography (0 to 40% EtOAc/hexanes over 20 min).

**$^1\text{H NMR}$**  (500 MHz,  $\text{CDCl}_3$ ):  $\delta$  (Major isomer)  $\delta$  7.35 – 7.33 (m, 3H), 7.31 – 7.23 (m, 2H), 7.08 (d,  $J = 8.4$  Hz, 2H), 6.82 (d,  $J = 8.3$  Hz, 2H), 5.82 – 5.73 (m, 1H), 5.71 – 5.64 (m, 1H), 5.16 (d,  $J = 6.7$  Hz, 1H), 3.79 (s, 3H), 2.69 – 2.66 (m, 2H), 2.40 – 2.32 (m, 2H), 1.88 (br, OH).

**$^{13}\text{C NMR}$**  (125 MHz,  $\text{CDCl}_3$ ):  $\delta$  (Major isomer) 158.0, 143.39, 133.9, 133.1, 131.8, 129.5, 128.6, 127.7, 126.3, 113.9, 75.2, 55.4, 34.7, 34.3. (Minor isomer) 158.1, 133.7, 133.0, 131.1, 129.7, 127.5, 126.0, 114.0, 69.7, 34.9, 30.0.

**FT-IR** ( $\text{cm}^{-1}$ , neat, ATR) 3402, 1611, 1511, 1244, 700.

**HRMS** (EI)  $m/z$ : Calcd for  $\text{C}_{18}\text{H}_{20}\text{O}_2$  [ $\text{M}$ ] 268.1463. Found, 268.1479.

## Computational Studies

### Details about computational methods.

All optimizations of intermediates and transition state structures were carried out in the gas phase without constraints using spin-unrestricted broken symmetry (hybrid) DFT using UB3LYP<sup>i</sup>/6-31G(d) method with the “opt=noeigen” and “guess=mix” keywords as implemented in Gaussian09.<sup>ii</sup> Frequency calculations were performed at the same level to determine vibrational frequencies, obtain thermal corrections to enthalpy ( $H_{\text{correction}}$ ) and free energy ( $G_{\text{correction}}$ ) at 298K, and to determine whether the optimized structures were transition states (if there existed only a single imaginary frequency) or intermediates (if no imaginary frequencies were found). Exhaustive conformational searches were performed for all structures to elucidate the lowest energy profiles, To refine the energies, we performed single point energy calculations on optimized geometries using implicit solvent (water;  $\epsilon = 78.3553$ ) with SMD<sup>iii</sup> as the solvation model in combination with the UM06 functional<sup>iv</sup> and the 6-311+G(d,p) basis set. For comparison, we also computed single point energies using D3 dispersion correction of Grimme et al. with UB3LYP (i.e., UB3LYP-D3)<sup>v</sup> and the UM06 functionals in combination the 6-311+G(d,p) basis set in solvent (water) using the SMD solvation model. Finally, for comparison, we also performed open-shell domain-based local pair natural orbital Coupled-Cluster calculations using single and double excitations with perturbative triple excitations (DLPNO-CCSD(T)) with def2-TZVPP basis set<sup>vi</sup> and def2-TZVPP/C auxiliary basis set<sup>vii</sup> were performed on the lowest energy pathways using ORCA software<sup>viii</sup> with the “NormalPNO” and “SlowConv” keywords. The total free energies using this method was computed as followed:  $G = E^{\text{DLPNO-CCSD(T)}} + G_{\text{thermal corrections}}^{\text{UB3LYP}} + \Delta G_{\text{solvation}}^{\text{UB3LYP-D3}}$  where  $\Delta G_{\text{solvation}}^{\text{UB3LYP}} = E^{\text{UB3LYP-D3/6-311+G(d,p)-SMD(water)}} - E^{\text{UB3LYP-D3/6-311+G(d,p)-gas}}$  This method provides accurate energies (within 3 kJ mol<sup>-1</sup>) with the computational cost comparable to DFT calculations<sup>ix</sup> and has been used to study organometallic reaction mechanisms<sup>x</sup>. All structural figures were generated using CYLview<sup>xi</sup> (in manuscript) and GaussView 5<sup>iv</sup> (supporting information)

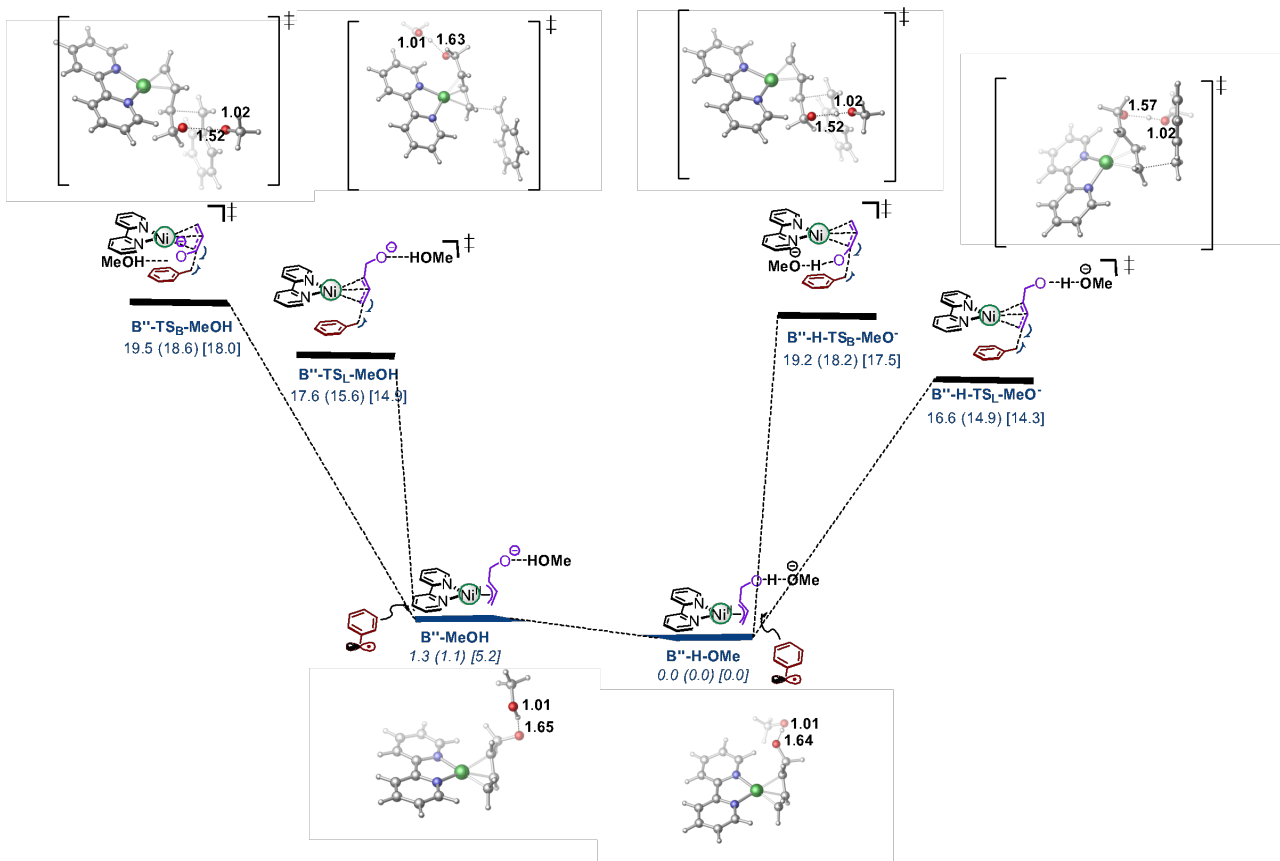

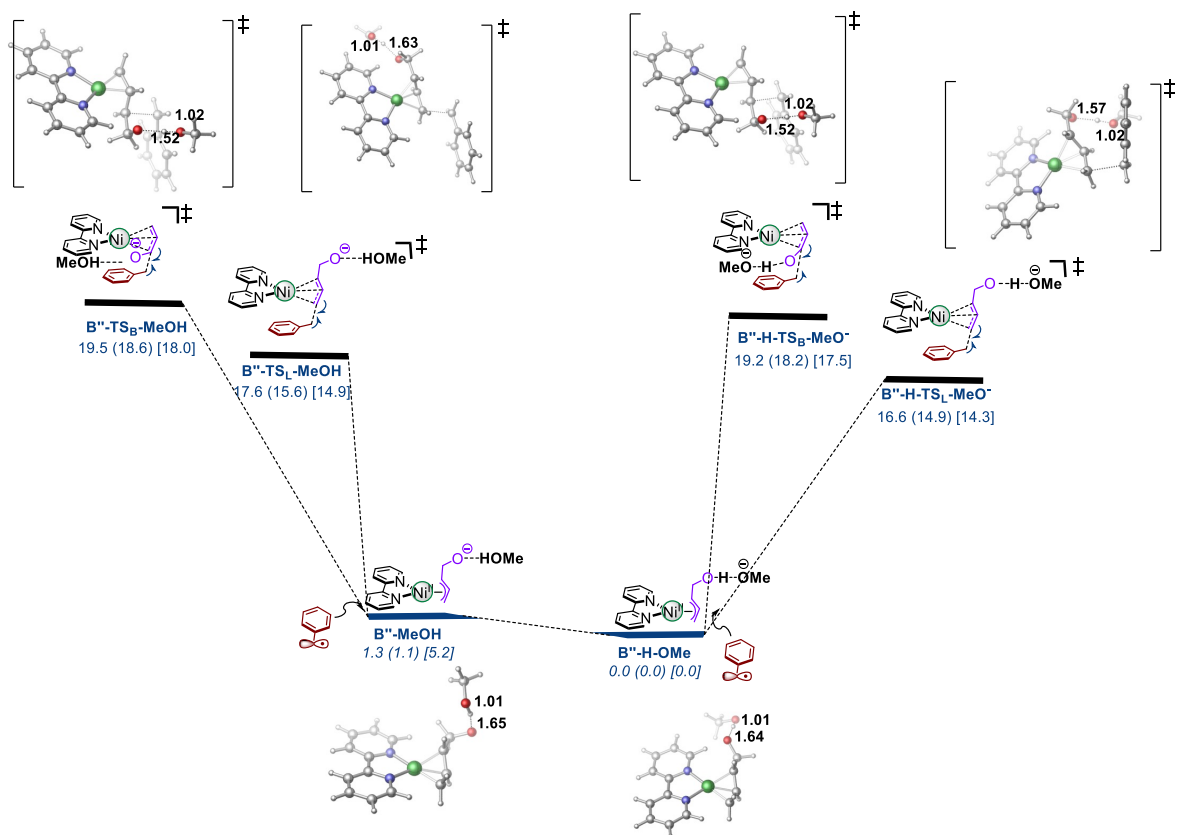

**Figure SC1.** Protonated outer-sphere transition states leading to the branched and linear products computed at the UM06/6-311+G(d,p)-SMD(water)//UB3LYP/6-31G(d)-gas, UB3LYP-D3/6-311+G(d,p)-SMD(water)//UB3LYP/6-31G(d)-gas (parenthesis) and DLPNO-CCSD(T)/def2-TZVPP-SMD(water)//UB3LYP/6-31G(d)-gas (brackets) levels.

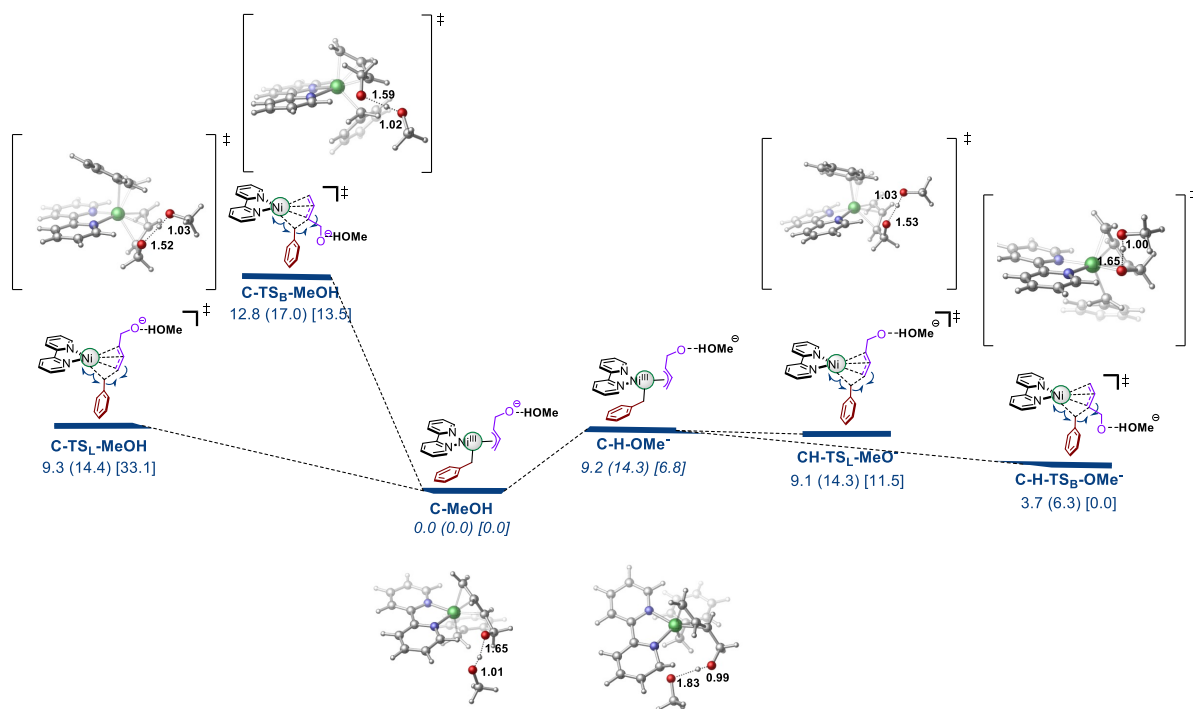

**Figure SC2.** Protonated inner sphere transition states leading to the branched and linear products computed at the UM06/6-311+G(d,p)-SMD(water)//UB3LYP/6-31G(d)-gas, UB3LYP-D3/6-311+G(d,p)-SMD(water)//UB3LYP/6-31G(d)-gas (parenthesis) and DLPNO-CCSD(T)/def2-TZVPP-SMD(water)//UB3LYP/6-31G(d)-gas (brackets) levels.

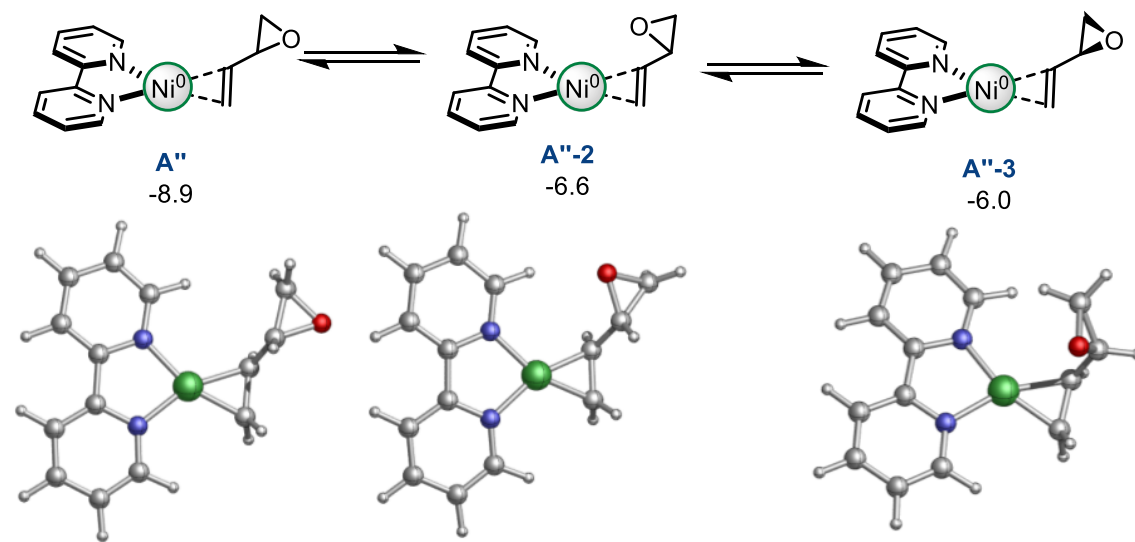

**Figure SC3.** Conformers of A'' with relative free energies computed at the UM06/6-311+g(d,p)-SMD-water//UB3LYP/6-31G(d)-gas level.

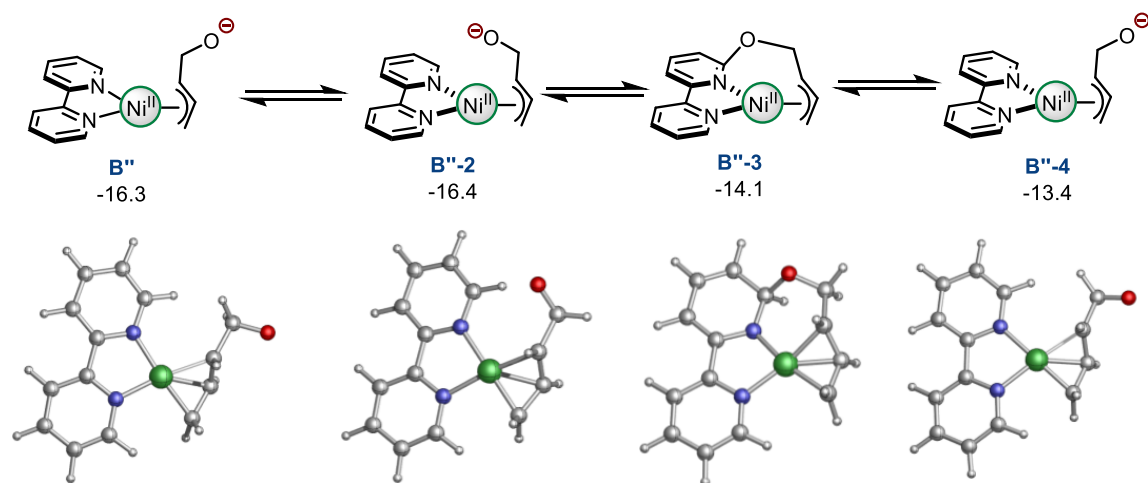

**Figure SC4.** Conformers of B'' with relative free energies computed at the UM06/6-311+g(d,p)-SMD-water//UB3LYP/6-31G(d)-gas level.

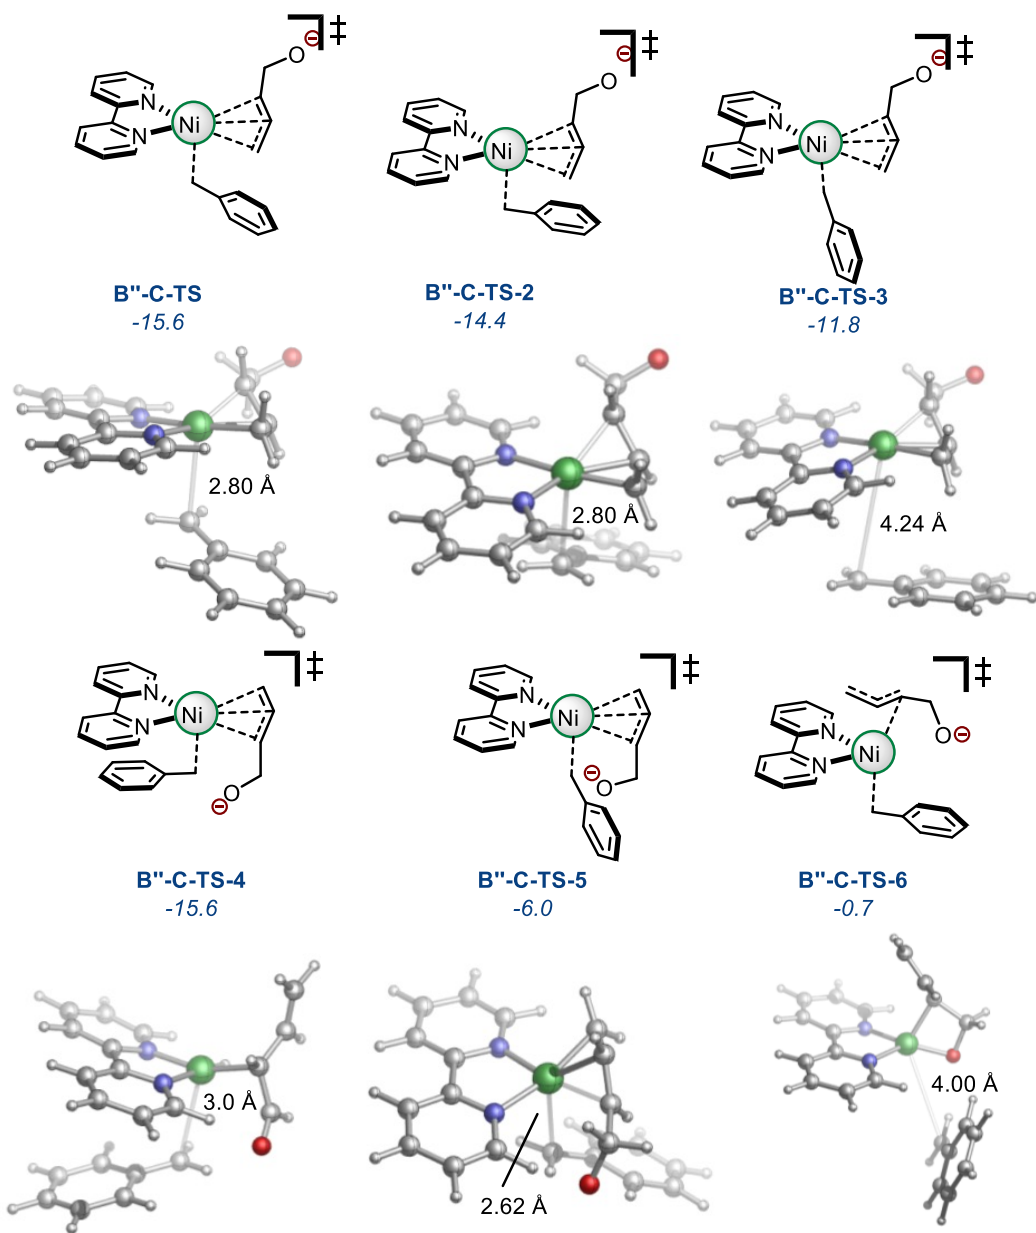

**Figure SC5.** Conformers of B''-C-TS. Free energies computed at the UM06/6-311+g(d,p)-SMD-water//UB3LYP/6-31G(d)-gas level.

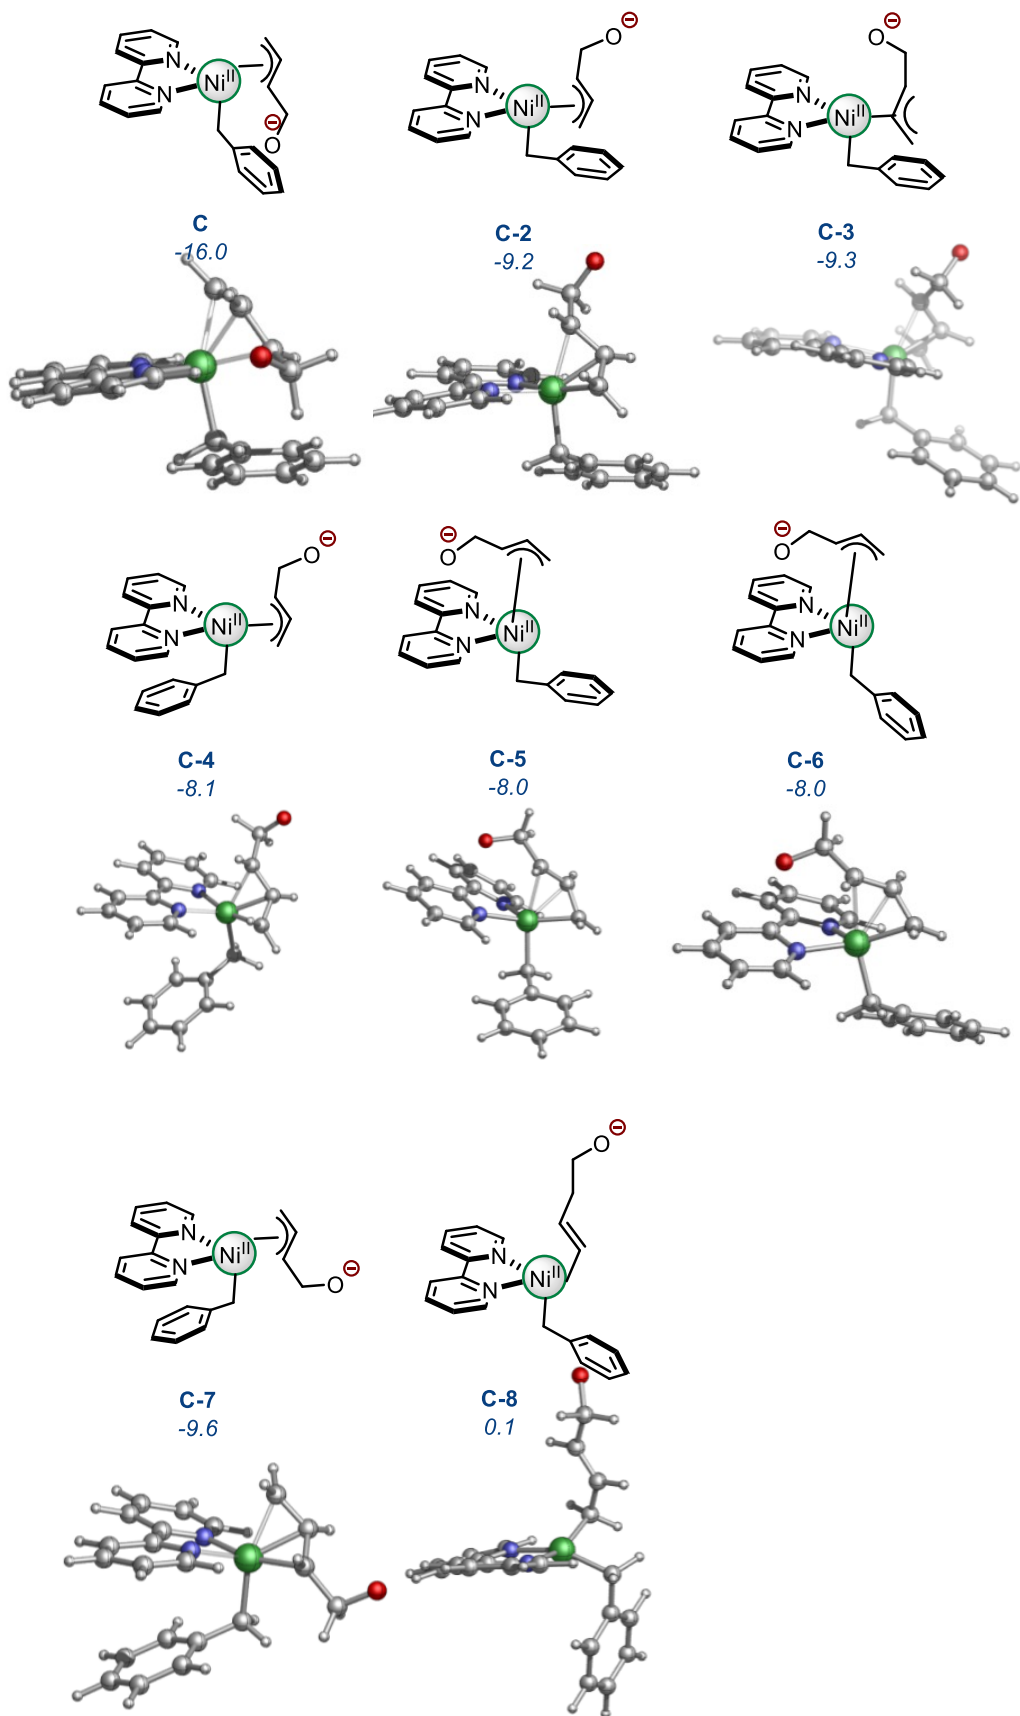



**Figure SC6.** Conformers of C. Free energies computed at the UM06/6-311+g(d,p)-SMD-water//UB3LYP/6-31G(d)-gas level.

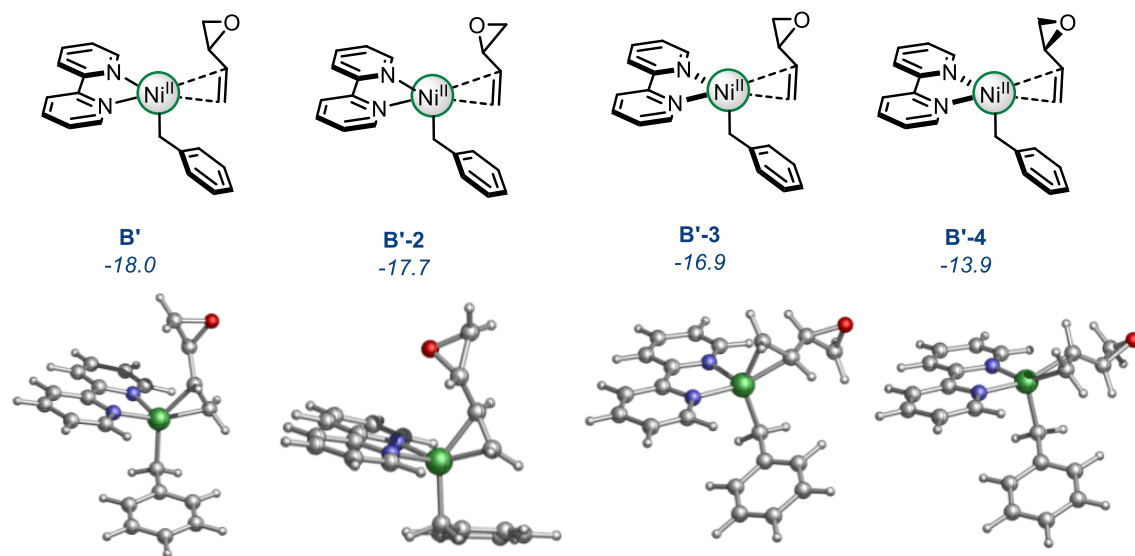

**Figure SC7.** Conformers of B'. Free energies computed at the UM06/6-311+g(d,p)-SMD-water//UB3LYP/6-31G(d)-gas level.

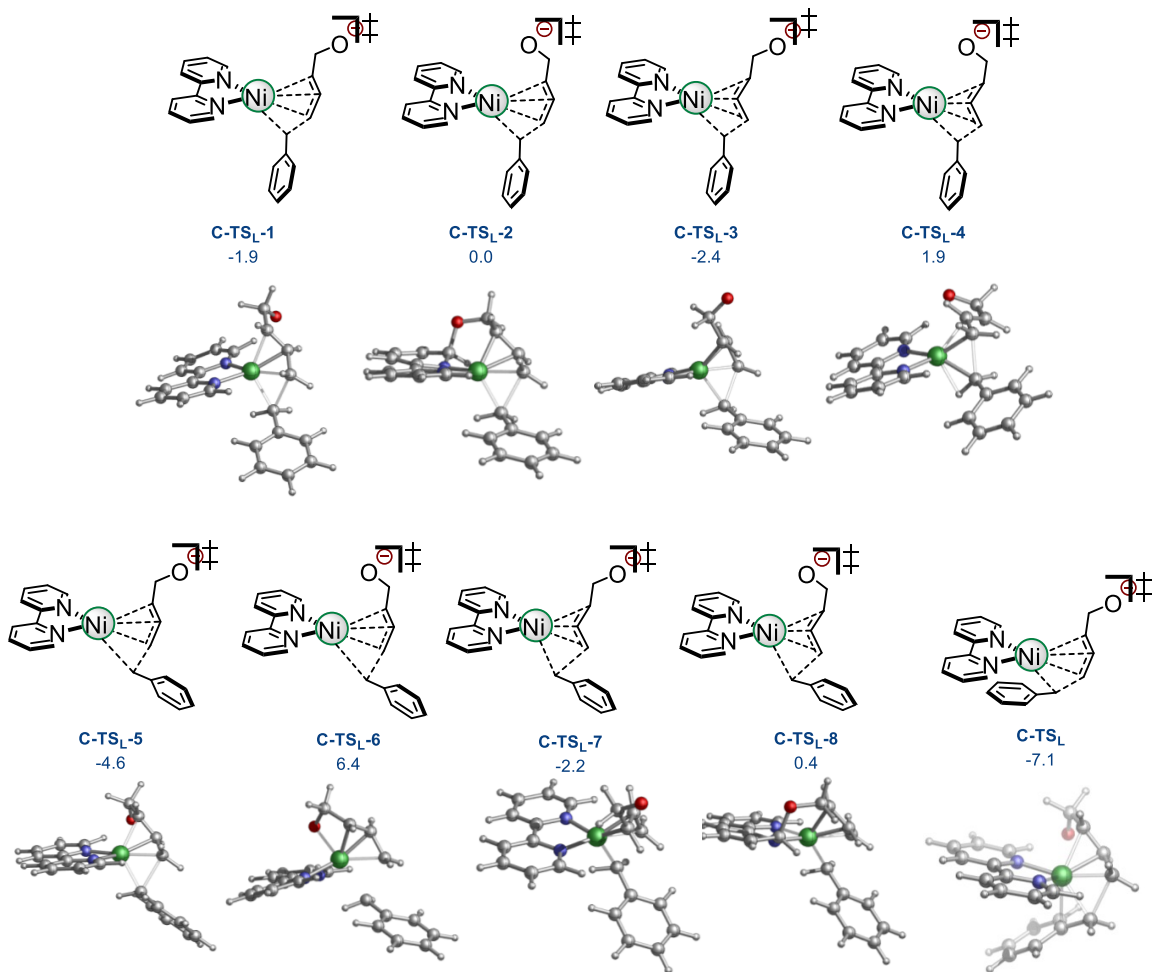

**Figure SC8.** Conformers of C-TS<sub>L</sub> with relative free energies computed at the UM06/6-311+g(d,p)-SMD-water//UB3LYP/6-31G(d)-gas level.

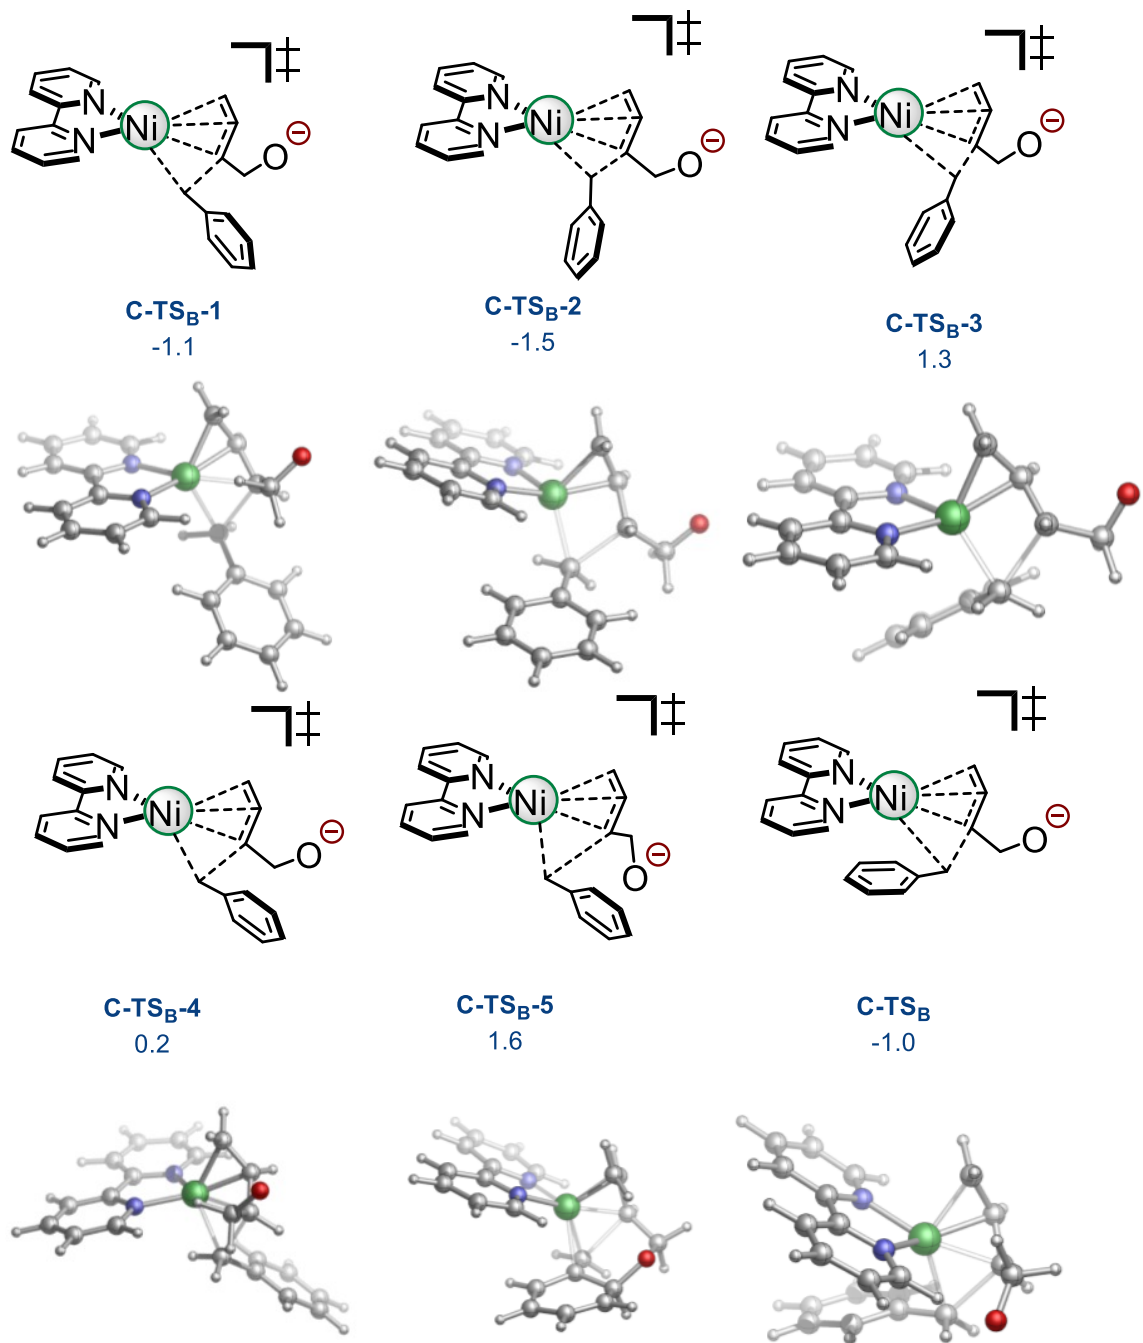

**Figure SC9.** Conformers of C-TS<sub>B</sub> with relative free energies computed at the UM06/6-311+g(d,p)-SMD-water//UB3LYP/6-31G(d)-gas level.

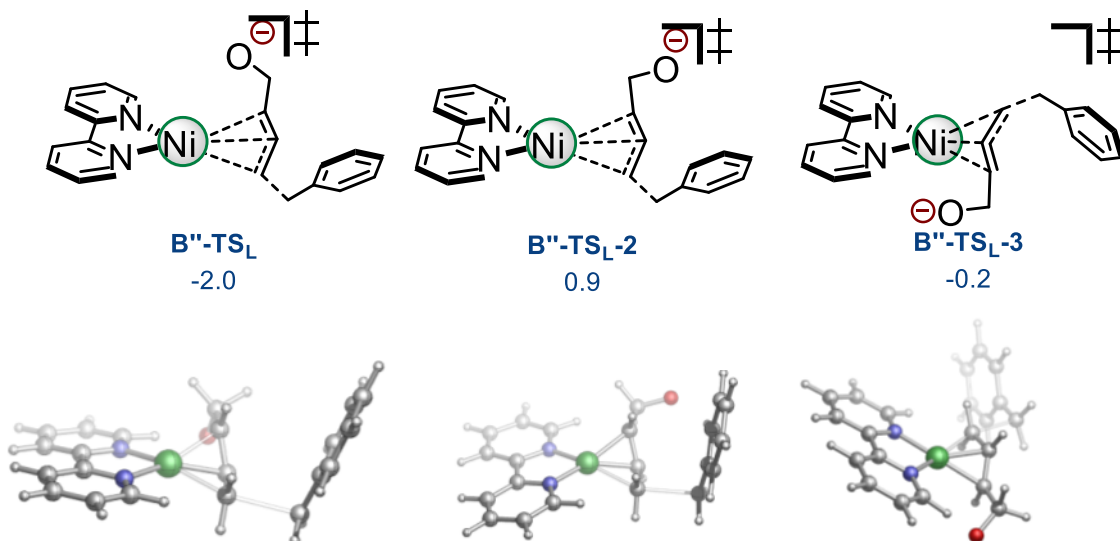

**Figure S10.** Conformers of C-TS<sub>B</sub> with relative free energies computed at the UM06/6-311+g(d,p)-SMD-water//UB3LYP/6-31G(d)-gas level.

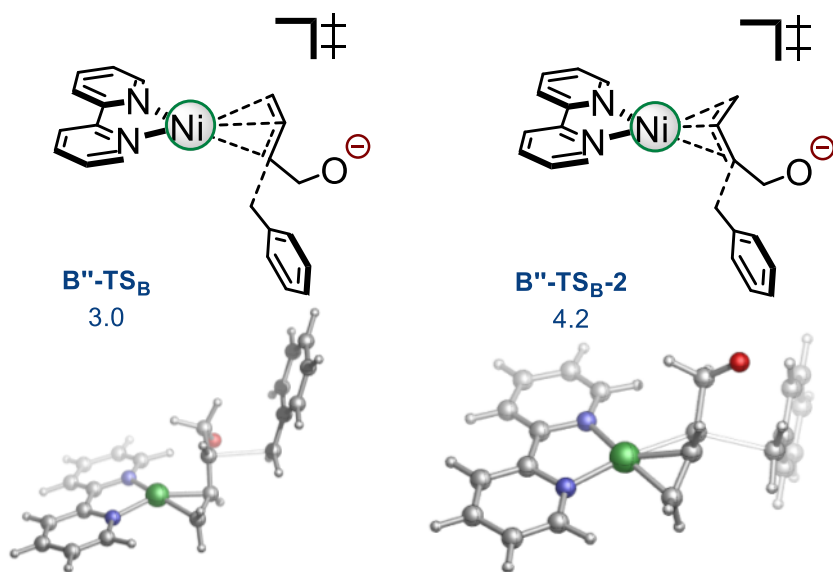

**Figure SC11.** Conformers of C-TS<sub>B</sub> with relative free energies computed at the UM06/6-311+g(d,p)-SMD-water//UB3LYP/6-31G(d)-gas level.

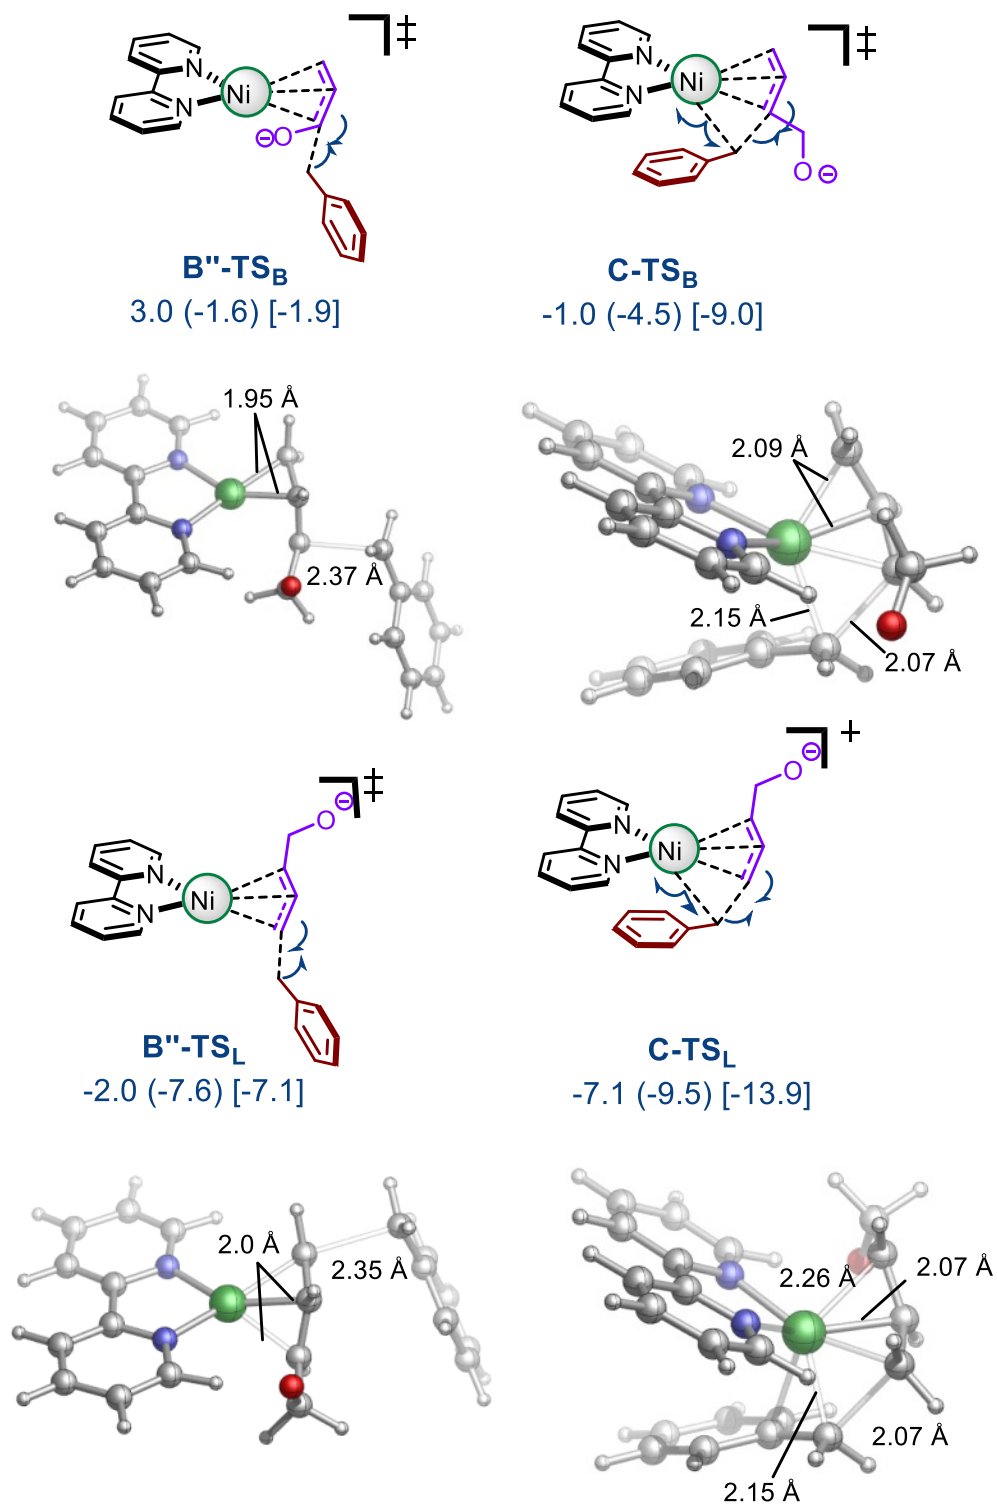

**Figure SC12.** Conformers of inner and outer sphere reductive elimination transition states with relative free energies computed at the UM06/6-311+g(d,p)-SMD-water//UB3LYP/6-31G(d)-gas, UB3LYP-D3/6-311+g(d,p)-SMD-water//UB3LYP/6-31G(d)-gas, (parenthesis) and DLPNO-CCSD(T)/def2-TZVPP (brackets) levels.

## Coordinates and energies

A'

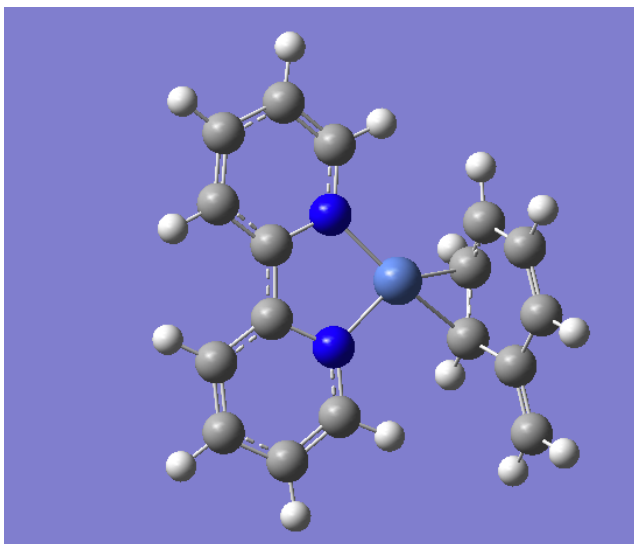

UB3LYP/6-31g(d)-gas

Zero-point correction= 0.276831 (Hartree/Particle)

Thermal correction to Energy= 0.293478

Thermal correction to Enthalpy= 0.294422

Thermal correction to Gibbs Free Energy= 0.231429

Sum of electronic and zero-point Energies= -2274.226213

Sum of electronic and thermal Energies= -2274.209566

Sum of electronic and thermal Enthalpies= -2274.208622

Sum of electronic and thermal Free Energies= -2274.271616

UM06/6-311+g(d,p)-SMD-water//UB3LYP/6-31G(d)-gas

HF=-2274.1583862

UB3LYP-D3/6-311+g(d,p)-SMD-water//UB3LYP/6-31G(d)-gas

HF=-2274.8877466

DLPNO-CCSD(T)/def2-TZVPP//uB3LYP/6-31G(d)-gas

HF = -2272.472168063574

$\Delta G_{\text{solv}} = -0.0056383$

A-TS

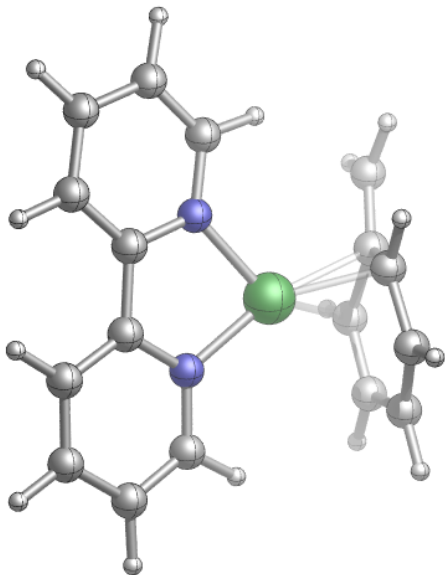

A-TS

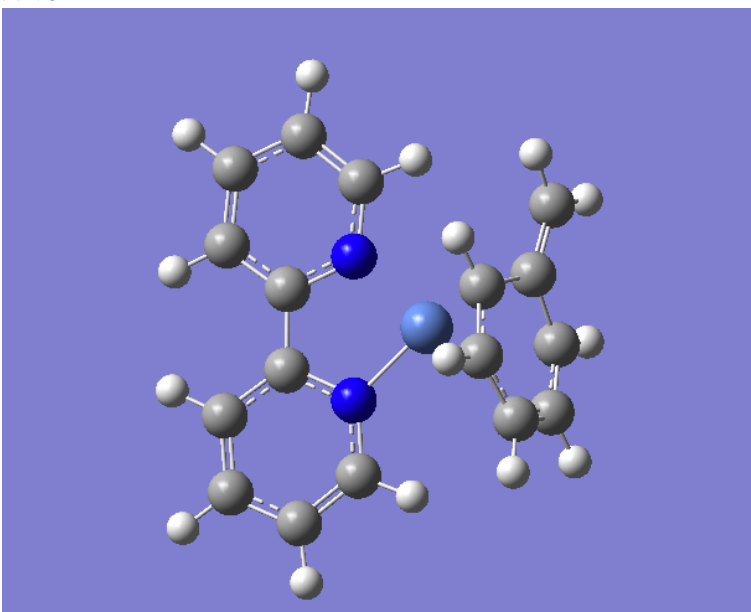

UB3LYP/6-31g(d)-gas

Imaginary frequency =  $-95.44 \text{ cm}^{-1}$

Zero-point correction= 0.274198 (Hartree/Particle)

Thermal correction to Energy= 0.290971

Thermal correction to Enthalpy= 0.291915

Thermal correction to Gibbs Free Energy= 0.228224

Sum of electronic and zero-point Energies= -2274.210476

Sum of electronic and thermal Energies= -2274.193704

Sum of electronic and thermal Enthalpies= -2274.192759

Sum of electronic and thermal Free Energies= -2274.256450

C -1.45189 2.03439 0.64615

C 0.67761 2.42732 -0.32566

|    |          |          |          |
|----|----------|----------|----------|
| C  | 0.31175  | 3.71701  | -0.72049 |
| C  | -0.99473 | 4.17848  | -0.41376 |
| C  | -1.87174 | 3.33392  | 0.27313  |
| C  | -2.2916  | 1.05112  | 1.32798  |
| C  | -2.38662 | -1.16384 | 2.17232  |
| C  | -3.72767 | -1.01974 | 2.537    |
| C  | -4.36744 | 0.22467  | 2.29653  |
| C  | -3.64418 | 1.25765  | 1.69363  |
| H  | 1.6601   | 2.01724  | -0.53888 |
| H  | 1.02148  | 4.34238  | -1.25216 |
| H  | -1.31177 | 5.17443  | -0.71029 |
| H  | -2.87341 | 3.67357  | 0.51576  |
| H  | -1.84616 | -2.08938 | 2.34594  |
| H  | -4.25663 | -1.84703 | 2.99874  |
| H  | -5.40687 | 0.37283  | 2.57569  |
| H  | -4.12059 | 2.21311  | 1.50003  |
| N  | -0.17001 | 1.59816  | 0.34673  |
| N  | -1.67275 | -0.16146 | 1.58786  |
| Ni | 0.25102  | -0.1573  | 1.13903  |
| C  | 1.92498  | -0.99434 | 2.11151  |
| C  | 1.26732  | -2.10154 | 2.73545  |
| C  | 1.02457  | -3.29735 | 2.05169  |
| C  | 1.48479  | -3.41983 | 0.69751  |
| C  | 2.15816  | -2.38884 | 0.06614  |
| C  | 2.4592   | -1.1257  | 0.74295  |
| H  | 2.28952  | -0.17869 | 2.73528  |
| H  | 0.96138  | -1.99748 | 3.77551  |
| H  | 0.52125  | -4.12749 | 2.53988  |
| H  | 1.30811  | -4.35011 | 0.16002  |
| H  | 2.5192   | -2.51546 | -0.95312 |
| C  | 3.20819  | -0.11799 | 0.12261  |
| H  | 3.59594  | -0.25122 | -0.88413 |
| H  | 3.50334  | 0.78007  | 0.66057  |

UM06/6-311+g(d,p)-SMD-water//UB3LYP/6-31G(d)-gas  
HF=-2274.1527528  
UB3LYP-D3/6-311+g(d,p)-SMD-water//UB3LYP/6-31G(d)-gas  
HF=-2274.8833272  
DLPNO-CCSD(T)/def2-TZVPP//uB3LYP/6-31G(d)-gas  
HF = -2272.466173902212  
 $\Delta G_{\text{solv}} = -0.014615$

B



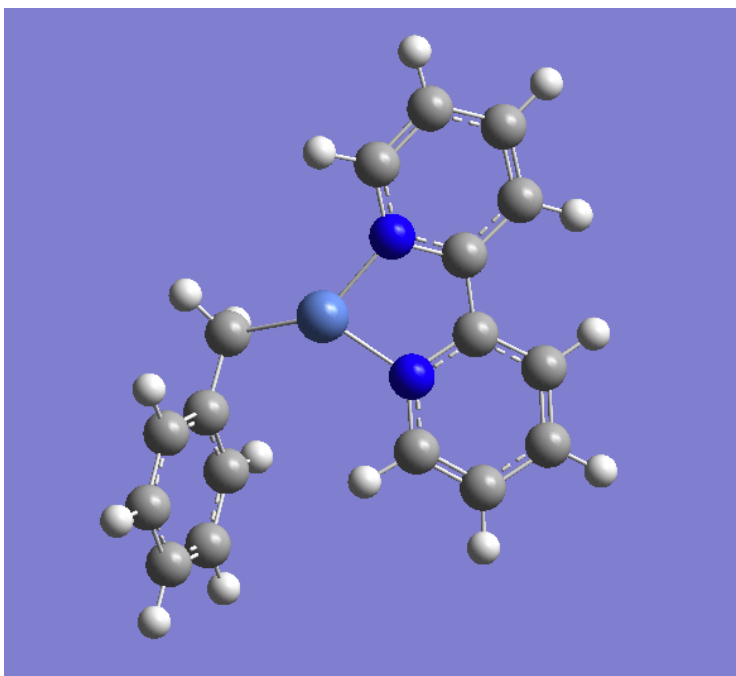

UB3LYP/6-31g(d)-gas

Zero-point correction= 0.114993 (Hartree/Particle)  
 Thermal correction to Energy= 0.120659  
 Thermal correction to Enthalpy= 0.121603  
 Thermal correction to Gibbs Free Energy= 0.085325  
 Sum of electronic and zero-point Energies= -270.800147  
 Sum of electronic and thermal Energies= -270.794481  
 Sum of electronic and thermal Enthalpies= -270.793537  
 Sum of electronic and thermal Free Energies= -270.829815

|   |         |          |          |
|---|---------|----------|----------|
| C | 2.74508 | -1.15846 | -0.78885 |
| C | 3.96616 | -0.54991 | -0.48172 |
| C | 4.44401 | -0.53276 | 0.84965  |
| C | 3.67794 | -1.13642 | 1.87431  |
| C | 2.45538 | -1.74784 | 1.57891  |
| C | 1.94812 | -1.77888 | 0.23416  |
| H | 2.38205 | -1.16936 | -1.81497 |
| H | 4.55387 | -0.08618 | -1.27094 |
| H | 5.39393 | -0.05861 | 1.08397  |
| H | 4.04368 | -1.12389 | 2.89872  |
| H | 1.8698  | -2.21095 | 2.37103  |
| C | 0.70797 | -2.39894 | -0.07206 |
| H | 0.10525 | -2.86798 | 0.70199  |
| H | 0.32508 | -2.42294 | -1.08953 |

UM06/6-311+g(d,p)-SMD-water//UB3LYP/6-31G(d)-gas

HF = -2274.1761005

UB3LYP-D3/6-311+g(d,p)-SMD-water//UB3LYP/6-31G(d)-gas

HF=-2274.9135258

DLPNO-CCSD(T)/def2-TZVPP//uB3LYP/6-31G(d)-gas

HF = -2272.490424211042

$\Delta G_{\text{solv}} = -0.0122301$

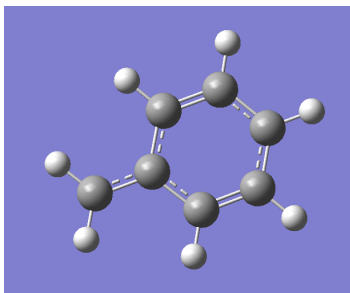

### Ni-Bn-radical

UB3LYP/6-31g(d)-gas

Zero-point correction= 0.114993 (Hartree/Particle)

Thermal correction to Energy= 0.120659

Thermal correction to Enthalpy= 0.121603

Thermal correction to Gibbs Free Energy= 0.085325

Sum of electronic and zero-point Energies= -270.800147

Sum of electronic and thermal Energies= -270.794481

Sum of electronic and thermal Enthalpies= -270.793537

Sum of electronic and thermal Free Energies= -270.829815

|   |         |          |          |
|---|---------|----------|----------|
| C | 2.74508 | -1.15846 | -0.78885 |
| C | 3.96616 | -0.54991 | -0.48172 |
| C | 4.44401 | -0.53276 | 0.84965  |
| C | 3.67794 | -1.13642 | 1.87431  |
| C | 2.45538 | -1.74784 | 1.57891  |
| C | 1.94812 | -1.77888 | 0.23416  |
| H | 2.38205 | -1.16936 | -1.81497 |
| H | 4.55387 | -0.08618 | -1.27094 |
| H | 5.39393 | -0.05861 | 1.08397  |
| H | 4.04368 | -1.12389 | 2.89872  |
| H | 1.8698  | -2.21095 | 2.37103  |
| C | 0.70797 | -2.39894 | -0.07206 |
| H | 0.10525 | -2.86798 | 0.70199  |
| H | 0.32508 | -2.42294 | -1.08953 |

UM06/6-311+g(d,p)-SMD-water//UB3LYP/6-31G(d)-gas

HF = -270.75733

UB3LYP-D3/6-311+g(d,p)-SMD-water//UB3LYP/6-31G(d)-gas

HF=-270.9952919

DLPNO-CCSD(T)/def2-TZVPP//uB3LYP/6-31G(d)-gas

HF = -270.397554147875

$\Delta G_{\text{solv}} = -0.000751$

### Ni-VE-By-substrate

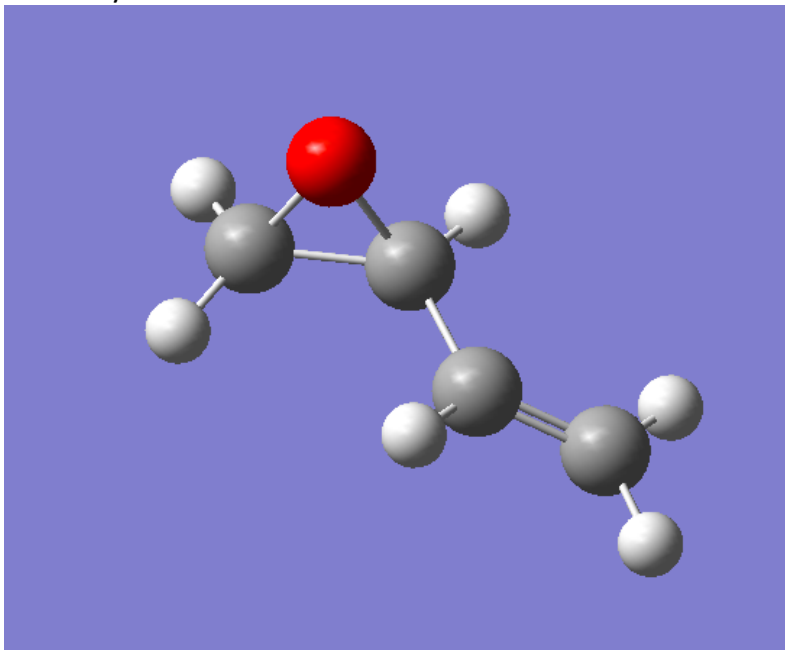

UB3LYP/6-31g(d)-gas

Zero-point correction= 0.090843 (Hartree/Particle)

Thermal correction to Energy= 0.095976

Thermal correction to Enthalpy= 0.096921

Thermal correction to Gibbs Free Energy= 0.062850

Sum of electronic and zero-point Energies= -231.095575

Sum of electronic and thermal Energies= -231.090442

Sum of electronic and thermal Enthalpies= -231.089498

Sum of electronic and thermal Free Energies= -231.123568

|   |         |          |          |
|---|---------|----------|----------|
| C | 1.63349 | 0.0152   | 1.78963  |
| H | 2.27435 | 0.84994  | 1.49639  |
| C | 1.2083  | -0.94134 | 0.74956  |
| H | 1.78433 | -0.3319  | 2.68677  |
| H | 1.04247 | -1.86397 | 1.01291  |
| C | 1.89387 | -0.84922 | -0.62634 |
| C | 1.76105 | -1.99599 | -1.58584 |
| H | 2.85325 | -0.30568 | -0.56929 |
| H | 1.17447 | -2.88181 | -1.28537 |
| H | 2.62542 | -2.2722  | -2.21482 |
| O | 1.04532 | -0.70447 | -1.85607 |

UM06/6-311+g(d,p)-SMD-water//UB3LYP/6-31G(d)-gas

HF=-231.0961417

UB3LYP-D3/6-311+g(d,p)-SMD-water//UB3LYP/6-31G(d)-gas

HF=-231.2679346

DLPNO-CCSD(T)/def2-TZVPP//uB3LYP/6-31G(d)-gas

HF = -230.802082513855

$\Delta G_{\text{solv}} = -0.0054462$

B'

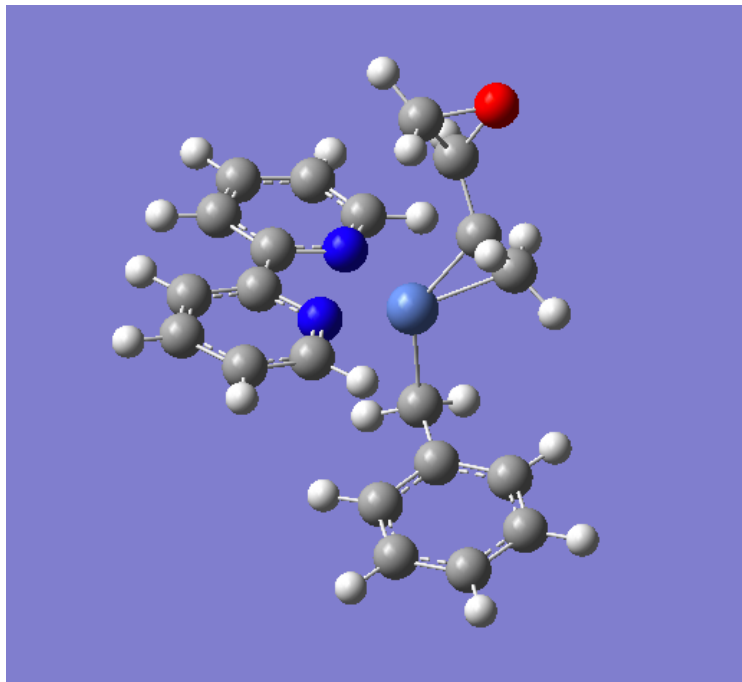

UB3LYP/6-31g(d)-gas

Zero-point correction= 0.370239 (Hartree/Particle)

Thermal correction to Energy= 0.393161

Thermal correction to Enthalpy= 0.394106

Thermal correction to Gibbs Free Energy= 0.313482

Sum of electronic and zero-point Energies= -2505.361098

Sum of electronic and thermal Energies= -2505.338175

Sum of electronic and thermal Enthalpies= -2505.337231

Sum of electronic and thermal Free Energies= -2505.417854

|   |          |          |          |
|---|----------|----------|----------|
| C | -1.08408 | 1.75012  | 0.69367  |
| C | 1.20805  | 1.4324   | 0.92934  |
| C | 1.31986  | 2.51277  | 1.79753  |
| C | 0.17173  | 3.23828  | 2.11524  |
| C | -1.04231 | 2.84826  | 1.55937  |
| C | -2.32473 | 1.25743  | 0.05758  |
| C | -3.19768 | -0.16329 | -1.55011 |
| C | -4.50409 | 0.21548  | -1.25762 |
| C | -4.71089 | 1.15569  | -0.24603 |
| C | -3.60965 | 1.68102  | 0.4217   |
| H | 2.06897  | 0.82662  | 0.67327  |
| H | 2.28763  | 2.77115  | 2.21412  |
| H | 0.21964  | 4.09302  | 2.7832   |

|    |          |          |          |
|----|----------|----------|----------|
| H  | -1.94679 | 3.40226  | 1.78355  |
| H  | -2.98412 | -0.89679 | -2.32327 |
| H  | -5.33434 | -0.21716 | -1.80642 |
| H  | -5.71495 | 1.47037  | 0.0227   |
| H  | -3.75112 | 2.39786  | 1.22303  |
| N  | 0.04077  | 1.05826  | 0.37497  |
| N  | -2.13    | 0.34052  | -0.91687 |
| Ni | -0.11549 | -0.3651  | -0.978   |
| C  | 1.8752   | -3.05474 | 0.46009  |
| C  | 3.08711  | -3.34317 | 1.08223  |
| C  | 3.41955  | -2.74473 | 2.30161  |
| C  | 2.51274  | -1.86055 | 2.8886   |
| C  | 1.30057  | -1.57219 | 2.26112  |
| C  | 0.94589  | -2.15456 | 1.02571  |
| H  | 1.62974  | -3.54356 | -0.4801  |
| H  | 3.77497  | -4.04587 | 0.61733  |
| H  | 4.36351  | -2.97313 | 2.78918  |
| H  | 2.74479  | -1.39979 | 3.84657  |
| H  | 0.59517  | -0.89906 | 2.7439   |
| C  | -0.33231 | -1.82424 | 0.35176  |
| H  | -1.06937 | -1.46494 | 1.08141  |
| H  | -0.74897 | -2.69932 | -0.15538 |
| C  | 0.13302  | -1.60994 | -2.47576 |
| H  | -0.70148 | -1.50203 | -3.17391 |
| H  | 0.41179  | -2.64307 | -2.28903 |
| C  | 1.14787  | -0.61584 | -2.46573 |
| H  | 2.17897  | -0.84164 | -2.19988 |
| C  | 0.69765  | 0.72139  | -2.57881 |
| H  | -0.14932 | 0.91912  | -3.23509 |
| C  | 1.65112  | 1.8969   | -2.44166 |
| H  | 2.43771  | 1.65923  | -1.6992  |
| H  | 1.11032  | 2.80091  | -2.10134 |
| O  | 1.54377  | 1.15542  | -3.7495  |

UM06/6-311+g(d,p)-SMD-water//UB3LYP/6-31G(d)-gas  
HF=-2505.3023645  
UB3LYP-D3/6-311+g(d,p)-SMD-water//UB3LYP/6-31G(d)-gas  
HF=-2506.2104688  
DLPNO-CCSD(T)/def2-TZVPP//uB3LYP/6-31G(d)-gas  
HF = -2503.329788687910  
 $\Delta G_{\text{solv}} = -0.0193036$

B'-TS

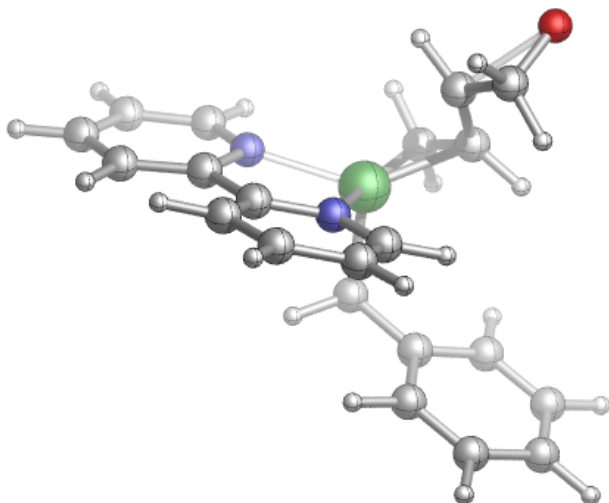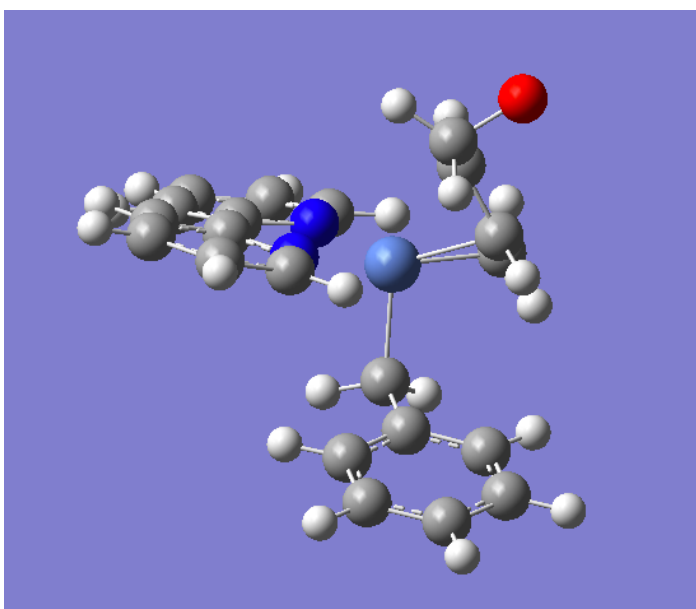

UB3LYP/6-31g(d)-gas

Imaginary frequency =  $-319.59 \text{ cm}^{-1}$

Zero-point correction= 0.368655 (Hartree/Particle)

Thermal correction to Energy= 0.391384

Thermal correction to Enthalpy= 0.392328

Thermal correction to Gibbs Free Energy= 0.313674

Sum of electronic and zero-point Energies= -2505.324378

Sum of electronic and thermal Energies= -2505.301649

Sum of electronic and thermal Enthalpies= -2505.300704

Sum of electronic and thermal Free Energies= -2505.379358

|   |          |         |         |
|---|----------|---------|---------|
| C | -1.08408 | 1.75012 | 0.69367 |
| C | 1.20805  | 1.4324  | 0.92934 |
| C | 1.31986  | 2.51277 | 1.79753 |
| C | 0.17173  | 3.23828 | 2.11524 |
| C | -1.04231 | 2.84826 | 1.55937 |

|    |          |          |          |
|----|----------|----------|----------|
| C  | -2.32473 | 1.25743  | 0.05758  |
| C  | -3.19768 | -0.16329 | -1.55011 |
| C  | -4.50409 | 0.21548  | -1.25762 |
| C  | -4.71089 | 1.15569  | -0.24603 |
| C  | -3.60965 | 1.68102  | 0.4217   |
| H  | 2.06897  | 0.82662  | 0.67327  |
| H  | 2.28763  | 2.77115  | 2.21412  |
| H  | 0.21964  | 4.09302  | 2.7832   |
| H  | -1.94679 | 3.40226  | 1.78355  |
| H  | -2.98412 | -0.89679 | -2.32327 |
| H  | -5.33434 | -0.21716 | -1.80642 |
| H  | -5.71495 | 1.47037  | 0.0227   |
| H  | -3.75112 | 2.39786  | 1.22303  |
| N  | 0.04077  | 1.05826  | 0.37497  |
| N  | -2.13    | 0.34052  | -0.91687 |
| Ni | -0.11549 | -0.3651  | -0.978   |
| C  | 1.8752   | -3.05474 | 0.46009  |
| C  | 3.08711  | -3.34317 | 1.08223  |
| C  | 3.41955  | -2.74473 | 2.30161  |
| C  | 2.51274  | -1.86055 | 2.8886   |
| C  | 1.30057  | -1.57219 | 2.26112  |
| C  | 0.94589  | -2.15456 | 1.02571  |
| H  | 1.62974  | -3.54356 | -0.4801  |
| H  | 3.77497  | -4.04587 | 0.61733  |
| H  | 4.36351  | -2.97313 | 2.78918  |
| H  | 2.74479  | -1.39979 | 3.84657  |
| H  | 0.59517  | -0.89906 | 2.7439   |
| C  | -0.33231 | -1.82424 | 0.35176  |
| H  | -1.06937 | -1.46494 | 1.08141  |
| H  | -0.74897 | -2.69932 | -0.15538 |
| C  | 0.13302  | -1.60994 | -2.47576 |
| H  | -0.70148 | -1.50203 | -3.17391 |
| H  | 0.41179  | -2.64307 | -2.28903 |
| C  | 1.14787  | -0.61584 | -2.46573 |
| H  | 2.17897  | -0.84164 | -2.19988 |
| C  | 0.69765  | 0.72139  | -2.57881 |
| H  | -0.14932 | 0.91912  | -3.23509 |
| C  | 1.65112  | 1.8969   | -2.44166 |
| H  | 2.43771  | 1.65923  | -1.6992  |
| H  | 1.11032  | 2.80091  | -2.10134 |
| O  | 1.8641   | 1.36807  | -3.99328 |

UM06/6-311+g(d,p)-SMD-water//UB3LYP/6-31G(d)-gas  
HF = - 2505.2857689  
UB3LYP-D3/6-311+g(d,p)-SMD-water//UB3LYP/6-31G(d)-gas  
HF=-2506.2003958

DLPNO-CCSD(T)/def2-TZVPP//uB3LYP/6-31G(d)-gas  
 HF = -2503.279192796534  
 $\Delta G_{\text{solv}} = -0.0390393$

A''

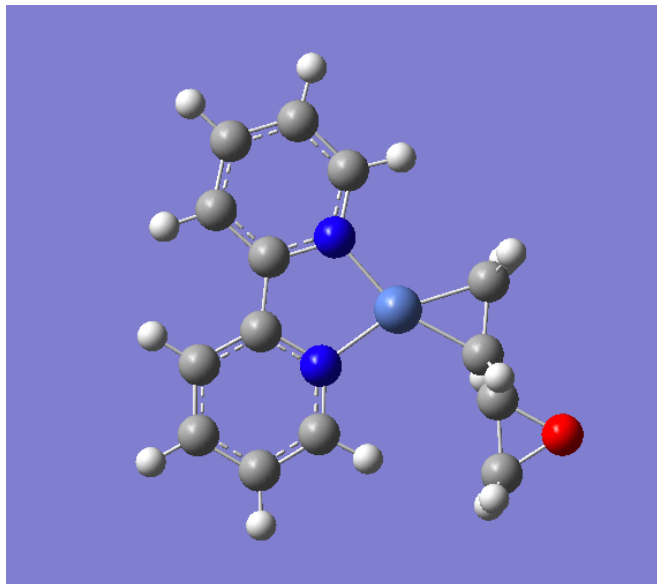

UB3LYP/6-31g(d)-gas

|                                              |                             |
|----------------------------------------------|-----------------------------|
| Zero-point correction=                       | 0.252481 (Hartree/Particle) |
| Thermal correction to Energy=                | 0.268299                    |
| Thermal correction to Enthalpy=              | 0.269244                    |
| Thermal correction to Gibbs Free Energy=     | 0.207211                    |
| Sum of electronic and zero-point Energies=   | -2234.523418                |
| Sum of electronic and thermal Energies=      | -2234.507600                |
| Sum of electronic and thermal Enthalpies=    | -2234.506656                |
| Sum of electronic and thermal Free Energies= | -2234.568688                |

|   |          |          |          |
|---|----------|----------|----------|
| C | -2.09139 | 2.31433  | 0.86226  |
| C | -0.60045 | 2.29548  | 2.65039  |
| C | -1.34907 | 3.2387   | 3.34487  |
| C | -2.51948 | 3.72874  | 2.76326  |
| C | -2.89366 | 3.25707  | 1.50751  |
| C | -2.36718 | 1.74219  | -0.47025 |
| C | -1.59    | 0.23902  | -2.07149 |
| C | -2.62395 | 0.56782  | -2.94186 |
| C | -3.56447 | 1.51936  | -2.54539 |
| C | -3.42795 | 2.11877  | -1.29569 |
| H | 0.30859  | 1.87258  | 3.06297  |
| H | -1.01858 | 3.57672  | 4.32156  |
| H | -3.13207 | 4.46249  | 3.27829  |
| H | -3.80343 | 3.61582  | 1.03871  |
| H | -0.81183 | -0.46833 | -2.33986 |
| H | -2.68287 | 0.08483  | -3.91175 |



|    |          |          |          |
|----|----------|----------|----------|
| H  | -4.38439 | 1.79863  | -3.20026 |
| H  | -4.13605 | 2.87402  | -0.97226 |
| N  | -0.94936 | 1.83577  | 1.43434  |
| N  | -1.46337 | 0.79615  | -0.85248 |
| Ni | -0.13439 | 0.41052  | 0.46111  |
| C  | 1.16771  | -0.16166 | 2.17333  |
| H  | 1.78899  | 0.70341  | 1.93011  |
| C  | 0.53731  | -0.90572 | 1.06587  |
| H  | 1.44649  | -0.66908 | 2.95621  |
| H  | 0.37552  | -1.85849 | 1.18485  |
| C  | 0.99399  | -0.57334 | -0.36681 |
| C  | 0.6564   | -1.5233  | -1.47899 |
| H  | 1.97313  | -0.06313 | -0.37557 |
| H  | 0.75491  | -1.18219 | -2.52445 |
| H  | -0.19424 | -2.2159  | -1.35341 |
| O  | 1.79401  | -2.7243  | -1.61709 |

UM06/6-311+g(d,p)-SMD-water//UB3LYP/6-31G(d)-gas  
HF=-2234.5095924  
UB3LYP-D3/6-311+g(d,p)-SMD-water//UB3LYP/6-31G(d)-gas  
HF=-2235.1741033  
DLPNO-CCSD(T)/def2-TZVPP//uB3LYP/6-31G(d)-gas  
HF = -2232.882939502140  
 $\Delta G_{\text{solv}} = -0.0206952$

A''-TS

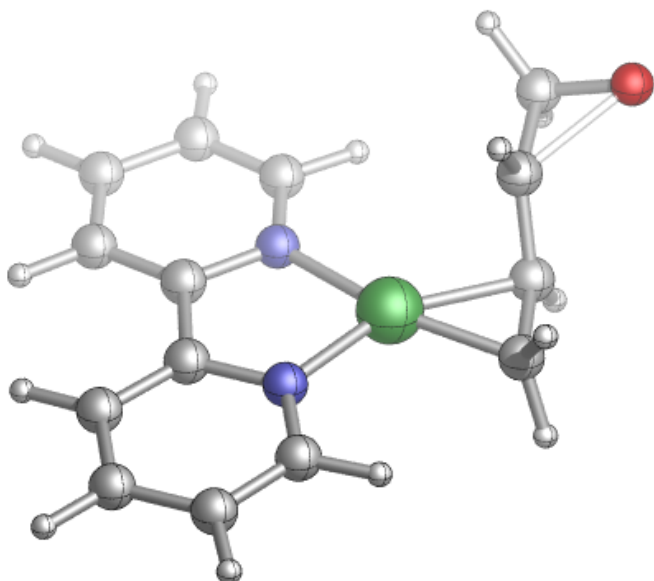

A''-TS

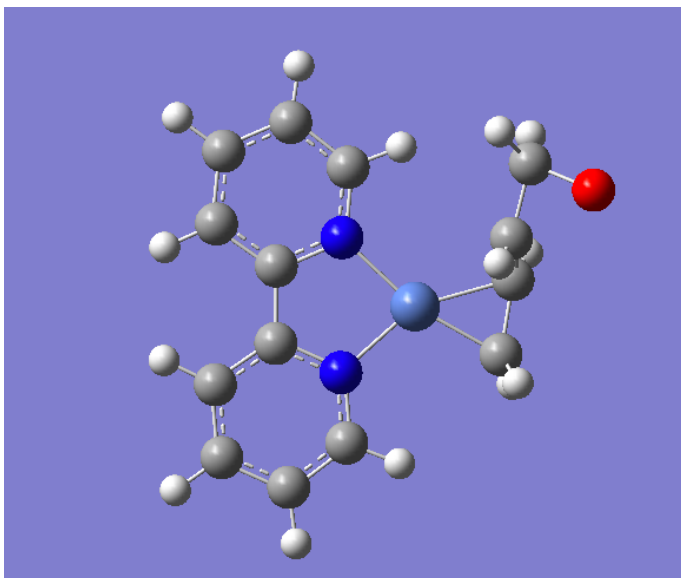

UB3LYP/6-31g(d)-gas

Imaginary frequency =  $-329.39 \text{ cm}^{-1}$

Zero-point correction= 0.251353 (Hartree/Particle)

Thermal correction to Energy= 0.266957

Thermal correction to Enthalpy= 0.267901

Thermal correction to Gibbs Free Energy= 0.207241

Sum of electronic and zero-point Energies= -2234.525252

Sum of electronic and thermal Energies= -2234.509648

Sum of electronic and thermal Enthalpies= -2234.508704

Sum of electronic and thermal Free Energies= -2234.569364

|   |          |         |          |
|---|----------|---------|----------|
| C | -2.21805 | 2.2067  | 1.01322  |
| C | -0.8602  | 2.24573 | 2.90975  |
| C | -1.85308 | 2.85778 | 3.66243  |
| C | -3.08162 | 3.13915 | 3.06051  |
| C | -3.26027 | 2.80848 | 1.72103  |
| C | -2.26557 | 1.84905 | -0.4142  |
| C | -1.02128 | 0.94125 | -2.16952 |
| C | -2.06512 | 1.16928 | -3.06505 |
| C | -3.2467  | 1.7485  | -2.60533 |
| C | -3.34417 | 2.10529 | -1.26234 |
| H | 0.10485  | 2.00186 | 3.33588  |
| H | -1.66162 | 3.10734 | 4.70086  |
| H | -3.88259 | 3.61019 | 3.62197  |
| H | -4.20318 | 3.01742 | 1.2281   |
| H | -0.03147 | 0.56791 | -2.4532  |
| H | -1.93935 | 0.90042 | -4.1089  |
| H | -4.07648 | 1.9356  | -3.28106 |
| H | -4.2424  | 2.58264 | -0.88617 |
| N | -1.02411 | 1.91274 | 1.61144  |
| N | -1.12845 | 1.24983 | -0.86255 |

|    |         |          |          |
|----|---------|----------|----------|
| Ni | 0.12817 | 0.87645  | 0.57706  |
| C  | 1.17951 | -0.03141 | 1.83021  |
| H  | 2.04927 | 0.49458  | 2.23892  |
| C  | 1.36142 | -0.67741 | 0.53589  |
| H  | 0.659   | -0.60703 | 2.5993   |
| H  | 0.86863 | -1.61779 | 0.2884   |
| C  | 2.28411 | -0.14783 | -0.37521 |
| C  | 2.61845 | -0.66706 | -1.7188  |
| H  | 2.77675 | 0.79031  | -0.12996 |
| H  | 3.04322 | 0.11678  | -2.38177 |
| H  | 1.76236 | -1.1248  | -2.25478 |
| O  | 3.35321 | -1.31789 | -0.75022 |

UM06/6-311+g(d,p)-SMD-water//UB3LYP/6-31G(d)-gas  
HF=-2234.5046845  
UB3LYP-D3/6-311+g(d,p)-SMD-water//UB3LYP/6-31G(d)-gas  
HF=-2235.1763672  
DLPNO-CCSD(T)/def2-TZVPP//uB3LYP/6-31G(d)-gas  
HF = -2232.854547783025  
 $\Delta G_{\text{solv}} = -0.039931$

B''

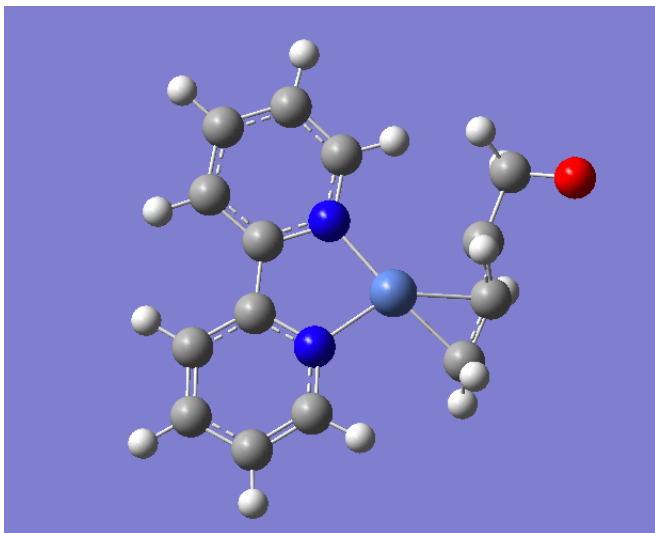

|                                            |                             |
|--------------------------------------------|-----------------------------|
| UB3LYP/6-31g(d)-gas                        |                             |
| Zero-point correction=                     | 0.251237 (Hartree/Particle) |
| Thermal correction to Energy=              | 0.267198                    |
| Thermal correction to Enthalpy=            | 0.268142                    |
| Thermal correction to Gibbs Free Energy=   | 0.207218                    |
| Sum of electronic and zero-point Energies= | -2234.499830                |
| Sum of electronic and thermal Energies=    | -2234.483869                |
| Sum of electronic and thermal Enthalpies=  | -2234.482924                |

Sum of electronic and thermal Free Energies= -2234.543848

|    |          |          |          |
|----|----------|----------|----------|
| C  | -2.09139 | 2.31433  | 0.86226  |
| C  | -0.60045 | 2.29548  | 2.65039  |
| C  | -1.34907 | 3.2387   | 3.34487  |
| C  | -2.51948 | 3.72874  | 2.76326  |
| C  | -2.89366 | 3.25707  | 1.50751  |
| C  | -2.36718 | 1.74219  | -0.47025 |
| C  | -1.59    | 0.23902  | -2.07149 |
| C  | -2.62395 | 0.56782  | -2.94186 |
| C  | -3.56447 | 1.51936  | -2.54539 |
| C  | -3.42795 | 2.11877  | -1.29569 |
| H  | 0.30859  | 1.87258  | 3.06297  |
| H  | -1.01858 | 3.57672  | 4.32156  |
| H  | -3.13207 | 4.46249  | 3.27829  |
| H  | -3.80343 | 3.61582  | 1.03871  |
| H  | -0.81183 | -0.46833 | -2.33986 |
| H  | -2.68287 | 0.08483  | -3.91175 |
| H  | -4.38439 | 1.79863  | -3.20026 |
| H  | -4.13605 | 2.87402  | -0.97226 |
| N  | -0.94936 | 1.83577  | 1.43434  |
| N  | -1.46337 | 0.79615  | -0.85248 |
| Ni | -0.13439 | 0.41052  | 0.46111  |
| C  | 0.64814  | -1.55952 | 1.45703  |
| H  | 1.1168   | -1.12328 | 2.34221  |
| C  | 0.81569  | -0.87001 | 0.16319  |
| H  | 0.59959  | -2.53195 | 1.44665  |
| H  | 0.81451  | -1.40784 | -0.64849 |
| C  | 1.84279  | 0.27536  | 0.09394  |
| C  | 2.30199  | 0.76325  | -1.24936 |
| H  | 2.57003  | 0.22277  | 0.92308  |
| H  | 2.83311  | 1.72887  | -1.31668 |
| H  | 1.66266  | 0.58597  | -2.13189 |
| O  | 3.57617  | -0.13594 | -1.81814 |

UM06/6-311+g(d,p)-SMD-water//UB3LYP/6-31G(d)-gas

HF=-2234.5213308

UB3LYP-D3/6-311+g(d,p)-SMD-water//UB3LYP/6-31G(d)-gas

HF = - 2235.1929384

DLPNO-CCSD(T)/def2-TZVPP//uB3LYP/6-31G(d)-gas

HF = -2232.8431

$\Delta G_{\text{solv}} = -0.0624885$

B''-C-TS

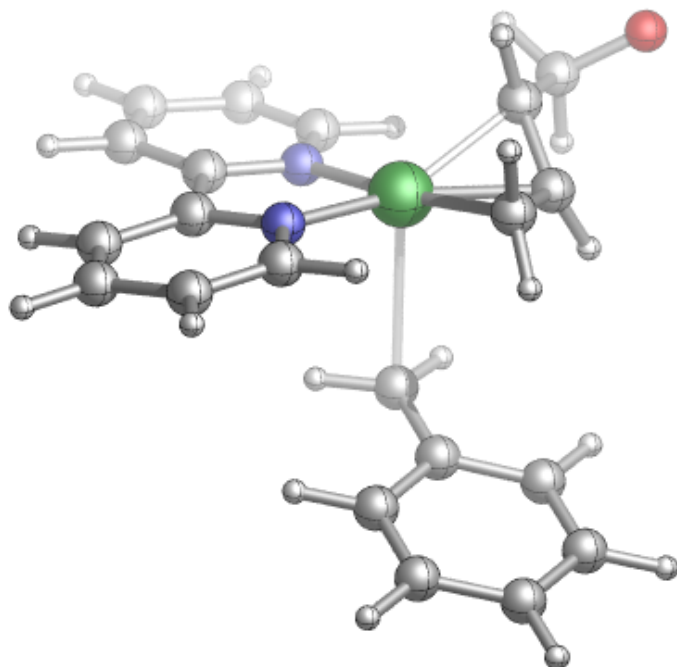

B''-C-TS

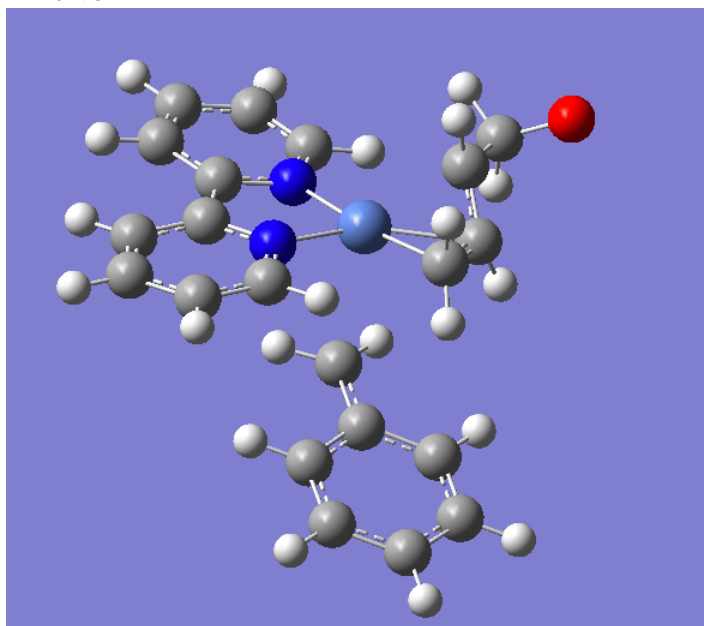

UB3LYP/6-31g(d)-gas

Imaginary frequency =  $-118.30 \text{ cm}^{-1}$

Zero-point correction= 0.366489 (Hartree/Particle)

Thermal correction to Energy= 0.389629

Thermal correction to Enthalpy= 0.390573

Thermal correction to Gibbs Free Energy= 0.309400

Sum of electronic and zero-point Energies=  $-2505.299540$

Sum of electronic and thermal Energies=  $-2505.276400$

|                                              |                            |
|----------------------------------------------|----------------------------|
| Sum of electronic and thermal Enthalpies=    | -2505.275456               |
| Sum of electronic and thermal Free Energies= | -2505.356629               |
| C                                            | -1.6496 1.2818 1.34746     |
| C                                            | 0.6055 1.81183 1.79102     |
| C                                            | 0.26003 2.60437 2.89104    |
| C                                            | -1.10348 2.7151 3.24415    |
| C                                            | -2.05844 2.04413 2.46607   |
| C                                            | -2.5476 0.57738 0.44555    |
| C                                            | -2.6721 -0.94304 -1.35147  |
| C                                            | -4.07159 -0.88506 -1.37573 |
| C                                            | -4.72984 -0.05014 -0.44806 |
| C                                            | -3.95693 0.68734 0.46427   |
| H                                            | 1.64164 1.68806 1.49557    |
| H                                            | 1.03494 3.11664 3.45248    |
| H                                            | -1.4086 3.30577 4.10355    |
| H                                            | -3.11074 2.10083 2.72524   |
| H                                            | -2.13205 -1.57032 -2.04963 |
| H                                            | -4.62223 -1.47773 -2.09914 |
| H                                            | -5.81371 0.02789 -0.44136  |
| H                                            | -4.43693 1.3528 1.17458    |
| N                                            | -0.31562 1.15801 1.01642   |
| N                                            | -1.90476 -0.2391 -0.46238  |
| Ni                                           | 0.01751 -0.13324 -0.34789  |
| C                                            | 1.56911 -3.00405 1.49008   |
| C                                            | 2.95027 -3.02211 1.61029   |
| C                                            | 3.61524 -2.01623 2.32751   |
| C                                            | 2.87324 -0.98619 2.92492   |
| C                                            | 1.49182 -0.95578 2.80895   |
| C                                            | 0.79031 -1.96584 2.08432   |
| H                                            | 1.05923 -3.78806 0.93559   |
| H                                            | 3.52074 -3.82184 1.14543   |
| H                                            | 4.69728 -2.03556 2.41998   |
| H                                            | 3.38443 -0.20695 3.48482   |
| H                                            | 0.92196 -0.15344 3.27132   |
| C                                            | -0.61159 -1.94001 1.96292  |
| H                                            | -1.19995 -1.14607 2.41279  |
| H                                            | -1.14303 -2.71192 1.41599  |
| C                                            | 1.9537 -0.27448 -0.22614   |
| H                                            | 2.40663 0.58352 -0.72956   |
| H                                            | 2.41666 -0.52918 0.72549   |
| C                                            | 1.43789 -1.33452 -1.01819  |
| H                                            | 1.41227 -2.35578 -0.63945  |
| C                                            | 0.64903 -0.99034 -2.12941  |
| H                                            | 0.9012 -0.06924 -2.66265   |
| C                                            | 0.05869 -2.0586 -3.03744   |
| H                                            | -0.83786 -1.65833 -3.56619 |

H            -0.2854 -2.91871 -2.41372  
 O            1.1063 -2.31999 -3.85428  
 UM06/6-311+g(d,p)-SMD-water//UB3LYP/6-31G(d)-gas  
 HF=-2505.2944336  
 UB3LYP-D3/6-311+g(d,p)-SMD-water//UB3LYP/6-31G(d)-gas  
 HF = -2506.2038158  
 DLPNO-CCSD(T)/def2-TZVPP//uB3LYP/6-31G(d)-gas  
 HF = -2503.253379015522  
 $\Delta G_{\text{solv}} = -0.0613693$

C

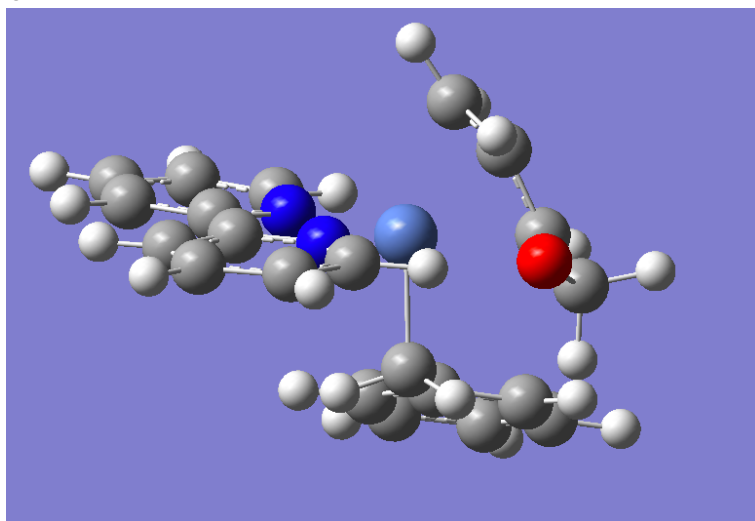

UB3LYP/6-31g(d)-gas  
 Zero-point correction=            0.368972 (Hartree/Particle)  
 Thermal correction to Energy=    0.391340  
 Thermal correction to Enthalpy=   0.392284  
 Thermal correction to Gibbs Free Energy=   0.316297  
 Sum of electronic and zero-point Energies=   -2505.338240  
 Sum of electronic and thermal Energies=   -2505.315872  
 Sum of electronic and thermal Enthalpies=   -2505.314928  
 Sum of electronic and thermal Free Energies=   -2505.390915  
 C            -1.52959 -0.2832  2.37299  
 C             0.66317  0.22089  2.98422  
 C             0.26326  0.6746  4.23412  
 C            -1.09331  0.63081  4.5604  
 C            -1.99563  0.15047  3.61794  
 C            -2.38927 -0.76001  1.2763  
 C            -2.42354 -1.34748 -0.98999  
 C            -3.81004 -1.52569 -0.93487  
 C            -4.48983 -1.33293  0.26276  
 C            -3.76889 -0.93058  1.38643  
 H             1.70519  0.22769  2.68906  
 H             1.00324  1.05034  4.93263

|    |          |          |          |
|----|----------|----------|----------|
| H  | -1.44332 | 0.97224  | 5.52985  |
| H  | -3.05566 | 0.12324  | 3.8418   |
| H  | -1.82853 | -1.35462 | -1.94374 |
| H  | -4.33707 | -1.81067 | -1.84006 |
| H  | -5.56482 | -1.47727 | 0.32793  |
| H  | -4.27553 | -0.7549  | 2.3289   |
| N  | -0.20238 | -0.25756 | 2.06901  |
| N  | -1.72559 | -0.99121 | 0.10966  |
| Ni | 0.23847  | -0.93697 | 0.33881  |
| C  | 1.67633  | 1.50578  | -2.73846 |
| C  | 2.84579  | 2.028    | -3.27364 |
| C  | 3.62099  | 2.94076  | -2.54419 |
| C  | 3.21083  | 3.33156  | -1.26172 |
| C  | 2.04348  | 2.81837  | -0.71381 |
| C  | 1.24056  | 1.89302  | -1.43653 |
| H  | 1.06449  | 0.78834  | -3.28509 |
| H  | 3.1614   | 1.72688  | -4.26954 |
| H  | 4.53515  | 3.34542  | -2.97039 |
| H  | 3.80754  | 4.04302  | -0.69574 |
| H  | 1.72245  | 3.13122  | 0.27806  |
| C  | 0.03438  | 1.35819  | -0.9123  |
| H  | -0.40418 | 1.79883  | -0.02053 |
| H  | -0.58769 | 0.76477  | -1.57417 |
| C  | 2.01628  | -1.61358 | 0.74633  |
| H  | 2.78574  | -0.88668 | 0.47812  |
| H  | 2.16834  | -2.07883 | 1.72067  |
| C  | 1.43097  | -2.39603 | -0.29719 |
| H  | 1.03997  | -3.39597 | -0.10548 |
| C  | 1.05503  | -1.69432 | -1.44099 |
| H  | 1.63983  | -0.81184 | -1.69559 |
| C  | 0.15883  | -2.14958 | -2.5765  |
| H  | -0.45509 | -3.01103 | -2.18333 |
| H  | 0.81979  | -2.6249  | -3.34577 |
| O  | -0.57159 | -1.09859 | -3.03637 |

UM06/6-311+g(d,p)-SMD-water//UB3LYP/6-31G(d)-gas  
HF=-2505.3019133  
UB3LYP-D3/6-311+g(d,p)-SMD-water//UB3LYP/6-31G(d)-gas  
HF=-2506.2165871  
DLPNO-CCSD(T)/def2-TZVPP//uB3LYP/6-31G(d)-gas  
HF = -2503.305941489868  
 $\Delta G_{\text{solv}} = -0.0344223$

P<sub>L</sub>



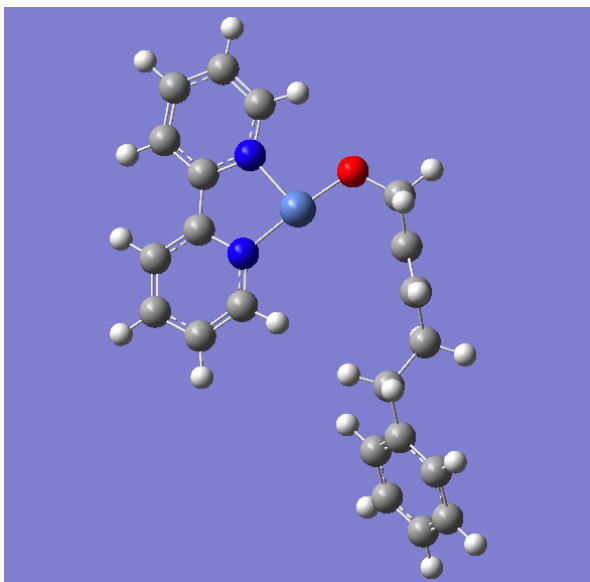

UB3LYP/6-31g(d)-gas

Zero-point correction= 0.372785 (Hartree/Particle)  
 Thermal correction to Energy= 0.395870  
 Thermal correction to Enthalpy= 0.396814  
 Thermal correction to Gibbs Free Energy= 0.313731  
 Sum of electronic and zero-point Energies= -2505.410880  
 Sum of electronic and thermal Energies= -2505.387795  
 Sum of electronic and thermal Enthalpies= -2505.386851  
 Sum of electronic and thermal Free Energies= -2505.469934

|    |          |          |          |
|----|----------|----------|----------|
| C  | -3.28798 | 0.69913  | 0.35567  |
| C  | -1.16957 | 0.00449  | 1.11144  |
| C  | -1.61602 | -0.10808 | 2.40753  |
| C  | -2.96357 | 0.20076  | 2.70018  |
| C  | -3.78778 | 0.60128  | 1.66201  |
| C  | -4.06488 | 1.09337  | -0.80647 |
| C  | -3.94302 | 1.43252  | -3.12511 |
| C  | -5.27897 | 1.79434  | -3.19524 |
| C  | -6.03125 | 1.80196  | -2.00734 |
| C  | -5.42591 | 1.4509   | -0.81182 |
| H  | -0.14174 | -0.22577 | 0.84886  |
| H  | -0.93096 | -0.43071 | 3.18486  |
| H  | -3.34539 | 0.12329  | 3.71305  |
| H  | -4.82893 | 0.83974  | 1.85454  |
| H  | -3.29515 | 1.39766  | -3.99607 |
| H  | -5.72353 | 2.06298  | -4.14756 |
| H  | -7.08123 | 2.08033  | -2.02368 |
| H  | -5.99583 | 1.45223  | 0.11118  |
| N  | -1.95981 | 0.405    | 0.07329  |
| N  | -3.34871 | 1.09122  | -1.96925 |
| Ni | -1.47546 | 0.57395  | -1.72361 |

|   |         |          |          |
|---|---------|----------|----------|
| C | 4.32524 | 0.11979  | 2.60261  |
| C | 4.98306 | -0.41393 | 3.7086   |
| C | 5.16384 | -1.79537 | 3.81703  |
| C | 4.67972 | -2.62793 | 2.80987  |
| C | 4.01826 | -2.0875  | 1.70303  |
| C | 3.82921 | -0.7057  | 1.58072  |
| H | 4.19279 | 1.19742  | 2.52527  |
| H | 5.35865 | 0.24816  | 4.48476  |
| H | 5.67891 | -2.21542 | 4.67684  |
| H | 4.81574 | -3.70424 | 2.87985  |
| H | 3.65257 | -2.75756 | 0.93098  |
| C | 3.10101 | -0.0677  | 0.408    |
| H | 2.15091 | 0.35661  | 0.76544  |
| H | 3.68554 | 0.79635  | 0.06206  |
| C | 2.81071 | -0.9796  | -0.79727 |
| H | 2.1725  | -1.82074 | -0.49802 |
| H | 3.76114 | -1.41612 | -1.14112 |
| C | 2.16186 | -0.2407  | -1.93665 |
| H | 2.68558 | 0.65354  | -2.28362 |
| C | 1.03111 | -0.59687 | -2.56021 |
| H | 0.50009 | -1.49888 | -2.24204 |
| C | 0.40375 | 0.14923  | -3.71332 |
| H | 0.37852 | -0.51522 | -4.59707 |
| H | 1.05237 | 1.00112  | -3.98582 |
| O | -0.8974 | 0.58068  | -3.41635 |

UM06/6-311+g(d,p)-SMD-water//UB3LYP/6-31G(d)-gas  
HF=-2505.3541091  
UB3LYP-D3/6-311+g(d,p)-SMD-water//UB3LYP/6-31G(d)-gas  
HF = -2506.2673435  
DLPNO-CCSD(T)/def2-TZVPP//uB3LYP/6-31G(d)-gas  
HF = -2503.370430155434  
 $\Delta G_{\text{solv}} = -0.0228725$

P<sub>B</sub>

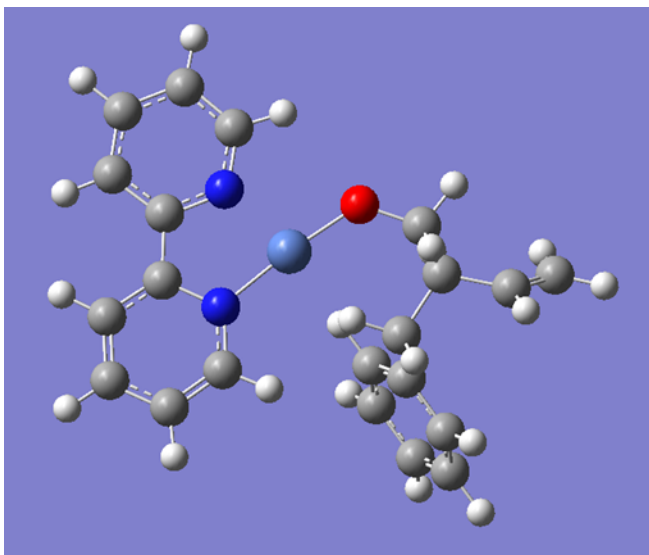

UB3LYP/6-31g(d)-gas

Zero-point correction= 0.372712 (Hartree/Particle)

Thermal correction to Energy= 0.395587

Thermal correction to Enthalpy= 0.396532

Thermal correction to Gibbs Free Energy= 0.315690

Sum of electronic and zero-point Energies= -2505.407982

Sum of electronic and thermal Energies= -2505.385106

Sum of electronic and thermal Enthalpies= -2505.384162

Sum of electronic and thermal Free Energies= -2505.465003

|    |          |          |          |
|----|----------|----------|----------|
| C  | -2.41018 | 2.09416  | 0.98134  |
| C  | -0.09    | 2.17185  | 1.33364  |
| C  | -0.23051 | 3.07095  | 2.36716  |
| C  | -1.52122 | 3.51683  | 2.7207   |
| C  | -2.60513 | 3.01675  | 2.01818  |
| C  | -3.4742  | 1.49055  | 0.19483  |
| C  | -3.89665 | -0.035   | -1.53483 |
| C  | -5.26562 | 0.15896  | -1.44199 |
| C  | -5.74773 | 1.06623  | -0.48293 |
| C  | -4.85168 | 1.73491  | 0.33606  |
| H  | 0.88945  | 1.80428  | 1.04487  |
| H  | 0.65011  | 3.42211  | 2.89514  |
| H  | -1.66351 | 4.23099  | 3.52539  |
| H  | -3.61165 | 3.33352  | 2.27147  |
| H  | -3.4462  | -0.70864 | -2.25771 |
| H  | -5.93953 | -0.37715 | -2.10171 |
| H  | -6.81446 | 1.24453  | -0.38165 |
| H  | -5.21028 | 2.43969  | 1.07855  |
| N  | -1.13976 | 1.67576  | 0.61941  |
| N  | -3.02286 | 0.60308  | -0.73711 |
| Ni | -1.06424 | 0.50169  | -0.8477  |

|   |          |          |          |
|---|----------|----------|----------|
| C | 3.45124  | -0.36794 | 1.19085  |
| C | 4.15827  | -0.9004  | 2.27103  |
| C | 3.85671  | -2.1775  | 2.7428   |
| C | 2.84408  | -2.91445 | 2.12387  |
| C | 2.13957  | -2.37647 | 1.04798  |
| C | 2.42784  | -1.09091 | 0.56417  |
| H | 3.70171  | 0.62575  | 0.82384  |
| H | 4.94722  | -0.31663 | 2.73859  |
| H | 4.40536  | -2.59662 | 3.58204  |
| H | 2.60094  | -3.91194 | 2.48125  |
| H | 1.3504   | -2.95983 | 0.58061  |
| C | 1.62848  | -0.49347 | -0.57212 |
| H | 0.59864  | -0.33189 | -0.19755 |
| H | 2.02851  | 0.4982   | -0.84001 |
| C | 3.29349  | -2.70162 | -2.98112 |
| H | 2.72396  | -3.62272 | -2.87313 |
| H | 4.24954  | -2.78009 | -3.49182 |
| C | 2.84     | -1.53912 | -2.51171 |
| H | 3.44924  | -0.64245 | -2.64622 |
| C | 1.50648  | -1.33015 | -1.84771 |
| H | 1.08403  | -2.3102  | -1.58617 |
| C | 0.51284  | -0.67457 | -2.86298 |
| H | 0.43051  | -1.37577 | -3.70942 |
| H | 0.99454  | 0.23825  | -3.26706 |
| O | -0.75773 | -0.4035  | -2.36115 |

UM06/6-311+g(d,p)-SMD-water//UB3LYP/6-31G(d)-gas

HF=-2505.3533175

UB3LYP-D3/6-311+g(d,p)-SMD-water//UB3LYP/6-31G(d)-gas

HF = -2506.2656535

DLPNO-CCSD(T)/def2-TZVPP//uB3LYP/6-31G(d)-gas

HF = -2503.372425835385

$\Delta G_{\text{solv}} = -0.0221931$

C-TS<sub>B</sub>

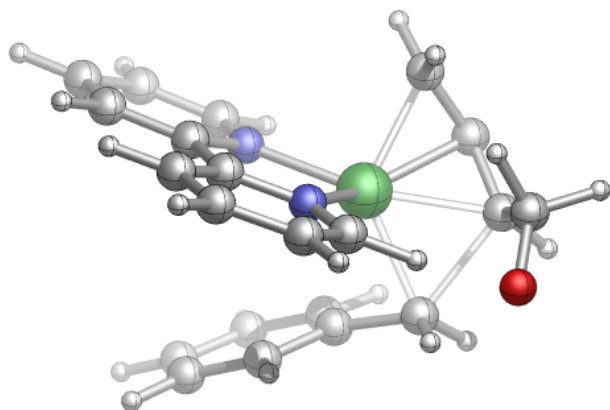

C-TS<sub>B</sub>

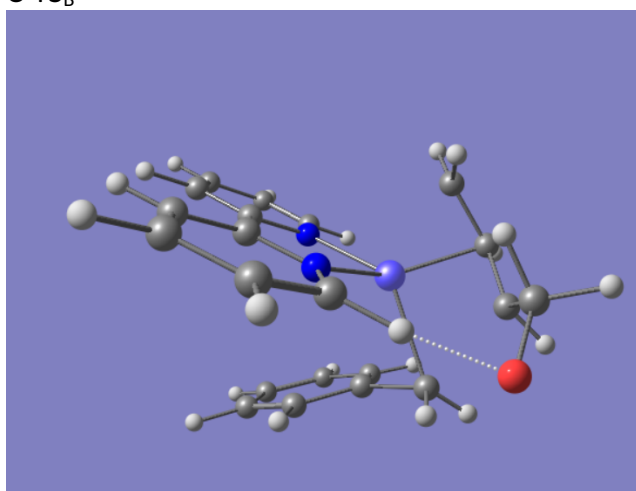

UB3LYP/6-31g(d)-gas

Imaginary frequency = -229.10 cm<sup>-1</sup>

Zero-point correction= 0.369235 (Hartree/Particle)

Thermal correction to Energy= 0.391133

Thermal correction to Enthalpy= 0.392077

Thermal correction to Gibbs Free Energy= 0.317630

Sum of electronic and zero-point Energies= -2505.303251

Sum of electronic and thermal Energies= -2505.281353

Sum of electronic and thermal Enthalpies= -2505.280409

Sum of electronic and thermal Free Energies= -2505.354856

|   |          |          |          |
|---|----------|----------|----------|
| C | -2.42248 | 1.29717  | 1.28299  |
| C | -0.74205 | 2.83838  | 0.79219  |
| C | -1.17536 | 3.6922   | 1.80077  |
| C | -2.27472 | 3.31918  | 2.57813  |
| C | -2.90506 | 2.10663  | 2.31821  |
| C | -3.0098  | -0.00289 | 0.89711  |
| C | -2.82347 | -1.84296 | -0.50009 |
| C | -3.94979 | -2.44874 | 0.04583  |
| C | -4.63322 | -1.77807 | 1.06156  |
| C | -4.15819 | -0.54446 | 1.49058  |

|    |          |          |          |
|----|----------|----------|----------|
| H  | 0.10881  | 3.04021  | 0.14631  |
| H  | -0.65703 | 4.62993  | 1.9733   |
| H  | -2.63439 | 3.96122  | 3.37697  |
| H  | -3.75519 | 1.79629  | 2.91556  |
| H  | -2.26142 | -2.32612 | -1.29386 |
| H  | -4.27943 | -3.41649 | -0.31768 |
| H  | -5.52195 | -2.20962 | 1.51267  |
| H  | -4.67711 | -0.00622 | 2.27559  |
| N  | -1.35508 | 1.66711  | 0.53837  |
| N  | -2.35576 | -0.65286 | -0.09711 |
| Ni | -0.73209 | 0.46974  | -0.93473 |
| C  | 0.71124  | -0.36628 | -2.34619 |
| H  | 1.27783  | -1.26669 | -2.57809 |
| C  | -0.6519  | -0.32698 | -2.82883 |
| H  | -1.13914 | -1.29055 | -2.98511 |
| C  | -1.4373  | 0.82503  | -2.91038 |
| H  | -0.99629 | 1.80771  | -3.0314  |
| C  | 0.73307  | -1.07707 | -0.27135 |
| H  | 1.36769  | -1.87508 | -0.66447 |
| C  | 0.42133  | -1.3514  | 1.14457  |
| C  | 0.10659  | -2.65276 | 1.58219  |
| C  | 0.43527  | -0.32517 | 2.10671  |
| C  | -0.16649 | -2.91424 | 2.922    |
| H  | 0.04502  | -3.44979 | 0.84642  |
| C  | 0.16198  | -0.5857  | 3.44963  |
| H  | 0.6829   | 0.68852  | 1.7965   |
| C  | -0.13812 | -1.88326 | 3.8663   |
| H  | -0.40826 | -3.92806 | 3.23236  |
| H  | 0.18908  | 0.22686  | 4.17196  |
| H  | -0.34954 | -2.08982 | 4.91221  |
| H  | 1.24062  | -0.12182 | -0.41524 |
| C  | 1.45577  | 0.95783  | -2.23765 |
| H  | -2.47208 | 0.71387  | -3.22633 |
| H  | 1.51421  | 1.41437  | -3.2036  |
| O  | 2.69285  | 0.73781  | -1.77201 |
| H  | 0.9326   | 1.60728  | -1.56727 |

UM06/6-311+g(d,p)-SMD-water//UB3LYP/6-31G(d)-gas  
HF=-2505.2794819  
UB3LYP-D3/6-311+g(d,p)-SMD-water//UB3LYP/6-31G(d)-gas  
HF = -2506.1862011  
DLPNO-CCSD(T)/def2-TZVPP//uB3LYP/6-31G(d)-gas  
HF = -2503.286377222440  
 $\Delta G_{\text{solv}} = -0.0366925$

CH-TS<sub>B</sub>

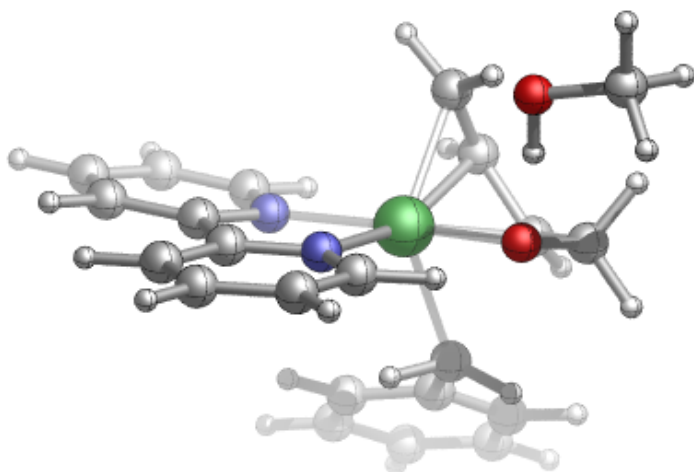

CH-TS<sub>B</sub>

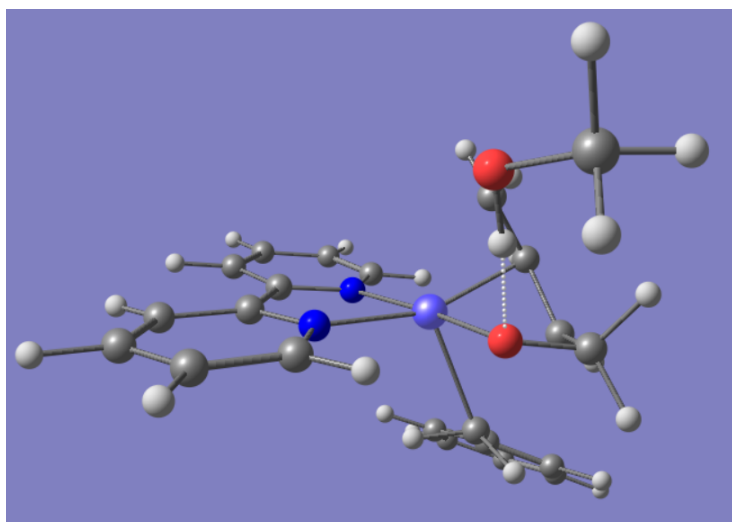

UB3LYP/6-31g(d)-gas

Imaginary frequency = -348.32 cm<sup>-1</sup>

Zero-point correction= 0.424888 (Hartree/Particle)

Thermal correction to Energy= 0.451155

Thermal correction to Enthalpy= 0.452100

Thermal correction to Gibbs Free Energy= 0.365281

Sum of electronic and zero-point Energies= -2621.033104

Sum of electronic and thermal Energies= -2621.006837

Sum of electronic and thermal Enthalpies= -2621.005893

Sum of electronic and thermal Free Energies= -2621.092711

C -0.82961 1.94453 1.64199

C 1.29757 2.77275 1.20205

C 1.22882 3.63829 2.29222

C 0.08009 3.64579 3.07632

C -0.96459 2.78253 2.75006

|    |          |          |          |
|----|----------|----------|----------|
| C  | -1.87408 | 0.9869   | 1.20161  |
| C  | -2.42957 | -0.67735 | -0.32054 |
| C  | -3.68697 | -0.85522 | 0.24536  |
| C  | -4.04097 | -0.06219 | 1.33454  |
| C  | -3.12467 | 0.86818  | 1.81586  |
| H  | 2.16266  | 2.72675  | 0.55497  |
| H  | 2.0688   | 4.2911   | 2.50308  |
| H  | -0.00715 | 4.30966  | 3.9313   |
| H  | -1.86452 | 2.76634  | 3.35405  |
| H  | -2.10849 | -1.26954 | -1.17115 |
| H  | -4.3655  | -1.59731 | -0.16186 |
| H  | -5.01532 | -0.16323 | 1.80301  |
| H  | -3.38498 | 1.49947  | 2.65716  |
| N  | 0.28811  | 1.9493   | 0.87837  |
| N  | -1.53882 | 0.21711  | 0.13816  |
| Ni | 0.24251  | 0.708    | -0.71581 |
| C  | 1.4421   | -0.25802 | -2.27185 |
| H  | 1.67408  | -1.27777 | -2.57048 |
| C  | 0.11912  | 0.17135  | -2.67413 |
| H  | -0.58201 | -0.62343 | -2.9321  |
| C  | -0.35372 | 1.4863   | -2.56958 |
| H  | 0.32097  | 2.33353  | -2.62301 |
| C  | 1.7393   | -0.84824 | -0.1736  |
| H  | 2.7823   | -0.58143 | -0.30842 |
| C  | 1.47856  | -2.30476 | -0.14991 |
| C  | 2.34968  | -3.20828 | -0.79034 |
| C  | 0.35758  | -2.84613 | 0.50885  |
| C  | 2.11295  | -4.5819  | -0.77385 |
| H  | 3.23506  | -2.82238 | -1.29118 |
| C  | 0.11769  | -4.21907 | 0.52642  |
| H  | -0.32464 | -2.17749 | 1.02845  |
| C  | 0.99284  | -5.09673 | -0.11789 |
| H  | 2.80973  | -5.25317 | -1.2697  |
| H  | -0.75214 | -4.60685 | 1.05162  |
| H  | 0.80838  | -6.16742 | -0.10235 |
| H  | 1.41649  | -0.40052 | 0.77103  |
| C  | 2.50616  | 0.81155  | -2.29862 |
| O  | 2.10117  | 1.68633  | -1.27629 |
| H  | -1.38763 | 1.68791  | -2.84052 |
| H  | 2.51146  | 1.31288  | -3.28034 |
| H  | 3.51704  | 0.40237  | -2.13708 |
| H  | 4.57391  | 3.71551  | -1.07058 |
| C  | 3.65336  | 4.35414  | -1.05648 |
| O  | 2.61851  | 3.91522  | -1.84418 |
| H  | 4.00005  | 5.36201  | -1.36589 |
| H  | 2.36024  | 2.80252  | -1.56068 |



H 3.41776 4.47063 0.04056

UM06/6-311+g(d,p)-SMD-water//UB3LYP/6-31G(d)-gas  
HF = -2621.007

UB3LYP-D3/6-311+g(d,p)-SMD-water//UB3LYP/6-31G(d)-gas  
HF = -2621.9977

DLPNO-CCSD(T)/def2-TZVPP//uB3LYP/6-31G(d)-gas

HF = -2618.9044

$\Delta G_{\text{solv}} = -0.0229495$

C-TS<sub>L</sub>

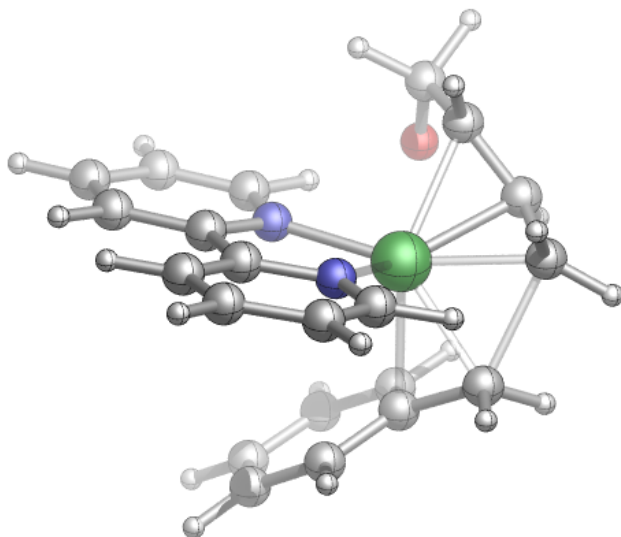

C-TS<sub>L</sub>

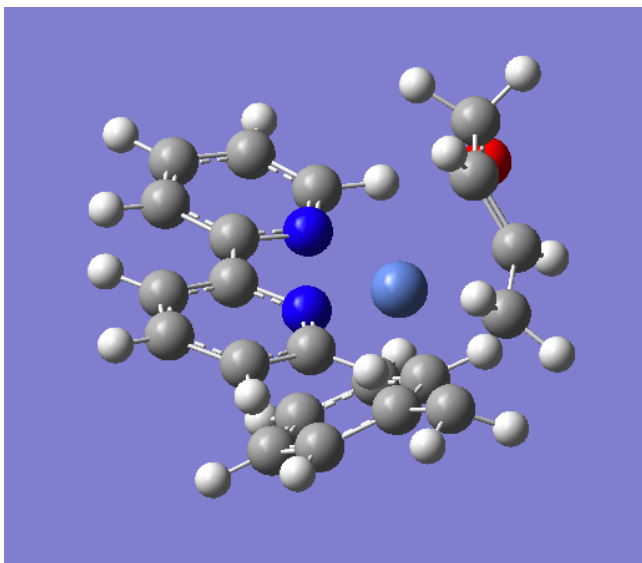

UB3LYP/6-31g(d)-gas

Imaginary frequency =  $-293.16 \text{ cm}^{-1}$

Zero-point correction= 0.368710 (Hartree/Particle)

Thermal correction to Energy= 0.390876

Thermal correction to Enthalpy= 0.391820

Thermal correction to Gibbs Free Energy= 0.316349

Sum of electronic and zero-point Energies= -2505.302047

Sum of electronic and thermal Energies= -2505.279881

Sum of electronic and thermal Enthalpies= -2505.278937

Sum of electronic and thermal Free Energies= -2505.354409

|    |          |          |          |
|----|----------|----------|----------|
| C  | -1.5686  | 2.18377  | 1.56507  |
| C  | 0.48993  | 3.16267  | 1.12464  |
| C  | 0.24254  | 4.21694  | 1.99655  |
| C  | -0.97821 | 4.24194  | 2.6723   |
| C  | -1.89019 | 3.214    | 2.45568  |
| C  | -2.45577 | 1.03657  | 1.26535  |
| C  | -2.79101 | -0.78066 | -0.17297 |
| C  | -3.99554 | -1.0848  | 0.46584  |
| C  | -4.4183  | -0.31677 | 1.5476   |
| C  | -3.64613 | 0.77361  | 1.9441   |
| H  | 1.42902  | 3.09501  | 0.58206  |
| H  | 0.98586  | 4.99473  | 2.13694  |
| H  | -1.21627 | 5.04881  | 3.35906  |
| H  | -2.84452 | 3.21489  | 2.96958  |
| H  | -2.42244 | -1.27389 | -1.11724 |
| H  | -4.59119 | -1.91573 | 0.10044  |
| H  | -5.34461 | -0.54507 | 2.06815  |
| H  | -3.9669  | 1.39915  | 2.76996  |
| N  | -0.38662 | 2.17274  | 0.90088  |
| N  | -2.02951 | 0.24881  | 0.25039  |
| Ni | -0.19004 | 0.6344   | -0.41963 |

|   |          |          |          |
|---|----------|----------|----------|
| C | 1.59975  | 0.86222  | -1.53699 |
| H | 1.61552  | 1.9527   | -1.44818 |
| H | 2.60094  | 0.49015  | -1.74143 |
| C | 0.50411  | 0.2676   | -2.30966 |
| H | 0.54351  | -0.80218 | -2.52213 |
| C | -0.71548 | 0.86697  | -2.56437 |
| H | -0.81131 | 1.95671  | -2.60589 |
| C | -1.84257 | -0.02524 | -3.10219 |
| H | -1.89372 | 0.22259  | -4.20024 |
| C | 1.80391  | -0.08757 | 0.1788   |
| H | 2.69434  | 0.47818  | 0.45657  |
| H | -2.79166 | 0.44454  | -2.70441 |
| O | -1.66998 | -1.32226 | -2.81474 |
| C | 1.04653  | -0.51513 | 1.40651  |
| C | 1.2531   | 0.0947   | 2.65814  |
| C | 0.19528  | -1.64314 | 1.35905  |
| C | 0.60039  | -0.36669 | 3.79975  |
| H | 1.93922  | 0.93537  | 2.73278  |
| C | -0.46137 | -2.09845 | 2.49761  |
| H | 0.04266  | -2.15173 | 0.40924  |
| C | -0.2679  | -1.45926 | 3.7263   |
| H | 0.78171  | 0.12025  | 4.75502  |
| H | -1.11869 | -2.9614  | 2.42837  |
| H | -0.77126 | -1.82063 | 4.61886  |
| H | 2.0981   | -0.97851 | -0.37641 |

UM06/6-311+g(d,p)-SMD-water//UB3LYP/6-31G(d)-gas  
HF=-2505.287780  
UB3LYP-D3/6-311+g(d,p)-SMD-water//UB3LYP/6-31G(d)-gas  
HF = -2506.1928851  
DLPNO-CCSD(T)/def2-TZVPP//uB3LYP/6-31G(d)-gas

HF = -2503.284994203000

$\Delta G_{\text{solv}} = -0.0445728$

CH-TS<sub>L</sub>

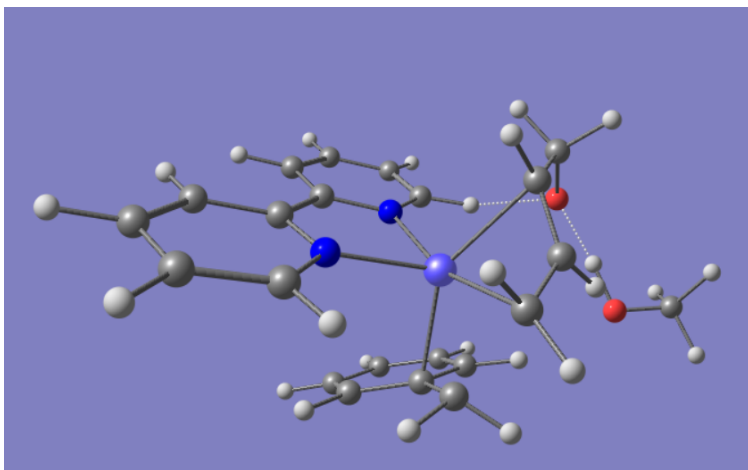

UB3LYP/6-31g(d)-gas

Imaginary frequency =  $-287.04 \text{ cm}^{-1}$

Zero-point correction= 0.423290 (Hartree/Particle)

Thermal correction to Energy= 0.449618

Thermal correction to Enthalpy= 0.450562

Thermal correction to Gibbs Free Energy= 0.365002

Sum of electronic and zero-point Energies= -2620.999177

Sum of electronic and thermal Energies= -2620.972849

Sum of electronic and thermal Enthalpies= -2620.971905

Sum of electronic and thermal Free Energies= -2621.057465

|    |          |          |          |
|----|----------|----------|----------|
| C  | -0.7467  | 1.87713  | 0.88217  |
| C  | 1.30271  | 2.79721  | 0.30286  |
| C  | 1.09197  | 3.9204   | 1.09392  |
| C  | -0.10202 | 4.00889  | 1.8107   |
| C  | -1.02787 | 2.97753  | 1.70112  |
| C  | -1.67356 | 0.74229  | 0.68273  |
| C  | -2.00786 | -1.25839 | -0.48594 |
| C  | -3.26643 | -1.4135  | 0.10074  |
| C  | -3.72785 | -0.46078 | 1.004    |
| C  | -2.92541 | 0.64174  | 1.29295  |
| H  | 2.21954  | 2.68646  | -0.26828 |
| H  | 1.8444   | 4.70059  | 1.14287  |
| H  | -0.30958 | 4.86713  | 2.44287  |
| H  | -1.96248 | 3.02845  | 2.24741  |
| H  | -1.59112 | -1.93222 | -1.27596 |
| H  | -3.87313 | -2.27225 | -0.16897 |
| H  | -4.70465 | -0.55881 | 1.47012  |
| H  | -3.27511 | 1.40581  | 1.97809  |
| N  | 0.41838  | 1.79304  | 0.19053  |
| N  | -1.22708 | -0.20407 | -0.17647 |
| Ni | 0.63481  | 0.04174  | -0.88489 |
| C  | 2.27372  | 0.4421   | -2.17851 |
| H  | 2.10262  | 1.52138  | -2.19932 |

|   |          |          |          |
|---|----------|----------|----------|
| H | 3.31074  | 0.22226  | -2.41555 |
| C | 1.26077  | -0.39369 | -2.80483 |
| H | 1.45318  | -1.45955 | -2.92274 |
| C | -0.03166 | 0.00455  | -3.04031 |
| H | -0.27693 | 1.06374  | -3.16456 |
| C | -1.07361 | -1.07397 | -3.37052 |
| H | -1.16439 | -1.05431 | -4.49359 |
| C | 2.66877  | -0.31479 | -0.29355 |
| H | 3.16367  | 0.52236  | 0.19969  |
| H | -2.05762 | -0.61964 | -3.04034 |
| C | 1.82646  | -1.13329 | 0.62883  |
| C | 1.578    | -0.73255 | 1.96286  |
| C | 1.34201  | -2.39476 | 0.21334  |
| C | 0.84006  | -1.53503 | 2.82364  |
| H | 1.97683  | 0.2165   | 2.31342  |
| C | 0.58807  | -3.18757 | 1.0802   |
| H | 1.54273  | -2.74972 | -0.79271 |
| C | 0.33178  | -2.76496 | 2.38383  |
| H | 0.66817  | -1.2101  | 3.847    |
| H | 0.2088   | -4.14304 | 0.72906  |
| H | -0.24546 | -3.39005 | 3.05967  |
| H | 3.40644  | -0.95616 | -0.76933 |
| H | 0.7184   | -6.56556 | -1.47765 |
| O | -0.0874  | -4.79406 | -2.26315 |
| O | -0.8563  | -2.42246 | -2.86325 |
| C | 0.5812   | -5.97316 | -2.42125 |
| H | -0.6177  | -3.30446 | -3.23375 |
| H | 0.0905   | -6.69176 | -3.12195 |
| H | 1.6238   | -5.85936 | -2.82855 |

UM06/6-311+g(d,p)-SMD-water//UB3LYP/6-31G(d)-gas  
HF= -2620.9982

UB3LYP-D3/6-311+g(d,p)-SMD-water//UB3LYP/6-31G(d)-gas  
HF = -2621.9847

DLPNO-CCSD(T)/def2-TZVPP//uB3LYP/6-31G(d)-gas

HF = -2618.8747

$\Delta G_{\text{solv}} = -0.0340259$

B''-TSL

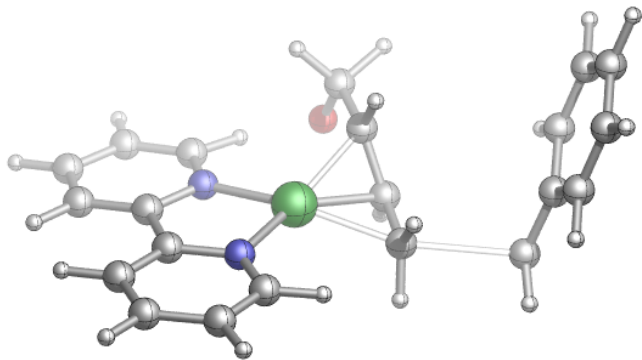

B''-TSL

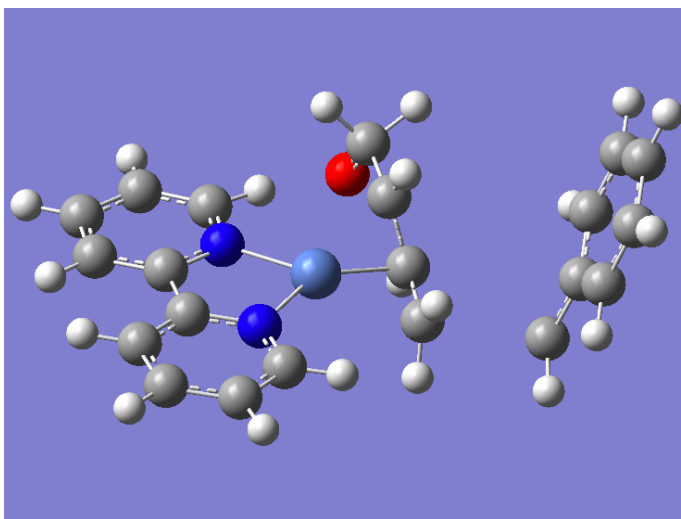

UB3LYP/6-31g(d)-gas

Imaginary frequency =  $-636.59 \text{ cm}^{-1}$

Zero-point correction= 0.365804 (Hartree/Particle)

Thermal correction to Energy= 0.388564

Thermal correction to Enthalpy= 0.389508

Thermal correction to Gibbs Free Energy= 0.310314

Sum of electronic and zero-point Energies= -2505.299320

Sum of electronic and thermal Energies= -2505.276559

Sum of electronic and thermal Enthalpies= -2505.275615

Sum of electronic and thermal Free Energies= -2505.354809

|   |          |          |         |
|---|----------|----------|---------|
| C | -0.92081 | 0.98226  | 2.85884 |
| C | 0.67014  | 2.31217  | 1.794   |
| C | 0.47953  | 3.35274  | 2.69422 |
| C | -0.45476 | 3.1855   | 3.71796 |
| C | -1.15798 | 1.98782  | 3.79956 |
| C | -1.5887  | -0.3339  | 2.85009 |
| C | -1.72129 | -2.37911 | 1.70945 |
| C | -2.60446 | -2.87359 | 2.6738  |
| C | -2.98004 | -2.07177 | 3.74791 |

|    |          |          |          |
|----|----------|----------|----------|
| C  | -2.46364 | -0.77945 | 3.84019  |
| H  | 1.38905  | 2.39112  | 0.98607  |
| H  | 1.05273  | 4.26801  | 2.59223  |
| H  | -0.63389 | 3.97557  | 4.44093  |
| H  | -1.89076 | 1.83878  | 4.58437  |
| H  | -1.33493 | -2.98137 | 0.84436  |
| H  | -2.98485 | -3.8845  | 2.56672  |
| H  | -3.65853 | -2.44172 | 4.51178  |
| H  | -2.72919 | -0.1412  | 4.6758   |
| N  | -0.00759 | 1.15114  | 1.86035  |
| N  | -1.23443 | -1.12306 | 1.80007  |
| Ni | 0.04227  | -0.29963 | 0.59114  |
| C  | 1.83921  | -0.03604 | -0.58031 |
| H  | 1.571    | 0.90726  | -1.04641 |
| H  | 2.68603  | -0.02865 | 0.09911  |
| C  | 1.08032  | -1.2273  | -0.79853 |
| H  | 1.43511  | -2.2025  | -0.46333 |
| C  | -0.23453 | -1.18673 | -1.25843 |
| H  | -0.58624 | -0.31939 | -1.83027 |
| C  | -1.03659 | -2.48073 | -1.36483 |
| H  | -1.07585 | -2.68547 | -2.47363 |
| C  | 3.20106  | -0.11228 | -2.04303 |
| H  | 3.36256  | -1.17159 | -1.87679 |
| H  | -2.10453 | -2.16932 | -1.14588 |
| O  | -0.57116 | -3.48718 | -0.62193 |
| C  | 2.52945  | 0.31832  | -3.23213 |
| C  | 1.74914  | -0.58196 | -4.00078 |
| C  | 2.58448  | 1.66945  | -3.65929 |
| C  | 1.06791  | -0.15095 | -5.13345 |
| H  | 1.68558  | -1.62149 | -3.69098 |
| C  | 1.90408  | 2.09253  | -4.79435 |
| H  | 3.18104  | 2.37834  | -3.08843 |
| C  | 1.1401   | 1.18622  | -5.5396  |
| H  | 0.47627  | -0.86082 | -5.70572 |
| H  | 1.96966  | 3.13213  | -5.10621 |
| H  | 0.60908  | 1.51847  | -6.4274  |
| H  | 3.91701  | 0.55573  | -1.57185 |

UM06/6-311+g(d,p)-SMD-water//UB3LYP/6-31G(d)-gas

HF=-2505.2737072

UB3LYP-D3/6-311+g(d,p)-SMD-water//UB3LYP/6-31G(d)-gas

HF=-2506.1837374

DLPNO-CCSD(T)/def2-TZVPP//uB3LYP/6-31G(d)-gas

HF = -2503.267387295916

$\Delta G_{\text{solv}} = -0.0452782$

BH-TSL

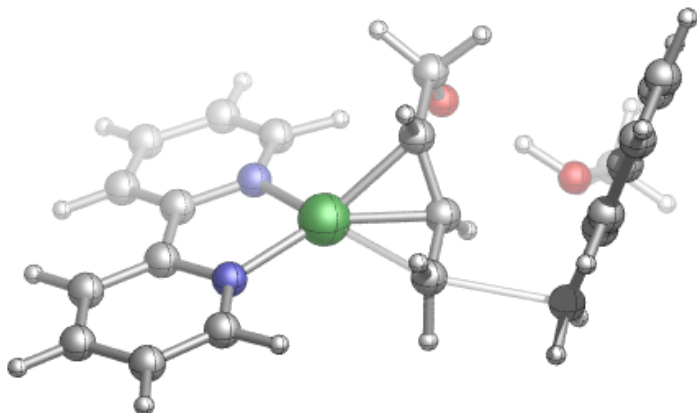

BH-TSL

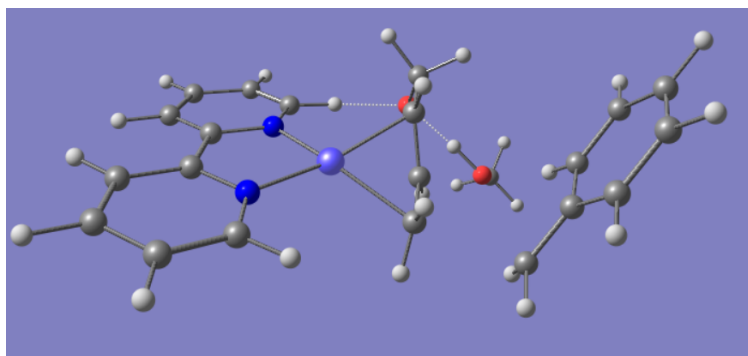

UB3LYP/6-31g(d)-gas

Imaginary frequency = 619.59  $\text{cm}^{-1}$

Zero-point correction= 0.420604 (Hartree/Particle)

Thermal correction to Energy= 0.447585

Thermal correction to Enthalpy= 0.448530

Thermal correction to Gibbs Free Energy= 0.359079

Sum of electronic and zero-point Energies= -2620.993664

Sum of electronic and thermal Energies= -2620.966683

Sum of electronic and thermal Enthalpies= -2620.965739

Sum of electronic and thermal Free Energies= -2621.055190

|   |          |          |         |
|---|----------|----------|---------|
| C | -1.126   | 1.59829  | 3.24424 |
| C | 0.63832  | 2.93524  | 2.49797 |
| C | 0.3049   | 3.95845  | 3.37295 |
| C | -0.80369 | 3.78481  | 4.21287 |
| C | -1.51951 | 2.5956   | 4.14501 |
| C | -1.77827 | 0.29144  | 3.10729 |
| C | -1.69937 | -1.75898 | 1.97797 |
| C | -2.71252 | -2.28077 | 2.78111 |
| C | -3.28573 | -1.47021 | 3.76335 |
| C | -2.80447 | -0.17511 | 3.93525 |



|    |          |          |          |
|----|----------|----------|----------|
| H  | 1.48883  | 3.02669  | 1.83108  |
| H  | 0.899    | 4.86555  | 3.39524  |
| H  | -1.09945 | 4.56601  | 4.90799  |
| H  | -2.38231 | 2.44077  | 4.78374  |
| H  | -1.1858  | -2.35783 | 1.22191  |
| H  | -3.03466 | -3.30608 | 2.63023  |
| H  | -4.08284 | -1.84731 | 4.39869  |
| H  | -3.21062 | 0.45783  | 4.71629  |
| N  | -0.04941 | 1.77845  | 2.41615  |
| N  | -1.25948 | -0.49182 | 2.1152   |
| Ni | 0.13765  | 0.37266  | 1.09642  |
| C  | 1.84503  | 1.0602   | -0.07536 |
| H  | 1.32233  | 1.94318  | -0.43164 |
| H  | 2.70009  | 1.21842  | 0.57513  |
| C  | 1.3538   | -0.2518  | -0.32865 |
| H  | 1.94524  | -1.12602 | -0.06533 |
| C  | 0.03523  | -0.44104 | -0.75688 |
| H  | -0.46248 | 0.38259  | -1.28232 |
| C  | -0.51307 | -1.80804 | -1.06598 |
| H  | -0.3117  | -2.02233 | -2.13257 |
| C  | 3.27408  | 1.47438  | -1.86464 |
| H  | 3.93114  | 0.64801  | -1.60712 |
| H  | -1.62055 | -1.78199 | -0.97876 |
| O  | 0.0685   | -2.7562  | -0.22666 |
| C  | 2.469    | 1.38377  | -3.04951 |
| C  | 2.23277  | 0.12992  | -3.67333 |
| C  | 1.84585  | 2.52873  | -3.61163 |
| C  | 1.42337  | 0.03148  | -4.80104 |
| H  | 2.69707  | -0.76437 | -3.26041 |
| C  | 1.03989  | 2.42532  | -4.74045 |
| H  | 2.01541  | 3.50305  | -3.15265 |
| C  | 0.82275  | 1.17618  | -5.34294 |
| H  | 1.25962  | -0.94158 | -5.26115 |
| H  | 0.57977  | 3.31852  | -5.15929 |
| H  | 0.19206  | 1.09798  | -6.2251  |
| H  | 3.59126  | 2.45445  | -1.51331 |
| H  | 0.07136  | -3.66199 | -0.73709 |
| H  | -0.84    | -6.70154 | -0.85571 |
| C  | -1.0556  | -5.64312 | -1.1517  |
| O  | 0.07536  | -4.92419 | -1.44835 |
| H  | -1.7696  | -5.7243  | -2.01473 |
| H  | -1.65254 | -5.21138 | -0.31179 |

UM06/6-311+g(d,p)-SMD-water//UB3LYP/6-31G(d)-gas  
HF= -2620.986

UB3LYP-D3/6-311+g(d,p)-SMD-water//UB3LYP/6-31G(d)-gas  
HF = -2621.9764

DLPNO-CCSD(T)/def2-TZVPP//uB3LYP/6-31G(d)-gas  
HF = -2618.8572

$\Delta G_{\text{solv}} = -0.0368533$

B-TSB

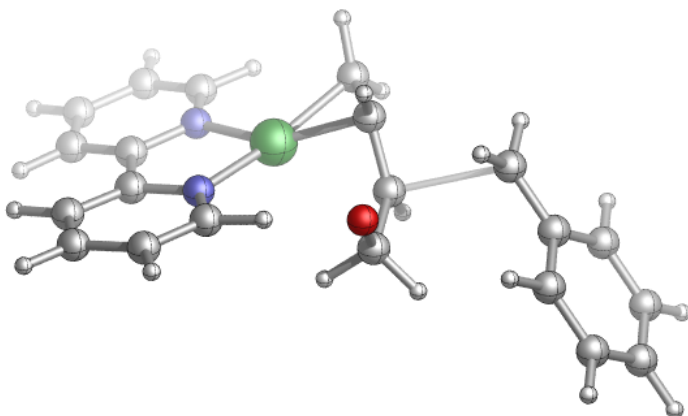

B-TSB

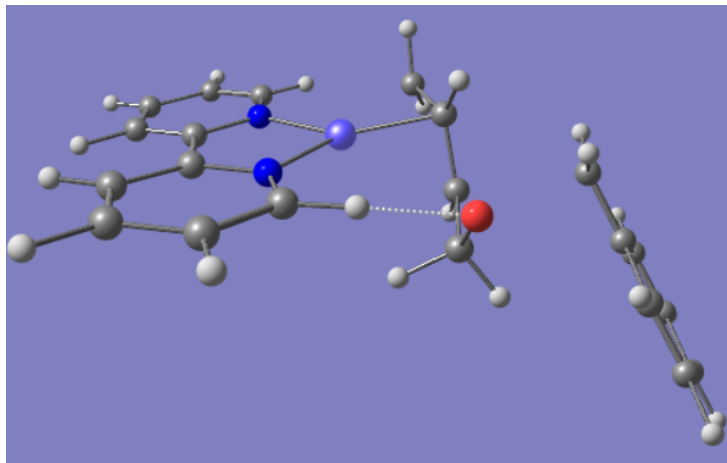

UB3LYP/6-31g(d)-gas

Imaginary frequency =  $-469.64 \text{ cm}^{-1}$

Zero-point correction = 0.367811 (Hartree/Particle)

Thermal correction to Energy = 0.390034

Thermal correction to Enthalpy = 0.390978

Thermal correction to Gibbs Free Energy = 0.313856

Sum of electronic and zero-point Energies = -2505.299873

Sum of electronic and thermal Energies = -2505.277651

Sum of electronic and thermal Enthalpies = -2505.276707

|                                              |                            |
|----------------------------------------------|----------------------------|
| Sum of electronic and thermal Free Energies= | -2505.353829               |
| C                                            | -1.80936 0.7111 2.99187    |
| C                                            | -1.90017 1.86364 0.95515   |
| C                                            | -2.54453 2.93768 1.57502   |
| C                                            | -2.8104 2.89256 2.94046    |
| C                                            | -2.43832 1.75954 3.66263   |
| C                                            | -1.44326 -0.57421 3.61927  |
| C                                            | -0.64935 -2.72612 3.19952  |
| C                                            | -0.75578 -3.07952 4.53942  |
| C                                            | -1.22673 -2.12901 5.44609  |
| C                                            | -1.5761 -0.86538 4.97888   |
| H                                            | -1.68401 1.84452 -0.13999  |
| H                                            | -2.82344 3.79752 0.97445   |
| H                                            | -3.30753 3.71876 3.44117   |
| H                                            | -2.65075 1.69117 4.72384   |
| H                                            | -0.29552 -3.42657 2.45206  |
| H                                            | -0.47626 -4.07793 4.85854  |
| H                                            | -1.32186 -2.36744 6.50117  |
| H                                            | -1.94382 -0.11193 5.66614  |
| N                                            | -1.53086 0.77298 1.66148   |
| N                                            | -0.97799 -1.50488 2.74006  |
| Ni                                           | -0.76297 -0.87133 0.95418  |
| C                                            | 0.41297 -0.30447 -1.02147  |
| H                                            | 1.39382 -0.63414 -0.66391  |
| C                                            | -0.65951 -1.22253 -0.95821 |
| H                                            | -1.58519 -0.92645 -1.44929 |
| C                                            | -0.52708 -2.42792 -0.19993 |
| H                                            | 0.45938 -2.89375 -0.13545  |
| C                                            | 0.21831 1.20021 -1.2196    |
| H                                            | 1.12319 1.57262 -1.76076   |
| C                                            | 0.66427 -0.70089 -3.35107  |
| H                                            | -0.28173 -0.171 -3.38089   |
| H                                            | 0.41698 1.60604 -0.17461   |
| O                                            | -0.95872 1.53941 -1.74422  |
| C                                            | 1.83659 -0.04723 -3.82354  |
| C                                            | 1.81382 1.35087 -4.08341   |
| C                                            | 3.05041 -0.74892 -4.04597  |
| C                                            | 2.94891 1.99907 -4.55637   |
| H                                            | 0.88872 1.89324 -3.90404   |
| C                                            | 4.17758 -0.09106 -4.51736  |
| H                                            | 3.07832 -1.81968 -3.85271  |
| C                                            | 4.13389 1.28652 -4.77636   |
| H                                            | 2.91443 3.06715 -4.75599   |
| H                                            | 5.09646 -0.64603 -4.69033  |
| H                                            | 5.01747 1.79841 -5.14845   |
| H                                            | 0.6398 -1.7848 -3.29719    |

H -1.34407 -3.14984 -0.23024  
 UM06/6-311+g(d,p)-SMD-water//UB3LYP/6-31G(d)-gas  
 HF=-2505.2692424  
 UB3LYP-D3/6-311+g(d,p)-SMD-water//UB3LYP/6-31G(d)-gas  
 HF=-2506.1777816  
 DLPNO-CCSD(T)/def2-TZVPP//uB3LYP/6-31G(d)-gas  
 HF = -2503.270786690197  
 $\Delta G_{\text{solv}} = -0.0372232$

BH-TSB

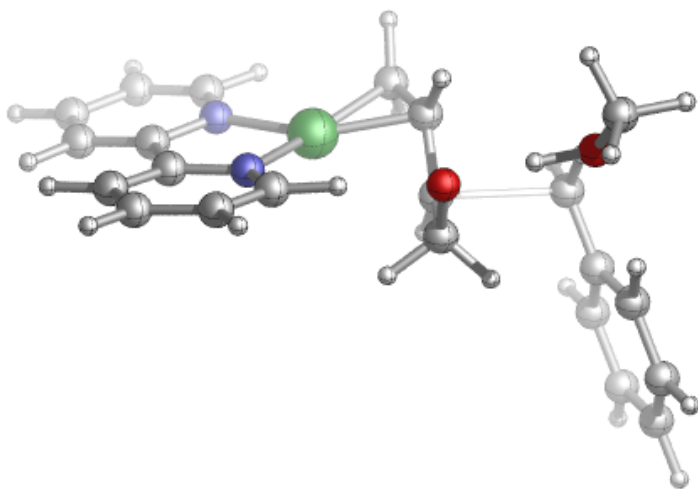

BH-TSB

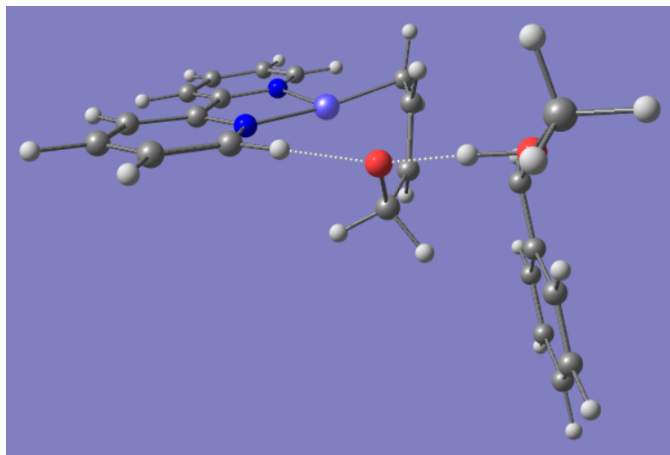

UB3LYP/6-31g(d)-gas  
 Imaginary frequency =  $-456.51 \text{ cm}^{-1}$   
 Zero-point correction= 0.421862 (Hartree/Particle)  
 Thermal correction to Energy= 0.448464  
 Thermal correction to Enthalpy= 0.449408  
 Thermal correction to Gibbs Free Energy= 0.360831  
 Sum of electronic and zero-point Energies= -2620.994637  
 Sum of electronic and thermal Energies= -2620.968035

|                                              |                            |
|----------------------------------------------|----------------------------|
| Sum of electronic and thermal Enthalpies=    | -2620.967091               |
| Sum of electronic and thermal Free Energies= | -2621.055668               |
| C                                            | -1.03211 0.71352 3.51861   |
| C                                            | -1.29912 2.15956 1.70403   |
| C                                            | -1.59765 3.22426 2.55114   |
| C                                            | -1.59239 3.01604 3.93116   |
| C                                            | -1.31743 1.74346 4.41893   |
| C                                            | -0.81484 -0.686 3.90093    |
| C                                            | -0.57314 -2.85944 3.08736  |
| C                                            | -0.47287 -3.37895 4.37158  |
| C                                            | -0.54198 -2.50231 5.45979  |
| C                                            | -0.71554 -1.14498 5.21738  |
| H                                            | -1.32425 2.26207 0.62119   |
| H                                            | -1.83566 4.193 2.1253      |
| H                                            | -1.81797 3.82676 4.61795   |
| H                                            | -1.34507 1.54921 5.48556   |
| H                                            | -0.52799 -3.49926 2.21429  |
| H                                            | -0.3434 -4.44657 4.51266   |
| H                                            | -0.46177 -2.87087 6.47766  |
| H                                            | -0.76822 -0.44593 6.04429  |
| N                                            | -0.99552 0.93287 2.17142   |
| N                                            | -0.73596 -1.54429 2.83928  |
| Ni                                           | -0.67977 -0.67589 1.14115  |
| C                                            | 0.38881 -0.08032 -0.86912  |
| H                                            | 1.32963 -0.46756 -0.48146  |
| C                                            | -0.77566 -0.88654 -0.80638 |
| H                                            | -1.69612 -0.49324 -1.26716 |
| C                                            | -0.70172 -2.14405 -0.139   |
| H                                            | 0.24317 -2.6962 -0.14489   |
| C                                            | 0.35626 1.39941 -1.18947   |
| H                                            | 0.98097 1.5834 -2.07754    |
| C                                            | 1.12435 -0.94987 -2.92079  |
| H                                            | 0.1719 -0.72452 -3.39399   |
| H                                            | 0.82482 1.96238 -0.36987   |
| O                                            | -0.93852 1.92235 -1.3454   |
| C                                            | 2.2998 -0.24884 -3.32791   |
| C                                            | 2.21495 0.89401 -4.16818   |
| C                                            | 3.58696 -0.64497 -2.88115  |
| C                                            | 3.35701 1.59583 -4.53752   |
| H                                            | 1.24071 1.20467 -4.53862   |
| C                                            | 4.7219 0.06157 -3.25324    |
| H                                            | 3.67568 -1.52073 -2.24217  |
| C                                            | 4.61513 1.18693 -4.08176   |
| H                                            | 3.26978 2.46283 -5.18757   |
| H                                            | 5.69835 -0.2629 -2.90337   |
| H                                            | 5.50666 1.73577 -4.37311   |

|   |          |          |          |
|---|----------|----------|----------|
| H | 1.21116  | -1.94205 | -2.48533 |
| H | -1.58152 | -2.78461 | -0.16251 |
| H | -1.41267 | 1.49889  | -2.11828 |
| H | -3.56323 | -1.33813 | -2.97248 |
| C | -3.79634 | -0.24442 | -3.03711 |
| O | -2.74082 | 0.52754  | -2.63024 |
| H | -4.10729 | -0.06473 | -4.0946  |
| H | -4.71146 | -0.10813 | -2.41146 |

UM06/6-311+g(d,p)-SMD-water//UB3LYP/6-31G(d)-gas  
 HF= -2620.9837

UB3LYP-D3/6-311+g(d,p)-SMD-water//UB3LYP/6-31G(d)-gas  
 HF= -2621.9729

DLPNO-CCSD(T)/def2-TZVPP//uB3LYP/6-31G(d)-gas  
 HF = -2618.8588

$\Delta G_{\text{solv}} = -0.031814$

A''

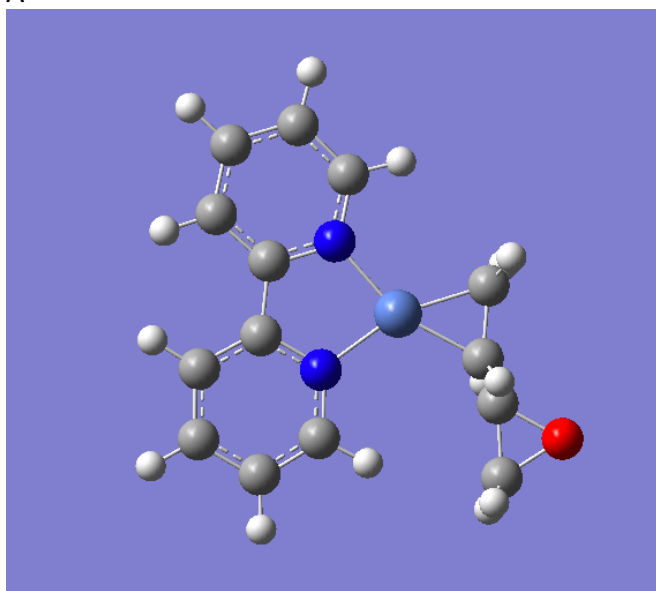

UB3LYP/6-31g(d)-gas

|                                            |                             |
|--------------------------------------------|-----------------------------|
| Zero-point correction=                     | 0.252481 (Hartree/Particle) |
| Thermal correction to Energy=              | 0.268299                    |
| Thermal correction to Enthalpy=            | 0.269244                    |
| Thermal correction to Gibbs Free Energy=   | 0.207211                    |
| Sum of electronic and zero-point Energies= | -2234.523418                |
| Sum of electronic and thermal Energies=    | -2234.507600                |
| Sum of electronic and thermal Enthalpies=  | -2234.506656                |

Sum of electronic and thermal Free Energies= -2234.568688

|    |          |          |          |
|----|----------|----------|----------|
| C  | -2.09139 | 2.31433  | 0.86226  |
| C  | -0.60045 | 2.29548  | 2.65039  |
| C  | -1.34907 | 3.2387   | 3.34487  |
| C  | -2.51948 | 3.72874  | 2.76326  |
| C  | -2.89366 | 3.25707  | 1.50751  |
| C  | -2.36718 | 1.74219  | -0.47025 |
| C  | -1.59    | 0.23902  | -2.07149 |
| C  | -2.62395 | 0.56782  | -2.94186 |
| C  | -3.56447 | 1.51936  | -2.54539 |
| C  | -3.42795 | 2.11877  | -1.29569 |
| H  | 0.30859  | 1.87258  | 3.06297  |
| H  | -1.01858 | 3.57672  | 4.32156  |
| H  | -3.13207 | 4.46249  | 3.27829  |
| H  | -3.80343 | 3.61582  | 1.03871  |
| H  | -0.81183 | -0.46833 | -2.33986 |
| H  | -2.68287 | 0.08483  | -3.91175 |
| H  | -4.38439 | 1.79863  | -3.20026 |
| H  | -4.13605 | 2.87402  | -0.97226 |
| N  | -0.94936 | 1.83577  | 1.43434  |
| N  | -1.46337 | 0.79615  | -0.85248 |
| Ni | -0.13439 | 0.41052  | 0.46111  |
| C  | 1.16771  | -0.16166 | 2.17333  |
| H  | 1.78899  | 0.70341  | 1.93011  |
| C  | 0.53731  | -0.90572 | 1.06587  |
| H  | 1.44649  | -0.66908 | 2.95621  |
| H  | 0.37552  | -1.85849 | 1.18485  |
| C  | 0.99399  | -0.57334 | -0.36681 |
| C  | 0.6564   | -1.5233  | -1.47899 |
| H  | 1.97313  | -0.06313 | -0.37557 |
| H  | 0.75491  | -1.18219 | -2.52445 |
| H  | -0.19424 | -2.2159  | -1.35341 |
| O  | 1.79401  | -2.7243  | -1.61709 |

UM06/6-311+g(d,p)-SMD-water//UB3LYP/6-31G(d)-gas

HF=-2234.5095924

UB3LYP-D3/6-311+g(d,p)-SMD-water//UB3LYP/6-31G(d)-gas

HF=-2235.1741033

DLPNO-CCSD(T)/def2-TZVPP//uB3LYP/6-31G(d)-gas

HF = -2232.882939502140

$\Delta G_{\text{solv}} = -0.0206952$

A''-2

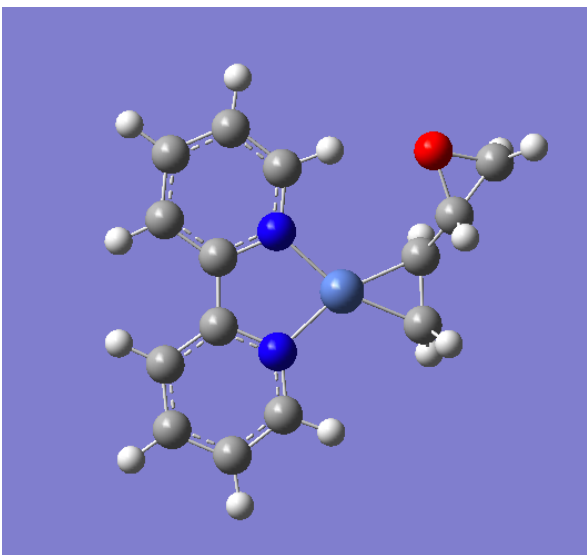

UB3LYP/6-31g(d)-gas

Zero-point correction= 0.252843 (Hartree/Particle)  
 Thermal correction to Energy= 0.268511  
 Thermal correction to Enthalpy= 0.269455  
 Thermal correction to Gibbs Free Energy= 0.208499  
 Sum of electronic and zero-point Energies= -2234.527567  
 Sum of electronic and thermal Energies= -2234.511899  
 Sum of electronic and thermal Enthalpies= -2234.510955  
 Sum of electronic and thermal Free Energies= -2234.571911

|    |          |          |          |
|----|----------|----------|----------|
| C  | -2.09139 | 2.31433  | 0.86226  |
| C  | -0.60045 | 2.29548  | 2.65039  |
| C  | -1.34907 | 3.2387   | 3.34487  |
| C  | -2.51948 | 3.72874  | 2.76326  |
| C  | -2.89366 | 3.25707  | 1.50751  |
| C  | -2.36718 | 1.74219  | -0.47025 |
| C  | -1.59    | 0.23902  | -2.07149 |
| C  | -2.62395 | 0.56782  | -2.94186 |
| C  | -3.56447 | 1.51936  | -2.54539 |
| C  | -3.42795 | 2.11877  | -1.29569 |
| H  | 0.30859  | 1.87258  | 3.06297  |
| H  | -1.01858 | 3.57672  | 4.32156  |
| H  | -3.13207 | 4.46249  | 3.27829  |
| H  | -3.80343 | 3.61582  | 1.03871  |
| H  | -0.81183 | -0.46833 | -2.33986 |
| H  | -2.68287 | 0.08483  | -3.91175 |
| H  | -4.38439 | 1.79863  | -3.20026 |
| H  | -4.13605 | 2.87402  | -0.97226 |
| N  | -0.94936 | 1.83577  | 1.43434  |
| N  | -1.46337 | 0.79615  | -0.85248 |
| Ni | -0.13439 | 0.41052  | 0.46111  |
| C  | 1.63349  | 0.0152   | 1.78963  |



|   |         |          |          |
|---|---------|----------|----------|
| H | 2.27435 | 0.84994  | 1.49639  |
| C | 1.2083  | -0.94134 | 0.74956  |
| H | 1.78433 | -0.3319  | 2.68677  |
| H | 1.04247 | -1.86397 | 1.01291  |
| C | 1.89387 | -0.84922 | -0.62634 |
| C | 1.76105 | -1.99599 | -1.58584 |
| H | 2.85325 | -0.30568 | -0.56929 |
| H | 1.17447 | -2.88181 | -1.28537 |
| H | 2.62542 | -2.2722  | -2.21482 |
| O | 1.04532 | -0.70447 | -1.85607 |

UM06/6-311+g(d,p)-SMD-water//UB3LYP/6-31G(d)-gas  
HF=-2234.5071373  
A''-3

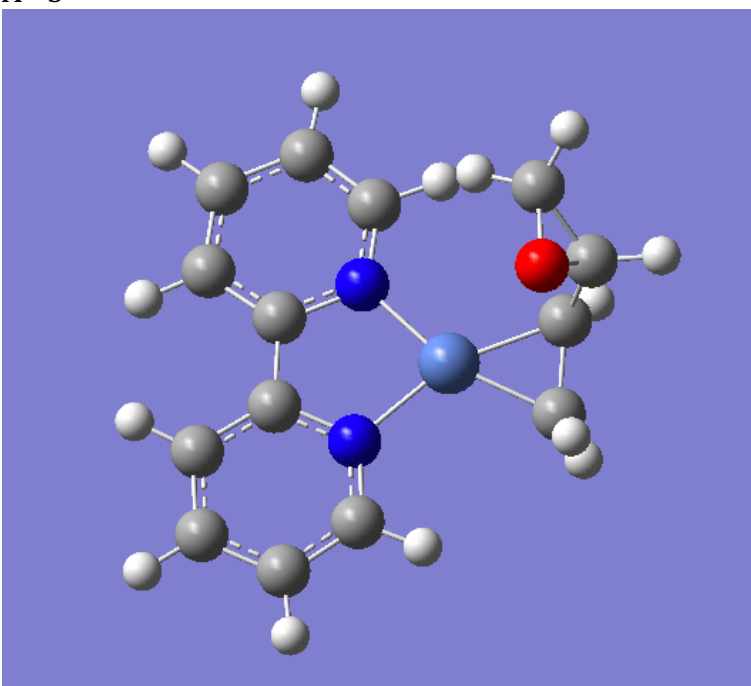

UB3LYP/6-31g(d)-gas  
Zero-point correction= 0.252625 (Hartree/Particle)  
Thermal correction to Energy= 0.268347  
Thermal correction to Enthalpy= 0.269292  
Thermal correction to Gibbs Free Energy= 0.207703  
Sum of electronic and zero-point Energies= -2234.520895  
Sum of electronic and thermal Energies= -2234.505172  
Sum of electronic and thermal Enthalpies= -2234.504228  
Sum of electronic and thermal Free Energies= -2234.565817

|   |          |         |         |
|---|----------|---------|---------|
| C | -2.09139 | 2.31433 | 0.86226 |
| C | -0.60045 | 2.29548 | 2.65039 |
| C | -1.34907 | 3.2387  | 3.34487 |
| C | -2.51948 | 3.72874 | 2.76326 |
| C | -2.89366 | 3.25707 | 1.50751 |

|    |          |          |          |
|----|----------|----------|----------|
| C  | -2.36718 | 1.74219  | -0.47025 |
| C  | -1.59    | 0.23902  | -2.07149 |
| C  | -2.62395 | 0.56782  | -2.94186 |
| C  | -3.56447 | 1.51936  | -2.54539 |
| C  | -3.42795 | 2.11877  | -1.29569 |
| H  | 0.30859  | 1.87258  | 3.06297  |
| H  | -1.01858 | 3.57672  | 4.32156  |
| H  | -3.13207 | 4.46249  | 3.27829  |
| H  | -3.80343 | 3.61582  | 1.03871  |
| H  | -0.81183 | -0.46833 | -2.33986 |
| H  | -2.68287 | 0.08483  | -3.91175 |
| H  | -4.38439 | 1.79863  | -3.20026 |
| H  | -4.13605 | 2.87402  | -0.97226 |
| N  | -0.94936 | 1.83577  | 1.43434  |
| N  | -1.46337 | 0.79615  | -0.85248 |
| Ni | -0.13439 | 0.41052  | 0.46111  |
| C  | 0.78045  | -1.52969 | 1.41108  |
| H  | 1.08875  | -1.05642 | 2.3462   |
| C  | 1.14113  | -0.87211 | 0.14025  |
| H  | 0.75599  | -2.503   | 1.42394  |
| H  | 1.28424  | -1.43213 | -0.64332 |
| C  | 2.13993  | 0.29844  | 0.20206  |
| C  | 2.80085  | 0.76113  | -1.06382 |
| H  | 2.72334  | 0.28874  | 1.13942  |
| H  | 2.55716  | 0.25274  | -2.01314 |
| H  | 3.85671  | 1.08231  | -1.03143 |
| O  | 1.75761  | 1.61663  | -0.40574 |

UM06/6-311+g(d,p)-SMD-water//UB3LYP/6-31G(d)-gas  
HF=-2234.5054061  
A-TS



UB3LYP/6-31g(d)-gas

Imaginary frequency = -329.39 cm<sup>-1</sup>

Zero-point correction= 0.251353 (Hartree/Particle)

Thermal correction to Energy= 0.266957

Thermal correction to Enthalpy= 0.267901

Thermal correction to Gibbs Free Energy= 0.207241

Sum of electronic and zero-point Energies= -2234.525252

Sum of electronic and thermal Energies= -2234.509648

Sum of electronic and thermal Enthalpies= -2234.508704

Sum of electronic and thermal Free Energies= -2234.569364

|   |          |         |          |
|---|----------|---------|----------|
| C | -2.21805 | 2.2067  | 1.01322  |
| C | -0.8602  | 2.24573 | 2.90975  |
| C | -1.85308 | 2.85778 | 3.66243  |
| C | -3.08162 | 3.13915 | 3.06051  |
| C | -3.26027 | 2.80848 | 1.72103  |
| C | -2.26557 | 1.84905 | -0.4142  |
| C | -1.02128 | 0.94125 | -2.16952 |
| C | -2.06512 | 1.16928 | -3.06505 |
| C | -3.2467  | 1.7485  | -2.60533 |
| C | -3.34417 | 2.10529 | -1.26234 |
| H | 0.10485  | 2.00186 | 3.33588  |
| H | -1.66162 | 3.10734 | 4.70086  |
| H | -3.88259 | 3.61019 | 3.62197  |
| H | -4.20318 | 3.01742 | 1.2281   |
| H | -0.03147 | 0.56791 | -2.4532  |
| H | -1.93935 | 0.90042 | -4.1089  |
| H | -4.07648 | 1.9356  | -3.28106 |
| H | -4.2424  | 2.58264 | -0.88617 |
| N | -1.02411 | 1.91274 | 1.61144  |
| N | -1.12845 | 1.24983 | -0.86255 |

|    |         |          |          |
|----|---------|----------|----------|
| Ni | 0.12817 | 0.87645  | 0.57706  |
| C  | 1.17951 | -0.03141 | 1.83021  |
| H  | 2.04927 | 0.49458  | 2.23892  |
| C  | 1.36142 | -0.67741 | 0.53589  |
| H  | 0.659   | -0.60703 | 2.5993   |
| H  | 0.86863 | -1.61779 | 0.2884   |
| C  | 2.28411 | -0.14783 | -0.37521 |
| C  | 2.61845 | -0.66706 | -1.7188  |
| H  | 2.77675 | 0.79031  | -0.12996 |
| H  | 3.04322 | 0.11678  | -2.38177 |
| H  | 1.76236 | -1.1248  | -2.25478 |
| O  | 3.35321 | -1.31789 | -0.75022 |

UM06/6-311+g(d,p)-SMD-water//UB3LYP/6-31G(d)-gas  
HF=-2234.5046845  
UB3LYP-D3/6-311+g(d,p)-SMD-water//UB3LYP/6-31G(d)-gas  
HF=-2235.1763672  
DLPNO-CCSD(T)/def2-TZVPP//uB3LYP/6-31G(d)-gas  
HF = -2272.466173902212  
 $\Delta G_{\text{solv}} = -0.014615$

A-TS-2

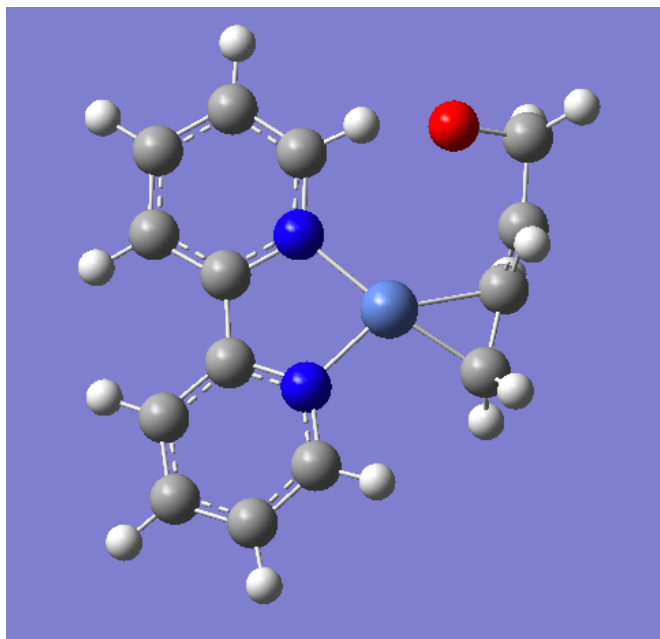

UB3LYP/6-31g(d)-gas  
Zero-point correction= 0.251545 (Hartree/Particle)  
Thermal correction to Energy= 0.266822  
Thermal correction to Enthalpy= 0.267766  
Thermal correction to Gibbs Free Energy= 0.208363  
Sum of electronic and zero-point Energies= -2234.503715  
Sum of electronic and thermal Energies= -2234.488437  
Sum of electronic and thermal Enthalpies= -2234.487493

Sum of electronic and thermal Free Energies= -2234.546896

|    |          |          |          |
|----|----------|----------|----------|
| C  | -2.09139 | 2.31433  | 0.86226  |
| C  | -0.60045 | 2.29548  | 2.65039  |
| C  | -1.34907 | 3.2387   | 3.34487  |
| C  | -2.51948 | 3.72874  | 2.76326  |
| C  | -2.89366 | 3.25707  | 1.50751  |
| C  | -2.36718 | 1.74219  | -0.47025 |
| C  | -1.59    | 0.23902  | -2.07149 |
| C  | -2.62395 | 0.56782  | -2.94186 |
| C  | -3.56447 | 1.51936  | -2.54539 |
| C  | -3.42795 | 2.11877  | -1.29569 |
| H  | 0.30859  | 1.87258  | 3.06297  |
| H  | -1.01858 | 3.57672  | 4.32156  |
| H  | -3.13207 | 4.46249  | 3.27829  |
| H  | -3.80343 | 3.61582  | 1.03871  |
| H  | -0.81183 | -0.46833 | -2.33986 |
| H  | -2.68287 | 0.08483  | -3.91175 |
| H  | -4.38439 | 1.79863  | -3.20026 |
| H  | -4.13605 | 2.87402  | -0.97226 |
| N  | -0.94936 | 1.83577  | 1.43434  |
| N  | -1.46337 | 0.79615  | -0.85248 |
| Ni | -0.13439 | 0.41052  | 0.46111  |
| C  | 0.78045  | -1.52969 | 1.41108  |
| H  | 1.08875  | -1.05642 | 2.3462   |
| C  | 1.14113  | -0.87211 | 0.14025  |
| H  | 0.75599  | -2.503   | 1.42394  |
| H  | 1.28424  | -1.43213 | -0.64332 |
| C  | 2.13993  | 0.29844  | 0.20206  |
| C  | 2.80085  | 0.76113  | -1.06382 |
| H  | 2.72334  | 0.28874  | 1.13942  |
| H  | 2.55716  | 0.25274  | -2.01314 |
| H  | 3.85671  | 1.08231  | -1.03143 |
| O  | 1.8792   | 1.92152  | -0.82433 |

UM06/6-311+g(d,p)-SMD-water//UB3LYP/6-31G(d)-gas

HF=-2234.4937113

A-TS-3

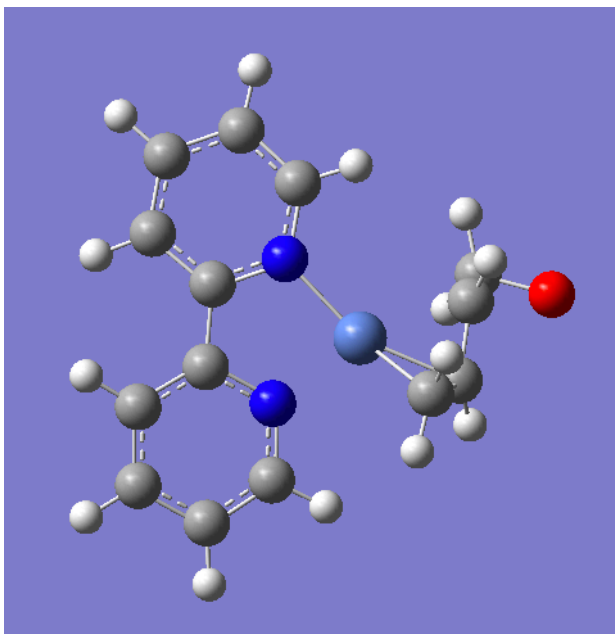

UB3LYP/6-31g(d)-gas

Zero-point correction= 0.249598 (Hartree/Particle)

Thermal correction to Energy= 0.265678

Thermal correction to Enthalpy= 0.266622

Thermal correction to Gibbs Free Energy= 0.204586

Sum of electronic and zero-point Energies= -2234.471490

Sum of electronic and thermal Energies= -2234.455410

Sum of electronic and thermal Enthalpies= -2234.454465

Sum of electronic and thermal Free Energies= -2234.516502

|   |          |         |          |
|---|----------|---------|----------|
| C | -1.70758 | 0.53731 | 0.64911  |
| C | -0.84761 | 0.48359 | 2.81071  |
| C | -2.11746 | 0.53539 | 3.36693  |
| C | -3.22804 | 0.55884 | 2.51601  |
| C | -3.01465 | 0.56224 | 1.14203  |
| C | -1.33768 | 0.61935 | -0.76877 |
| C | 0.45861  | 0.52724 | -2.24403 |
| C | -0.34017 | 0.93312 | -3.30687 |
| C | -1.69949 | 1.16407 | -3.08343 |
| C | -2.20072 | 1.01173 | -1.79466 |
| H | 0.04099  | 0.45429 | 3.43095  |
| H | -2.2315  | 0.55472 | 4.44573  |
| H | -4.23678 | 0.57781 | 2.9166   |
| H | -3.8542  | 0.57573 | 0.45531  |
| H | 1.50788  | 0.29799 | -2.38243 |
| H | 0.10079  | 1.05222 | -4.29077 |
| H | -2.35245 | 1.47428 | -3.8936  |
| H | -3.2422  | 1.224   | -1.57912 |
| N | -0.62699 | 0.47541 | 1.47793  |
| N | -0.0213  | 0.34151 | -0.99906 |

|    |         |          |          |
|----|---------|----------|----------|
| Ni | 0.95294 | -0.13612 | 0.60825  |
| C  | 2.13498 | -0.75667 | 1.97415  |
| H  | 2.85458 | 0.02954  | 2.22291  |
| C  | 2.35455 | -1.50454 | 0.77786  |
| H  | 1.75413 | -1.28207 | 2.84949  |
| H  | 1.99573 | -2.53165 | 0.70416  |
| C  | 2.78483 | -0.84517 | -0.40012 |
| C  | 3.08045 | -1.62243 | -1.65886 |
| H  | 3.35209 | 0.08208  | -0.29852 |
| H  | 2.96316 | -1.02099 | -2.59654 |
| H  | 2.37801 | -2.48789 | -1.76087 |
| O  | 4.34509 | -1.88493 | -1.29048 |

UM06/6-311+g(d,p)-SMD-water//UB3LYP/6-31G(d)-gas  
HF=-2234.4608059  
B''

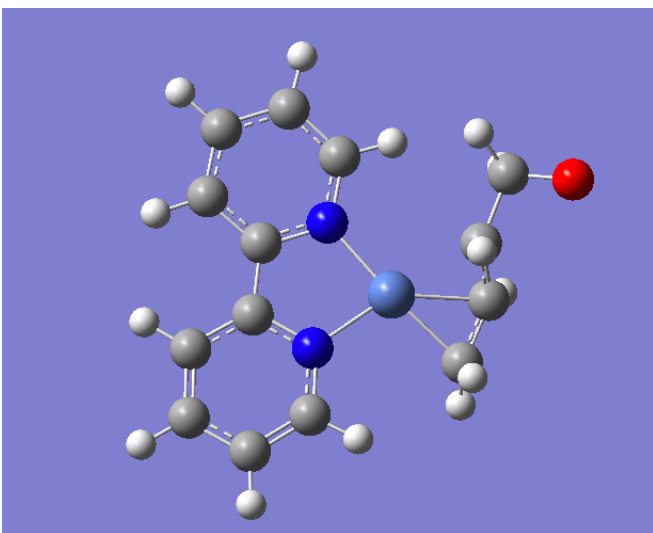

|                                              |                             |
|----------------------------------------------|-----------------------------|
| UB3LYP/6-31g(d)-gas                          |                             |
| Zero-point correction=                       | 0.251237 (Hartree/Particle) |
| Thermal correction to Energy=                | 0.267198                    |
| Thermal correction to Enthalpy=              | 0.268142                    |
| Thermal correction to Gibbs Free Energy=     | 0.207218                    |
| Sum of electronic and zero-point Energies=   | -2234.499830                |
| Sum of electronic and thermal Energies=      | -2234.483869                |
| Sum of electronic and thermal Enthalpies=    | -2234.482924                |
| Sum of electronic and thermal Free Energies= | -2234.543848                |
| C                                            | -2.09139 2.31433 0.86226    |
| C                                            | -0.60045 2.29548 2.65039    |
| C                                            | -1.34907 3.2387 3.34487     |
| C                                            | -2.51948 3.72874 2.76326    |
| C                                            | -2.89366 3.25707 1.50751    |
| C                                            | -2.36718 1.74219 -0.47025   |

|    |          |          |          |
|----|----------|----------|----------|
| C  | -1.59    | 0.23902  | -2.07149 |
| C  | -2.62395 | 0.56782  | -2.94186 |
| C  | -3.56447 | 1.51936  | -2.54539 |
| C  | -3.42795 | 2.11877  | -1.29569 |
| H  | 0.30859  | 1.87258  | 3.06297  |
| H  | -1.01858 | 3.57672  | 4.32156  |
| H  | -3.13207 | 4.46249  | 3.27829  |
| H  | -3.80343 | 3.61582  | 1.03871  |
| H  | -0.81183 | -0.46833 | -2.33986 |
| H  | -2.68287 | 0.08483  | -3.91175 |
| H  | -4.38439 | 1.79863  | -3.20026 |
| H  | -4.13605 | 2.87402  | -0.97226 |
| N  | -0.94936 | 1.83577  | 1.43434  |
| N  | -1.46337 | 0.79615  | -0.85248 |
| Ni | -0.13439 | 0.41052  | 0.46111  |
| C  | 0.64814  | -1.55952 | 1.45703  |
| H  | 1.1168   | -1.12328 | 2.34221  |
| C  | 0.81569  | -0.87001 | 0.16319  |
| H  | 0.59959  | -2.53195 | 1.44665  |
| H  | 0.81451  | -1.40784 | -0.64849 |
| C  | 1.84279  | 0.27536  | 0.09394  |
| C  | 2.30199  | 0.76325  | -1.24936 |
| H  | 2.57003  | 0.22277  | 0.92308  |
| H  | 2.83311  | 1.72887  | -1.31668 |
| H  | 1.66266  | 0.58597  | -2.13189 |
| O  | 3.57617  | -0.13594 | -1.81814 |

UM06/6-311+g(d,p)-SMD-water//UB3LYP/6-31G(d)-gas  
HF=-2234.5213308  
UB3LYP-D3/6-311+g(d,p)-SMD-water//UB3LYP/6-31G(d)-gas  
HF = - 2235.1929384  
DLPNO-CCSD(T)/def2-TZVPP//uB3LYP/6-31G(d)-gas  
HF = -2232.8431

$\Delta G_{\text{solv}} = -0.0624885$

B''-2



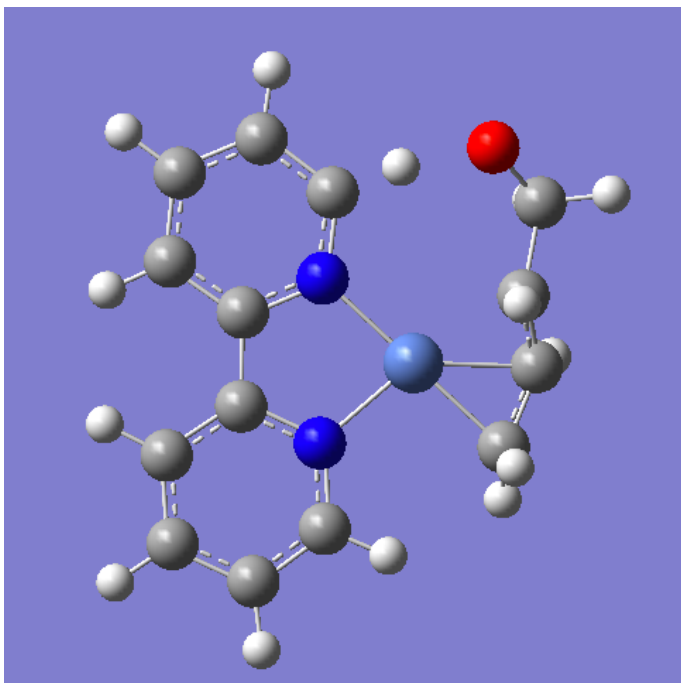

UB3LYP/6-31g(d)-gas

Zero-point correction= 0.250237 (Hartree/Particle)

Thermal correction to Energy= 0.265860

Thermal correction to Enthalpy= 0.266804

Thermal correction to Gibbs Free Energy= 0.206730

Sum of electronic and zero-point Energies= -2234.512482

Sum of electronic and thermal Energies= -2234.496860

Sum of electronic and thermal Enthalpies= -2234.495916

Sum of electronic and thermal Free Energies= -2234.555990

|   |          |         |          |
|---|----------|---------|----------|
| C | -2.19805 | 2.1767  | 1.00322  |
| C | -0.8402  | 2.20573 | 2.89975  |
| C | -1.82308 | 2.84778 | 3.65243  |
| C | -3.05162 | 3.13915 | 3.05051  |
| C | -3.23027 | 2.79848 | 1.71103  |
| C | -2.24557 | 1.83905 | -0.4242  |
| C | -0.98128 | 0.96125 | -2.18952 |
| C | -2.05512 | 1.15928 | -3.07505 |
| C | -3.2367  | 1.7285  | -2.60533 |
| C | -3.33417 | 2.08529 | -1.26234 |
| H | 0.11485  | 1.94186 | 3.33588  |
| H | -1.63162 | 3.09734 | 4.68086  |
| H | -3.84259 | 3.62019 | 3.60197  |
| H | -4.16318 | 3.02741 | 1.2081   |
| H | 0.06853  | 0.67791 | -2.4832  |
| H | -1.92935 | 0.90042 | -4.1189  |
| H | -4.06648 | 1.9156  | -3.28106 |
| H | -4.2324  | 2.55264 | -0.88617 |

|    |          |          |          |
|----|----------|----------|----------|
| N  | -1.01411 | 1.85274  | 1.61144  |
| N  | -1.09845 | 1.26983  | -0.89255 |
| Ni | 0.19817  | 0.87645  | 0.53706  |
| C  | 1.06951  | -0.05141 | 1.97021  |
| H  | 1.89927  | 0.48458  | 2.42892  |
| C  | 1.43142  | -0.82741 | 0.77589  |
| H  | 0.419    | -0.52703 | 2.7293   |
| H  | 0.87863  | -1.72779 | 0.4984   |
| C  | 2.12411  | -0.12783 | -0.17521 |
| C  | 2.20685  | -0.29607 | -1.69764 |
| H  | 2.60778  | 0.85623  | 0.09518  |
| H  | 1.69586  | -1.29131 | -1.91093 |
| H  | 3.30641  | -0.57579 | -1.88126 |
| O  | 1.73628  | 0.78243  | -2.49592 |

UM06/6-311+g(d,p)-SMD-water//UB3LYP/6-31G(d)-gas  
HF=-2234.5211117

B''-3

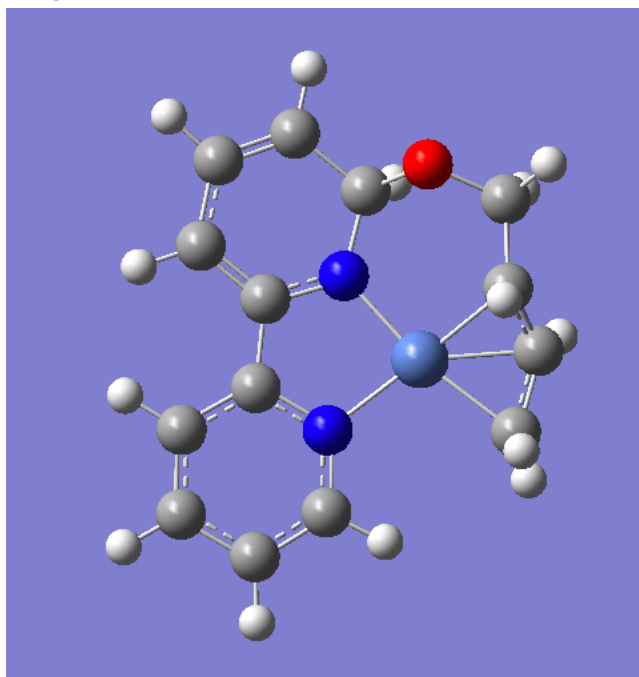

UB3LYP/6-31g(d)-gas

|                                              |                             |
|----------------------------------------------|-----------------------------|
| Zero-point correction=                       | 0.255193 (Hartree/Particle) |
| Thermal correction to Energy=                | 0.269634                    |
| Thermal correction to Enthalpy=              | 0.270578                    |
| Thermal correction to Gibbs Free Energy=     | 0.214080                    |
| Sum of electronic and zero-point Energies=   | -2234.545905                |
| Sum of electronic and thermal Energies=      | -2234.531465                |
| Sum of electronic and thermal Enthalpies=    | -2234.530521                |
| Sum of electronic and thermal Free Energies= | -2234.587018                |

|   |          |         |         |
|---|----------|---------|---------|
| C | -2.09139 | 2.31433 | 0.86226 |
|---|----------|---------|---------|

|    |          |          |          |
|----|----------|----------|----------|
| C  | -0.60045 | 2.29548  | 2.65039  |
| C  | -1.34907 | 3.2387   | 3.34487  |
| C  | -2.51948 | 3.72874  | 2.76326  |
| C  | -2.89366 | 3.25707  | 1.50751  |
| C  | -2.36718 | 1.74219  | -0.47025 |
| C  | -1.59    | 0.23902  | -2.07149 |
| C  | -2.62395 | 0.56782  | -2.94186 |
| C  | -3.56447 | 1.51936  | -2.54539 |
| C  | -3.42795 | 2.11877  | -1.29569 |
| H  | 0.30859  | 1.87258  | 3.06297  |
| H  | -1.01858 | 3.57672  | 4.32156  |
| H  | -3.13207 | 4.46249  | 3.27829  |
| H  | -3.80343 | 3.61582  | 1.03871  |
| H  | -0.81183 | -0.46833 | -2.33986 |
| H  | -2.68287 | 0.08483  | -3.91175 |
| H  | -4.38439 | 1.79863  | -3.20026 |
| H  | -4.13605 | 2.87402  | -0.97226 |
| N  | -0.94936 | 1.83577  | 1.43434  |
| N  | -1.46337 | 0.79615  | -0.85248 |
| Ni | -0.13439 | 0.41052  | 0.46111  |
| C  | 0.98632  | -1.70189 | 1.42354  |
| H  | 1.19999  | -1.04378 | 2.26895  |
| C  | 1.16611  | -1.17072 | 0.0586   |
| H  | 1.17954  | -2.64502 | 1.56932  |
| H  | 1.41476  | -1.79257 | -0.6482  |
| C  | 1.8801   | 0.18567  | -0.08983 |
| C  | 2.39603  | 0.59475  | -1.43883 |
| H  | 2.46953  | 0.43772  | 0.80914  |
| H  | 1.80659  | 0.3427   | -2.33776 |
| H  | 3.4815   | 0.54721  | -1.63517 |
| O  | 2.28723  | 2.2367   | -1.65742 |

UM06/6-311+g(d,p)-SMD-water//UB3LYP/6-31G(d)-gas  
HF=-2234.5247592

B''-4

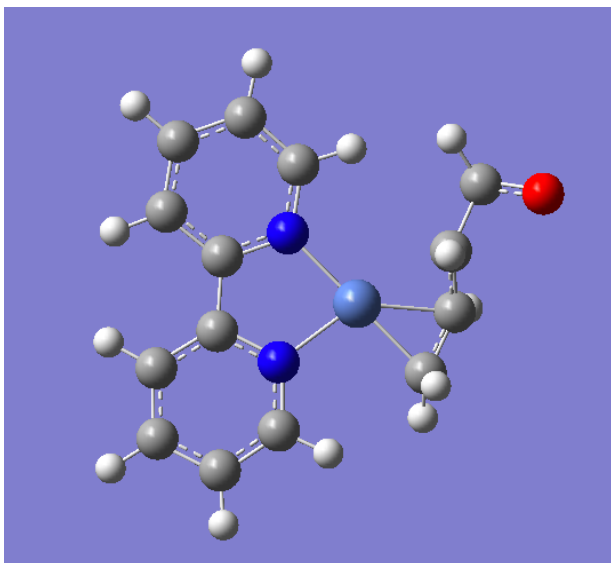

UB3LYP/6-31g(d)-gas

Zero-point correction= 0.251518 (Hartree/Particle)

Thermal correction to Energy= 0.267524

Thermal correction to Enthalpy= 0.268468

Thermal correction to Gibbs Free Energy= 0.207388

Sum of electronic and zero-point Energies= -2234.493939

Sum of electronic and thermal Energies= -2234.477933

Sum of electronic and thermal Enthalpies= -2234.476989

Sum of electronic and thermal Free Energies= -2234.538070

|    |          |          |          |
|----|----------|----------|----------|
| C  | -2.09139 | 2.31433  | 0.86226  |
| C  | -0.60045 | 2.29548  | 2.65039  |
| C  | -1.34907 | 3.2387   | 3.34487  |
| C  | -2.51948 | 3.72874  | 2.76326  |
| C  | -2.89366 | 3.25707  | 1.50751  |
| C  | -2.36718 | 1.74219  | -0.47025 |
| C  | -1.59    | 0.23902  | -2.07149 |
| C  | -2.62395 | 0.56782  | -2.94186 |
| C  | -3.56447 | 1.51936  | -2.54539 |
| C  | -3.42795 | 2.11877  | -1.29569 |
| H  | 0.30859  | 1.87258  | 3.06297  |
| H  | -1.01858 | 3.57672  | 4.32156  |
| H  | -3.13207 | 4.46249  | 3.27829  |
| H  | -3.80343 | 3.61582  | 1.03871  |
| H  | -0.81183 | -0.46833 | -2.33986 |
| H  | -2.68287 | 0.08483  | -3.91175 |
| H  | -4.38439 | 1.79863  | -3.20026 |
| H  | -4.13605 | 2.87402  | -0.97226 |
| N  | -0.94936 | 1.83577  | 1.43434  |
| N  | -1.46337 | 0.79615  | -0.85248 |
| Ni | -0.13439 | 0.41052  | 0.46111  |

|   |         |          |          |
|---|---------|----------|----------|
| C | 0.98245 | -0.427   | 2.10699  |
| H | 1.10574 | 0.65611  | 2.03511  |
| C | 1.19576 | -1.239   | 0.89345  |
| H | 1.23271 | -0.8199  | 2.96203  |
| H | 1.52333 | -2.14965 | 1.00073  |
| C | 1.8208  | -0.54215 | -0.32938 |
| C | 2.37662 | -1.3819  | -1.44258 |
| H | 2.34378 | 0.38821  | -0.0465  |
| H | 2.59367 | -0.90746 | -2.41564 |
| H | 2.01577 | -2.41822 | -1.56453 |
| O | 3.7039  | -1.32877 | -0.44704 |

UM06/6-311+g(d,p)-SMD-water//UB3LYP/6-31G(d)-gas  
HF=-2234.5169599

B''-C-TS

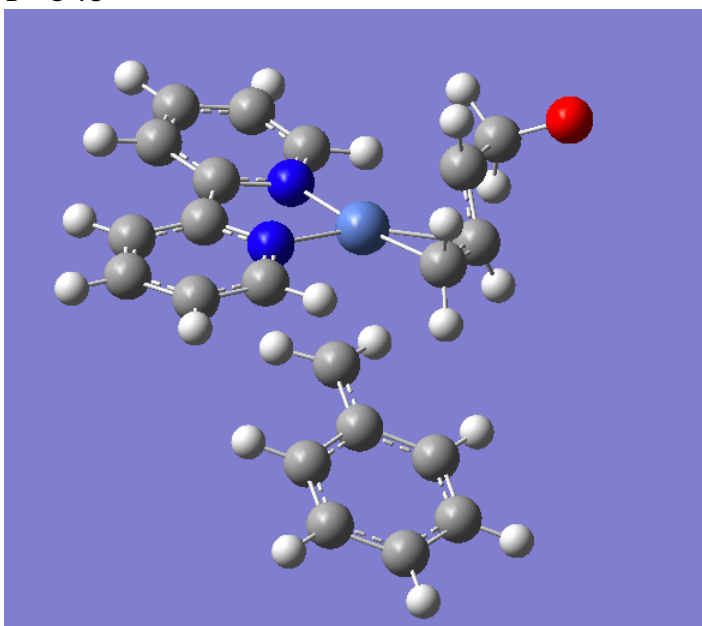

UB3LYP/6-31g(d)-gas

Imaginary frequency = -118.30 cm<sup>-1</sup>

Zero-point correction= 0.366489 (Hartree/Particle)

Thermal correction to Energy= 0.389629

Thermal correction to Enthalpy= 0.390573

Thermal correction to Gibbs Free Energy= 0.309400

Sum of electronic and zero-point Energies= -2505.299540

Sum of electronic and thermal Energies= -2505.276400

Sum of electronic and thermal Enthalpies= -2505.275456

Sum of electronic and thermal Free Energies= -2505.356629

|   |          |         |         |
|---|----------|---------|---------|
| C | -1.6496  | 1.2818  | 1.34746 |
| C | 0.6055   | 1.81183 | 1.79102 |
| C | 0.26003  | 2.60437 | 2.89104 |
| C | -1.10348 | 2.7151  | 3.24415 |

|    |          |          |          |
|----|----------|----------|----------|
| C  | -2.05844 | 2.04413  | 2.46607  |
| C  | -2.5476  | 0.57738  | 0.44555  |
| C  | -2.6721  | -0.94304 | -1.35147 |
| C  | -4.07159 | -0.88506 | -1.37573 |
| C  | -4.72984 | -0.05014 | -0.44806 |
| C  | -3.95693 | 0.68734  | 0.46427  |
| H  | 1.64164  | 1.68806  | 1.49557  |
| H  | 1.03494  | 3.11664  | 3.45248  |
| H  | -1.4086  | 3.30577  | 4.10355  |
| H  | -3.11074 | 2.10083  | 2.72524  |
| H  | -2.13205 | -1.57032 | -2.04963 |
| H  | -4.62223 | -1.47773 | -2.09914 |
| H  | -5.81371 | 0.02789  | -0.44136 |
| H  | -4.43693 | 1.3528   | 1.17458  |
| N  | -0.31562 | 1.15801  | 1.01642  |
| N  | -1.90476 | -0.2391  | -0.46238 |
| Ni | 0.01751  | -0.13324 | -0.34789 |
| C  | 1.56911  | -3.00405 | 1.49008  |
| C  | 2.95027  | -3.02211 | 1.61029  |
| C  | 3.61524  | -2.01623 | 2.32751  |
| C  | 2.87324  | -0.98619 | 2.92492  |
| C  | 1.49182  | -0.95578 | 2.80895  |
| C  | 0.79031  | -1.96584 | 2.08432  |
| H  | 1.05923  | -3.78806 | 0.93559  |
| H  | 3.52074  | -3.82184 | 1.14543  |
| H  | 4.69728  | -2.03556 | 2.41998  |
| H  | 3.38443  | -0.20695 | 3.48482  |
| H  | 0.92196  | -0.15344 | 3.27132  |
| C  | -0.61159 | -1.94001 | 1.96292  |
| H  | -1.19995 | -1.14607 | 2.41279  |
| H  | -1.14303 | -2.71192 | 1.41599  |
| C  | 1.9537   | -0.27448 | -0.22614 |
| H  | 2.40663  | 0.58352  | -0.72956 |
| H  | 2.41666  | -0.52918 | 0.72549  |
| C  | 1.43789  | -1.33452 | -1.01819 |
| H  | 1.41227  | -2.35578 | -0.63945 |
| C  | 0.64903  | -0.99034 | -2.12941 |
| H  | 0.9012   | -0.06924 | -2.66265 |
| C  | 0.05869  | -2.0586  | -3.03744 |
| H  | -0.83786 | -1.65833 | -3.56619 |
| H  | -0.2854  | -2.91871 | -2.41372 |
| O  | 1.1063   | -2.31999 | -3.85428 |

UM06/6-311+g(d,p)-SMD-water//UB3LYP/6-31G(d)-gas  
HF=-2505.2944336  
UB3LYP-D3/6-311+g(d,p)-SMD-water//UB3LYP/6-31G(d)-gas  
HF = -2506.2038158

DLPNO-CCSD(T)/def2-TZVPP//uB3LYP/6-31G(d)-gas  
 HF = -2503.253379015522  
 $\Delta G_{\text{solv}} = -0.0613693$

B''-C-TS-2

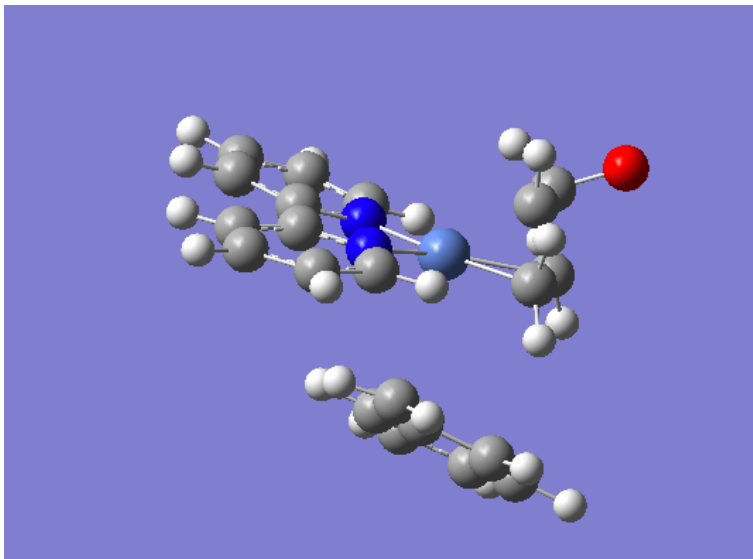

UB3LYP/6-31g(d)-gas

Imaginary frequency =  $-119.99 \text{ cm}^{-1}$

Zero-point correction= 0.366492 (Hartree/Particle)

Thermal correction to Energy= 0.389628

Thermal correction to Enthalpy= 0.390572

Thermal correction to Gibbs Free Energy= 0.310125

Sum of electronic and zero-point Energies= -2505.299133

Sum of electronic and thermal Energies= -2505.275997

Sum of electronic and thermal Enthalpies= -2505.275053

Sum of electronic and thermal Free Energies= -2505.355500

|   |          |          |          |
|---|----------|----------|----------|
| C | -1.44624 | 1.86042  | 0.63873  |
| C | 0.8173   | 2.33916  | 0.94168  |
| C | 0.5457   | 3.19289  | 2.00086  |
| C | -0.78572 | 3.36388  | 2.40403  |
| C | -1.78449 | 2.68709  | 1.71894  |
| C | -2.40812 | 1.11743  | -0.17099 |
| C | -2.65267 | -0.55378 | -1.77917 |
| C | -4.03709 | -0.45944 | -1.73709 |
| C | -4.62249 | 0.4839   | -0.88393 |
| C | -3.7985  | 1.27646  | -0.09736 |
| H | 1.83307  | 2.16395  | 0.60894  |
| H | 1.35962  | 3.70733  | 2.50029  |
| H | -1.03459 | 4.0092   | 3.24103  |
| H | -2.82033 | 2.78615  | 2.02434  |
| H | -2.16324 | -1.26825 | -2.42685 |
| H | -4.63863 | -1.11129 | -2.36118 |

|    |          |          |          |
|----|----------|----------|----------|
| H  | -5.70129 | 0.59732  | -0.83641 |
| H  | -4.22603 | 2.02352  | 0.56242  |
| N  | -0.14257 | 1.68519  | 0.25759  |
| N  | -1.83813 | 0.20979  | -1.02441 |
| Ni | 0.09928  | 0.34106  | -1.10366 |
| C  | -1.66571 | -2.70433 | -0.67998 |
| C  | -2.00321 | -3.60505 | -1.68006 |
| C  | -1.03111 | -4.4472  | -2.23711 |
| C  | 0.29008  | -4.37403 | -1.774   |
| C  | 0.63764  | -3.47563 | -0.77573 |
| C  | -0.33027 | -2.6074  | -0.19365 |
| H  | -2.42917 | -2.06205 | -0.2474  |
| H  | -3.0309  | -3.65882 | -2.03011 |
| H  | -1.29994 | -5.15248 | -3.01831 |
| H  | 1.04836  | -5.02853 | -2.19708 |
| H  | 1.66404  | -3.42646 | -0.41997 |
| C  | 0.02409  | -1.67941 | 0.8147   |
| H  | 1.00397  | -1.72295 | 1.27704  |
| H  | -0.74041 | -1.1094  | 1.33185  |
| C  | 2.03296  | 0.4255   | -1.39951 |
| H  | 2.25682  | 1.38619  | -1.86878 |
| H  | 2.72273  | 0.13988  | -0.6082  |
| C  | 1.47293  | -0.60596 | -2.19659 |
| H  | 1.64074  | -1.65346 | -1.95078 |
| C  | 0.43711  | -0.27739 | -3.08412 |
| H  | 0.44685  | 0.72016  | -3.53089 |
| C  | -0.20712 | -1.32727 | -3.97791 |
| H  | -1.23152 | -0.99581 | -4.27446 |
| H  | -0.33483 | -2.27646 | -3.3952  |
| O  | 0.68155  | -1.37695 | -4.99063 |

UM06/6-311+g(d,p)-SMD-water//UB3LYP/6-31G(d)-gas  
HF=-2505.2932845  
B''-C-TS-3



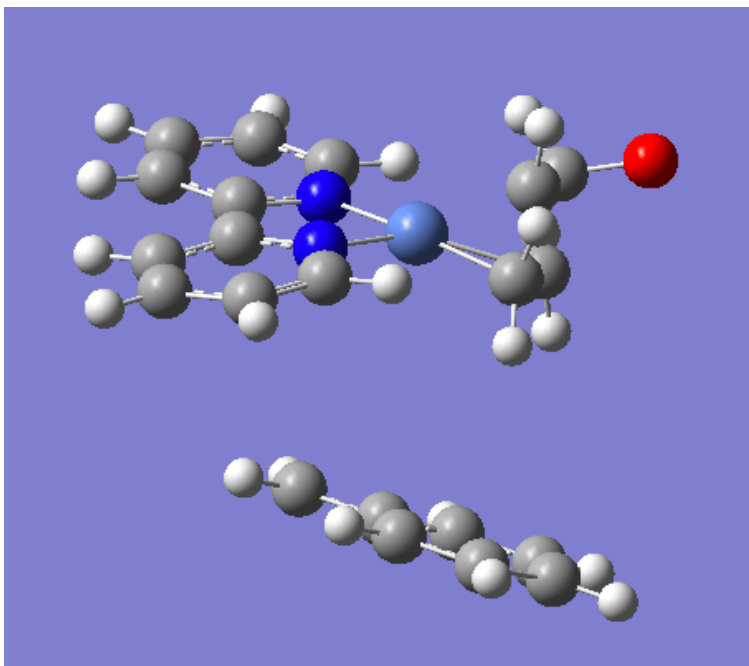

UB3LYP/6-31g(d)-gas

Imaginary frequency =  $-11.19 \text{ cm}^{-1}$

Zero-point correction= 0.366544 (Hartree/Particle)

Thermal correction to Energy= 0.389767

Thermal correction to Enthalpy= 0.390711

Thermal correction to Gibbs Free Energy= 0.308380

Sum of electronic and zero-point Energies= -2505.301722

Sum of electronic and thermal Energies= -2505.278499

Sum of electronic and thermal Enthalpies= -2505.277555

Sum of electronic and thermal Free Energies= -2505.359886

|   |          |          |          |
|---|----------|----------|----------|
| C | -1.26757 | 2.01823  | 0.79284  |
| C | 1.01895  | 2.46656  | 0.98459  |
| C | 0.83673  | 3.14794  | 2.17523  |
| C | -0.46025 | 3.24265  | 2.70926  |
| C | -1.51114 | 2.67087  | 2.0114   |
| C | -2.28891 | 1.41862  | -0.04811 |
| C | -2.67133 | 0.09481  | -1.93252 |
| C | -4.04594 | 0.18593  | -1.77892 |
| C | -4.55844 | 0.9344   | -0.7088  |
| C | -3.67065 | 1.55552  | 0.15455  |
| H | 2.0039   | 2.3592   | 0.54739  |
| H | 1.68911  | 3.59489  | 2.67564  |
| H | -0.63756 | 3.75209  | 3.65152  |
| H | -2.51951 | 2.71747  | 2.40818  |
| H | -2.24165 | -0.46936 | -2.74827 |
| H | -4.6984  | -0.3199  | -2.48229 |
| H | -5.6296  | 1.03383  | -0.56137 |
| H | -4.03916 | 2.15917  | 0.97676  |

|    |          |          |          |
|----|----------|----------|----------|
| N  | 0.00582  | 1.9066   | 0.2869   |
| N  | -1.78973 | 0.68009  | -1.0947  |
| Ni | 0.13368  | 0.72433  | -1.20296 |
| C  | 1.25858  | -3.15714 | 1.08437  |
| C  | 2.5524   | -3.52946 | 0.75359  |
| C  | 3.64925  | -2.81711 | 1.26093  |
| C  | 3.43047  | -1.72058 | 2.10819  |
| C  | 2.14094  | -1.33732 | 2.44404  |
| C  | 1.00714  | -2.04372 | 1.94145  |
| H  | 0.41268  | -3.7145  | 0.68954  |
| H  | 2.7169   | -4.37951 | 0.09671  |
| H  | 4.66098  | -3.11229 | 0.99862  |
| H  | 4.27793  | -1.16803 | 2.50618  |
| H  | 1.97683  | -0.48546 | 3.09965  |
| C  | -0.30423 | -1.66067 | 2.27904  |
| H  | -0.49205 | -0.8132  | 2.93023  |
| H  | -1.16341 | -2.2042  | 1.89973  |
| C  | 2.06554  | 0.52607  | -1.32097 |
| H  | 2.48409  | 1.40408  | -1.81946 |
| H  | 2.62799  | 0.19604  | -0.44962 |
| C  | 1.42652  | -0.4656  | -2.11057 |
| H  | 1.41139  | -1.50828 | -1.79477 |
| C  | 0.52783  | -0.02996 | -3.09843 |
| H  | 0.7478   | 0.91655  | -3.60025 |
| C  | -0.19473 | -1.02482 | -3.99411 |
| H  | -1.13166 | -0.57127 | -4.39414 |
| H  | -0.49356 | -1.91271 | -3.38685 |
| O  | 0.74601  | -1.26087 | -4.93946 |

UM06/6-311+g(d,p)-SMD-water//UB3LYP/6-31G(d)-gas  
HF=-2505.287344  
B''-C-TS-4

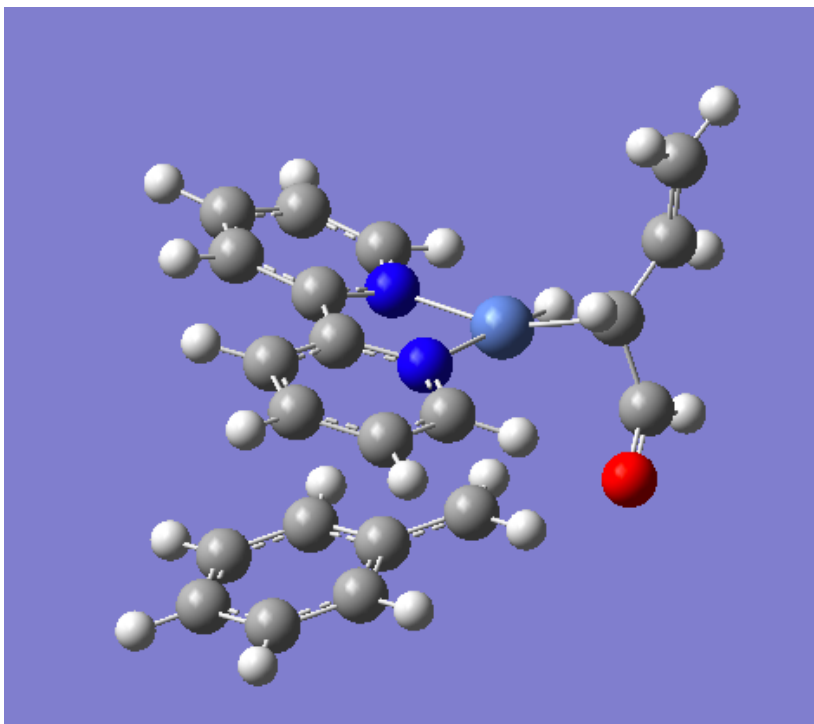

UB3LYP/6-31g(d)-gas

Imaginary frequency =  $-44.03 \text{ cm}^{-1}$

Zero-point correction= 0.364680 (Hartree/Particle)

Thermal correction to Energy= 0.388061

Thermal correction to Enthalpy= 0.389005

Thermal correction to Gibbs Free Energy= 0.308596

Sum of electronic and zero-point Energies= -2505.342497

Sum of electronic and thermal Energies= -2505.319116

Sum of electronic and thermal Enthalpies= -2505.318172

Sum of electronic and thermal Free Energies= -2505.398581

|   |          |          |          |
|---|----------|----------|----------|
| C | -0.45942 | 1.34416  | 0.81609  |
| C | 1.86771  | 1.37529  | 0.74669  |
| C | 1.93417  | 1.93853  | 2.01829  |
| C | 0.75043  | 2.23067  | 2.69379  |
| C | -0.463   | 1.9162   | 2.08916  |
| C | -1.66099 | 0.90211  | 0.09153  |
| C | -2.40801 | -0.24129 | -1.79563 |
| C | -3.73669 | -0.06332 | -1.42992 |
| C | -4.02719 | 0.63456  | -0.25664 |
| C | -2.9742  | 1.12198  | 0.51098  |
| H | 2.75694  | 1.08633  | 0.1914   |
| H | 2.90323  | 2.13967  | 2.46279  |
| H | 0.76888  | 2.6767   | 3.68378  |
| H | -1.3976  | 2.09725  | 2.608    |
| H | -2.1275  | -0.76857 | -2.69846 |
| H | -4.52452 | -0.46472 | -2.05866 |

|    |          |          |          |
|----|----------|----------|----------|
| H  | -5.05449 | 0.79731  | 0.05478  |
| H  | -3.17073 | 1.67361  | 1.42347  |
| N  | 0.69702  | 1.10703  | 0.14008  |
| N  | -1.38104 | 0.22575  | -1.05832 |
| Ni | 0.43422  | 0.3      | -1.59701 |
| C  | 1.07656  | -1.98021 | 2.20603  |
| C  | 0.52778  | -2.00833 | 3.47961  |
| C  | -0.80415 | -2.40206 | 3.67354  |
| C  | -1.58179 | -2.76968 | 2.5661   |
| C  | -1.04233 | -2.74689 | 1.28834  |
| C  | 0.30891  | -2.35141 | 1.06282  |
| H  | 2.11087  | -1.67966 | 2.06068  |
| H  | 1.13835  | -1.72792 | 4.33465  |
| H  | -1.22818 | -2.42804 | 4.67363  |
| H  | -2.6137  | -3.08153 | 2.70966  |
| H  | -1.64895 | -3.03972 | 0.4345   |
| C  | 0.86959  | -2.33031 | -0.23299 |
| H  | 0.30685  | -2.69663 | -1.08474 |
| H  | 1.9124   | -2.07542 | -0.38847 |
| C  | 1.61385  | 2.5614   | -4.36389 |
| H  | 1.69047  | 3.44427  | -3.73175 |
| H  | 1.40012  | 2.73248  | -5.41507 |
| C  | 1.77338  | 1.32453  | -3.8712  |
| H  | 1.6816   | 0.47617  | -4.55105 |
| C  | 2.06495  | 0.98746  | -2.46525 |
| H  | 2.38848  | 1.85382  | -1.8807  |
| C  | 2.8495   | -0.20267 | -2.18754 |
| H  | 2.78483  | -0.99675 | -2.964   |
| H  | 0.16425  | -0.48356 | -2.81737 |
| O  | 3.52913  | -0.40856 | -1.17169 |

UM06/6-311+g(d,p)-SMD-water//UB3LYP/6-31G(d)-gas  
HF=-2505.293624  
B''-C-TS-5

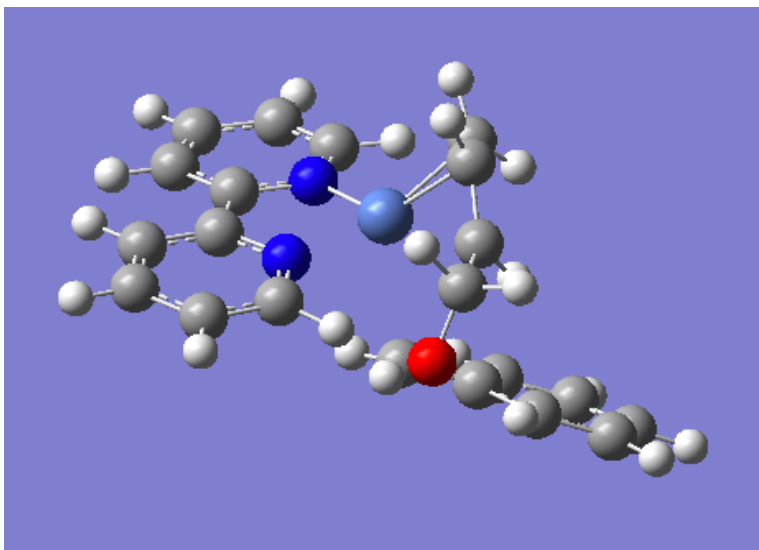

UB3LYP/6-31g(d)-gas

Imaginary frequency = -66.47 cm<sup>-1</sup>

Zero-point correction= 0.368405 (Hartree/Particle)

Thermal correction to Energy= 0.390410

Thermal correction to Enthalpy= 0.391354

Thermal correction to Gibbs Free Energy= 0.315795

Sum of electronic and zero-point Energies= -2505.320022

Sum of electronic and thermal Energies= -2505.298017

Sum of electronic and thermal Enthalpies= -2505.297073

Sum of electronic and thermal Free Energies= -2505.372632

|    |          |          |          |
|----|----------|----------|----------|
| C  | -1.4862  | -0.45321 | 2.43597  |
| C  | 0.70832  | 0.16019  | 2.93673  |
| C  | 0.34974  | 0.60516  | 4.20105  |
| C  | -0.98642 | 0.49914  | 4.59535  |
| C  | -1.90884 | -0.03006 | 3.70141  |
| C  | -2.38139 | -0.97491 | 1.39137  |
| C  | -2.49679 | -1.64944 | -0.8469  |
| C  | -3.87728 | -1.8347  | -0.73878 |
| C  | -4.51567 | -1.58956 | 0.47415  |
| C  | -3.75883 | -1.141   | 1.55384  |
| H  | 1.73235  | 0.22042  | 2.58889  |
| H  | 1.10434  | 1.02212  | 4.8594   |
| H  | -1.30396 | 0.8295   | 5.57963  |
| H  | -2.95299 | -0.10967 | 3.98047  |
| H  | -1.93311 | -1.71442 | -1.81094 |
| H  | -4.43442 | -2.16057 | -1.61143 |
| H  | -5.58788 | -1.72906 | 0.5812   |
| H  | -4.23582 | -0.9229  | 2.50281  |
| N  | -0.17685 | -0.36838 | 2.06743  |
| N  | -1.76342 | -1.25051 | 0.21179  |
| Ni | 0.22683  | -1.04862 | 0.3095   |

|   |          |          |          |
|---|----------|----------|----------|
| C | 1.78677  | 1.45189  | -2.62619 |
| C | 2.99535  | 1.99808  | -3.04369 |
| C | 3.7467   | 2.80706  | -2.18278 |
| C | 3.26794  | 3.0691   | -0.89375 |
| C | 2.06013  | 2.52573  | -0.46985 |
| C | 1.28452  | 1.70178  | -1.32252 |
| H | 1.19774  | 0.82276  | -3.29024 |
| H | 3.35519  | 1.79781  | -4.04998 |
| H | 4.69008  | 3.23311  | -2.51353 |
| H | 3.83903  | 3.70649  | -0.22251 |
| H | 1.68596  | 2.75011  | 0.52748  |
| C | 0.02714  | 1.12923  | -0.90174 |
| H | -0.49207 | 1.66642  | -0.10948 |
| H | -0.60006 | 0.75935  | -1.70531 |
| C | 2.02372  | -1.74841 | 0.73849  |
| H | 2.77769  | -1.0371  | 0.39995  |
| H | 2.18011  | -2.12454 | 1.749    |
| C | 1.39561  | -2.59391 | -0.21948 |
| H | 0.96976  | -3.55478 | 0.07171  |
| C | 1.02346  | -1.99299 | -1.42574 |
| H | 1.64351  | -1.17878 | -1.78526 |
| C | 0.08686  | -2.5457  | -2.47825 |
| H | -0.49648 | -3.38316 | -1.99975 |
| H | 0.72291  | -3.06249 | -3.24172 |
| O | -0.6701  | -1.53481 | -2.97441 |

UM06/6-311+g(d,p)-SMD-water//UB3LYP/6-31G(d)-gas  
HF=-2505.2855863  
B''-C-TS-6

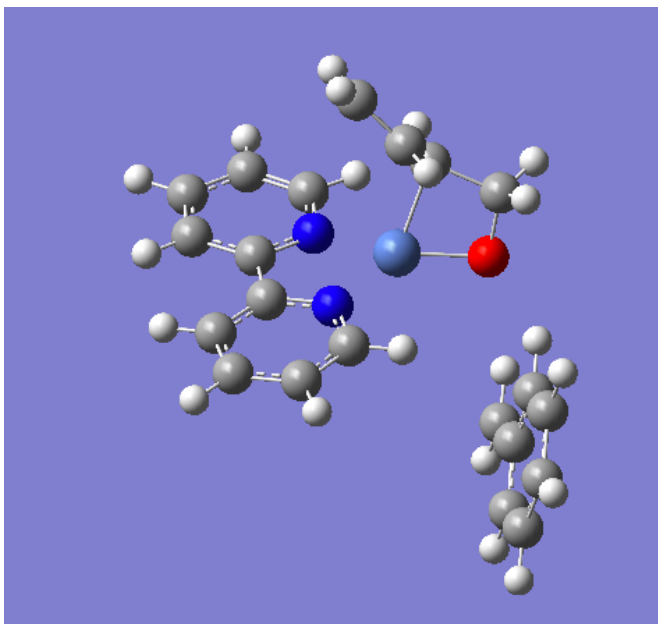

UB3LYP/6-31g(d)-gas

Imaginary frequency = -8.16 cm<sup>-1</sup>

|                                              |                             |
|----------------------------------------------|-----------------------------|
| Zero-point correction=                       | 0.366637 (Hartree/Particle) |
| Thermal correction to Energy=                | 0.390148                    |
| Thermal correction to Enthalpy=              | 0.391092                    |
| Thermal correction to Gibbs Free Energy=     | 0.308252                    |
| Sum of electronic and zero-point Energies=   | -2505.347559                |
| Sum of electronic and thermal Energies=      | -2505.324048                |
| Sum of electronic and thermal Enthalpies=    | -2505.323104                |
| Sum of electronic and thermal Free Energies= | -2505.405945                |

|    |          |          |          |
|----|----------|----------|----------|
| C  | -1.67635 | 2.0636   | 0.56997  |
| C  | 0.43685  | 1.45352  | 1.37487  |
| C  | 0.55397  | 2.62805  | 2.09657  |
| C  | -0.4992  | 3.55737  | 2.05433  |
| C  | -1.61377 | 3.27006  | 1.2804   |
| C  | -2.77781 | 1.66373  | -0.29775 |
| C  | -3.44516 | 0.05064  | -1.8648  |
| C  | -4.6806  | 0.655    | -2.03253 |
| C  | -4.96636 | 1.81497  | -1.29127 |
| C  | -4.01389 | 2.31933  | -0.41851 |
| H  | 1.21894  | 0.70321  | 1.37957  |
| H  | 1.44706  | 2.81346  | 2.68394  |
| H  | -0.43951 | 4.48982  | 2.60727  |
| H  | -2.42862 | 3.98293  | 1.20855  |
| H  | -3.14882 | -0.8503  | -2.39408 |
| H  | -5.40477 | 0.23468  | -2.72231 |
| H  | -5.9275  | 2.31031  | -1.39364 |
| H  | -4.22593 | 3.20362  | 0.17327  |
| N  | -0.65335 | 1.14799  | 0.63767  |
| N  | -2.5151  | 0.54067  | -1.02508 |
| Ni | -0.7738  | -0.30766 | -0.64394 |
| C  | 1.81488  | -3.33037 | 0.53152  |
| C  | 3.15906  | -3.58274 | 0.30453  |
| C  | 4.14146  | -3.01686 | 1.13168  |
| C  | 3.75809  | -2.18731 | 2.19458  |
| C  | 2.4166   | -1.92561 | 2.43209  |
| C  | 1.39961  | -2.49196 | 1.60868  |
| H  | 1.05374  | -3.74485 | -0.1234  |
| H  | 3.45334  | -4.22255 | -0.52347 |
| H  | 5.19294  | -3.21972 | 0.94894  |
| H  | 4.51564  | -1.74962 | 2.83995  |
| H  | 2.1232   | -1.29251 | 3.26669  |
| C  | 0.03359  | -2.22285 | 1.83468  |
| H  | -0.27855 | -1.61622 | 2.6787   |
| H  | -0.72474 | -2.79192 | 1.30951  |
| C  | 2.48446  | 1.52869  | -1.47587 |
| H  | 1.99351  | 2.44012  | -1.81144 |

|   |          |          |          |
|---|----------|----------|----------|
| H | 3.48699  | 1.63442  | -1.07137 |
| C | 1.89387  | 0.31973  | -1.59106 |
| H | 2.45241  | -0.55225 | -1.2409  |
| C | 0.56394  | 0.04066  | -2.10856 |
| H | 0.13409  | 0.85007  | -2.7046  |
| C | 0.23541  | -1.37173 | -2.58108 |
| H | 1.1252   | -2.02339 | -2.5398  |
| H | -0.12884 | -1.39247 | -3.62312 |
| O | -0.76622 | -1.82375 | -1.66941 |

UM06/6-311+g(d,p)-SMD-water//UB3LYP/6-31G(d)-gas  
HF=-2505.2696041

C

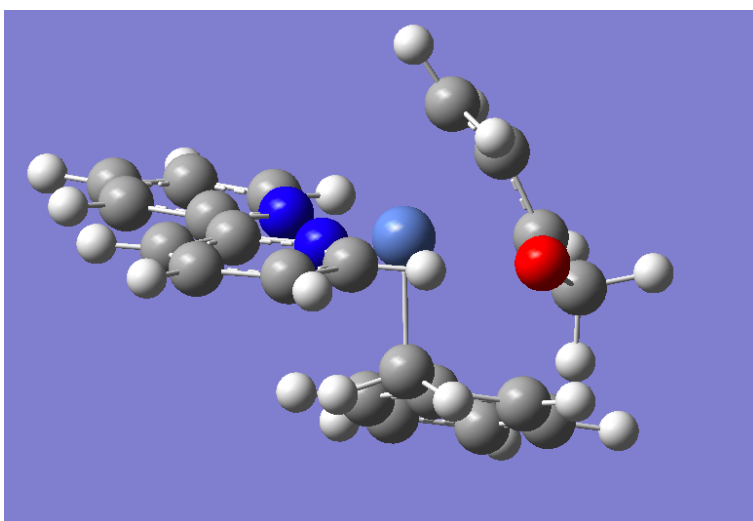

UB3LYP/6-31g(d)-gas

|                                              |                             |
|----------------------------------------------|-----------------------------|
| Zero-point correction=                       | 0.368972 (Hartree/Particle) |
| Thermal correction to Energy=                | 0.391340                    |
| Thermal correction to Enthalpy=              | 0.392284                    |
| Thermal correction to Gibbs Free Energy=     | 0.316297                    |
| Sum of electronic and zero-point Energies=   | -2505.338240                |
| Sum of electronic and thermal Energies=      | -2505.315872                |
| Sum of electronic and thermal Enthalpies=    | -2505.314928                |
| Sum of electronic and thermal Free Energies= | -2505.390915                |

|   |          |          |          |
|---|----------|----------|----------|
| C | -1.52959 | -0.2832  | 2.37299  |
| C | 0.66317  | 0.22089  | 2.98422  |
| C | 0.26326  | 0.6746   | 4.23412  |
| C | -1.09331 | 0.63081  | 4.5604   |
| C | -1.99563 | 0.15047  | 3.61794  |
| C | -2.38927 | -0.76001 | 1.2763   |
| C | -2.42354 | -1.34748 | -0.98999 |
| C | -3.81004 | -1.52569 | -0.93487 |
| C | -4.48983 | -1.33293 | 0.26276  |
| C | -3.76889 | -0.93058 | 1.38643  |



|    |          |          |          |
|----|----------|----------|----------|
| H  | 1.70519  | 0.22769  | 2.68906  |
| H  | 1.00324  | 1.05034  | 4.93263  |
| H  | -1.44332 | 0.97224  | 5.52985  |
| H  | -3.05566 | 0.12324  | 3.8418   |
| H  | -1.82853 | -1.35462 | -1.94374 |
| H  | -4.33707 | -1.81067 | -1.84006 |
| H  | -5.56482 | -1.47727 | 0.32793  |
| H  | -4.27553 | -0.7549  | 2.3289   |
| N  | -0.20238 | -0.25756 | 2.06901  |
| N  | -1.72559 | -0.99121 | 0.10966  |
| Ni | 0.23847  | -0.93697 | 0.33881  |
| C  | 1.67633  | 1.50578  | -2.73846 |
| C  | 2.84579  | 2.028    | -3.27364 |
| C  | 3.62099  | 2.94076  | -2.54419 |
| C  | 3.21083  | 3.33156  | -1.26172 |
| C  | 2.04348  | 2.81837  | -0.71381 |
| C  | 1.24056  | 1.89302  | -1.43653 |
| H  | 1.06449  | 0.78834  | -3.28509 |
| H  | 3.1614   | 1.72688  | -4.26954 |
| H  | 4.53515  | 3.34542  | -2.97039 |
| H  | 3.80754  | 4.04302  | -0.69574 |
| H  | 1.72245  | 3.13122  | 0.27806  |
| C  | 0.03438  | 1.35819  | -0.9123  |
| H  | -0.40418 | 1.79883  | -0.02053 |
| H  | -0.58769 | 0.76477  | -1.57417 |
| C  | 2.01628  | -1.61358 | 0.74633  |
| H  | 2.78574  | -0.88668 | 0.47812  |
| H  | 2.16834  | -2.07883 | 1.72067  |
| C  | 1.43097  | -2.39603 | -0.29719 |
| H  | 1.03997  | -3.39597 | -0.10548 |
| C  | 1.05503  | -1.69432 | -1.44099 |
| H  | 1.63983  | -0.81184 | -1.69559 |
| C  | 0.15883  | -2.14958 | -2.5765  |
| H  | -0.45509 | -3.01103 | -2.18333 |
| H  | 0.81979  | -2.6249  | -3.34577 |
| O  | -0.57159 | -1.09859 | -3.03637 |

UM06/6-311+g(d,p)-SMD-water//UB3LYP/6-31G(d)-gas  
HF=-2505.3019133  
UB3LYP-D3/6-311+g(d,p)-SMD-water//UB3LYP/6-31G(d)-gas  
HF=-2506.2165871  
DLPNO-CCSD(T)/def2-TZVPP//uB3LYP/6-31G(d)-gas  
HF = -2503.305941489868  
 $\Delta G_{\text{solv}} = -0.0344223$

C-2

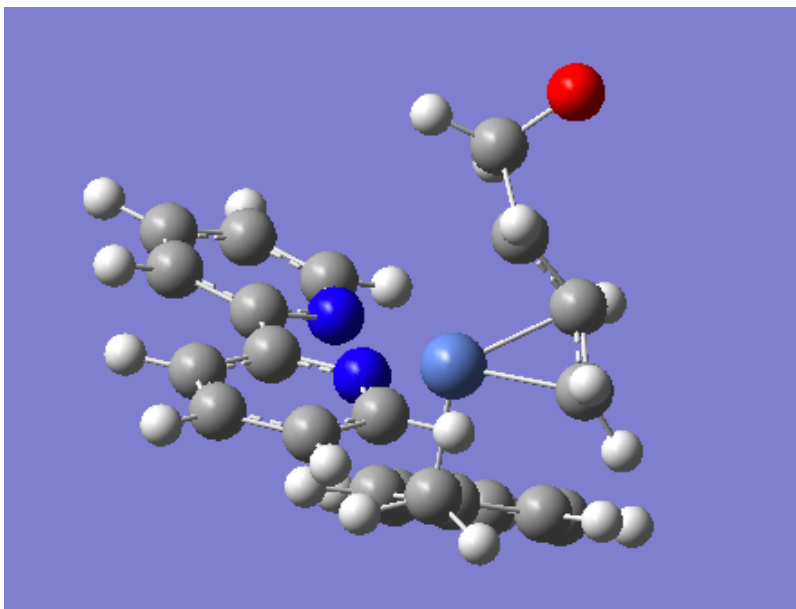

UB3LYP/6-31g(d)-gas

Zero-point correction= 0.369826 (Hartree/Particle)

Thermal correction to Energy= 0.392834

Thermal correction to Enthalpy= 0.393778

Thermal correction to Gibbs Free Energy= 0.314718

Sum of electronic and zero-point Energies= -2505.325775

Sum of electronic and thermal Energies= -2505.302767

Sum of electronic and thermal Enthalpies= -2505.301822

Sum of electronic and thermal Free Energies= -2505.380882

|   |          |          |          |
|---|----------|----------|----------|
| C | -1.62218 | 1.16952  | 1.45613  |
| C | 0.64136  | 1.64826  | 1.75908  |
| C | 0.36976  | 2.50199  | 2.81826  |
| C | -0.96166 | 2.67298  | 3.22143  |
| C | -1.96043 | 1.99619  | 2.53633  |
| C | -2.58406 | 0.42653  | 0.64641  |
| C | -2.82861 | -1.24468 | -0.96177 |
| C | -4.21303 | -1.15034 | -0.91969 |
| C | -4.79843 | -0.207   | -0.06653 |
| C | -3.97444 | 0.58556  | 0.72004  |
| H | 1.65712  | 1.47305  | 1.42634  |
| H | 1.18368  | 3.01643  | 3.31768  |
| H | -1.21053 | 3.3183   | 4.05843  |
| H | -2.99628 | 2.09525  | 2.84174  |
| H | -2.33918 | -1.95915 | -1.60946 |
| H | -4.81458 | -1.80219 | -1.54379 |
| H | -5.87724 | -0.09358 | -0.01901 |
| H | -4.40198 | 1.33262  | 1.37982  |
| N | -0.31851 | 0.99429  | 1.07499  |
| N | -2.01407 | -0.48111 | -0.20702 |

|    |          |          |          |
|----|----------|----------|----------|
| Ni | -0.07667 | -0.34984 | -0.28626 |
| C  | -1.33748 | -3.88112 | 0.24595  |
| C  | -1.33127 | -5.10311 | -0.41138 |
| C  | -0.12065 | -5.72729 | -0.74196 |
| C  | 1.08931  | -5.10658 | -0.40124 |
| C  | 1.09346  | -3.8841  | 0.25448  |
| C  | -0.12247 | -3.22748 | 0.60068  |
| H  | -2.28203 | -3.4096  | 0.50672  |
| H  | -2.27386 | -5.57997 | -0.66769 |
| H  | -0.12019 | -6.68497 | -1.2546  |
| H  | 2.0324   | -5.5878  | -0.64897 |
| H  | 2.03604  | -3.41001 | 0.51768  |
| C  | 1.85701  | -0.2654  | -0.58211 |
| H  | 2.08088  | 0.69529  | -1.05138 |
| H  | 2.54679  | -0.55102 | 0.2092   |
| C  | 1.29698  | -1.29685 | -1.3792  |
| H  | 1.4648   | -2.34436 | -1.13338 |
| C  | 0.26117  | -0.96829 | -2.26673 |
| H  | 0.27091  | 0.02926  | -2.7135  |
| C  | -0.38307 | -2.01817 | -3.16052 |
| H  | -1.40746 | -1.68671 | -3.45706 |
| H  | -0.51077 | -2.96736 | -2.5778  |
| O  | 0.50561  | -2.06785 | -4.17323 |
| C  | -0.12163 | -1.97317 | 1.25659  |
| H  | -0.98792 | -2.25324 | 1.81873  |
| H  | 0.72022  | -1.89755 | 1.9127   |

UM06/6-311+g(d,p)-SMD-water//UB3LYP/6-31G(d)-gas  
 HF=-2505.2895438

C-3

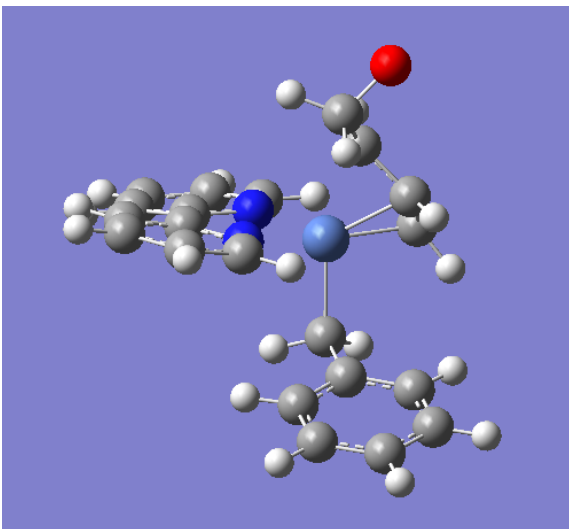

UB3LYP/6-31g(d)-gas

Zero-point correction=

0.369801 (Hartree/Particle)

|                                              |                            |
|----------------------------------------------|----------------------------|
| Thermal correction to Energy=                | 0.392814                   |
| Thermal correction to Enthalpy=              | 0.393758                   |
| Thermal correction to Gibbs Free Energy=     | 0.314635                   |
| Sum of electronic and zero-point Energies=   | -2505.325804               |
| Sum of electronic and thermal Energies=      | -2505.302790               |
| Sum of electronic and thermal Enthalpies=    | -2505.301846               |
| Sum of electronic and thermal Free Energies= | -2505.380970               |
| C                                            | -0.73335 1.60748 1.99082   |
| C                                            | 1.55734 1.29446 2.22856    |
| C                                            | 1.63974 2.2719 3.21585     |
| C                                            | 0.47224 2.92562 3.6044     |
| C                                            | -0.72791 2.59292 2.98322   |
| C                                            | -1.9273 1.23762 1.19858    |
| C                                            | -2.69253 0.00257 -0.61157  |
| C                                            | -3.96139 0.57001 -0.5274   |
| C                                            | -4.21152 1.49454 0.48475   |
| C                                            | -3.18075 1.8392 1.35356    |
| H                                            | 2.43529 0.75735 1.88979    |
| H                                            | 2.59914 2.50877 3.66284    |
| H                                            | 0.49437 3.69226 4.37321    |
| H                                            | -1.64267 3.10406 3.25963   |
| H                                            | -2.43843 -0.71363 -1.38487 |
| H                                            | -4.72725 0.2917 -1.24348   |
| H                                            | -5.18999 1.95403 0.58902   |
| H                                            | -3.34843 2.57701 2.12959   |
| N                                            | 0.40107 0.96325 1.64103    |
| N                                            | -1.70834 0.30719 0.24303   |
| Ni                                           | 0.24493 -0.41575 0.16021   |
| C                                            | 2.52979 -2.75891 1.4011    |
| C                                            | 3.78761 -2.99046 1.95334   |
| C                                            | 4.08378 -2.56029 3.25021   |
| C                                            | 3.10232 -1.89856 3.98924   |
| C                                            | 1.84386 -1.66377 3.43316   |
| C                                            | 1.52489 -2.08862 2.129     |
| H                                            | 2.30972 -3.10079 0.39376   |
| H                                            | 4.54141 -3.51229 1.36893   |
| H                                            | 5.06509 -2.74427 3.67948   |
| H                                            | 3.31281 -1.56961 5.00432   |
| H                                            | 1.08084 -1.16316 4.0255    |
| C                                            | 0.17688 -1.84665 1.54297   |
| H                                            | -0.52366 -1.48446 2.30456  |
| H                                            | -0.22486 -2.75526 1.09854  |
| C                                            | 0.5153 -2.11822 -1.50634   |
| H                                            | -0.5057 -1.99355 -1.80115  |
| H                                            | 0.89017 -3.09511 -1.28262  |
| C                                            | 1.33528 -1.04309 -1.41534  |

|   |          |          |          |
|---|----------|----------|----------|
| H | 2.35628  | -1.16775 | -1.12053 |
| C | 0.79575  | 0.36291  | -1.73734 |
| H | -0.23635 | 0.29478  | -2.01127 |
| C | 1.89285  | 1.40864  | -1.46455 |
| H | 2.69418  | 0.95174  | -0.92232 |
| H | 1.48436  | 2.21198  | -0.88777 |
| O | 2.54991  | 1.74104  | -2.69039 |

UM06/6-311+g(d,p)-SMD-water//UB3LYP/6-31G(d)-gas  
HF=-2505.2896038

C-4

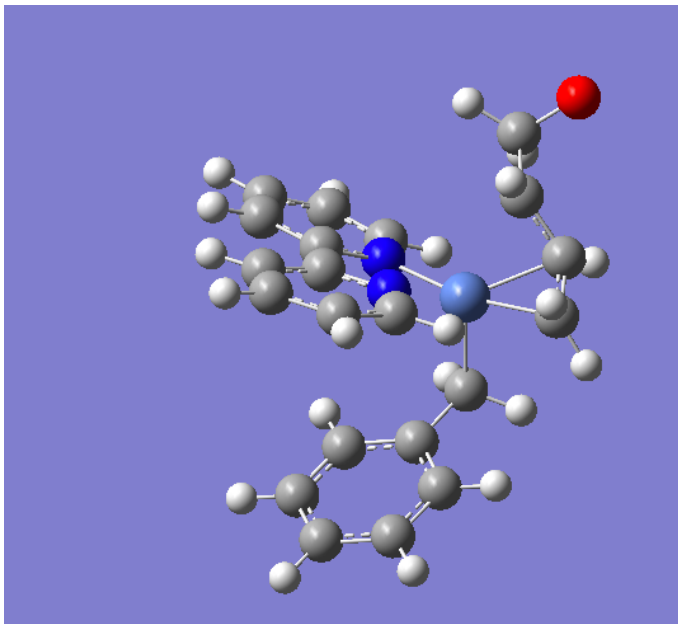

UB3LYP/6-31g(d)-gas  
Zero-point correction= 0.369649 (Hartree/Particle)  
Thermal correction to Energy= 0.392795  
Thermal correction to Enthalpy= 0.393739  
Thermal correction to Gibbs Free Energy= 0.313549  
Sum of electronic and zero-point Energies= -2505.325643  
Sum of electronic and thermal Energies= -2505.302496  
Sum of electronic and thermal Enthalpies= -2505.301552  
Sum of electronic and thermal Free Energies= -2505.381742

|   |          |          |          |
|---|----------|----------|----------|
| C | -1.44374 | 1.77606  | 0.72743  |
| C | 0.8198   | 2.2548   | 1.03038  |
| C | 0.5482   | 3.10853  | 2.08955  |
| C | -0.78322 | 3.27952  | 2.49273  |
| C | -1.78199 | 2.60273  | 1.80763  |
| C | -2.40562 | 1.03307  | -0.08229 |
| C | -2.65016 | -0.63814 | -1.69047 |
| C | -4.03459 | -0.5438  | -1.64839 |
| C | -4.61999 | 0.39954  | -0.79523 |
| C | -3.796   | 1.1921   | -0.00867 |

|    |          |          |          |
|----|----------|----------|----------|
| H  | 1.83557  | 2.07959  | 0.69763  |
| H  | 1.36212  | 3.62297  | 2.58898  |
| H  | -1.03208 | 3.92484  | 3.32973  |
| H  | -2.81783 | 2.70179  | 2.11304  |
| H  | -2.16074 | -1.35261 | -2.33816 |
| H  | -4.63613 | -1.19565 | -2.27249 |
| H  | -5.69879 | 0.51296  | -0.74772 |
| H  | -4.22353 | 1.93916  | 0.65111  |
| N  | -0.14007 | 1.60083  | 0.34629  |
| N  | -1.83563 | 0.12543  | -0.93572 |
| Ni | 0.10178  | 0.2567   | -1.01496 |
| C  | 2.36732  | -2.34947 | 0.82567  |
| C  | 3.59835  | -2.37253 | 1.46551  |
| C  | 3.82681  | -1.57897 | 2.598    |
| C  | 2.79814  | -0.75918 | 3.08294  |
| C  | 1.56452  | -0.72798 | 2.44918  |
| C  | 1.30636  | -1.5232  | 1.29572  |
| H  | 2.19685  | -2.97618 | -0.04651 |
| H  | 4.38909  | -3.01458 | 1.08592  |
| H  | 4.79127  | -1.60161 | 3.09727  |
| H  | 2.96604  | -0.14545 | 3.96469  |
| H  | 0.77069  | -0.09141 | 2.83273  |
| C  | 0.05361  | -1.48258 | 0.63809  |
| H  | -0.78563 | -0.96831 | 1.09309  |
| H  | -0.17001 | -2.17765 | -0.16422 |
| C  | 2.03546  | 0.34114  | -1.31081 |
| H  | 2.25932  | 1.30183  | -1.78009 |
| H  | 2.72524  | 0.05552  | -0.5195  |
| C  | 1.47543  | -0.69031 | -2.1079  |
| H  | 1.64324  | -1.73782 | -1.86208 |
| C  | 0.43961  | -0.36175 | -2.99543 |
| H  | 0.44935  | 0.6358   | -3.4422  |
| C  | -0.20462 | -1.41163 | -3.88922 |
| H  | -1.04484 | -0.89038 | -3.8283  |
| H  | -0.33233 | -2.36082 | -3.3065  |
| O  | -0.19657 | -1.38452 | -5.26588 |

UM06/6-311+g(d,p)-SMD-water//UB3LYP/6-31G(d)-gas  
HF=-2505.2866806  
C-5

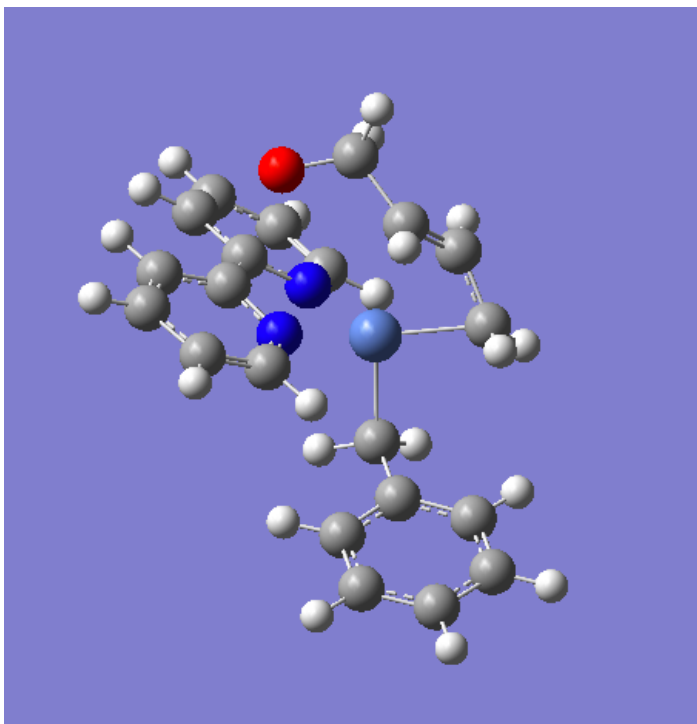

UB3LYP/6-31g(d)-gas

Zero-point correction= 0.369916 (Hartree/Particle)

Thermal correction to Energy= 0.392504

Thermal correction to Enthalpy= 0.393448

Thermal correction to Gibbs Free Energy= 0.317174

Sum of electronic and zero-point Energies= -2505.337060

Sum of electronic and thermal Energies= -2505.314472

Sum of electronic and thermal Enthalpies= -2505.313528

Sum of electronic and thermal Free Energies= -2505.389802

|   |          |          |          |
|---|----------|----------|----------|
| C | -1.13643 | 1.77588  | 0.86103  |
| C | 1.14698  | 1.6353   | 1.2649   |
| C | 1.10976  | 2.71345  | 2.14195  |
| C | -0.11655 | 3.33246  | 2.38168  |
| C | -1.25249 | 2.86166  | 1.73483  |
| C | -2.25341 | 1.23768  | 0.06375  |
| C | -2.86749 | -0.30137 | -1.56745 |
| C | -4.18843 | 0.1243   | -1.55557 |
| C | -4.54594 | 1.14957  | -0.67754 |
| C | -3.57146 | 1.70469  | 0.14326  |
| H | 2.07258  | 1.1099   | 1.05523  |
| H | 2.02226  | 3.06247  | 2.61364  |
| H | -0.18671 | 4.17983  | 3.05741  |
| H | -2.20864 | 3.34559  | 1.89706  |
| H | -2.54182 | -1.11293 | -2.21298 |
| H | -4.91467 | -0.33862 | -2.21647 |
| H | -5.56928 | 1.5096   | -0.63179 |

|    |          |          |          |
|----|----------|----------|----------|
| H  | -3.83189 | 2.49891  | 0.83307  |
| N  | 0.0504   | 1.16376  | 0.65804  |
| N  | -1.91835 | 0.23737  | -0.78319 |
| Ni | -0.05189 | -0.38076 | -0.64957 |
| C  | 1.7794   | -3.35097 | 0.51076  |
| C  | 3.04663  | -3.77398 | 0.90613  |
| C  | 3.69701  | -3.15945 | 1.97752  |
| C  | 3.05003  | -2.12438 | 2.65361  |
| C  | 1.7778   | -1.70409 | 2.26261  |
| C  | 1.0984   | -2.29786 | 1.17333  |
| H  | 1.28705  | -3.82902 | -0.32211 |
| H  | 3.53249  | -4.5899  | 0.37413  |
| H  | 4.68834  | -3.48405 | 2.28299  |
| H  | 3.53492  | -1.64767 | 3.5032   |
| H  | 1.28084  | -0.9189  | 2.82689  |
| C  | -0.23554 | -1.80478 | 0.73391  |
| H  | -0.80259 | -1.40319 | 1.58291  |
| H  | -0.82863 | -2.60682 | 0.27432  |
| C  | 0.62079  | -1.61336 | -2.30596 |
| H  | 1.63756  | -1.93435 | -2.05621 |
| H  | -0.00533 | -2.40989 | -2.7328  |
| C  | 0.3645   | -0.25858 | -2.72754 |
| H  | -0.511   | -0.08552 | -3.36965 |
| C  | 1.03275  | 0.80061  | -2.40501 |
| H  | 1.98761  | 0.72126  | -1.86108 |
| C  | 0.73687  | 2.21812  | -2.86379 |
| H  | 0.06217  | 2.20209  | -3.76173 |
| H  | 1.71133  | 2.65456  | -3.21358 |
| O  | 0.2101   | 2.89133  | -1.85414 |

UM06/6-311+g(d,p)-SMD-water//UB3LYP/6-31G(d)-gas  
HF=-2505.2900261  
C-6



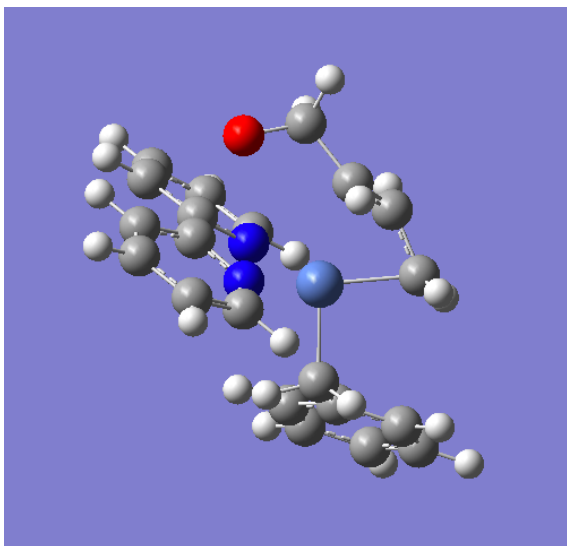

UB3LYP/6-31g(d)-gas

Zero-point correction= 0.369732 (Hartree/Particle)  
 Thermal correction to Energy= 0.392379  
 Thermal correction to Enthalpy= 0.393323  
 Thermal correction to Gibbs Free Energy= 0.316313  
 Sum of electronic and zero-point Energies= -2505.337440  
 Sum of electronic and thermal Energies= -2505.314793  
 Sum of electronic and thermal Enthalpies= -2505.313849  
 Sum of electronic and thermal Free Energies= -2505.390859

|    |          |          |          |
|----|----------|----------|----------|
| C  | -0.87972 | 1.89199  | 0.57811  |
| C  | 1.2328   | 1.30693  | 1.3873   |
| C  | 1.31204  | 2.44265  | 2.17655  |
| C  | 0.21174  | 3.31218  | 2.18774  |
| C  | -0.89273 | 3.03158  | 1.4067   |
| C  | -2.0376  | 1.42902  | -0.2085  |
| C  | -2.94316 | -0.39549 | -1.35897 |
| C  | -4.18613 | 0.20169  | -1.46097 |
| C  | -4.34363 | 1.48448  | -0.9083  |
| C  | -3.27872 | 2.095    | -0.27534 |
| H  | 2.03496  | 0.57533  | 1.36867  |
| H  | 2.19518  | 2.63092  | 2.77691  |
| H  | 0.2222   | 4.20157  | 2.81196  |
| H  | -1.7446  | 3.70001  | 1.39784  |
| H  | -2.75538 | -1.38593 | -1.76545 |
| H  | -5.00445 | -0.31134 | -1.95404 |
| H  | -5.30068 | 1.99474  | -0.97249 |
| H  | -3.38169 | 3.08823  | 0.14336  |
| N  | 0.15625  | 1.01852  | 0.63578  |
| N  | -1.90034 | 0.18963  | -0.74146 |
| Ni | 0.02995  | -0.43224 | -0.72284 |
| C  | -2.59033 | -2.10808 | 0.58976  |

|   |          |          |          |
|---|----------|----------|----------|
| C | -3.81828 | -2.6737  | 0.25448  |
| C | -3.87761 | -3.78702 | -0.58853 |
| C | -2.68931 | -4.32969 | -1.08066 |
| C | -1.46089 | -3.76194 | -0.7413  |
| C | -1.37767 | -2.63294 | 0.09803  |
| H | -2.56019 | -1.25106 | 1.25895  |
| H | -4.73417 | -2.24804 | 0.65761  |
| H | -4.83516 | -4.22943 | -0.84938 |
| H | -2.71656 | -5.20591 | -1.72423 |
| H | -0.54176 | -4.20674 | -1.11574 |
| C | -0.06639 | -2.02845 | 0.45053  |
| H | 0.74358  | -2.75887 | 0.35718  |
| H | -0.07684 | -1.64287 | 1.47459  |
| C | 0.91622  | -1.41062 | -2.23665 |
| H | 1.95672  | -1.38396 | -1.90472 |
| H | 0.58624  | -2.38802 | -2.57604 |
| C | 0.3282   | -0.24107 | -2.79864 |
| H | -0.58333 | -0.36751 | -3.38441 |
| C | 0.59174  | 1.02972  | -2.31258 |
| H | 1.55181  | 1.2408   | -1.83684 |
| C | -0.30661 | 2.23637  | -2.57613 |
| H | -1.19089 | 1.85362  | -3.1449  |
| H | 0.23142  | 2.89086  | -3.30404 |
| O | -0.62714 | 2.91684  | -1.43851 |

UM06/6-311+g(d,p)-SMD-water//UB3LYP/6-31G(d)-gas  
HF=-2505.2893197  
C-7

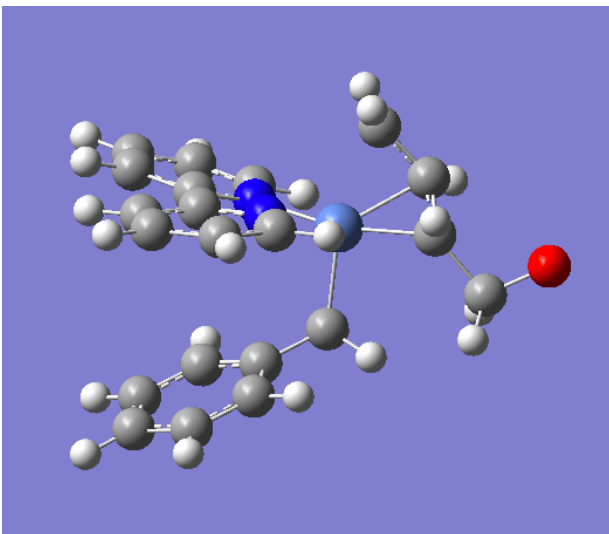

|                                 |                             |
|---------------------------------|-----------------------------|
| UB3LYP/6-31g(d)-gas             |                             |
| Zero-point correction=          | 0.369656 (Hartree/Particle) |
| Thermal correction to Energy=   | 0.392606                    |
| Thermal correction to Enthalpy= | 0.393551                    |

|                                              |                            |
|----------------------------------------------|----------------------------|
| Thermal correction to Gibbs Free Energy=     | 0.315562                   |
| Sum of electronic and zero-point Energies=   | -2505.322197               |
| Sum of electronic and thermal Energies=      | -2505.299246               |
| Sum of electronic and thermal Enthalpies=    | -2505.298302               |
| Sum of electronic and thermal Free Energies= | -2505.376291               |
| C                                            | -1.62298 1.14053 1.48368   |
| C                                            | 0.64055 1.61927 1.78663    |
| C                                            | 0.36895 2.47301 2.84581    |
| C                                            | -0.96246 2.64399 3.24898   |
| C                                            | -1.96124 1.96721 2.56388   |
| C                                            | -2.58487 0.39754 0.67396   |
| C                                            | -2.82941 -1.27367 -0.93422 |
| C                                            | -4.21384 -1.17933 -0.89214 |
| C                                            | -4.79923 -0.23599 -0.03898 |
| C                                            | -3.97525 0.55658 0.74759   |
| H                                            | 1.65632 1.44406 1.45389    |
| H                                            | 1.18287 2.98744 3.34524    |
| H                                            | -1.21133 3.28931 4.08598   |
| H                                            | -2.99708 2.06626 2.86929   |
| H                                            | -2.33998 -1.98813 -1.5819  |
| H                                            | -4.81538 -1.83118 -1.51624 |
| H                                            | -5.87804 -0.12257 0.00854  |
| H                                            | -4.40278 1.30363 1.40737   |
| N                                            | -0.31931 0.9653 1.10254    |
| N                                            | -2.01488 -0.5101 -0.17946  |
| Ni                                           | -0.07747 -0.37883 -0.25871 |
| C                                            | 2.19289 -2.81107 1.41662   |
| C                                            | 3.42392 -2.83413 2.05646   |
| C                                            | 3.65238 -2.04057 3.18895   |
| C                                            | 2.62371 -1.22078 3.67389   |
| C                                            | 1.39009 -1.18958 3.04013   |
| C                                            | 1.13193 -1.9848 1.88667    |
| H                                            | 2.02242 -3.43778 0.54444   |
| H                                            | 4.21466 -3.47618 1.67686   |
| H                                            | 4.61684 -2.06321 3.68822   |
| H                                            | 2.79161 -0.60705 4.55564   |
| H                                            | 0.59626 -0.55301 3.42368   |
| C                                            | 1.85621 -0.29439 -0.55456  |
| H                                            | 2.08007 0.6663 -1.02383    |
| C                                            | 1.29618 -1.32584 -1.35165  |
| H                                            | 1.464 -2.37335 -1.10583    |
| C                                            | 0.26036 -0.99728 -2.23918  |
| H                                            | 0.2701 0.00027 -2.68594    |
| C                                            | -0.12082 -1.94418 1.22904  |
| H                                            | -0.32824 -2.89166 0.77719  |
| H                                            | -0.65255 -1.86624 2.15429  |

```

C      2.83264 -0.6987  0.56559
H      3.13117  0.17261  1.1102
H      2.34991 -1.3858  1.22873
O      3.98549 -1.32031 -0.00838
H      -0.19258 -1.73542 -2.86758
UM06/6-311+g(d,p)-SMD-water//UB3LYP/6-31G(d)-gas
HF=-2505.2911078

```

C-8

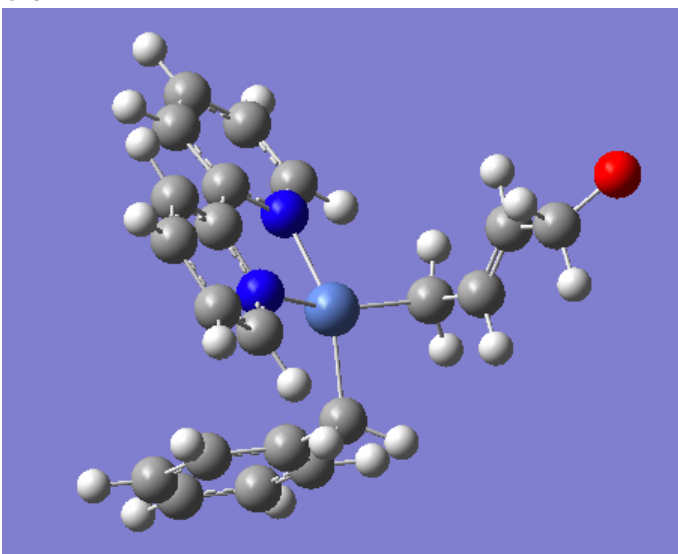

UB3LYP/6-31g(d)-gas

```

Zero-point correction=          0.368391 (Hartree/Particle)
Thermal correction to Energy=    0.391645
Thermal correction to Enthalpy=  0.392589
Thermal correction to Gibbs Free Energy=  0.311125
Sum of electronic and zero-point Energies= -2505.319608
Sum of electronic and thermal Energies= -2505.296354
Sum of electronic and thermal Enthalpies= -2505.295410
Sum of electronic and thermal Free Energies= -2505.376874

```

```

C      -0.10058  1.8885  0.88259
C      2.04099  1.17644  1.48799
C      2.17529  2.1877  2.42141
C      1.10034  3.07566  2.61126
C      -0.0363  2.91885  1.83914
C      -1.21775  1.66917 -0.01978
C      -2.1033  0.2744 -1.67241
C      -3.2528  1.03504 -1.77935
C      -3.37668  2.18227 -0.97469
C      -2.35429  2.49465 -0.09667
H      2.83809  0.45937  1.32403
H      3.09425  2.281  2.9905
H      1.15907  3.86965  3.34961
H      -0.88018  3.587  1.97162

```

|    |          |          |          |
|----|----------|----------|----------|
| H  | -1.96778 | -0.61661 | -2.27602 |
| H  | -4.03474 | 0.74162  | -2.47174 |
| H  | -4.25779 | 2.81355  | -1.03969 |
| H  | -2.42704 | 3.37811  | 0.52834  |
| N  | 0.93847  | 1.00375  | 0.72698  |
| N  | -1.09148 | 0.56335  | -0.82468 |
| Ni | 0.59975  | -0.46153 | -0.53433 |
| C  | -0.46078 | -1.96343 | 2.21832  |
| C  | -1.67215 | -2.45573 | 2.69521  |
| C  | -2.33742 | -3.48093 | 2.01597  |
| C  | -1.76531 | -4.00964 | 0.85489  |
| C  | -0.55336 | -3.51842 | 0.37751  |
| C  | 0.1352   | -2.47551 | 1.04093  |
| H  | 0.05131  | -1.17399 | 2.76428  |
| H  | -2.09767 | -2.04306 | 3.60714  |
| H  | -3.28202 | -3.86681 | 2.38962  |
| H  | -2.26356 | -4.8173  | 0.32347  |
| H  | -0.11394 | -3.95198 | -0.5181  |
| C  | 1.39934  | -1.92063 | 0.5179   |
| H  | 1.95631  | -2.63223 | -0.09841 |
| H  | 2.04791  | -1.54282 | 1.31383  |
| C  | 0.79822  | -1.34515 | -2.29287 |
| H  | 0.0134   | -1.06261 | -2.99433 |
| H  | 0.9662   | -2.41642 | -2.22316 |
| C  | 1.86689  | -0.45146 | -2.07729 |
| H  | 2.83807  | -0.84443 | -1.77868 |
| C  | 1.93329  | 0.86816  | -2.75578 |
| H  | 0.97485  | 1.27296  | -3.08645 |
| C  | 3.03285  | 1.819    | -2.52881 |
| H  | 3.8279   | 1.5609   | -1.82696 |
| H  | 2.86206  | 2.88941  | -2.6555  |
| O  | 3.95474  | 1.95989  | -3.59019 |

UM06/6-311+g(d,p)-SMD-water//UB3LYP/6-31G(d)-gas  
HF=-2505.2711397  
B'

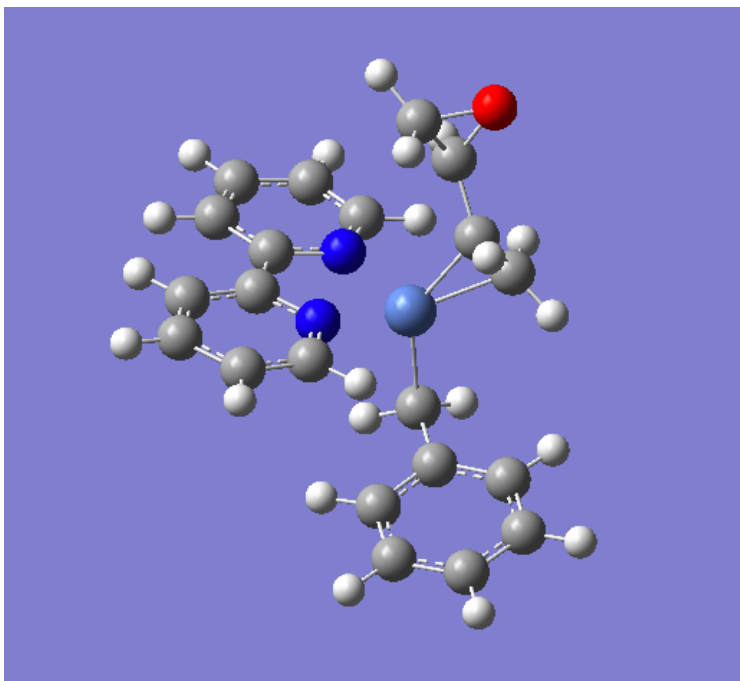

UB3LYP/6-31g(d)-gas

Zero-point correction= 0.370239 (Hartree/Particle)  
 Thermal correction to Energy= 0.393161  
 Thermal correction to Enthalpy= 0.394106  
 Thermal correction to Gibbs Free Energy= 0.313482  
 Sum of electronic and zero-point Energies= -2505.361098  
 Sum of electronic and thermal Energies= -2505.338175  
 Sum of electronic and thermal Enthalpies= -2505.337231  
 Sum of electronic and thermal Free Energies= -2505.417854

|   |          |          |          |
|---|----------|----------|----------|
| C | -1.08408 | 1.75012  | 0.69367  |
| C | 1.20805  | 1.4324   | 0.92934  |
| C | 1.31986  | 2.51277  | 1.79753  |
| C | 0.17173  | 3.23828  | 2.11524  |
| C | -1.04231 | 2.84826  | 1.55937  |
| C | -2.32473 | 1.25743  | 0.05758  |
| C | -3.19768 | -0.16329 | -1.55011 |
| C | -4.50409 | 0.21548  | -1.25762 |
| C | -4.71089 | 1.15569  | -0.24603 |
| C | -3.60965 | 1.68102  | 0.4217   |
| H | 2.06897  | 0.82662  | 0.67327  |
| H | 2.28763  | 2.77115  | 2.21412  |
| H | 0.21964  | 4.09302  | 2.7832   |
| H | -1.94679 | 3.40226  | 1.78355  |
| H | -2.98412 | -0.89679 | -2.32327 |
| H | -5.33434 | -0.21716 | -1.80642 |
| H | -5.71495 | 1.47037  | 0.0227   |
| H | -3.75112 | 2.39786  | 1.22303  |

|    |          |          |          |
|----|----------|----------|----------|
| N  | 0.04077  | 1.05826  | 0.37497  |
| N  | -2.13    | 0.34052  | -0.91687 |
| Ni | -0.11549 | -0.3651  | -0.978   |
| C  | 1.8752   | -3.05474 | 0.46009  |
| C  | 3.08711  | -3.34317 | 1.08223  |
| C  | 3.41955  | -2.74473 | 2.30161  |
| C  | 2.51274  | -1.86055 | 2.8886   |
| C  | 1.30057  | -1.57219 | 2.26112  |
| C  | 0.94589  | -2.15456 | 1.02571  |
| H  | 1.62974  | -3.54356 | -0.4801  |
| H  | 3.77497  | -4.04587 | 0.61733  |
| H  | 4.36351  | -2.97313 | 2.78918  |
| H  | 2.74479  | -1.39979 | 3.84657  |
| H  | 0.59517  | -0.89906 | 2.7439   |
| C  | -0.33231 | -1.82424 | 0.35176  |
| H  | -1.06937 | -1.46494 | 1.08141  |
| H  | -0.74897 | -2.69932 | -0.15538 |
| C  | 0.13302  | -1.60994 | -2.47576 |
| H  | -0.70148 | -1.50203 | -3.17391 |
| H  | 0.41179  | -2.64307 | -2.28903 |
| C  | 1.14787  | -0.61584 | -2.46573 |
| H  | 2.17897  | -0.84164 | -2.19988 |
| C  | 0.69765  | 0.72139  | -2.57881 |
| H  | -0.14932 | 0.91912  | -3.23509 |
| C  | 1.65112  | 1.8969   | -2.44166 |
| H  | 2.43771  | 1.65923  | -1.6992  |
| H  | 1.11032  | 2.80091  | -2.10134 |
| O  | 1.54377  | 1.15542  | -3.7495  |

UM06/6-311+g(d,p)-SMD-water//UB3LYP/6-31G(d)-gas

HF=-2505.3023645

UB3LYP-D3/6-311+g(d,p)-SMD-water//UB3LYP/6-31G(d)-gas

HF=-2506.2104688

DLPNO-CCSD(T)/def2-TZVPP//uB3LYP/6-31G(d)-gas

HF = -2503.329788687910

$\Delta G_{\text{solv}} = -0.0193036$

B'-2

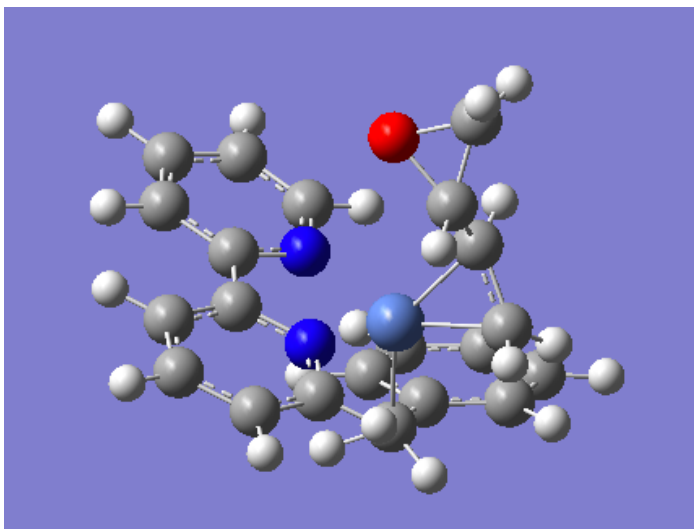

UB3LYP/6-31g(d)-gas

Zero-point correction= 0.370190 (Hartree/Particle)

Thermal correction to Energy= 0.393104

Thermal correction to Enthalpy= 0.394049

Thermal correction to Gibbs Free Energy= 0.314332

Sum of electronic and zero-point Energies= -2505.362509

Sum of electronic and thermal Energies= -2505.339594

Sum of electronic and thermal Enthalpies= -2505.338650

Sum of electronic and thermal Free Energies= -2505.418367

|    |          |          |          |
|----|----------|----------|----------|
| C  | 0.46891  | 2.22078  | 1.03004  |
| C  | 2.42025  | 1.24427  | 1.8697   |
| C  | 2.69731  | 2.33605  | 2.67462  |
| C  | 1.7827   | 3.40079  | 2.66895  |
| C  | 0.66014  | 3.3399   | 1.8665   |
| C  | -0.75638 | 1.96626  | 0.25058  |
| C  | -1.96456 | 0.32846  | -0.90454 |
| C  | -3.08325 | 1.13605  | -1.00517 |
| C  | -3.01556 | 2.42486  | -0.44975 |
| C  | -1.8607  | 2.83909  | 0.18559  |
| H  | 3.07226  | 0.37448  | 1.85222  |
| H  | 3.58429  | 2.34796  | 3.29817  |
| H  | 1.95008  | 4.26875  | 3.30087  |
| H  | -0.04972 | 4.15733  | 1.84873  |
| H  | -1.9545  | -0.68152 | -1.30391 |
| H  | -3.97812 | 0.77482  | -1.49986 |
| H  | -3.86893 | 3.09439  | -0.51306 |
| H  | -1.78899 | 3.83421  | 0.6066   |
| N  | 1.32855  | 1.17382  | 1.09003  |
| N  | -0.83642 | 0.72262  | -0.28404 |
| Ni | 0.96242  | -0.22345 | -0.27487 |
| C  | -1.56249 | -2.67354 | 0.91222  |



|   |          |          |          |
|---|----------|----------|----------|
| C | -2.493   | -3.6545  | 0.57036  |
| C | -2.08543 | -4.81463 | -0.09164 |
| C | -0.73268 | -4.98137 | -0.3992  |
| C | 0.19419  | -3.9985  | -0.05708 |
| C | -0.19556 | -2.81643 | 0.60302  |
| H | -1.89095 | -1.78046 | 1.43917  |
| H | -3.54001 | -3.51546 | 0.82973  |
| H | -2.80863 | -5.58151 | -0.35559 |
| H | -0.39668 | -5.88562 | -0.9013  |
| H | 1.24658  | -4.15102 | -0.28855 |
| C | 0.78318  | -1.75973 | 0.96693  |
| H | 1.78773  | -2.18279 | 1.09092  |
| H | 0.49149  | -1.26713 | 1.89993  |
| C | 1.70888  | -1.3298  | -1.7777  |
| H | 2.75666  | -1.43289 | -1.48559 |
| H | 1.23339  | -2.2593  | -2.07381 |
| C | 1.27443  | -0.09672 | -2.34676 |
| H | 0.34344  | -0.09952 | -2.91443 |
| C | 1.73343  | 1.12438  | -1.87845 |
| H | 2.71771  | 1.18467  | -1.40867 |
| C | 1.04063  | 2.46017  | -2.12508 |
| H | 0.08058  | 2.23201  | -2.65144 |
| H | 1.65022  | 3.00972  | -2.88269 |
| O | 1.29746  | 1.76525  | -0.6817  |

UM06/6-311+g(d,p)-SMD-water//UB3LYP/6-31G(d)-gas  
HF=-2505.3027151  
B'-3

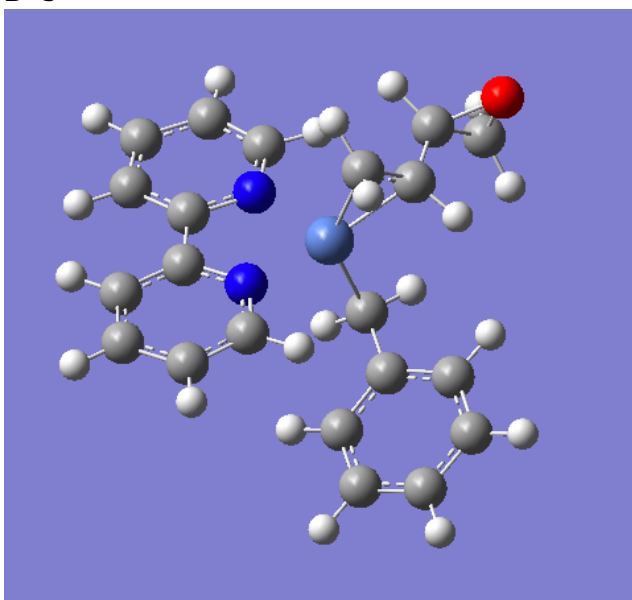

UB3LYP/6-31g(d)-gas  
Zero-point correction= 0.370276 (Hartree/Particle)  
Thermal correction to Energy= 0.393202

|                                              |                            |
|----------------------------------------------|----------------------------|
| Thermal correction to Enthalpy=              | 0.394146                   |
| Thermal correction to Gibbs Free Energy=     | 0.314682                   |
| Sum of electronic and zero-point Energies=   | -2505.359391               |
| Sum of electronic and thermal Energies=      | -2505.336465               |
| Sum of electronic and thermal Enthalpies=    | -2505.335521               |
| Sum of electronic and thermal Free Energies= | -2505.414985               |
| C                                            | -1.13741 1.79406 0.98483   |
| C                                            | 1.15328 1.48104 1.22257    |
| C                                            | 1.23568 2.45849 2.20987    |
| C                                            | 0.06818 3.1122 2.59842     |
| C                                            | -1.13197 2.7795 1.97723    |
| C                                            | -2.33136 1.4242 0.19259    |
| C                                            | -3.09659 0.18915 -1.61755  |
| C                                            | -4.36545 0.75659 -1.53338  |
| C                                            | -4.61558 1.68112 -0.52123  |
| C                                            | -3.58481 2.02579 0.34758   |
| H                                            | 2.03123 0.94393 0.8838     |
| H                                            | 2.19508 2.69535 2.65686    |
| H                                            | 0.09031 3.87884 3.36723    |
| H                                            | -2.04673 3.29064 2.25365   |
| H                                            | -2.84249 -0.52705 -2.39085 |
| H                                            | -5.13131 0.47828 -2.24946  |
| H                                            | -5.59405 2.14062 -0.41697  |
| H                                            | -3.75249 2.76359 1.1236    |
| N                                            | -0.00299 1.14983 0.63504   |
| N                                            | -2.1124 0.49377 -0.76296   |
| Ni                                           | -0.15913 -0.22916 -0.84577 |
| C                                            | 2.12573 -2.57233 0.39512   |
| C                                            | 3.38355 -2.80388 0.94735   |
| C                                            | 3.67972 -2.3737 2.24423    |
| C                                            | 2.69826 -1.71197 2.98325   |
| C                                            | 1.4398 -1.47718 2.42718    |
| C                                            | 1.12083 -1.90204 1.12302   |
| H                                            | 1.90566 -2.91421 -0.61222  |
| H                                            | 4.13735 -3.3257 0.36294    |
| H                                            | 4.66103 -2.55769 2.67349   |
| H                                            | 2.90875 -1.38302 3.99834   |
| H                                            | 0.67678 -0.97658 3.01952   |
| C                                            | -0.22718 -1.66007 0.53699  |
| H                                            | -0.92772 -1.29788 1.29858  |
| H                                            | -0.62892 -2.56868 0.09256  |
| C                                            | 1.73109 1.07886 -1.98152   |
| H                                            | 1.0737 1.90427 -2.15883    |
| H                                            | 2.65957 1.23631 -1.47355   |
| C                                            | 1.39179 -0.16528 -2.39812  |
| H                                            | 2.04919 -0.99068 -2.22082  |

```

C      0.05548 -0.39189 -3.12923
H     -0.46579  0.53851 -3.21611
C     -0.04171 -1.86209 -3.57719
H     -1.06855 -2.16239 -3.59496
H      0.4989  -2.48039 -2.89137
O      0.29369 -1.96107 -4.96377
UM06/6-311+g(d,p)-SMD-water//UB3LYP/6-31G(d)-gas
HF=-2505.3017847
B'-4

```

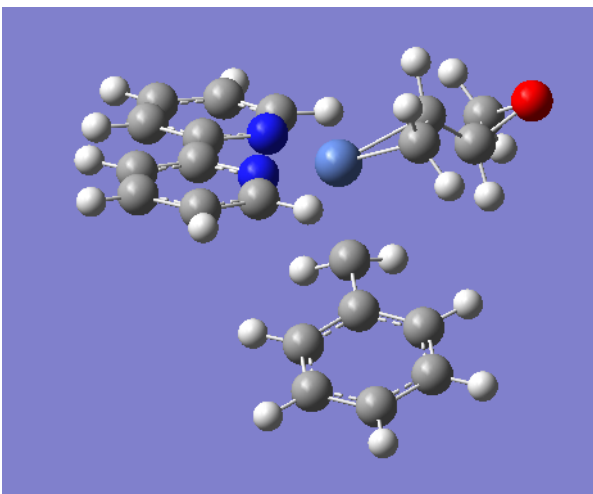

```

UB3LYP/6-31g(d)-gas
Zero-point correction=          0.370248 (Hartree/Particle)
Thermal correction to Energy=    0.393125
Thermal correction to Enthalpy=  0.394070
Thermal correction to Gibbs Free Energy=  0.314670
Sum of electronic and zero-point Energies= -2505.353593
Sum of electronic and thermal Energies= -2505.330716
Sum of electronic and thermal Enthalpies= -2505.329771
Sum of electronic and thermal Free Energies= -2505.409171
C      -1.0631  1.82374  1.03736
C      1.22759  1.51072  1.27509
C      1.30999  2.48816  2.26239
C      0.14249  3.14188  2.65094
C     -1.05766  2.80918  2.02976
C     -2.25705  1.45388  0.24512
C     -3.02228  0.21883 -1.56503
C     -4.29114  0.78627 -1.48086
C     -4.54127  1.7108  -0.46871
C     -3.5105  2.05546  0.4001
H      2.10555  0.97361  0.93633
H      2.26939  2.72503  2.70938
H      0.16462  3.90852  3.41975
H     -1.97242  3.32032  2.30617
H     -2.76818 -0.49737 -2.33833

```

|    |          |          |          |
|----|----------|----------|----------|
| H  | -5.057   | 0.50796  | -2.19694 |
| H  | -5.51974 | 2.17029  | -0.36445 |
| H  | -3.67818 | 2.79327  | 1.17612  |
| N  | 0.07132  | 1.17951  | 0.68757  |
| N  | -2.03809 | 0.52345  | -0.71044 |
| Ni | -0.08482 | -0.19949 | -0.79325 |
| C  | 2.20004  | -2.54265 | 0.44764  |
| C  | 3.45786  | -2.7742  | 0.99988  |
| C  | 3.75403  | -2.34402 | 2.29675  |
| C  | 2.77257  | -1.68229 | 3.03577  |
| C  | 1.51411  | -1.44751 | 2.4797   |
| C  | 1.19514  | -1.87236 | 1.17554  |
| H  | 1.97997  | -2.88453 | -0.5597  |
| H  | 4.21166  | -3.29603 | 0.41547  |
| H  | 4.73534  | -2.52801 | 2.72602  |
| H  | 2.98306  | -1.35335 | 4.05086  |
| H  | 0.75109  | -0.9469  | 3.07204  |
| C  | -0.15287 | -1.63039 | 0.58951  |
| H  | -0.85341 | -1.2682  | 1.3511   |
| H  | -0.55461 | -2.539   | 0.14508  |
| C  | 2.07877  | -0.65719 | -1.7521  |
| H  | 2.13387  | -1.69386 | -1.49289 |
| H  | 2.7746   | 0.03618  | -1.32788 |
| C  | 1.13071  | -0.21937 | -2.61584 |
| H  | 1.0756   | 0.8173   | -2.87505 |
| C  | 0.12923  | -1.2173  | -3.2264  |
| H  | 0.33424  | -2.20001 | -2.85608 |
| C  | -0.89321 | -0.45517 | -4.08976 |
| H  | -0.80609 | 0.59468  | -3.90237 |
| H  | -1.88199 | -0.78078 | -3.84242 |
| O  | -0.49923 | -0.51902 | -5.46293 |

UM06/6-311+g(d,p)-SMD-water//UB3LYP/6-31G(d)-gas  
HF=-2505.297009  
C-TSL-1

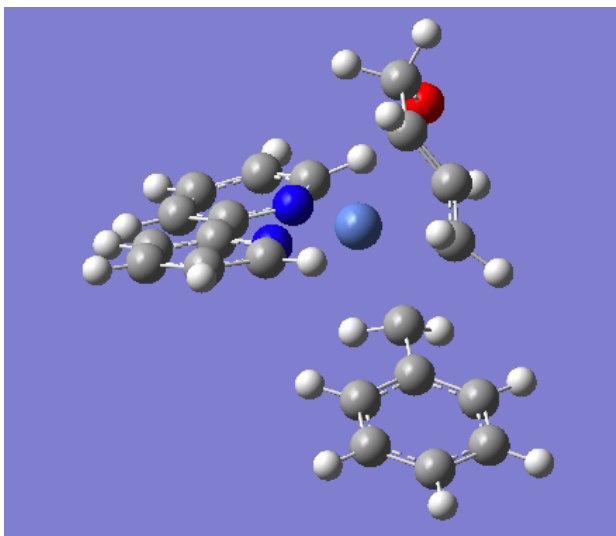

UB3LYP/6-31g(d)-gas

Imaginary frequency = -372.50 cm<sup>-1</sup>

Zero-point correction= 0.368419 (Hartree/Particle)

Thermal correction to Energy= 0.390471

Thermal correction to Enthalpy= 0.391415

Thermal correction to Gibbs Free Energy= 0.315259

Sum of electronic and zero-point Energies= -2505.302546

Sum of electronic and thermal Energies= -2505.280494

Sum of electronic and thermal Enthalpies= -2505.279550

Sum of electronic and thermal Free Energies= -2505.355706

|    |          |          |          |
|----|----------|----------|----------|
| C  | -1.45976 | 1.0688   | 1.43578  |
| C  | 0.80377  | 1.54754  | 1.73872  |
| C  | 0.53218  | 2.40127  | 2.7979   |
| C  | -0.79924 | 2.57226  | 3.20107  |
| C  | -1.79802 | 1.89547  | 2.51598  |
| C  | -2.42164 | 0.32581  | 0.62606  |
| C  | -2.66619 | -1.3454  | -0.98213 |
| C  | -4.05061 | -1.25106 | -0.94005 |
| C  | -4.63601 | -0.30772 | -0.08689 |
| C  | -3.81203 | 0.48484  | 0.69968  |
| H  | 1.81954  | 1.37233  | 1.40598  |
| H  | 1.3461   | 2.91571  | 3.29733  |
| H  | -1.04811 | 3.21758  | 4.03807  |
| H  | -2.83386 | 1.99453  | 2.82138  |
| H  | -2.17676 | -2.05987 | -1.62981 |
| H  | -4.65216 | -1.90291 | -1.56414 |
| H  | -5.71482 | -0.1943  | -0.03937 |
| H  | -4.23956 | 1.2319   | 1.35946  |
| N  | -0.15609 | 0.89357  | 1.05464  |
| N  | -1.85166 | -0.58183 | -0.22737 |
| Ni | -0.09138 | -0.15237 | -0.29102 |

|   |          |          |          |
|---|----------|----------|----------|
| C | 1.40658  | 0.18509  | -1.935   |
| H | 0.90422  | 1.14578  | -1.80097 |
| H | 2.43233  | 0.54569  | -1.8985  |
| C | 1.20205  | -0.77633 | -2.95809 |
| H | 2.03807  | -1.42333 | -3.21946 |
| C | -0.09025 | -1.29006 | -3.1442  |
| H | -1.05817 | -0.98736 | -2.73639 |
| C | -0.38933 | -2.31718 | -4.22665 |
| H | -1.20326 | -1.90427 | -4.87025 |
| H | -0.88647 | -2.96965 | -3.46247 |
| O | 0.63006  | -2.8819  | -4.90469 |
| C | 1.79629  | -1.3945  | -0.32846 |
| H | 1.67602  | -1.63567 | 0.70705  |
| C | 3.2946   | -1.23918 | -0.6487  |
| C | 4.05806  | -0.2889  | 0.02994  |
| C | 3.88844  | -2.04856 | -1.6171  |
| C | 5.41491  | -0.14764 | -0.2603  |
| H | 3.58942  | 0.34958  | 0.79281  |
| C | 5.2459   | -1.90806 | -1.90685 |
| H | 3.28689  | -2.7977  | -2.15195 |
| C | 6.00914  | -0.9577  | -1.22875 |
| H | 6.01661  | 0.60179  | 0.27413  |
| H | 5.71394  | -2.54664 | -2.67015 |
| H | 7.079    | -0.84618 | -1.45738 |
| H | 1.48655  | -2.28206 | -0.58223 |

UM06/6-311+g(d,p)-SMD-water//UB3LYP/6-31G(d)-gas  
HF=-2505.2785411  
C-TS<sub>L</sub>-2

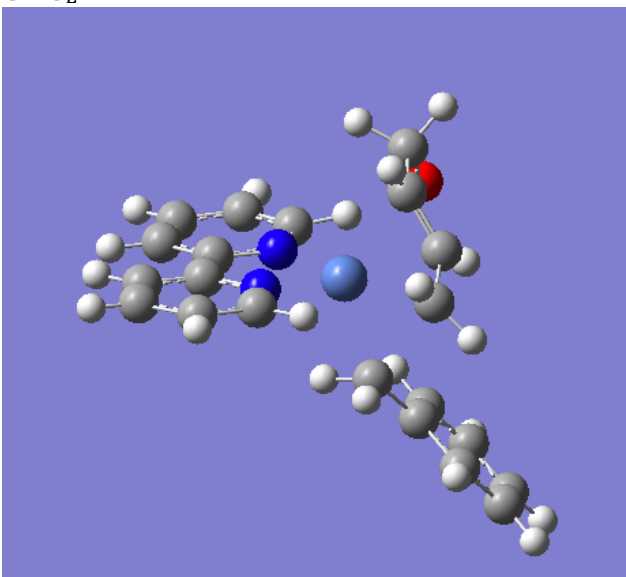

UB3LYP/6-31g(d)-gas  
Imaginary frequency = -371.89 cm<sup>-1</sup>

|                                              |                             |
|----------------------------------------------|-----------------------------|
| Zero-point correction=                       | 0.372838 (Hartree/Particle) |
| Thermal correction to Energy=                | 0.393787                    |
| Thermal correction to Enthalpy=              | 0.394731                    |
| Thermal correction to Gibbs Free Energy=     | 0.322265                    |
| Sum of electronic and zero-point Energies=   | -2505.320583                |
| Sum of electronic and thermal Energies=      | -2505.299634                |
| Sum of electronic and thermal Enthalpies=    | -2505.298690                |
| Sum of electronic and thermal Free Energies= | -2505.371156                |
| C                                            | -1.00887 0.76959 0.9193     |
| C                                            | 0.95985 1.84477 0.30467     |
| C                                            | 0.82981 2.78452 1.32068     |
| C                                            | -0.26802 2.68807 2.17709    |
| C                                            | -1.19467 1.67128 1.97328    |
| C                                            | -1.96964 -0.29399 0.55778   |
| C                                            | -2.53694 -1.84132 -1.11276  |
| C                                            | -3.7095 -2.17213 -0.42601   |
| C                                            | -3.98906 -1.57106 0.79729   |
| C                                            | -3.11558 -0.60034 1.29042   |
| H                                            | 1.81113 1.86631 -0.36859    |
| H                                            | 1.57289 3.56656 1.43479     |
| H                                            | -0.40504 3.399 2.98643      |
| H                                            | -2.06442 1.58931 2.61478    |
| H                                            | -2.31825 -2.15008 -2.16778  |
| H                                            | -4.39147 -2.89228 -0.86713  |
| H                                            | -4.88339 -1.8311 1.35702    |
| H                                            | -3.33206 -0.09382 2.22474   |
| N                                            | 0.07426 0.85393 0.10338     |
| N                                            | -1.67365 -0.93729 -0.60047  |
| Ni                                           | 0.10196 -0.52445 -1.37993   |
| C                                            | 1.76253 -0.7881 -2.68121    |
| H                                            | 2.1678 0.22457 -2.60622     |
| H                                            | 2.54856 -1.49445 -2.92374   |
| C                                            | 0.48766 -0.97926 -3.33515   |
| H                                            | 0.15873 -1.97837 -3.62657   |
| C                                            | -0.50762 -0.0183 -3.36826   |
| H                                            | -0.26549 1.05033 -3.35161   |
| C                                            | -1.89165 -0.45982 -3.87015  |
| H                                            | -1.97828 0.01892 -4.88624   |
| C                                            | 1.86433 -1.64896 -0.77148   |
| H                                            | 1.19413 -1.61143 0.09645    |
| C                                            | 3.23936 -1.28678 -0.34376   |
| C                                            | 3.46652 -0.44167 0.75833    |
| C                                            | 4.37014 -1.78998 -1.01499   |
| C                                            | 4.75744 -0.09606 1.15612    |
| H                                            | 2.61683 -0.07286 1.32633    |
| C                                            | 5.66202 -1.44752 -0.62012   |

|   |          |          |          |
|---|----------|----------|----------|
| H | 4.23464  | -2.47645 | -1.84776 |
| C | 5.86423  | -0.59166 | 0.46457  |
| H | 4.89901  | 0.55307  | 2.01686  |
| H | 6.51376  | -1.85812 | -1.15632 |
| H | 6.87101  | -0.32607 | 0.775    |
| H | 1.8084   | -2.65362 | -1.19011 |
| O | -2.8171  | 0.30385  | -3.09217 |
| H | -2.03791 | -1.51973 | -3.85993 |

UM06/6-311+g(d,p)-SMD-water//UB3LYP/6-31G(d)-gas  
HF=-2505.2824389  
C-TS<sub>L</sub>-3

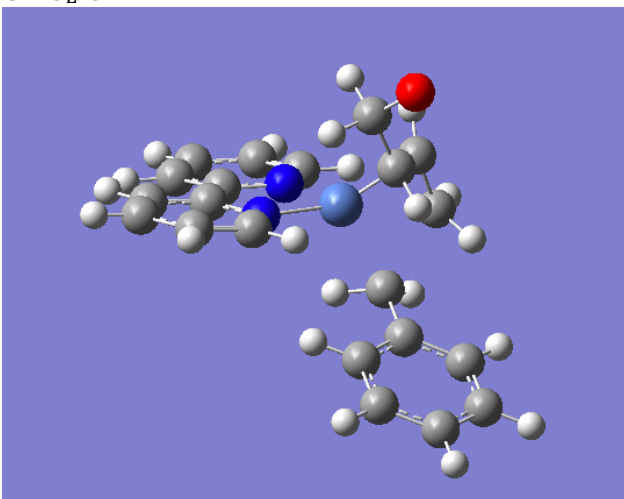

UB3LYP/6-31g(d)-gas  
Imaginary frequency = -371.87 cm<sup>-1</sup>  
Zero-point correction= 0.367897 (Hartree/Particle)  
Thermal correction to Energy= 0.390308  
Thermal correction to Enthalpy= 0.391252  
Thermal correction to Gibbs Free Energy= 0.313707  
Sum of electronic and zero-point Energies= -2505.285711  
Sum of electronic and thermal Energies= -2505.263300  
Sum of electronic and thermal Enthalpies= -2505.262356  
Sum of electronic and thermal Free Energies= -2505.339901

|   |          |          |         |
|---|----------|----------|---------|
| C | -1.88171 | 1.04522  | 1.34899 |
| C | -0.24139 | 2.48591  | 0.48394 |
| C | -0.66074 | 3.52516  | 1.29052 |
| C | -1.73951 | 3.31456  | 2.17007 |
| C | -2.34356 | 2.06702  | 2.19093 |
| C | -2.4771  | -0.27864 | 1.26072 |
| C | -2.49572 | -2.28282 | 0.05787 |
| C | -3.45708 | -2.83922 | 0.88286 |
| C | -3.94539 | -2.06607 | 1.95382 |
| C | -3.44889 | -0.78775 | 2.14251 |
| H | 0.59888  | 2.60357  | -0.1909 |



|    |          |          |          |
|----|----------|----------|----------|
| H  | -0.15483 | 4.48364  | 1.23802  |
| H  | -2.09775 | 4.11229  | 2.81295  |
| H  | -3.19183 | 1.88452  | 2.84239  |
| H  | -2.08651 | -2.84194 | -0.77981 |
| H  | -3.81905 | -3.8452  | 0.69877  |
| H  | -4.6939  | -2.46856 | 2.62982  |
| H  | -3.79281 | -0.18627 | 2.97728  |
| N  | -0.82043 | 1.2557   | 0.48987  |
| N  | -2.01282 | -1.03494 | 0.21756  |
| Ni | -0.45958 | -0.14557 | -0.75594 |
| C  | 0.49173  | -1.59695 | -1.99981 |
| H  | 1.55745  | -1.61563 | -2.22436 |
| H  | 0.04368  | -2.58378 | -2.11171 |
| C  | -0.25169 | -0.50987 | -2.63122 |
| H  | -1.20267 | -0.7056  | -3.12654 |
| C  | 0.19981  | 0.81156  | -2.40439 |
| H  | 1.27439  | 0.98961  | -2.3215  |
| C  | -0.57827 | 1.99405  | -2.95909 |
| O  | -0.14652 | 2.43733  | -4.16757 |
| H  | -0.49526 | 2.84847  | -2.24476 |
| H  | -1.67032 | 1.76318  | -2.9546  |
| C  | 1.04378  | -1.66985 | -0.05001 |
| H  | 0.42463  | -1.43754 | 0.81874  |
| C  | 2.42202  | -1.1337  | 0.08621  |
| C  | 2.6741   | 0.07099  | 0.7678   |
| C  | 3.52053  | -1.81519 | -0.4677  |
| C  | 3.96853  | 0.57112  | 0.89182  |
| H  | 1.84321  | 0.61034  | 1.21524  |
| C  | 4.81656  | -1.31259 | -0.35137 |
| H  | 3.35568  | -2.75926 | -0.98297 |
| C  | 5.04707  | -0.1155  | 0.32786  |
| H  | 4.13739  | 1.49938  | 1.43197  |
| H  | 5.64795  | -1.86147 | -0.78633 |
| H  | 6.05615  | 0.27645  | 0.42149  |
| H  | 1.04179  | -2.75614 | -0.13945 |

UM06/6-311+g(d,p)-SMD-water//UB3LYP/6-31G(d)-gas  
HF=-2505.2776618  
C-TS<sub>L</sub>-4

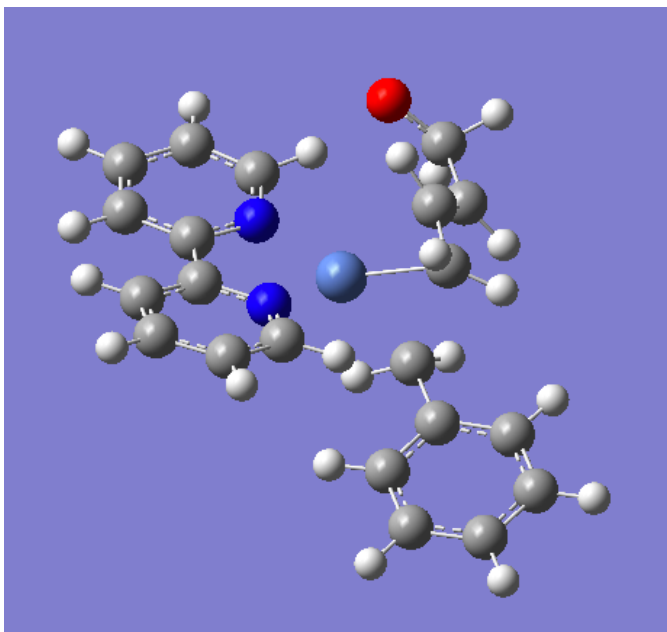

UB3LYP/6-31g(d)-gas

Imaginary frequency =  $-409.97 \text{ cm}^{-1}$

Zero-point correction= 0.367346 (Hartree/Particle)

Thermal correction to Energy= 0.389708

Thermal correction to Enthalpy= 0.390652

Thermal correction to Gibbs Free Energy= 0.313773

Sum of electronic and zero-point Energies= -2505.292666

Sum of electronic and thermal Energies= -2505.270304

Sum of electronic and thermal Enthalpies= -2505.269360

Sum of electronic and thermal Free Energies= -2505.346240

|   |          |          |          |
|---|----------|----------|----------|
| C | -1.45976 | 1.0688   | 1.43578  |
| C | 0.80377  | 1.54754  | 1.73872  |
| C | 0.53218  | 2.40127  | 2.7979   |
| C | -0.79924 | 2.57226  | 3.20107  |
| C | -1.79802 | 1.89547  | 2.51598  |
| C | -2.42164 | 0.32581  | 0.62606  |
| C | -2.66619 | -1.3454  | -0.98213 |
| C | -4.05061 | -1.25106 | -0.94005 |
| C | -4.63601 | -0.30772 | -0.08689 |
| C | -3.81203 | 0.48484  | 0.69968  |
| H | 1.81954  | 1.37233  | 1.40598  |
| H | 1.3461   | 2.91571  | 3.29733  |
| H | -1.04811 | 3.21758  | 4.03807  |
| H | -2.83386 | 1.99453  | 2.82138  |
| H | -2.17676 | -2.05987 | -1.62981 |
| H | -4.65216 | -1.90291 | -1.56414 |
| H | -5.71482 | -0.1943  | -0.03937 |
| H | -4.23956 | 1.2319   | 1.35946  |
| N | -0.15609 | 0.89357  | 1.05464  |

|    |          |          |          |
|----|----------|----------|----------|
| N  | -1.85166 | -0.58183 | -0.22737 |
| Ni | -0.09138 | -0.15237 | -0.29102 |
| C  | 1.46627  | 0.07254  | -1.93851 |
| H  | 2.45424  | -0.2411  | -2.2832  |
| H  | 1.5396   | 1.15792  | -1.94859 |
| C  | 0.31301  | -0.40294 | -2.61437 |
| H  | -0.61306 | 0.15649  | -2.49074 |
| C  | 0.48455  | -1.10309 | -3.81809 |
| H  | 1.37745  | -1.50466 | -4.30418 |
| C  | -0.70351 | -1.65135 | -4.59531 |
| H  | -0.4112  | -2.64958 | -5.00185 |
| H  | -0.50825 | -0.90548 | -5.40919 |
| O  | -1.93326 | -1.60825 | -4.04426 |
| C  | 1.79629  | -1.3945  | -0.32846 |
| H  | 1.67602  | -1.63567 | 0.70705  |
| C  | 3.2946   | -1.23918 | -0.6487  |
| C  | 4.05806  | -0.2889  | 0.02994  |
| C  | 3.88844  | -2.04856 | -1.6171  |
| C  | 5.41491  | -0.14764 | -0.2603  |
| H  | 3.58942  | 0.34958  | 0.79281  |
| C  | 5.2459   | -1.90806 | -1.90685 |
| H  | 3.28689  | -2.7977  | -2.15195 |
| C  | 6.00914  | -0.9577  | -1.22875 |
| H  | 6.01661  | 0.60179  | 0.27413  |
| H  | 5.71394  | -2.54664 | -2.67015 |
| H  | 7.079    | -0.84618 | -1.45738 |
| H  | 1.48655  | -2.28206 | -0.58223 |

UM06/6-311+g(d,p)-SMD-water//UB3LYP/6-31G(d)-gas  
HF=-2505.2709984  
C-TS<sub>L</sub>-5

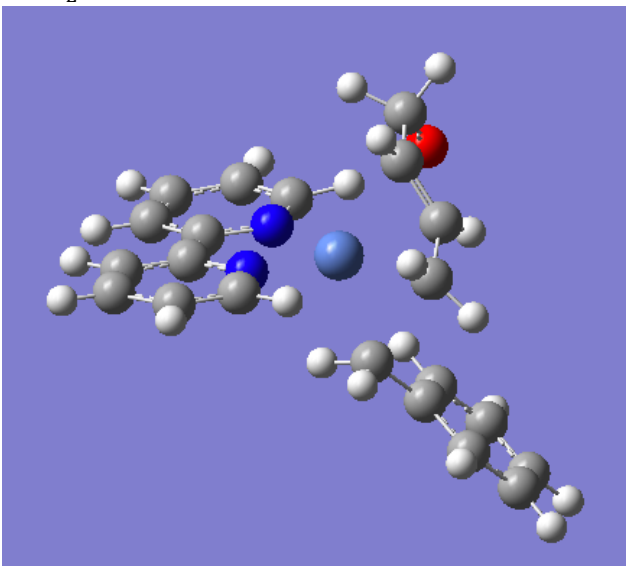

UB3LYP/6-31g(d)-gas

Imaginary frequency = -384.55 cm<sup>-1</sup>

|                                              |                             |
|----------------------------------------------|-----------------------------|
| Zero-point correction=                       | 0.368151 (Hartree/Particle) |
| Thermal correction to Energy=                | 0.390247                    |
| Thermal correction to Enthalpy=              | 0.391191                    |
| Thermal correction to Gibbs Free Energy=     | 0.314859                    |
| Sum of electronic and zero-point Energies=   | -2505.304542                |
| Sum of electronic and thermal Energies=      | -2505.282446                |
| Sum of electronic and thermal Enthalpies=    | -2505.281502                |
| Sum of electronic and thermal Free Energies= | -2505.357834                |

|    |          |          |          |
|----|----------|----------|----------|
| C  | -1.00887 | 0.76959  | 0.9193   |
| C  | 0.95985  | 1.84477  | 0.30467  |
| C  | 0.82981  | 2.78452  | 1.32068  |
| C  | -0.26802 | 2.68807  | 2.17709  |
| C  | -1.19467 | 1.67128  | 1.97328  |
| C  | -1.96964 | -0.29399 | 0.55778  |
| C  | -2.53694 | -1.84132 | -1.11276 |
| C  | -3.7095  | -2.17213 | -0.42601 |
| C  | -3.98906 | -1.57106 | 0.79729  |
| C  | -3.11558 | -0.60034 | 1.29042  |
| H  | 1.81113  | 1.86631  | -0.36859 |
| H  | 1.57289  | 3.56656  | 1.43479  |
| H  | -0.40504 | 3.399    | 2.98643  |
| H  | -2.06442 | 1.58931  | 2.61478  |
| H  | -2.31825 | -2.15008 | -2.16778 |
| H  | -4.39147 | -2.89228 | -0.86713 |
| H  | -4.88339 | -1.8311  | 1.35702  |
| H  | -3.33206 | -0.09382 | 2.22474  |
| N  | 0.07426  | 0.85393  | 0.10338  |
| N  | -1.67365 | -0.93729 | -0.60047 |
| Ni | 0.10196  | -0.52445 | -1.37993 |
| C  | 1.76253  | -0.7881  | -2.68121 |
| H  | 2.1678   | 0.22457  | -2.60622 |
| H  | 2.54856  | -1.49445 | -2.92374 |
| C  | 0.48766  | -0.97926 | -3.33515 |
| H  | 0.15873  | -1.97837 | -3.62657 |
| C  | -0.50762 | -0.0183  | -3.36826 |
| H  | -0.26549 | 1.05033  | -3.35161 |
| C  | -1.89165 | -0.45982 | -3.87015 |
| H  | -1.97828 | 0.01892  | -4.88624 |
| H  | -2.62351 | 0.1441   | -3.25491 |
| O  | -2.07463 | -1.7858  | -3.85737 |
| C  | 1.86433  | -1.64896 | -0.77148 |
| H  | 1.19413  | -1.61143 | 0.09645  |
| C  | 1.80404  | -3.01301 | -1.35586 |
| C  | 2.95914  | -3.67622 | -1.77105 |
| C  | 0.56286  | -3.64001 | -1.46345 |

```

C      2.87265 -4.96624 -2.29443
H      3.93765 -3.18188 -1.68573
C      0.47625 -4.93038 -1.98753
H     -0.34757 -3.11756 -1.13563
C      1.63106 -5.59319 -2.40303
H      3.78293 -5.48903 -2.62188
H     -0.50249 -5.42452 -2.07231
H      1.56313 -6.61015 -2.81612
H      2.85518 -1.38797 -0.46326

```

UM06/6-311+g(d,p)-SMD-water//UB3LYP/6-31G(d)-gas

HF=-2505.2824389

C-TSL-6

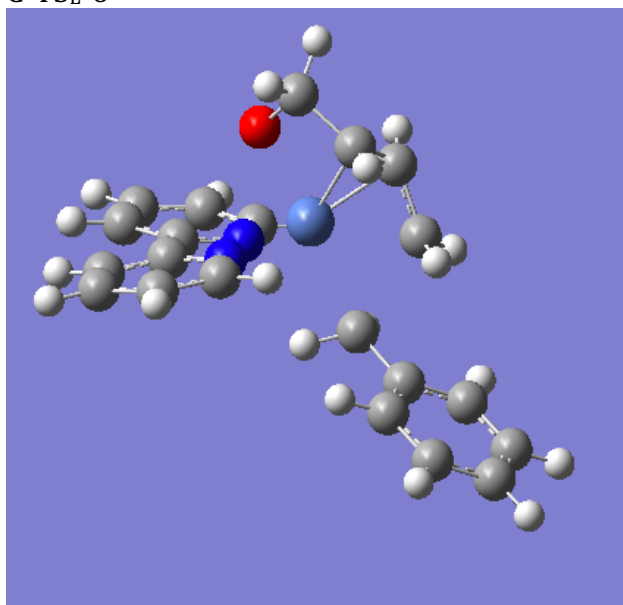

UB3LYP/6-31g(d)-gas

Imaginary frequency = -248.89 cm<sup>-1</sup>

Zero-point correction= 0.369766 (Hartree/Particle)

Thermal correction to Energy= 0.392117

Thermal correction to Enthalpy= 0.393062

Thermal correction to Gibbs Free Energy= 0.315549

Sum of electronic and zero-point Energies= -2505.317044

Sum of electronic and thermal Energies= -2505.294692

Sum of electronic and thermal Enthalpies= -2505.293748

Sum of electronic and thermal Free Energies= -2505.371260

```

C      -1.00887  0.76959  0.9193
C      0.95985  1.84477  0.30467
C      0.82981  2.78452  1.32068
C     -0.26802  2.68807  2.17709
C     -1.19467  1.67128  1.97328
C     -1.96964 -0.29399  0.55778
C     -2.53694 -1.84132 -1.11276
C     -3.7095  -2.17213 -0.42601

```

|    |          |          |          |
|----|----------|----------|----------|
| C  | -3.98906 | -1.57106 | 0.79729  |
| C  | -3.11558 | -0.60034 | 1.29042  |
| H  | 1.81113  | 1.86631  | -0.36859 |
| H  | 1.57289  | 3.56656  | 1.43479  |
| H  | -0.40504 | 3.399    | 2.98643  |
| H  | -2.06442 | 1.58931  | 2.61478  |
| H  | -2.31825 | -2.15008 | -2.16778 |
| H  | -4.39147 | -2.89228 | -0.86713 |
| H  | -4.88339 | -1.8311  | 1.35702  |
| H  | -3.33206 | -0.09382 | 2.22474  |
| N  | 0.07426  | 0.85393  | 0.10338  |
| N  | -1.67365 | -0.93729 | -0.60047 |
| Ni | 0.10196  | -0.52445 | -1.37993 |
| C  | 1.76253  | -0.7881  | -2.68121 |
| H  | 2.1678   | 0.22457  | -2.60622 |
| H  | 2.54856  | -1.49445 | -2.92374 |
| C  | 0.48766  | -0.97926 | -3.33515 |
| H  | 0.15873  | -1.97837 | -3.62657 |
| C  | -0.50762 | -0.0183  | -3.36826 |
| H  | -0.26549 | 1.05033  | -3.35161 |
| C  | -1.89165 | -0.45982 | -3.87015 |
| H  | -2.09789 | -1.4093  | -3.29999 |
| H  | -1.70575 | -0.84231 | -4.91801 |
| O  | -2.836   | 0.48156  | -3.7524  |
| C  | 1.86433  | -1.64896 | -0.77148 |
| H  | 1.19413  | -1.61143 | 0.09645  |
| C  | 3.23936  | -1.28678 | -0.34376 |
| C  | 3.46652  | -0.44167 | 0.75833  |
| C  | 4.37014  | -1.78998 | -1.01499 |
| C  | 4.75744  | -0.09606 | 1.15612  |
| H  | 2.61683  | -0.07286 | 1.32633  |
| C  | 5.66202  | -1.44752 | -0.62012 |
| H  | 4.23464  | -2.47645 | -1.84776 |
| C  | 5.86423  | -0.59166 | 0.46457  |
| H  | 4.89901  | 0.55307  | 2.01686  |
| H  | 6.51376  | -1.85812 | -1.15632 |
| H  | 6.87101  | -0.32607 | 0.775    |
| H  | 1.8084   | -2.65362 | -1.19011 |

UM06/6-311+g(d,p)-SMD-water//UB3LYP/6-31G(d)-gas  
HF=-2505.2655221  
C-TS<sub>L</sub>-7

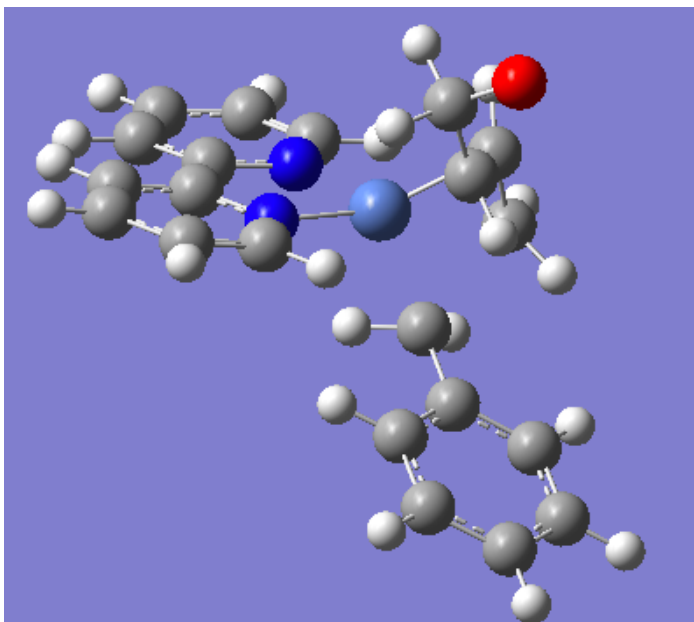

UB3LYP/6-31g(d)-gas

Imaginary frequency =  $-371.49 \text{ cm}^{-1}$

Zero-point correction= 0.367747 (Hartree/Particle)

Thermal correction to Energy= 0.390174

Thermal correction to Enthalpy= 0.391119

Thermal correction to Gibbs Free Energy= 0.313602

Sum of electronic and zero-point Energies= -2505.285876

Sum of electronic and thermal Energies= -2505.263449

Sum of electronic and thermal Enthalpies= -2505.262505

Sum of electronic and thermal Free Energies= -2505.340021

|   |          |          |          |
|---|----------|----------|----------|
| C | -1.89363 | 1.05288  | 1.33965  |
| C | -0.196   | 2.45558  | 0.52408  |
| C | -0.62332 | 3.51064  | 1.30635  |
| C | -1.73605 | 3.32661  | 2.14799  |
| C | -2.36411 | 2.09072  | 2.15737  |
| C | -2.49981 | -0.26644 | 1.25377  |
| C | -2.47448 | -2.31451 | 0.13252  |
| C | -3.51275 | -2.81705 | 0.89775  |
| C | -4.06366 | -1.99287 | 1.8953   |
| C | -3.55105 | -0.71997 | 2.07308  |
| H | 0.67039  | 2.55007  | -0.12049 |
| H | -0.09717 | 4.45867  | 1.26499  |
| H | -2.09973 | 4.13461  | 2.77489  |
| H | -3.23221 | 1.92961  | 2.78756  |
| H | -2.01402 | -2.91836 | -0.64525 |
| H | -3.88419 | -3.82111 | 0.72231  |
| H | -4.875   | -2.34974 | 2.52271  |
| H | -3.95206 | -0.07693 | 2.84896  |
| N | -0.79907 | 1.23812  | 0.51957  |

|    |          |          |          |
|----|----------|----------|----------|
| N  | -1.96966 | -1.07393 | 0.28046  |
| Ni | -0.40226 | -0.19977 | -0.68863 |
| C  | 0.49487  | -1.6282  | -1.99765 |
| H  | 1.55315  | -1.64242 | -2.25492 |
| H  | 0.04221  | -2.61364 | -2.09917 |
| C  | -0.27309 | -0.53825 | -2.58851 |
| H  | -1.24784 | -0.73439 | -3.03508 |
| C  | 0.18646  | 0.77301  | -2.39291 |
| H  | 1.2636   | 0.9431   | -2.32768 |
| C  | -0.60167 | 1.96295  | -2.9166  |
| O  | -0.1732  | 2.44522  | -4.10731 |
| H  | -0.53715 | 2.79136  | -2.16802 |
| H  | -1.69073 | 1.71467  | -2.92442 |
| C  | 1.10134  | -1.71964 | -0.04958 |
| H  | 0.49505  | -2.23583 | 0.69828  |
| C  | 1.98636  | -0.70022 | 0.57187  |
| C  | 1.60399  | -0.01396 | 1.73937  |
| C  | 3.23846  | -0.38936 | 0.01116  |
| C  | 2.43488  | 0.94293  | 2.3181   |
| H  | 0.64794  | -0.24609 | 2.20186  |
| C  | 4.06852  | 0.57418  | 0.58409  |
| H  | 3.57215  | -0.92388 | -0.87585 |
| C  | 3.66987  | 1.24768  | 1.73948  |
| H  | 2.1189   | 1.45179  | 3.22535  |
| H  | 5.03186  | 0.79288  | 0.13049  |
| H  | 4.31614  | 1.99697  | 2.18834  |
| H  | 1.67549  | -2.48816 | -0.56807 |

UM06/6-311+g(d,p)-SMD-water//UB3LYP/6-31G(d)-gas  
HF=-2505.2772145  
C-TS<sub>L</sub>-8

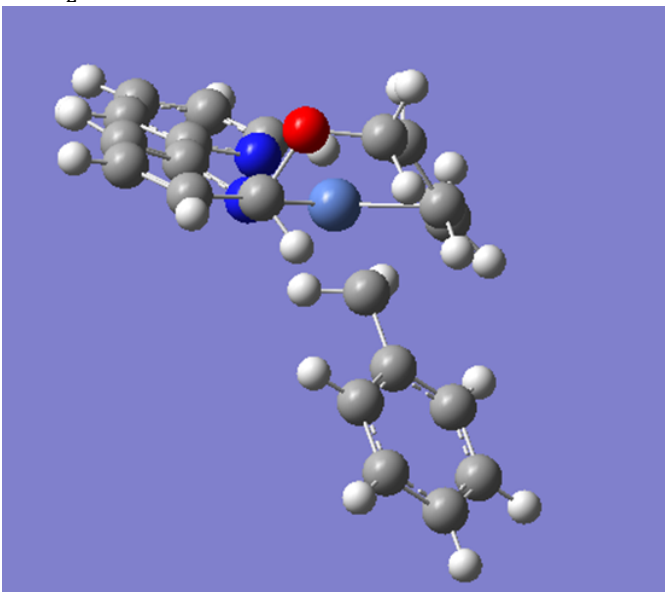



UB3LYP/6-31g(d)-gas

Imaginary frequency = -378.75 cm<sup>-1</sup>

Zero-point correction= 0.372723 (Hartree/Particle)

Thermal correction to Energy= 0.393717

Thermal correction to Enthalpy= 0.394661

Thermal correction to Gibbs Free Energy= 0.321651

Sum of electronic and zero-point Energies= -2505.324950

Sum of electronic and thermal Energies= -2505.303957

Sum of electronic and thermal Enthalpies= -2505.303013

Sum of electronic and thermal Free Energies= -2505.376023

|    |          |          |          |
|----|----------|----------|----------|
| C  | -1.80402 | 1.39559  | 1.05496  |
| C  | -0.50118 | 2.65698  | -0.49201 |
| C  | -0.76882 | 3.84795  | 0.3943   |
| C  | -1.71565 | 3.7753   | 1.36116  |
| C  | -2.34886 | 2.52549  | 1.63255  |
| C  | -2.35841 | 0.06283  | 1.30424  |
| C  | -2.31033 | -2.17308 | 0.65345  |
| C  | -3.31009 | -2.52949 | 1.54315  |
| C  | -3.83627 | -1.52844 | 2.36989  |
| C  | -3.35154 | -0.23644 | 2.25473  |
| H  | 0.58715  | 2.67109  | -0.6746  |
| H  | -0.26748 | 4.78129  | 0.15198  |
| H  | -1.98698 | 4.65338  | 1.94434  |
| H  | -3.18857 | 2.47352  | 2.31442  |
| H  | -1.86555 | -2.91885 | -0.00136 |
| H  | -3.65959 | -3.55535 | 1.59332  |
| H  | -4.60911 | -1.76043 | 3.09739  |
| H  | -3.72627 | 0.54686  | 2.9023   |
| N  | -0.71756 | 1.41189  | 0.2252   |
| N  | -1.84096 | -0.9161  | 0.51934  |
| Ni | -0.28455 | -0.28614 | -0.68162 |
| C  | 0.81573  | -1.51801 | -2.20464 |
| H  | 0.04735  | -2.12486 | -2.69117 |
| H  | 1.807    | -1.87351 | -2.49438 |
| C  | 0.66651  | -0.05611 | -2.41185 |
| H  | 1.5692   | 0.55345  | -2.37877 |
| C  | -0.55778 | 0.5595   | -2.63152 |
| H  | -1.39165 | -0.03611 | -3.00648 |
| C  | -0.63719 | 2.05961  | -2.8416  |
| O  | -1.2538  | 2.79415  | -1.79209 |
| C  | 1.02771  | -2.14921 | -0.55836 |
| H  | 0.23209  | -2.19537 | 0.18669  |
| C  | 2.32531  | -1.66914 | 0.02819  |
| C  | 2.38882  | -0.4735  | 0.76181  |
| C  | 3.50982  | -2.39251 | -0.17332 |
| C  | 3.60116  | -0.02244 | 1.28353  |

|   |          |          |          |
|---|----------|----------|----------|
| H | 1.48371  | 0.10996  | 0.91956  |
| C | 4.72429  | -1.93937 | 0.34261  |
| H | 3.47554  | -3.32652 | -0.73124 |
| C | 4.77344  | -0.75158 | 1.07409  |
| H | 3.62851  | 0.90229  | 1.85373  |
| H | 5.62968  | -2.51827 | 0.17971  |
| H | 5.71741  | -0.39839 | 1.48033  |
| H | 1.14703  | -3.16735 | -0.93913 |
| H | 0.3803   | 2.45106  | -2.99987 |
| H | -1.24552 | 2.28436  | -3.72295 |

UM06/6-311+g(d,p)-SMD-water//UB3LYP/6-31G(d)-gas  
HF=-2505.281191  
C-TS<sub>L</sub>

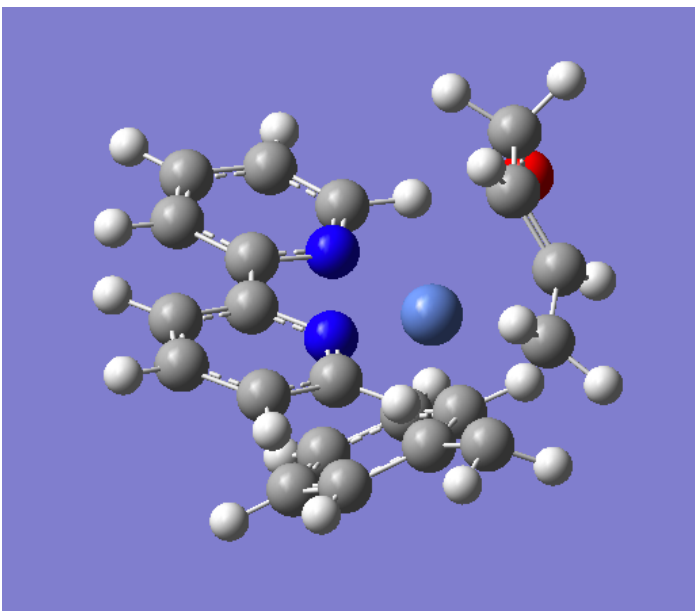

UB3LYP/6-31g(d)-gas  
Imaginary frequency = -293.16 cm<sup>-1</sup>  
Zero-point correction= 0.368710 (Hartree/Particle)  
Thermal correction to Energy= 0.390876  
Thermal correction to Enthalpy= 0.391820  
Thermal correction to Gibbs Free Energy= 0.316349  
Sum of electronic and zero-point Energies= -2505.302047  
Sum of electronic and thermal Energies= -2505.279881  
Sum of electronic and thermal Enthalpies= -2505.278937  
Sum of electronic and thermal Free Energies= -2505.354409

|   |          |         |         |
|---|----------|---------|---------|
| C | -1.5686  | 2.18377 | 1.56507 |
| C | 0.48993  | 3.16267 | 1.12464 |
| C | 0.24254  | 4.21694 | 1.99655 |
| C | -0.97821 | 4.24194 | 2.6723  |
| C | -1.89019 | 3.214   | 2.45568 |

|    |          |          |          |
|----|----------|----------|----------|
| C  | -2.45577 | 1.03657  | 1.26535  |
| C  | -2.79101 | -0.78066 | -0.17297 |
| C  | -3.99554 | -1.0848  | 0.46584  |
| C  | -4.4183  | -0.31677 | 1.5476   |
| C  | -3.64613 | 0.77361  | 1.9441   |
| H  | 1.42902  | 3.09501  | 0.58206  |
| H  | 0.98586  | 4.99473  | 2.13694  |
| H  | -1.21627 | 5.04881  | 3.35906  |
| H  | -2.84452 | 3.21489  | 2.96958  |
| H  | -2.42244 | -1.27389 | -1.11724 |
| H  | -4.59119 | -1.91573 | 0.10044  |
| H  | -5.34461 | -0.54507 | 2.06815  |
| H  | -3.9669  | 1.39915  | 2.76996  |
| N  | -0.38662 | 2.17274  | 0.90088  |
| N  | -2.02951 | 0.24881  | 0.25039  |
| Ni | -0.19004 | 0.6344   | -0.41963 |
| C  | 1.59975  | 0.86222  | -1.53699 |
| H  | 1.61552  | 1.9527   | -1.44818 |
| H  | 2.60094  | 0.49015  | -1.74143 |
| C  | 0.50411  | 0.2676   | -2.30966 |
| H  | 0.54351  | -0.80218 | -2.52213 |
| C  | -0.71548 | 0.86697  | -2.56437 |
| H  | -0.81131 | 1.95671  | -2.60589 |
| C  | -1.84257 | -0.02524 | -3.10219 |
| H  | -1.89372 | 0.22259  | -4.20024 |
| C  | 1.80391  | -0.08757 | 0.1788   |
| H  | 2.69434  | 0.47818  | 0.45657  |
| H  | -2.79166 | 0.44454  | -2.70441 |
| O  | -1.66998 | -1.32226 | -2.81474 |
| C  | 1.04653  | -0.51513 | 1.40651  |
| C  | 1.2531   | 0.0947   | 2.65814  |
| C  | 0.19528  | -1.64314 | 1.35905  |
| C  | 0.60039  | -0.36669 | 3.79975  |
| H  | 1.93922  | 0.93537  | 2.73278  |
| C  | -0.46137 | -2.09845 | 2.49761  |
| H  | 0.04266  | -2.15173 | 0.40924  |
| C  | -0.2679  | -1.45926 | 3.7263   |
| H  | 0.78171  | 0.12025  | 4.75502  |
| H  | -1.11869 | -2.9614  | 2.42837  |
| H  | -0.77126 | -1.82063 | 4.61886  |
| H  | 2.0981   | -0.97851 | -0.37641 |

UM06/6-311+g(d,p)-SMD-water//UB3LYP/6-31G(d)-gas  
HF=-2505.287780  
UB3LYP-D3/6-311+g(d,p)-SMD-water//UB3LYP/6-31G(d)-gas  
HF = -2506.1928851  
DLPNO-CCSD(T)/def2-TZVPP//uB3LYP/6-31G(d)-gas

HF = -2503.284994203000

$\Delta G_{\text{solv}} = -0.0445728$

C-TS<sub>B</sub>-1

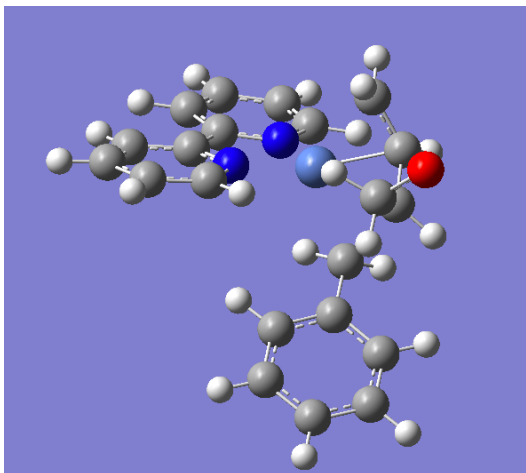

UB3LYP/6-31g(d)-gas

Imaginary frequency =  $-385.66 \text{ cm}^{-1}$

Zero-point correction= 0.368199 (Hartree/Particle)

Thermal correction to Energy= 0.390811

Thermal correction to Enthalpy= 0.391755

Thermal correction to Gibbs Free Energy= 0.314247

Sum of electronic and zero-point Energies= -2505.289391

Sum of electronic and thermal Energies= -2505.266778

Sum of electronic and thermal Enthalpies= -2505.265834

Sum of electronic and thermal Free Energies= -2505.343342

|   |          |          |          |
|---|----------|----------|----------|
| C | -1.00887 | 0.76959  | 0.9193   |
| C | 0.95985  | 1.84477  | 0.30467  |
| C | 0.82981  | 2.78452  | 1.32068  |
| C | -0.26802 | 2.68807  | 2.17709  |
| C | -1.19467 | 1.67128  | 1.97328  |
| C | -1.96964 | -0.29399 | 0.55778  |
| C | -2.53694 | -1.84132 | -1.11276 |
| C | -3.7095  | -2.17213 | -0.42601 |
| C | -3.98906 | -1.57106 | 0.79729  |
| C | -3.11558 | -0.60034 | 1.29042  |
| H | 1.81113  | 1.86631  | -0.36859 |
| H | 1.57289  | 3.56656  | 1.43479  |
| H | -0.40504 | 3.399    | 2.98643  |
| H | -2.06442 | 1.58931  | 2.61478  |
| H | -2.31825 | -2.15008 | -2.16778 |
| H | -4.39147 | -2.89228 | -0.86713 |
| H | -4.88339 | -1.8311  | 1.35702  |

|    |          |          |          |
|----|----------|----------|----------|
| H  | -3.33206 | -0.09382 | 2.22474  |
| N  | 0.07426  | 0.85393  | 0.10338  |
| N  | -1.67365 | -0.93729 | -0.60047 |
| Ni | 0.10196  | -0.52445 | -1.37993 |
| C  | 1.76253  | -0.7881  | -2.68121 |
| H  | 2.54856  | -1.49445 | -2.92374 |
| C  | 0.48766  | -0.97926 | -3.33515 |
| H  | 0.15873  | -1.97837 | -3.62657 |
| C  | -0.50762 | -0.0183  | -3.36826 |
| H  | -0.26549 | 1.05033  | -3.35161 |
| C  | 1.86433  | -1.64896 | -0.77148 |
| H  | 1.19413  | -1.61143 | 0.09645  |
| C  | 3.23936  | -1.28678 | -0.34376 |
| C  | 3.46652  | -0.44167 | 0.75833  |
| C  | 4.37014  | -1.78998 | -1.01499 |
| C  | 4.75744  | -0.09606 | 1.15612  |
| H  | 2.61683  | -0.07286 | 1.32633  |
| C  | 5.66202  | -1.44752 | -0.62012 |
| H  | 4.23464  | -2.47645 | -1.84776 |
| C  | 5.86423  | -0.59166 | 0.46457  |
| H  | 4.89901  | 0.55307  | 2.01686  |
| H  | 6.51376  | -1.85812 | -1.15632 |
| H  | 6.87101  | -0.32607 | 0.775    |
| H  | 1.8084   | -2.65362 | -1.19011 |
| C  | 2.33337  | 0.63829  | -2.57558 |
| H  | 1.7578   | 1.20153  | -1.87103 |
| H  | 3.35115  | 0.59185  | -2.24867 |
| O  | 2.27244  | 1.27213  | -3.85598 |
| H  | -1.47113 | -0.32567 | -3.71766 |

UM06/6-311+g(d,p)-SMD-water//UB3LYP/6-31G(d)-gas  
HF=-2505.2814078  
C-TS<sub>B</sub>-2

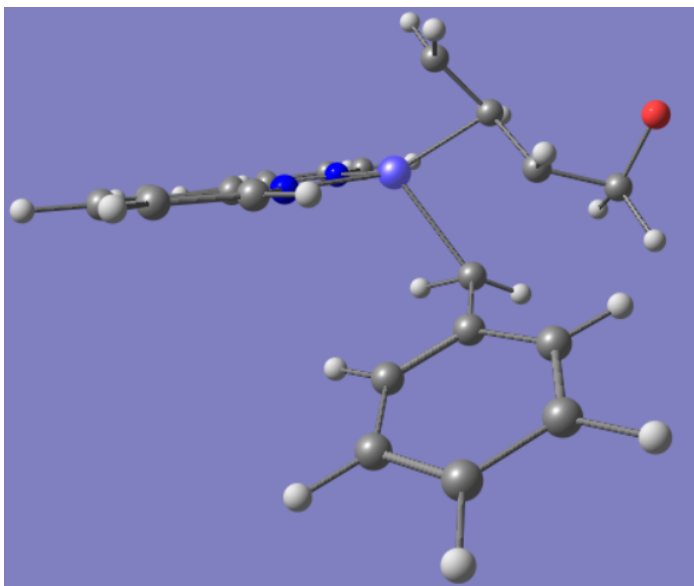

UB3LYP/6-31g(d)-gas

Imaginary frequency = -486.76 cm<sup>-1</sup>

Zero-point correction= 0.367873 (Hartree/Particle)

Thermal correction to Energy= 0.390488

Thermal correction to Enthalpy= 0.391432

Thermal correction to Gibbs Free Energy= 0.313474

Sum of electronic and zero-point Energies= -2505.289900

Sum of electronic and thermal Energies= -2505.267284

Sum of electronic and thermal Enthalpies= -2505.266340

Sum of electronic and thermal Free Energies= -2505.344298

|   |          |          |          |
|---|----------|----------|----------|
| C | -2.05201 | 1.2627   | 1.01432  |
| C | 0.12903  | 1.84547  | 1.58725  |
| C | -0.30184 | 2.57254  | 2.6896   |
| C | -1.67084 | 2.63119  | 2.96109  |
| C | -2.55195 | 1.96683  | 2.11523  |
| C | -2.8959  | 0.5622   | 0.02994  |
| C | -2.89613 | -0.63169 | -1.97151 |
| C | -4.27758 | -0.77177 | -1.94982 |
| C | -4.98735 | -0.21479 | -0.88207 |
| C | -4.28983 | 0.45778  | 0.11419  |
| H | 1.18438  | 1.75227  | 1.35519  |
| H | 0.42339  | 3.07428  | 3.32126  |
| H | -2.04524 | 3.18557  | 3.81619  |
| H | -3.61853 | 2.00386  | 2.30588  |
| H | -2.29974 | -1.04307 | -2.78015 |
| H | -4.78123 | -1.30354 | -2.7499  |
| H | -6.06803 | -0.30416 | -0.82766 |
| H | -4.82429 | 0.89516  | 0.94971  |
| N | -0.71539 | 1.20263  | 0.75831  |
| N | -2.21232 | 0.01442  | -1.01088 |

|    |          |          |          |
|----|----------|----------|----------|
| Ni | -0.23167 | 0.25064  | -0.91324 |
| C  | 1.68574  | -0.5193  | -2.121   |
| C  | 0.56718  | 0.19892  | -2.73684 |
| H  | -0.00079 | -0.35406 | -3.4839  |
| C  | 0.25061  | 1.52411  | -2.44288 |
| H  | 1.01213  | 2.19167  | -2.04043 |
| C  | 1.04762  | -1.47011 | -0.40421 |
| H  | 0.02428  | -1.60205 | -0.00379 |
| C  | 2.00969  | -1.28016 | 0.71609  |
| C  | 1.56448  | -1.05017 | 2.03315  |
| C  | 3.40181  | -1.34855 | 0.50802  |
| C  | 2.46069  | -0.89216 | 3.09013  |
| H  | 0.49524  | -1.02179 | 2.23262  |
| C  | 4.29826  | -1.18851 | 1.56364  |
| H  | 3.77945  | -1.54609 | -0.49101 |
| C  | 3.83654  | -0.95537 | 2.86126  |
| H  | 2.08139  | -0.72964 | 4.09655  |
| H  | 5.36625  | -1.25173 | 1.36995  |
| H  | 4.53797  | -0.83391 | 3.68237  |
| H  | 1.23737  | -2.38701 | -0.96312 |
| H  | -0.55726 | 2.01776  | -2.97733 |
| H  | 2.45055  | 0.11705  | -1.67329 |
| C  | 2.26818  | -1.6098  | -3.02398 |
| H  | 3.0339   | -2.20599 | -2.45764 |
| H  | 1.43535  | -2.34927 | -3.23601 |
| O  | 2.69643  | -0.86235 | -4.03127 |

UM06/6-311+g(d,p)-SMD-water//UB3LYP/6-31G(d)-gas  
HF = -2505.2812 cm<sup>-1</sup>

C-TS<sub>B</sub>-3

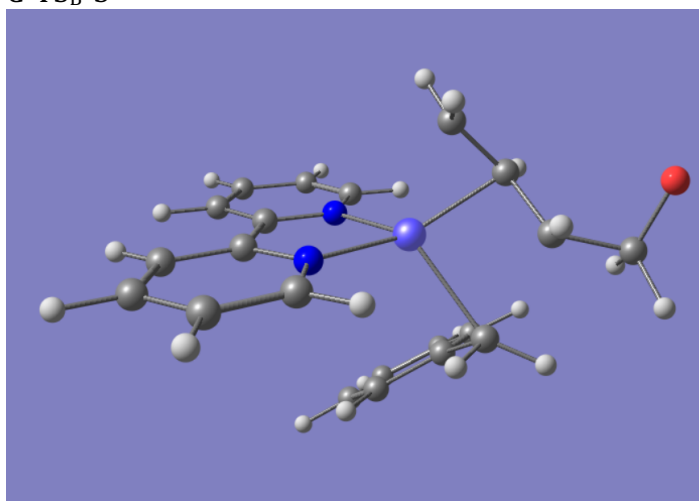

UB3LYP/6-31g(d)-gas  
Imaginary frequency = -444.04 cm<sup>-1</sup>

|                                              |          |          |                             |
|----------------------------------------------|----------|----------|-----------------------------|
| Zero-point correction=                       |          |          | 0.367858 (Hartree/Particle) |
| Thermal correction to Energy=                |          |          | 0.390523                    |
| Thermal correction to Enthalpy=              |          |          | 0.391467                    |
| Thermal correction to Gibbs Free Energy=     |          |          | 0.313912                    |
| Sum of electronic and zero-point Energies=   |          |          | -2505.290812                |
| Sum of electronic and thermal Energies=      |          |          | -2505.268147                |
| Sum of electronic and thermal Enthalpies=    |          |          | -2505.267203                |
| Sum of electronic and thermal Free Energies= |          |          | -2505.344757                |
| C                                            | -1.80262 | 1.15196  | 1.48108                     |
| C                                            | 0.24825  | 2.16667  | 1.047                       |
| C                                            | 0.07471  | 3.07472  | 2.08389                     |
| C                                            | -1.08954 | 3.00123  | 2.85224                     |
| C                                            | -2.03429 | 2.02761  | 2.54747                     |
| C                                            | -2.75312 | 0.11388  | 1.04501                     |
| C                                            | -3.18037 | -1.52622 | -0.55407                    |
| C                                            | -4.39705 | -1.85446 | 0.02948                     |
| C                                            | -4.79559 | -1.15932 | 1.17502                     |
| C                                            | -3.96665 | -0.16738 | 1.68503                     |
| H                                            | 1.14851  | 2.17281  | 0.44246                     |
| H                                            | 0.84044  | 3.81646  | 2.2843                      |
| H                                            | -1.25867 | 3.69054  | 3.6738                      |
| H                                            | -2.94672 | 1.95574  | 3.12837                     |
| H                                            | -2.82679 | -2.03452 | -1.4459                     |
| H                                            | -5.01368 | -2.6344  | -0.40415                    |
| H                                            | -5.73839 | -1.38801 | 1.66251                     |
| H                                            | -4.26059 | 0.38102  | 2.57283                     |
| N                                            | -0.66248 | 1.2239   | 0.73891                     |
| N                                            | -2.37001 | -0.57095 | -0.06606                    |
| Ni                                           | -0.58797 | -0.03076 | -0.79573                    |
| C                                            | 0.93249  | -0.76107 | -2.49107                    |
| C                                            | -0.47474 | -0.43678 | -2.73965                    |
| H                                            | -1.09968 | -1.25757 | -3.08959                    |
| C                                            | -1.00215 | 0.84574  | -2.59602                    |
| H                                            | -0.35081 | 1.71676  | -2.66284                    |
| C                                            | 1.15868  | -1.34658 | -0.52829                    |
| H                                            | 1.86423  | -1.426   | -1.37858                    |
| C                                            | 0.64901  | -2.69841 | -0.16556                    |
| C                                            | 0.88441  | -3.81836 | -0.98711                    |
| C                                            | -0.06787 | -2.91267 | 1.02875                     |
| C                                            | 0.4254   | -5.08889 | -0.63863                    |
| H                                            | 1.46054  | -3.69278 | -1.90153                    |
| C                                            | -0.52927 | -4.18121 | 1.37629                     |
| H                                            | -0.24747 | -2.0747  | 1.6961                      |
| C                                            | -0.29039 | -5.27823 | 0.54479                     |
| H                                            | 0.63711  | -5.93399 | -1.2899                     |
| H                                            | -1.0753  | -4.31341 | 2.30714                     |



|   |          |          |          |
|---|----------|----------|----------|
| H | -0.64892 | -6.26657 | 0.81984  |
| H | 1.75749  | -0.90303 | 0.26789  |
| H | -2.04246 | 1.03039  | -2.85257 |
| H | 1.60819  | 0.09549  | -2.48591 |
| C | 1.4491   | -1.91931 | -3.3487  |
| H | 2.48555  | -2.20327 | -3.01931 |
| H | 0.81515  | -2.82602 | -3.10374 |
| O | 1.31453  | -1.38447 | -4.55408 |

UM06/6-311+g(d,p)-SMD-water//UB3LYP/6-31G(d)-gas  
HF = -2505.270998  
C-TS<sub>B</sub>-4

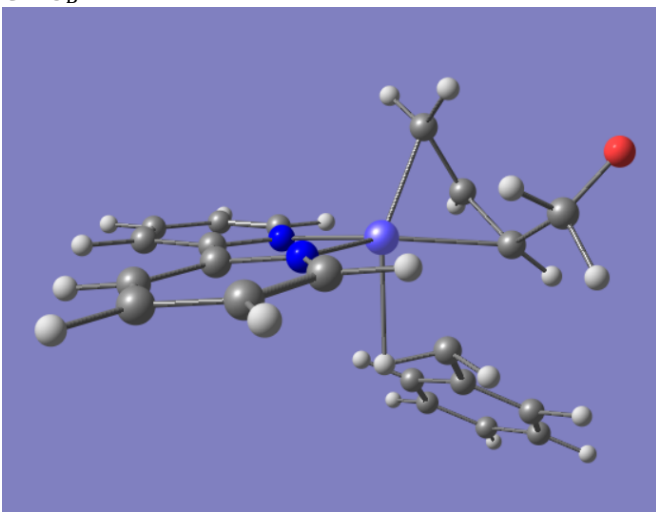

UB3LYP/6-31g(d)-gas  
Imaginary frequency = -327.692 cm<sup>-1</sup>  
Zero-point correction= 0.367979 (Hartree/Particle)  
Thermal correction to Energy= 0.390539  
Thermal correction to Enthalpy= 0.391484  
Thermal correction to Gibbs Free Energy= 0.314033  
Sum of electronic and zero-point Energies= -2505.293742  
Sum of electronic and thermal Energies= -2505.271182  
Sum of electronic and thermal Enthalpies= -2505.270238  
Sum of electronic and thermal Free Energies= -2505.347689

|   |          |          |         |
|---|----------|----------|---------|
| C | -1.8928  | 1.10853  | 1.38535 |
| C | 0.00439  | 2.32527  | 0.79091 |
| C | -0.16019 | 3.19905  | 1.85603 |
| C | -1.2387  | 3.00344  | 2.72622 |
| C | -2.10858 | 1.94809  | 2.48632 |
| C | -2.7653  | -0.01762 | 1.02582 |
| C | -3.07434 | -1.79771 | -0.4453 |
| C | -4.25948 | -2.17443 | 0.17019 |
| C | -4.71271 | -1.42119 | 1.25977 |
| C | -3.96036 | -0.33569 | 1.6869  |
| H | 0.82765  | 2.43483  | 0.09181 |

|    |          |          |          |
|----|----------|----------|----------|
| H  | 0.54307  | 4.0126   | 1.99898  |
| H  | -1.39503 | 3.66122  | 3.57575  |
| H  | -2.94692 | 1.77356  | 3.15124  |
| H  | -2.68611 | -2.34475 | -1.29945 |
| H  | -4.81343 | -3.0323  | -0.19584 |
| H  | -5.63982 | -1.67705 | 1.76367  |
| H  | -4.30191 | 0.26522  | 2.52219  |
| N  | -0.83538 | 1.29944  | 0.5443   |
| N  | -2.33445 | -0.75082 | -0.03834 |
| Ni | -0.68394 | -0.03203 | -0.92368 |
| C  | 0.94339  | -0.44871 | -2.34082 |
| H  | 1.64738  | -1.18959 | -2.70708 |
| C  | -0.44759 | -0.63321 | -2.78057 |
| H  | -0.78234 | -1.64267 | -3.02428 |
| C  | -1.33518 | 0.44143  | -2.8217  |
| H  | -0.96073 | 1.44065  | -3.02578 |
| C  | 1.0059   | -1.38599 | -0.48709 |
| H  | 1.01722  | -0.45188 | 0.09117  |
| C  | 2.31794  | -2.06283 | -0.35221 |
| C  | 3.50485  | -1.33272 | -0.15603 |
| C  | 2.41892  | -3.46569 | -0.39621 |
| C  | 4.73561  | -1.97253 | -0.02132 |
| H  | 3.45701  | -0.24778 | -0.09535 |
| C  | 3.64796  | -4.10807 | -0.26279 |
| H  | 1.51772  | -4.05906 | -0.53414 |
| C  | 4.81626  | -3.3655  | -0.0776  |
| H  | 5.63489  | -1.38102 | 0.13375  |
| H  | 3.69298  | -5.19356 | -0.30122 |
| H  | 5.77509  | -3.86583 | 0.02693  |
| H  | 0.1812   | -1.98696 | -0.10377 |
| C  | 1.59107  | 0.95986  | -2.46019 |
| H  | 0.97777  | 1.71654  | -1.88721 |
| H  | 2.56435  | 0.91397  | -1.92004 |
| O  | 1.63455  | 1.12188  | -3.77615 |
| H  | -2.36629 | 0.2564   | -3.1127  |

UM06/6-311+g(d,p)-SMD-water//UB3LYP/6-31G(d)-gas  
HF = -2505.273915

C-TS<sub>B</sub>-5

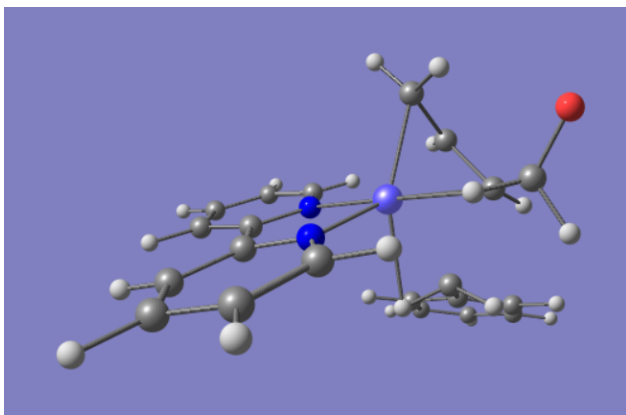

UB3LYP/6-31g(d)-gas

Imaginary frequency = -343.95 cm<sup>-1</sup>

Zero-point correction= 0.367045 (Hartree/Particle)

Thermal correction to Energy= 0.389313

Thermal correction to Enthalpy= 0.390257

Thermal correction to Gibbs Free Energy= 0.313588

Sum of electronic and zero-point Energies= -2505.294430

Sum of electronic and thermal Energies= -2505.272162

Sum of electronic and thermal Enthalpies= -2505.271218

Sum of electronic and thermal Free Energies= -2505.347887

|    |          |          |          |
|----|----------|----------|----------|
| C  | -1.11231 | 1.98772  | 1.96309  |
| C  | 0.82866  | 3.14897  | 1.39528  |
| C  | 0.72374  | 3.95527  | 2.52379  |
| C  | -0.34078 | 3.75117  | 3.4052   |
| C  | -1.26974 | 2.75431  | 3.12378  |
| C  | -2.03918 | 0.9216   | 1.53266  |
| C  | -2.4228  | -0.77706 | 0.00359  |
| C  | -3.65558 | -1.0861  | 0.56743  |
| C  | -4.08931 | -0.34001 | 1.66453  |
| C  | -3.2718  | 0.6733   | 2.15058  |
| H  | 1.62705  | 3.22425  | 0.66095  |
| H  | 1.46683  | 4.72439  | 2.70835  |
| H  | -0.44429 | 4.35639  | 4.3012   |
| H  | -2.09557 | 2.57063  | 3.80216  |
| H  | -2.04458 | -1.33721 | -0.84495 |
| H  | -4.25532 | -1.89067 | 0.15474  |
| H  | -5.04923 | -0.54164 | 2.13084  |
| H  | -3.59395 | 1.27555  | 2.99253  |
| N  | -0.07209 | 2.18724  | 1.12231  |
| N  | -1.62313 | 0.19946  | 0.46147  |
| Ni | 0.13045  | 0.98614  | -0.46614 |
| C  | 1.32849  | -0.0145  | -2.01822 |
| H  | 1.73593  | -0.97749 | -2.31842 |
| C  | -0.0647  | 0.1966   | -2.34574 |
| H  | -0.67389 | -0.70203 | -2.44483 |

|   |          |          |          |
|---|----------|----------|----------|
| C | -0.70592 | 1.43943  | -2.34939 |
| H | -0.16462 | 2.35985  | -2.53549 |
| C | 1.73289  | -0.58905 | -0.21064 |
| H | 2.76903  | -0.28156 | -0.3236  |
| C | 1.53273  | -2.05284 | -0.24736 |
| C | 2.40357  | -2.89352 | -0.9713  |
| C | 0.47474  | -2.6729  | 0.44639  |
| C | 2.21771  | -4.27391 | -1.01254 |
| H | 3.25158  | -2.45335 | -1.49172 |
| C | 0.28486  | -4.05354 | 0.40575  |
| H | -0.19411 | -2.05797 | 1.04226  |
| C | 1.15223  | -4.86463 | -0.32897 |
| H | 2.91306  | -4.89252 | -1.57496 |
| H | -0.53873 | -4.49908 | 0.95929  |
| H | 1.00753  | -5.94124 | -0.3592  |
| H | 1.35935  | -0.17655 | 0.73038  |
| C | 2.23278  | 1.21164  | -2.00619 |
| H | -1.77445 | 1.4587   | -2.55297 |
| H | 1.67178  | 2.06544  | -1.68806 |
| O | 2.71136  | 1.4258   | -3.23935 |
| H | 3.0467   | 1.04793  | -1.33118 |

UM06/6-311+g(d,p)-SMD-water//UB3LYP/6-31G(d)-gas  
HF = -2505.2764

C-TS<sub>B</sub>

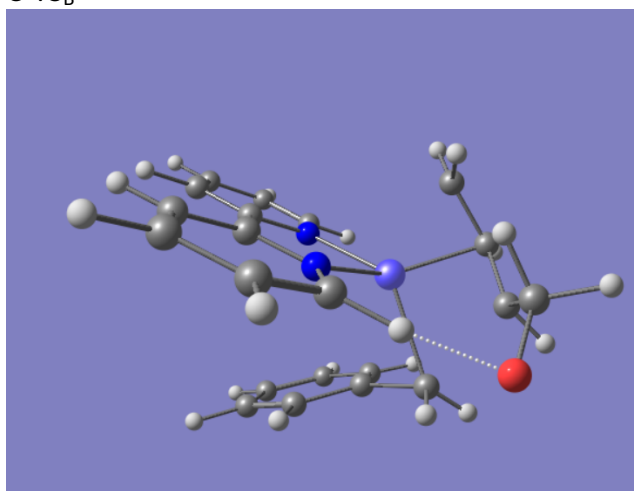

UB3LYP/6-31g(d)-gas  
Imaginary frequency = -229.10 cm<sup>-1</sup>  
Zero-point correction= 0.369235 (Hartree/Particle)  
Thermal correction to Energy= 0.391133  
Thermal correction to Enthalpy= 0.392077  
Thermal correction to Gibbs Free Energy= 0.317630  
Sum of electronic and zero-point Energies= -2505.303251  
Sum of electronic and thermal Energies= -2505.281353

|                                              |                            |
|----------------------------------------------|----------------------------|
| Sum of electronic and thermal Enthalpies=    | -2505.280409               |
| Sum of electronic and thermal Free Energies= | -2505.354856               |
| C                                            | -2.42248 1.29717 1.28299   |
| C                                            | -0.74205 2.83838 0.79219   |
| C                                            | -1.17536 3.6922 1.80077    |
| C                                            | -2.27472 3.31918 2.57813   |
| C                                            | -2.90506 2.10663 2.31821   |
| C                                            | -3.0098 -0.00289 0.89711   |
| C                                            | -2.82347 -1.84296 -0.50009 |
| C                                            | -3.94979 -2.44874 0.04583  |
| C                                            | -4.63322 -1.77807 1.06156  |
| C                                            | -4.15819 -0.54446 1.49058  |
| H                                            | 0.10881 3.04021 0.14631    |
| H                                            | -0.65703 4.62993 1.9733    |
| H                                            | -2.63439 3.96122 3.37697   |
| H                                            | -3.75519 1.79629 2.91556   |
| H                                            | -2.26142 -2.32612 -1.29386 |
| H                                            | -4.27943 -3.41649 -0.31768 |
| H                                            | -5.52195 -2.20962 1.51267  |
| H                                            | -4.67711 -0.00622 2.27559  |
| N                                            | -1.35508 1.66711 0.53837   |
| N                                            | -2.35576 -0.65286 -0.09711 |
| Ni                                           | -0.73209 0.46974 -0.93473  |
| C                                            | 0.71124 -0.36628 -2.34619  |
| H                                            | 1.27783 -1.26669 -2.57809  |
| C                                            | -0.6519 -0.32698 -2.82883  |
| H                                            | -1.13914 -1.29055 -2.98511 |
| C                                            | -1.4373 0.82503 -2.91038   |
| H                                            | -0.99629 1.80771 -3.0314   |
| C                                            | 0.73307 -1.07707 -0.27135  |
| H                                            | 1.36769 -1.87508 -0.66447  |
| C                                            | 0.42133 -1.3514 1.14457    |
| C                                            | 0.10659 -2.65276 1.58219   |
| C                                            | 0.43527 -0.32517 2.10671   |
| C                                            | -0.16649 -2.91424 2.922    |
| H                                            | 0.04502 -3.44979 0.84642   |
| C                                            | 0.16198 -0.5857 3.44963    |
| H                                            | 0.6829 0.68852 1.7965      |
| C                                            | -0.13812 -1.88326 3.8663   |
| H                                            | -0.40826 -3.92806 3.23236  |
| H                                            | 0.18908 0.22686 4.17196    |
| H                                            | -0.34954 -2.08982 4.91221  |
| H                                            | 1.24062 -0.12182 -0.41524  |
| C                                            | 1.45577 0.95783 -2.23765   |
| H                                            | -2.47208 0.71387 -3.22633  |
| H                                            | 1.51421 1.41437 -3.2036    |

O 2.69285 0.73781 -1.77201  
 H 0.9326 1.60728 -1.56727  
 UM06/6-311+g(d,p)-SMD-water//UB3LYP/6-31G(d)-gas  
 HF=-2505.2794819  
 UB3LYP-D3/6-311+g(d,p)-SMD-water//UB3LYP/6-31G(d)-gas  
 HF = -2506.1862011  
 DLPNO-CCSD(T)/def2-TZVPP//uB3LYP/6-31G(d)-gas  
 HF = -2503.286377222440  
 $\Delta G_{\text{solv}} = -0.0366925$

B''-TS<sub>L</sub>

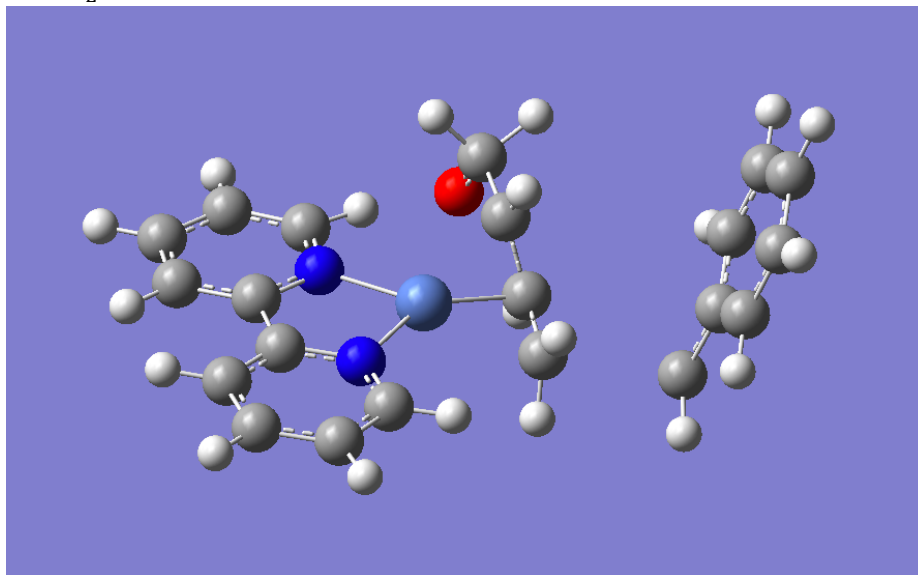

UB3LYP/6-31g(d)-gas  
 Imaginary frequency = -636.59 cm<sup>-1</sup>  
 Zero-point correction= 0.365804 (Hartree/Particle)  
 Thermal correction to Energy= 0.388564  
 Thermal correction to Enthalpy= 0.389508  
 Thermal correction to Gibbs Free Energy= 0.310314  
 Sum of electronic and zero-point Energies= -2505.299320  
 Sum of electronic and thermal Energies= -2505.276559  
 Sum of electronic and thermal Enthalpies= -2505.275615  
 Sum of electronic and thermal Free Energies= -2505.354809  
 C -0.92081 0.98226 2.85884  
 C 0.67014 2.31217 1.794  
 C 0.47953 3.35274 2.69422  
 C -0.45476 3.1855 3.71796  
 C -1.15798 1.98782 3.79956  
 C -1.5887 -0.3339 2.85009  
 C -1.72129 -2.37911 1.70945  
 C -2.60446 -2.87359 2.6738

|    |          |          |          |
|----|----------|----------|----------|
| C  | -2.98004 | -2.07177 | 3.74791  |
| C  | -2.46364 | -0.77945 | 3.84019  |
| H  | 1.38905  | 2.39112  | 0.98607  |
| H  | 1.05273  | 4.26801  | 2.59223  |
| H  | -0.63389 | 3.97557  | 4.44093  |
| H  | -1.89076 | 1.83878  | 4.58437  |
| H  | -1.33493 | -2.98137 | 0.84436  |
| H  | -2.98485 | -3.8845  | 2.56672  |
| H  | -3.65853 | -2.44172 | 4.51178  |
| H  | -2.72919 | -0.1412  | 4.6758   |
| N  | -0.00759 | 1.15114  | 1.86035  |
| N  | -1.23443 | -1.12306 | 1.80007  |
| Ni | 0.04227  | -0.29963 | 0.59114  |
| C  | 1.83921  | -0.03604 | -0.58031 |
| H  | 1.571    | 0.90726  | -1.04641 |
| H  | 2.68603  | -0.02865 | 0.09911  |
| C  | 1.08032  | -1.2273  | -0.79853 |
| H  | 1.43511  | -2.2025  | -0.46333 |
| C  | -0.23453 | -1.18673 | -1.25843 |
| H  | -0.58624 | -0.31939 | -1.83027 |
| C  | -1.03659 | -2.48073 | -1.36483 |
| H  | -1.07585 | -2.68547 | -2.47363 |
| C  | 3.20106  | -0.11228 | -2.04303 |
| H  | 3.36256  | -1.17159 | -1.87679 |
| H  | -2.10453 | -2.16932 | -1.14588 |
| O  | -0.57116 | -3.48718 | -0.62193 |
| C  | 2.52945  | 0.31832  | -3.23213 |
| C  | 1.74914  | -0.58196 | -4.00078 |
| C  | 2.58448  | 1.66945  | -3.65929 |
| C  | 1.06791  | -0.15095 | -5.13345 |
| H  | 1.68558  | -1.62149 | -3.69098 |
| C  | 1.90408  | 2.09253  | -4.79435 |
| H  | 3.18104  | 2.37834  | -3.08843 |
| C  | 1.1401   | 1.18622  | -5.5396  |
| H  | 0.47627  | -0.86082 | -5.70572 |
| H  | 1.96966  | 3.13213  | -5.10621 |
| H  | 0.60908  | 1.51847  | -6.4274  |
| H  | 3.91701  | 0.55573  | -1.57185 |

UM06/6-311+g(d,p)-SMD-water//UB3LYP/6-31G(d)-gas  
HF=-2505.2737072  
UB3LYP-D3/6-311+g(d,p)-SMD-water//UB3LYP/6-31G(d)-gas  
HF=-2506.1837374  
DLPNO-CCSD(T)/def2-TZVPP//uB3LYP/6-31G(d)-gas  
HF = -2503.267387295916  
 $\Delta G_{\text{solv}} = -0.0452782$

B''-TSL-2

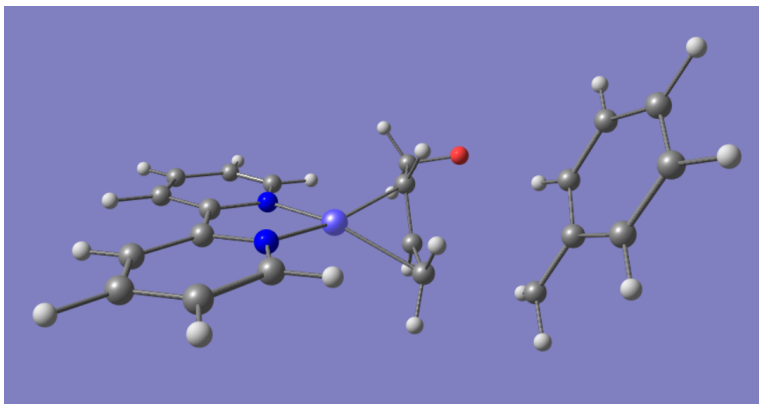

UB3LYP/6-31g(d)-gas

Imaginary frequency =  $-587.27 \text{ cm}^{-1}$

Zero-point correction= 0.366803 (Hartree/Particle)

Thermal correction to Energy= 0.389962

Thermal correction to Enthalpy= 0.390906

Thermal correction to Gibbs Free Energy= 0.310188

Sum of electronic and zero-point Energies= -2505.285504

Sum of electronic and thermal Energies= -2505.262346

Sum of electronic and thermal Enthalpies= -2505.261402

Sum of electronic and thermal Free Energies= -2505.342119

|    |          |          |          |
|----|----------|----------|----------|
| C  | -1.13555 | 0.9784   | 3.13108  |
| C  | 0.43215  | 2.32358  | 2.05098  |
| C  | 0.24767  | 3.35842  | 2.95902  |
| C  | -0.67091 | 3.18005  | 3.99505  |
| C  | -1.36553 | 1.97763  | 4.08032  |
| C  | -1.79637 | -0.34133 | 3.12417  |
| C  | -1.93433 | -2.38063 | 1.97353  |
| C  | -2.8029  | -2.88466 | 2.94612  |
| C  | -3.16789 | -2.09087 | 4.02985  |
| C  | -2.65622 | -0.79674 | 4.12298  |
| H  | 1.1391   | 2.41115  | 1.23344  |
| H  | 0.81351  | 4.27787  | 2.85356  |
| H  | -0.84463 | 3.96527  | 4.7246   |
| H  | -2.08618 | 1.82002  | 4.87463  |
| H  | -1.55618 | -2.97619 | 1.10031  |
| H  | -3.1803  | -3.89657 | 2.83793  |
| H  | -3.8346  | -2.4684  | 4.80035  |
| H  | -2.91389 | -0.16456 | 4.96565  |
| N  | -0.23722 | 1.15793  | 2.12098  |
| N  | -1.45185 | -1.12296 | 2.06531  |
| Ni | -0.19356 | -0.28773 | 0.84543  |
| C  | 1.59434  | -0.01393 | -0.33685 |
| H  | 1.3201   | 0.93041  | -0.7973  |
| H  | 2.44569  | -0.0067  | 0.33687  |



|    |          |          |          |
|----|----------|----------|----------|
| C  | 0.83763  | -1.20673 | -0.55461 |
| H  | 1.19789  | -2.18206 | -0.2257  |
| C  | -0.48027 | -1.16865 | -1.00576 |
| H  | -0.8386  | -0.30022 | -1.57182 |
| C  | -1.2794  | -2.46449 | -1.11135 |
| O  | -1.32664 | -2.66469 | -2.22068 |
| C  | 3.18263  | -0.09223 | -2.06942 |
| H  | 3.35043  | -1.15141 | -1.90868 |
| C  | 2.50027  | 0.33984  | -3.25184 |
| C  | 1.71925  | -0.56117 | -4.01891 |
| C  | 2.54542  | 1.69305  | -3.67363 |
| C  | 1.0281   | -0.12891 | -5.14509 |
| H  | 1.66314  | -1.60232 | -3.71312 |
| C  | 1.85503  | 2.11742  | -4.80213 |
| H  | 3.14227  | 2.40258  | -3.10387 |
| C  | 1.09063  | 1.21031  | -5.54602 |
| H  | 0.43619  | -0.83939 | -5.71631 |
| H  | 1.91308  | 3.15866  | -5.10999 |
| H  | 0.55181  | 1.54357  | -6.42873 |
| H  | 3.89895  | 0.57727  | -1.60094 |
| H  | -0.78047 | -3.26201 | -0.60152 |
| H  | -2.2485  | -2.38918 | -0.66406 |
|    |          |          |          |
| C  | -1.13392 | 0.98313  | 3.13145  |
| C  | 0.2665   | 2.37938  | 1.89052  |
| C  | 0.18006  | 3.39099  | 2.83243  |
| C  | -0.58321 | 3.1698   | 3.98831  |
| C  | -1.23954 | 1.95627  | 4.13435  |
| C  | -1.8115  | -0.31349 | 3.15335  |
| C  | -2.05793 | -2.34834 | 2.03802  |
| C  | -2.97543 | -2.80536 | 2.9727   |
| C  | -3.31985 | -1.97003 | 4.04314  |
| C  | -2.73293 | -0.71509 | 4.12936  |
| H  | 0.86187  | 2.49866  | 0.99175  |
| H  | 0.70313  | 4.32724  | 2.66937  |
| H  | -0.65994 | 3.93201  | 4.75759  |
| H  | -1.82899 | 1.76067  | 5.02339  |
| H  | -1.76139 | -2.95971 | 1.19433  |
| H  | -3.41036 | -3.79288 | 2.86184  |
| H  | -4.03673 | -2.29297 | 4.79192  |
| H  | -2.99464 | -0.0454  | 4.94112  |
| N  | -0.36736 | 1.19414  | 2.01554  |
| N  | -1.47165 | -1.13647 | 2.114    |
| Ni | -0.21298 | -0.35341 | 0.87121  |
| C  | 1.65776  | -0.04242 | -0.29443 |
| H  | 1.26996  | 0.83326  | -0.8044  |

H 2.49738 0.10715 0.37555  
 UM06/6-311+g(d,p)-SMD-water//UB3LYP/6-31G(d)-gas  
 HF = -2505.2689

B''-TSL-3

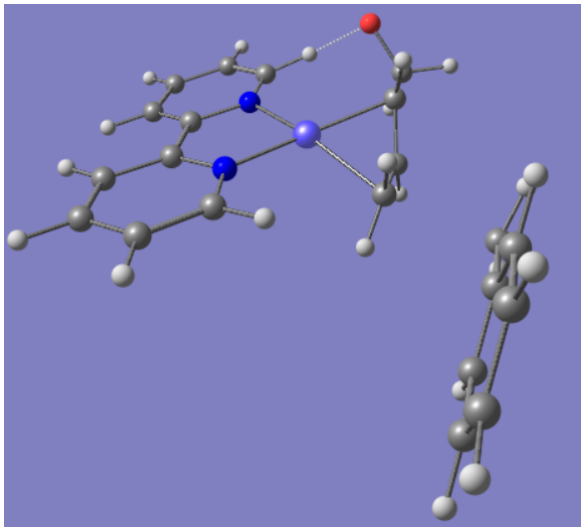

UB3LYP/6-31g(d)-gas  
 Imaginary frequency = -690.20 cm<sup>-1</sup>  
 Zero-point correction=  
 0.365903 (Hartree/Particle)  
 Thermal correction to Energy=  
 0.388736

Thermal correction to Enthalpy= 0.389680  
 Thermal correction to Gibbs Free Energy= 0.309870  
 Sum of electronic and zero-point Energies= -2505.294342  
 Sum of electronic and thermal Energies= -2505.271510  
 Sum of electronic and thermal Enthalpies= -2505.270566  
 Sum of electronic and thermal Free Energies= -2505.350376

|    |          |          |          |
|----|----------|----------|----------|
| C  | -1.30688 | 0.97795  | 2.4599   |
| C  | -0.57325 | 2.03894  | 0.5226   |
| C  | -0.70569 | 3.29597  | 1.09769  |
| C  | -1.14757 | 3.38255  | 2.41843  |
| C  | -1.4485  | 2.2111   | 3.10334  |
| C  | -1.61961 | -0.32063 | 3.07059  |
| C  | -1.78021 | -2.6172  | 2.65712  |
| C  | -2.23093 | -2.83573 | 3.96382  |
| C  | -2.36273 | -1.76406 | 4.83954  |
| C  | -2.06743 | -0.48102 | 4.38205  |
| H  | -0.21584 | 1.9269   | -0.49492 |
| H  | -0.46151 | 4.18095  | 0.52     |
| H  | -1.25603 | 4.34629  | 2.90679  |
| H  | -1.79422 | 2.25384  | 4.12959  |
| H  | -1.83246 | -3.37628 | 1.83445  |
| H  | -2.49217 | -3.84477 | 4.26653  |
| H  | -2.70712 | -1.91176 | 5.85965  |
| H  | -2.18738 | 0.37444  | 5.03754  |
| N  | -0.86432 | 0.896    | 1.1749   |
| N  | -1.45375 | -1.37986 | 2.23271  |
| Ni | -0.63504 | -0.90297 | 0.52471  |

|   |          |          |          |
|---|----------|----------|----------|
| C | 0.8627   | -0.61283 | -0.96595 |
| H | 0.17276  | -0.20868 | -1.70321 |
| H | 1.59993  | 0.06699  | -0.55613 |
| C | 0.7145   | -1.95441 | -0.48194 |
| H | 1.51791  | -2.40096 | 0.10553  |
| C | -0.49859 | -2.66369 | -0.596   |
| H | -1.22527 | -2.34672 | -1.35095 |
| C | -0.74657 | -4.06211 | -0.0521  |
| C | 2.31375  | -0.68497 | -2.77826 |
| H | 1.76754  | -1.48293 | -3.26861 |
| C | 2.26474  | 0.64318  | -3.31625 |
| C | 1.28095  | 1.01444  | -4.26747 |
| C | 3.16363  | 1.64877  | -2.88047 |
| C | 1.20875  | 2.31287  | -4.75814 |
| H | 0.57962  | 0.26147  | -4.61986 |
| C | 3.08715  | 2.94601  | -3.37533 |
| H | 3.93166  | 1.3899   | -2.15474 |
| C | 2.11021  | 3.28896  | -4.317   |
| H | 0.44978  | 2.56822  | -5.49351 |
| H | 3.79645  | 3.69518  | -3.03204 |
| H | 2.05516  | 4.30185  | -4.70617 |
| H | 3.18266  | -0.99119 | -2.20425 |
| O | -2.00181 | -4.14632 | 0.44186  |
| H | -0.51611 | -4.78164 | -0.88264 |
| H | 0.07115  | -4.25204 | 0.7066   |

UM06/6-311+g(d,p)-SMD-water//UB3LYP/6-31G(d)-gas  
HF = -2505.2704

B''-TSB

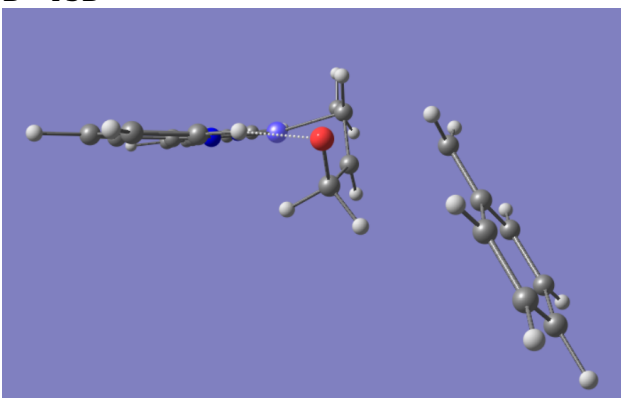

UB3LYP/6-31g(d)-gas  
Imaginary frequency =  $-469.64 \text{ cm}^{-1}$   
Zero-point correction= 0.367811 (Hartree/Particle)  
Thermal correction to Energy= 0.390034  
Thermal correction to Enthalpy= 0.390978  
Thermal correction to Gibbs Free Energy= 0.313856

|                                              |                            |
|----------------------------------------------|----------------------------|
| Sum of electronic and zero-point Energies=   | -2505.299873               |
| Sum of electronic and thermal Energies=      | -2505.277651               |
| Sum of electronic and thermal Enthalpies=    | -2505.276707               |
| Sum of electronic and thermal Free Energies= | -2505.353829               |
| C                                            | -1.80936 0.7111 2.99187    |
| C                                            | -1.90017 1.86364 0.95515   |
| C                                            | -2.54453 2.93768 1.57502   |
| C                                            | -2.8104 2.89256 2.94046    |
| C                                            | -2.43832 1.75954 3.66263   |
| C                                            | -1.44326 -0.57421 3.61927  |
| C                                            | -0.64935 -2.72612 3.19952  |
| C                                            | -0.75578 -3.07952 4.53942  |
| C                                            | -1.22673 -2.12901 5.44609  |
| C                                            | -1.5761 -0.86538 4.97888   |
| H                                            | -1.68401 1.84452 -0.13999  |
| H                                            | -2.82344 3.79752 0.97445   |
| H                                            | -3.30753 3.71876 3.44117   |
| H                                            | -2.65075 1.69117 4.72384   |
| H                                            | -0.29552 -3.42657 2.45206  |
| H                                            | -0.47626 -4.07793 4.85854  |
| H                                            | -1.32186 -2.36744 6.50117  |
| H                                            | -1.94382 -0.11193 5.66614  |
| N                                            | -1.53086 0.77298 1.66148   |
| N                                            | -0.97799 -1.50488 2.74006  |
| Ni                                           | -0.76297 -0.87133 0.95418  |
| C                                            | 0.41297 -0.30447 -1.02147  |
| H                                            | 1.39382 -0.63414 -0.66391  |
| C                                            | -0.65951 -1.22253 -0.95821 |
| H                                            | -1.58519 -0.92645 -1.44929 |
| C                                            | -0.52708 -2.42792 -0.19993 |
| H                                            | 0.45938 -2.89375 -0.13545  |
| C                                            | 0.21831 1.20021 -1.2196    |
| H                                            | 1.12319 1.57262 -1.76076   |
| C                                            | 0.66427 -0.70089 -3.35107  |
| H                                            | -0.28173 -0.171 -3.38089   |
| H                                            | 0.41698 1.60604 -0.17461   |
| O                                            | -0.95872 1.53941 -1.74422  |
| C                                            | 1.83659 -0.04723 -3.82354  |
| C                                            | 1.81382 1.35087 -4.08341   |
| C                                            | 3.05041 -0.74892 -4.04597  |
| C                                            | 2.94891 1.99907 -4.55637   |
| H                                            | 0.88872 1.89324 -3.90404   |
| C                                            | 4.17758 -0.09106 -4.51736  |
| H                                            | 3.07832 -1.81968 -3.85271  |
| C                                            | 4.13389 1.28652 -4.77636   |
| H                                            | 2.91443 3.06715 -4.75599   |

H 5.09646 -0.64603 -4.69033  
 H 5.01747 1.79841 -5.14845  
 H 0.6398 -1.7848 -3.29719  
 H -1.34407 -3.14984 -0.23024  
 UM06/6-311+g(d,p)-SMD-water//UB3LYP/6-31G(d)-gas  
 HF=-2505.2692424  
 UB3LYP-D3/6-311+g(d,p)-SMD-water//UB3LYP/6-31G(d)-gas  
 HF=-2506.1777816  
 DLPNO-CCSD(T)/def2-TZVPP//uB3LYP/6-31G(d)-gas  
 HF = -2503.270786690197  
 $\Delta G_{\text{solv}} = -0.0372232$

B''-TSB-2

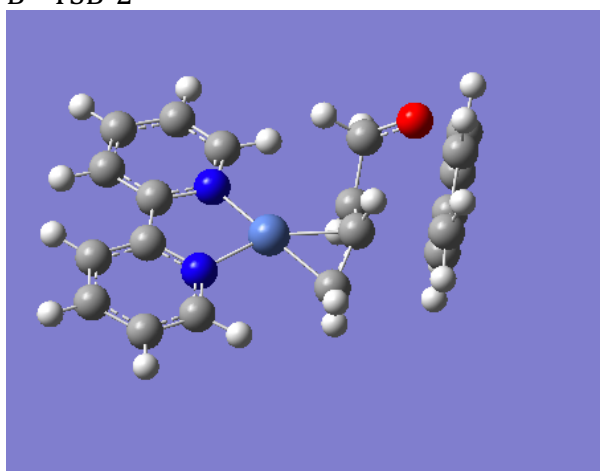

UB3LYP/6-31g(d)-gas  
 Imaginary frequency =  $-570.54 \text{ cm}^{-1}$   
 Zero-point correction= 0.366566 (Hartree/Particle)  
 Thermal correction to Energy= 0.389164  
 Thermal correction to Enthalpy= 0.390108  
 Thermal correction to Gibbs Free Energy= 0.312030  
 Sum of electronic and zero-point Energies= -2505.286375  
 Sum of electronic and thermal Energies= -2505.263777  
 Sum of electronic and thermal Enthalpies= -2505.262833  
 Sum of electronic and thermal Free Energies= -2505.340911  
 C -1.53132 0.76541 2.57804  
 C 0.25036 1.86711 1.5835  
 C -0.27739 3.11203 1.91509  
 C -1.49347 3.17274 2.59292  
 C -2.12467 1.9817 2.93018  
 C -2.09251 -0.54683 2.92656  
 C -1.83772 -2.84207 2.67807  
 C -2.91561 -3.10236 3.51483  
 C -3.60643 -2.02692 4.07587  
 C -3.1847 -0.73617 3.7785

|    |          |          |          |
|----|----------|----------|----------|
| H  | 1.19501  | 1.79191  | 1.06501  |
| H  | 0.26598  | 4.00908  | 1.63876  |
| H  | -1.94243 | 4.12622  | 2.85456  |
| H  | -3.0735  | 1.99674  | 3.45384  |
| H  | -1.27884 | -3.64832 | 2.22169  |
| H  | -3.20014 | -4.12881 | 3.72031  |
| H  | -4.45126 | -2.19025 | 4.73788  |
| H  | -3.68876 | 0.11581  | 4.21966  |
| N  | -0.35572 | 0.70321  | 1.89024  |
| N  | -1.4282  | -1.59647 | 2.36662  |
| Ni | 0.08838  | -1.10889 | 1.27661  |
| C  | 1.32509  | -0.67475 | -0.53293 |
| H  | 0.38987  | -0.27134 | -0.92389 |
| C  | 1.41472  | -1.96639 | 0.02001  |
| H  | 2.41562  | -2.23678 | 0.36197  |
| C  | 0.30545  | -2.79282 | 0.28662  |
| H  | -0.5512  | -2.8161  | -0.39227 |
| C  | 2.62892  | 0.19303  | -0.43564 |
| H  | 2.7359   | 0.42393  | 0.67156  |
| C  | 1.63484  | -1.17853 | -2.79413 |
| H  | 0.86696  | -1.94682 | -2.84965 |
| H  | 2.33583  | 1.18272  | -0.89708 |
| O  | 3.70376  | -0.3808  | -0.94942 |
| C  | 1.46392  | 0.04053  | -3.51623 |
| C  | 0.28304  | 0.32637  | -4.24963 |
| C  | 2.49918  | 1.01716  | -3.50697 |
| C  | 0.15529  | 1.51085  | -4.96409 |
| H  | -0.5197  | -0.40843 | -4.26459 |
| C  | 2.36152  | 2.19462  | -4.23254 |
| H  | 3.38075  | 0.80335  | -2.90345 |
| C  | 1.19484  | 2.4505   | -4.96392 |
| H  | -0.75237 | 1.70632  | -5.53058 |
| H  | 3.16526  | 2.92726  | -4.22435 |
| H  | 1.09204  | 3.37625  | -5.5246  |
| H  | 2.63198  | -1.44334 | -2.4591  |
| H  | 0.5214   | -3.75162 | 0.75616  |

UM06 /6-311+g(d,p)-SMD-water//UB3LYP/6-31G(d)-gas  
HF=-2505.2732996  
UB3LYP-D3/6-311+g(d,p)-SMD-water//UB3LYP/6-31G(d)-gas  
HF=-2506.1816811

---

<sup>i</sup> (a) Becke, A. D. J. Chem. Phys. **1993**, 98, 1372-1377. (b) Becke, A. D. J. Chem. Phys. **1993**, 98, 5648-5652. (c) Lee, C.; Yang, W.; Parr, R. G. Phys. Rev. B. **1988**, 37, 785-789. (d) Stephens, P. J.; Devlin, F. J.; Chabalowski, C. F.; Frisch, M. J. J. Phys. Chem. **1994**, 98, 11623-11627.

- 
- <sup>ii</sup> Frisch, M. J.; Trucks, G. W.; Schlegel, H. B.; Scuseria, G. E.; Robb, M. A.; Cheeseman, J. R.; Scalmani, G.; Barone, V.; Mennucci, B.; Petersson, G. A.; Nakatsuji, H.; Caricato, M.; Li, X.; Hratchian, H. P.; Izmaylov, A. F.; Bloino, J.; Zheng, G.; Sonnenberg, J. L.; Hada, M.; Ehara, M.; Toyota, K.; Fukuda, R.; Hasegawa, J.; Ishida, M.; Nakajima, T.; Honda, Y.; Kitao, O.; Nakai, H.; Vreven, T.; Montgomery, J. A., Jr.; Peralta, J. E.; Ogliaro, F.; Bearpark, M.; Heyd, J. J.; Brothers, E.; Kudin, K. N.; Staroverov, V. N.; Kobayashi, R.; Normand, J.; Raghavachari, K.; Rendell, A.; Burant, J. C.; Iyengar, S. S.; Tomasi, J.; Cossi, M.; Rega, N.; Millam, J. M.; Klene, M.; Knox, J. E.; Cross, J. B.; Bakken, V.; Adamo, C.; Jaramillo, J.; Gomperts, R.; Stratmann, R. E.; Yazyev, O.; Austin, A. J.; Cammi, R.; Pomelli, C.; Ochterski, J. W.; Martin, R. L.; Morokuma, K.; Zakrzewski, V. G.; Voth, G. A.; Salvador, P.; Dannenberg, J. J.; Dapprich, S.; Daniels, A. D.; Farkas, O.; Foresman, J. B.; Ortiz, J. V.; Cioslowski, J.; Fox, D. J. Gaussian 09. Revision D.01; Gaussian, Inc.: Wallingford, CT, 2009.
- <sup>iii</sup> Marenich, A. V.; Cramer, C. J.; Truhlar, D. G. *I. Phys. Chem. B*, **2009**, *113*, 6378-6396.
- <sup>iv</sup> Zhao, Y.; Truhlar, D. G. *Theor. Chem. Acc.*, **2008**, *120*, 215-41
- <sup>v</sup> S. Grimme, "Semiempirical GGA-type density functional constructed with a long-range dispersion correction," *J. Comp. Chem.*, **27** (2006) 1787-99.
- <sup>vi</sup> F. Weigend and R. Ahlrichs, *Phys. Chem. Chem. Phys.* **7**, 3297 (2005)
- <sup>vii</sup> A. Hellweg, C. Hattig, S. Hofener and W. Klopper, *Theor. Chem. Acc.* **117**, 587 (2007).
- <sup>viii</sup> (a) Neese, F. The ORCA program system *Wiley Interdiscip. Rev.: Comput. Mol. Sci.* **2012**, *2*, 73. (b) Riplinger, C.; Sandhoefer, B.; Hansen, A.; Neese, F. Natural triple excitations in local coupled cluster calculations with pair natural orbitals. *J. Chem. Phys.* **2013**, *139*, 134101.
- <sup>ix</sup> (a) Liakos, D. G.; Sparta, M.; Kesharwani, M. K.; Martin, J. M. L.; Neese, F. Exploring the Accuracy Limits of Local Pair Natural Orbital Coupled-Cluster Theory. *J. Chem. Theory Comput.*, **2015**, *11*, 1525; (b) Paulechka, E.; Kazakov, A. Efficient DLPNO-CCSD(T)-Based Estimation of Formation Enthalpies for C-, H-, O-, and N-Containing Closed-Shell Compounds Validated Against Critically Evaluated Experimental Data. *J. Phys. Chem. A*, **2017**, *121*, 4379.
- <sup>x</sup> For selected examples, see: (a) Lu, Q.; Neese, F.; Bistoni, G. Formation of Agostic Structures Driven by London Dispersion. *Angew. Chem. Int. Ed.* **2018**, *57*, 4760-4764. (b) Riplinger, C.; Sampson, M. D.; Ritzmann, A. M.; Kubiak, C. P.; Carter, E. A. Mechanistic Contrasts between Manganese and Ruthenium Bipyridine Electrocatalysts for the Reduction of Carbon Dioxide. *J. Am. Chem. Soc.* **2014**, *136*, 16285-16298.
- <sup>xi</sup> CYLview, 1.0b; Legault, C. Y., Université de Sherbrooke, 2009 (<http://www.cylview.org>)
- <sup>iv</sup> GaussView, Version 5, Dennington, R., Keith, T. A., Millam, J. M., Semichem Inc., Shawnee Mission, KS, 2009.

<sup>1</sup>H NMR (CDCl<sub>3</sub>, 500 MHz) and <sup>13</sup>C NMR (CDCl<sub>3</sub>, 126 MHz) of (*E*)-5-phenylpent-2-en-1-ol (**1a**)

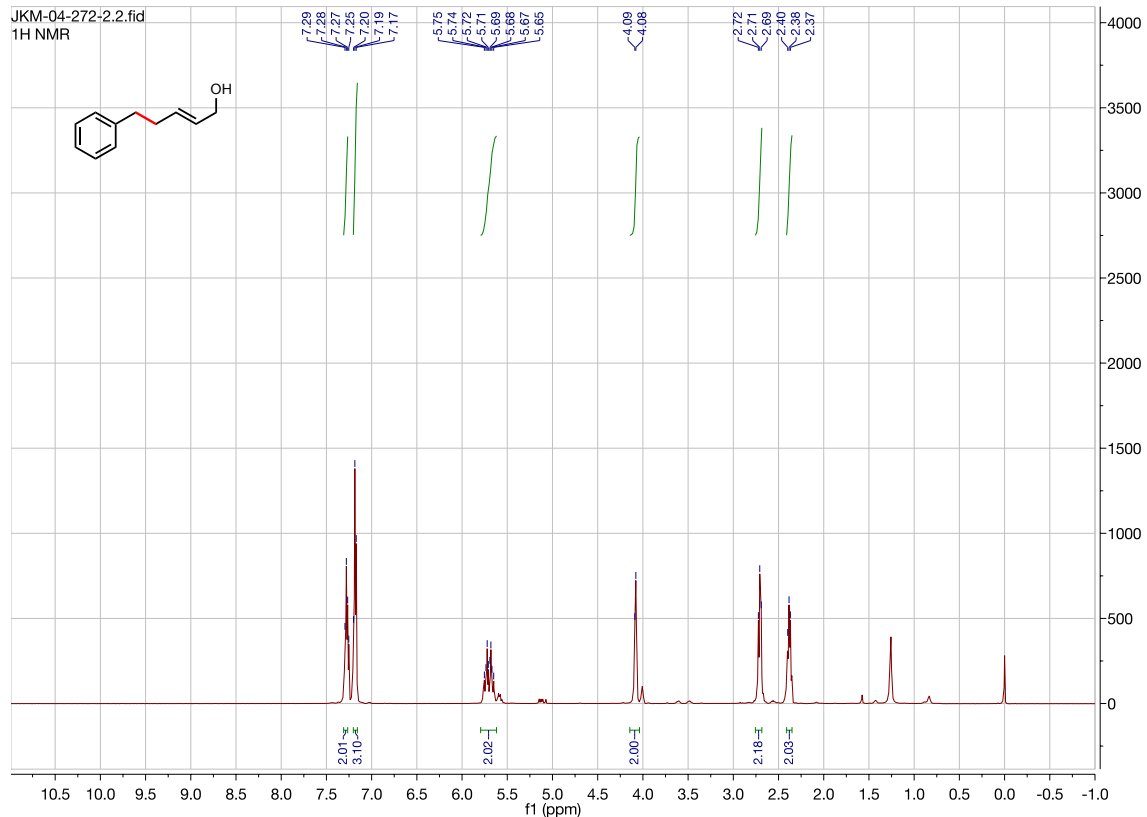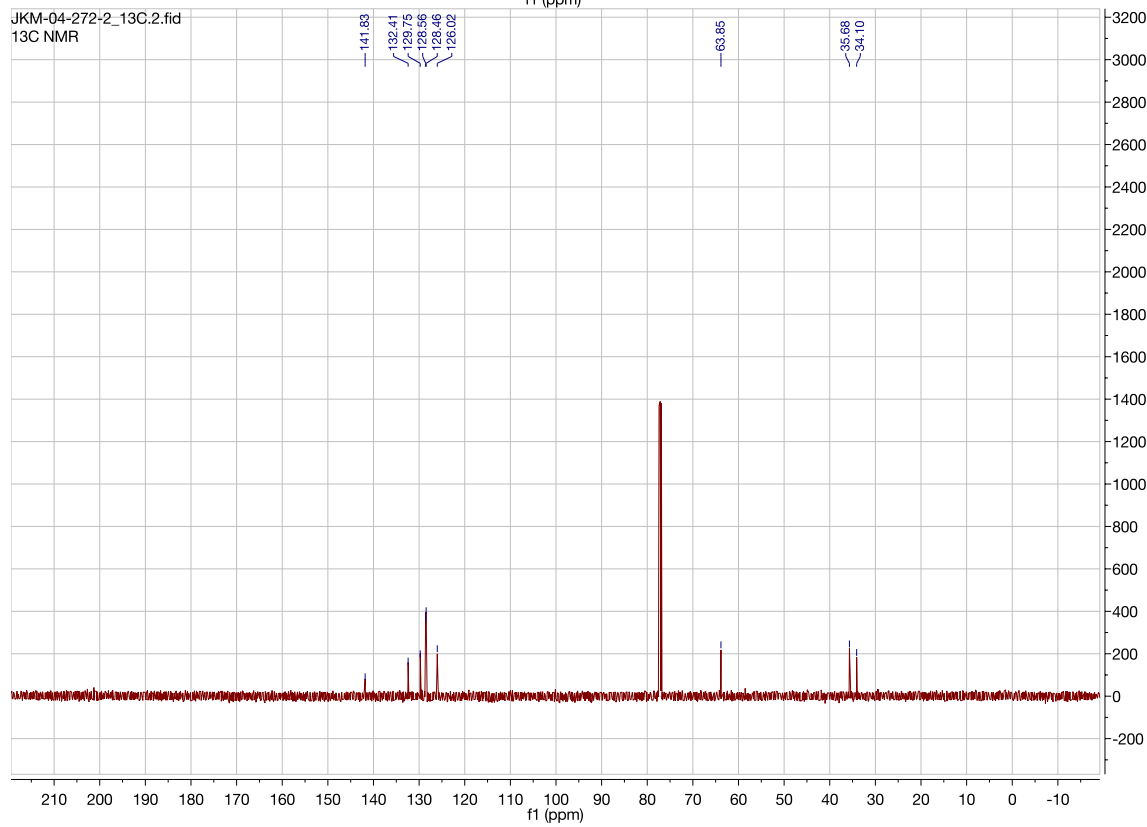



<sup>1</sup>H NMR (CDCl<sub>3</sub>, 500 MHz) and <sup>13</sup>C NMR (CDCl<sub>3</sub>, 126 MHz) of (*E*)-5-(3,5-dimethoxyphenyl)pent-2-en-1-ol (**1b**)

JKM-04-276\_1.41.fid

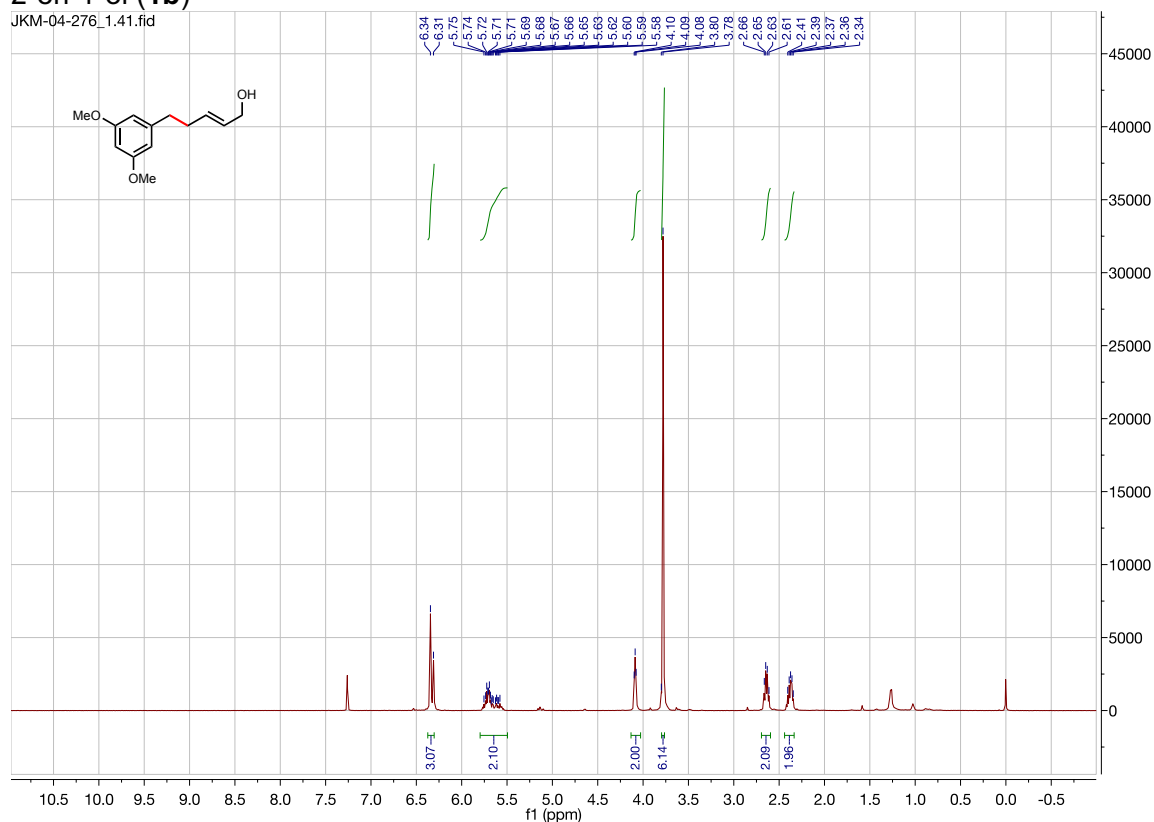

JKM-04-276 check\_13C.1.fid

<sup>13</sup>C NMR

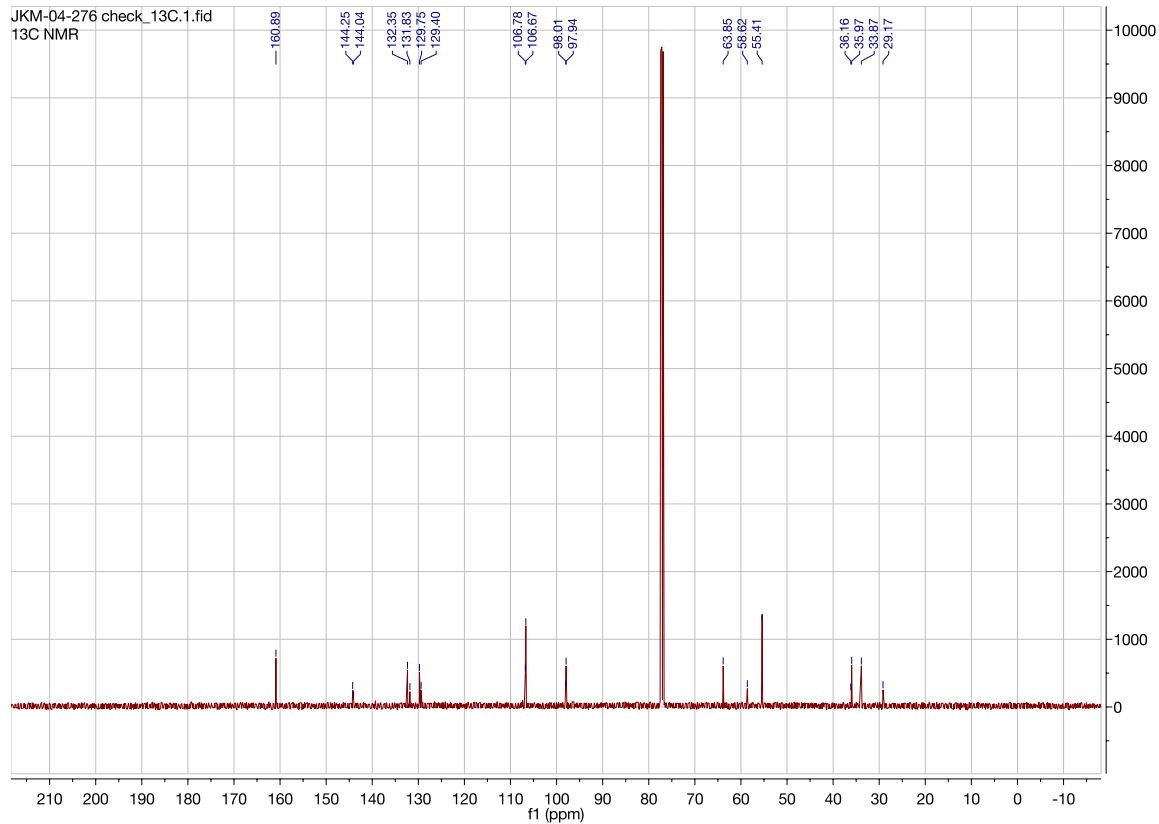

Note: Mixture of *E/Z* isomers.

<sup>1</sup>H NMR (CDCl<sub>3</sub>, 500 MHz) and <sup>13</sup>C NMR (CDCl<sub>3</sub>, 126 MHz) of (*E*)-5-(3-chlorophenyl)pent-2-en-1-ol (**1c**)

JKM-05-064.1.fid  
1H NMR

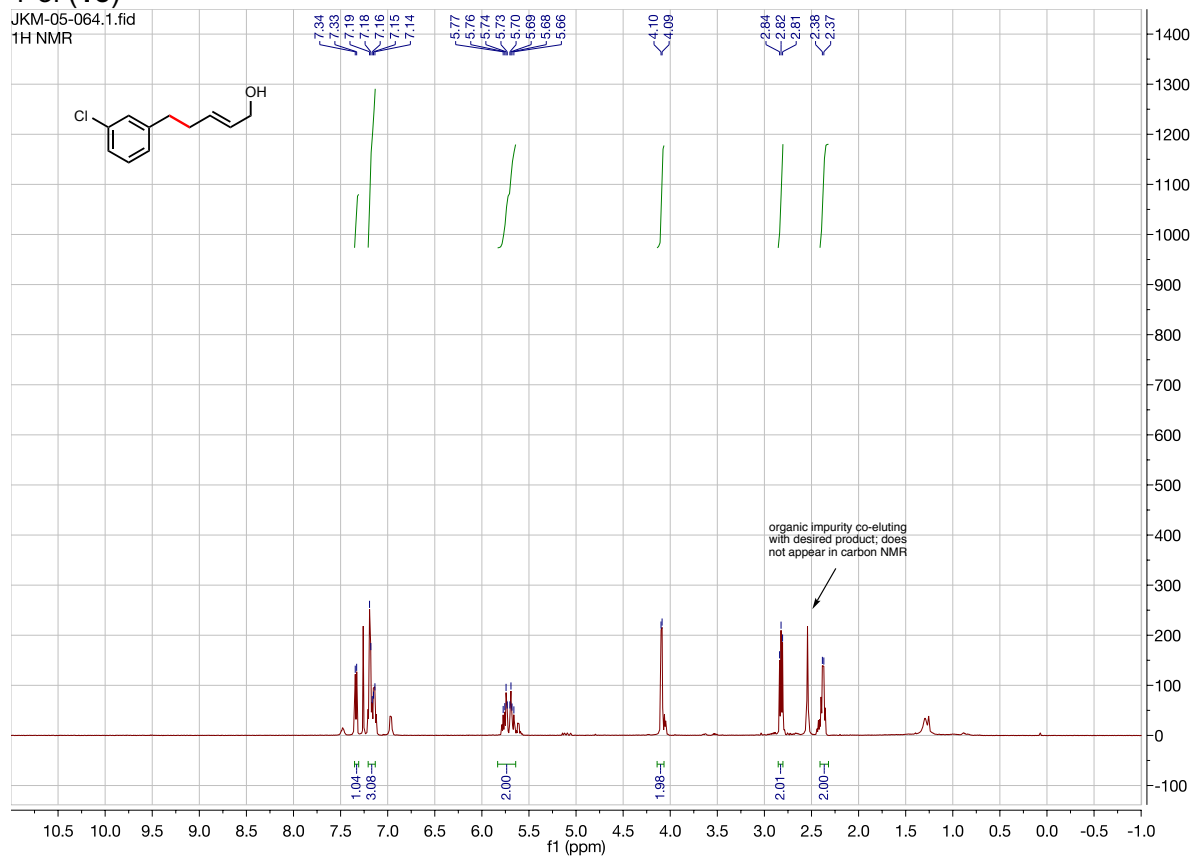

JKM-05-064\_13C.1.fid  
13C NMR

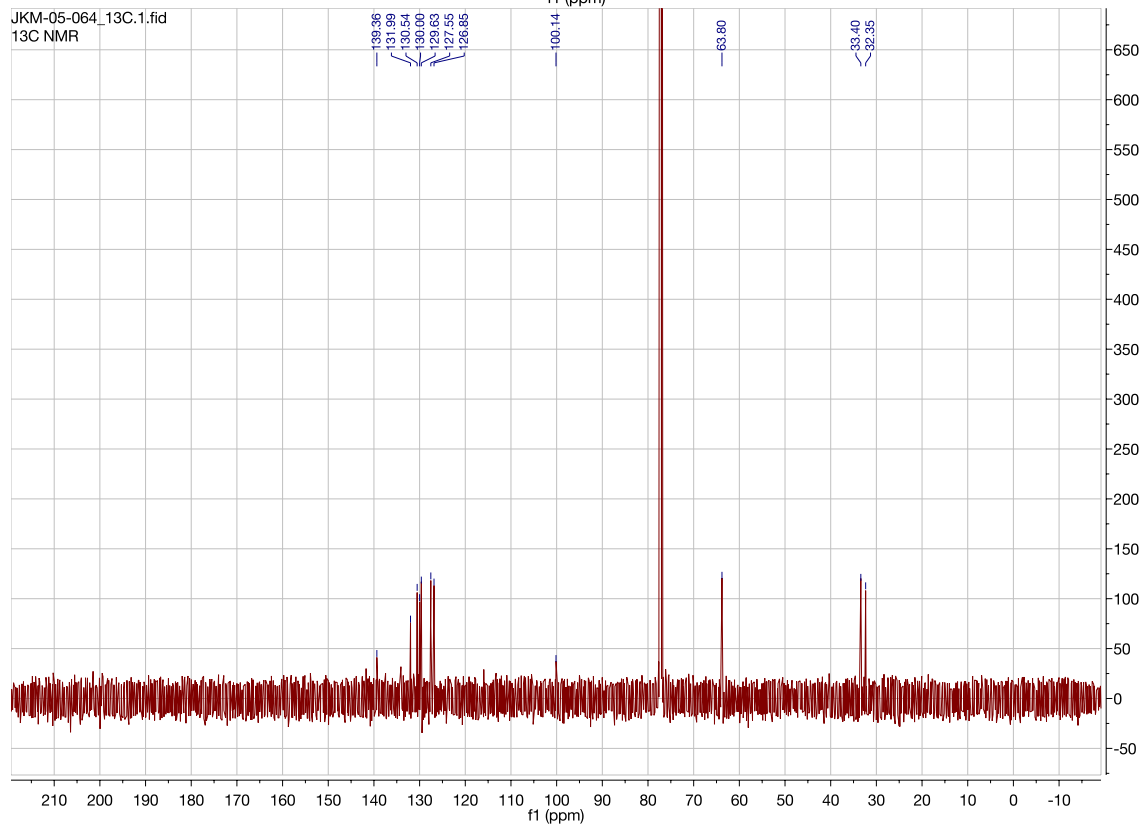

<sup>1</sup>H NMR (CDCl<sub>3</sub>, 500 MHz) and <sup>13</sup>C NMR (CDCl<sub>3</sub>, 126 MHz) of (*E*)-5-(4-fluorophenyl)pent-2-en-1-ol (**1d**)

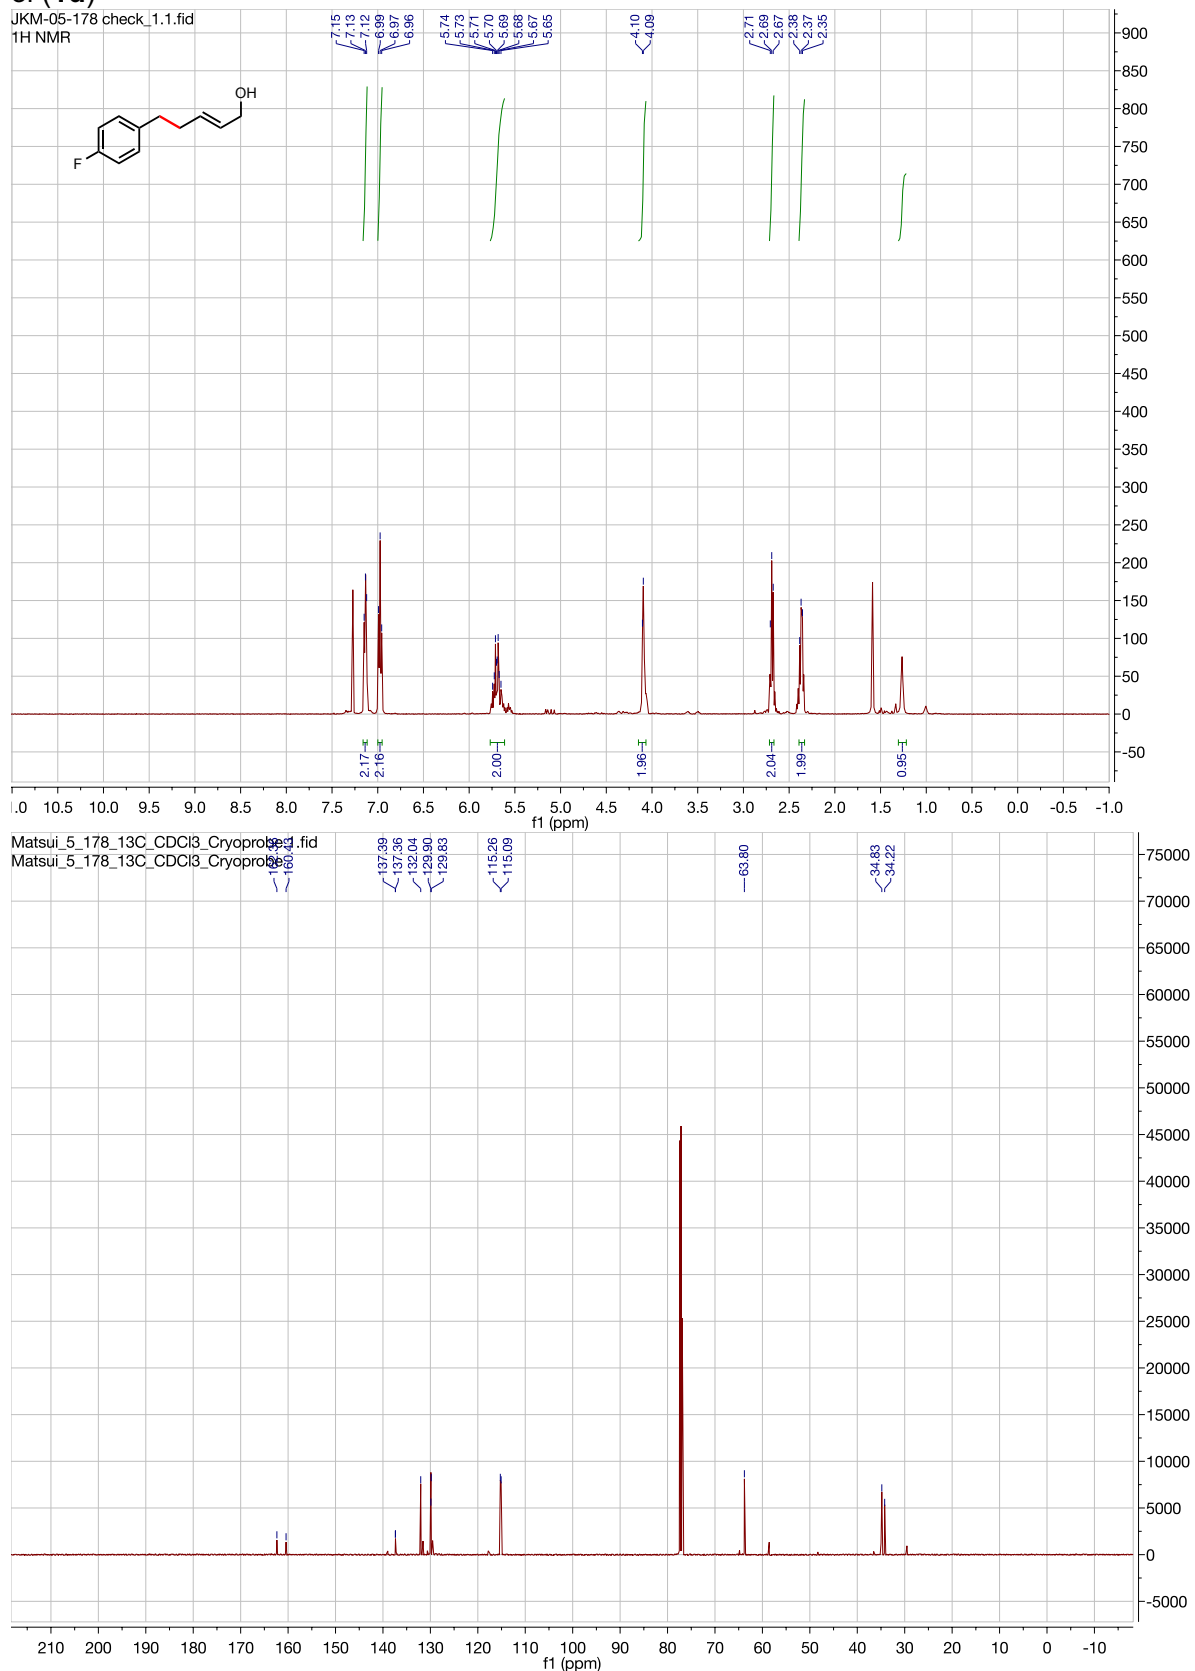

<sup>19</sup>F NMR (CDCl<sub>3</sub>, 471 MHz) of (*E*)-5-(4-fluorophenyl)pent-2-en-1-ol (**1d**)

JKM-05-178 check\_19F\_1.1.fid  
F19 NMR

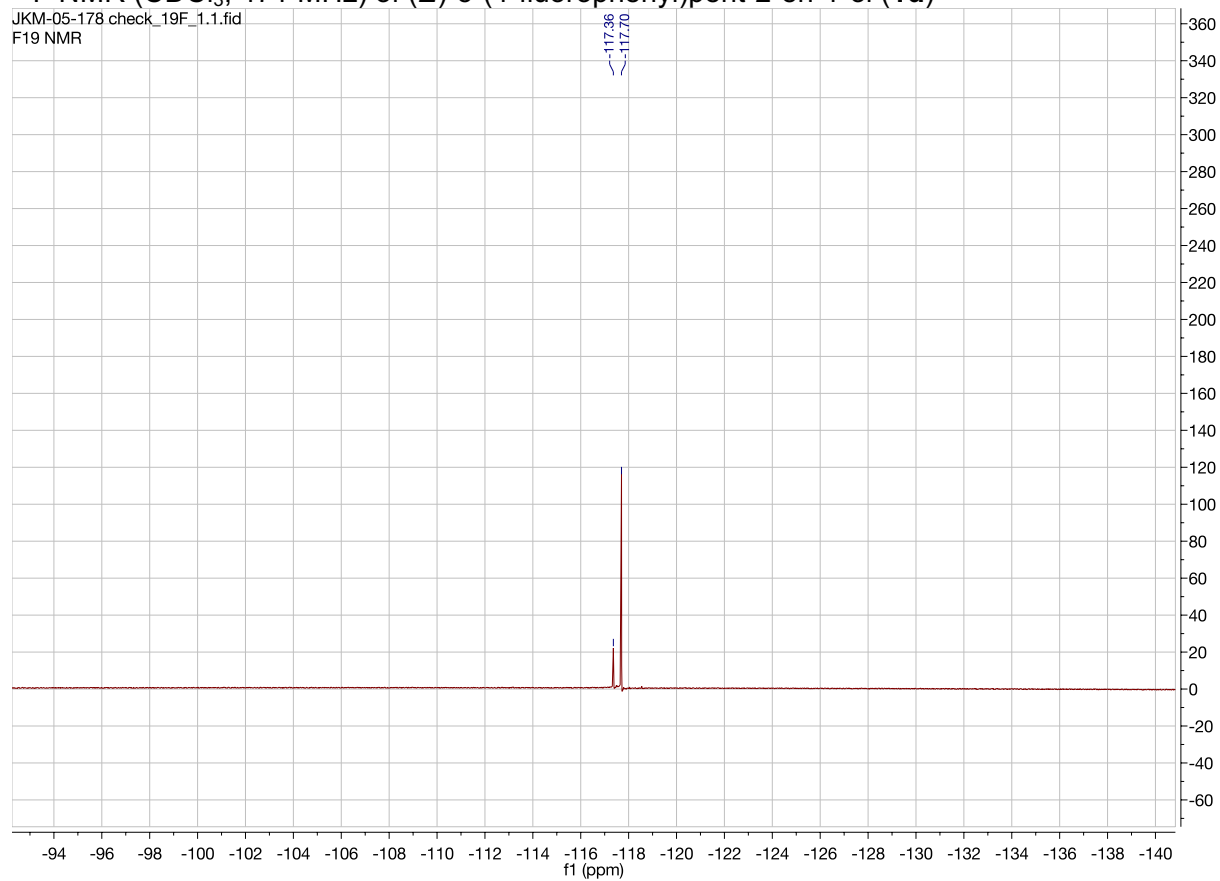

<sup>1</sup>H NMR (CDCl<sub>3</sub>, 500 MHz) and <sup>13</sup>C NMR (CDCl<sub>3</sub>, 126 MHz) of (*E*)-5-(2,4-difluorophenyl)pent-2-en-1-ol (**1e**)

JKM-05-180 check.1.fid  
1H NMR

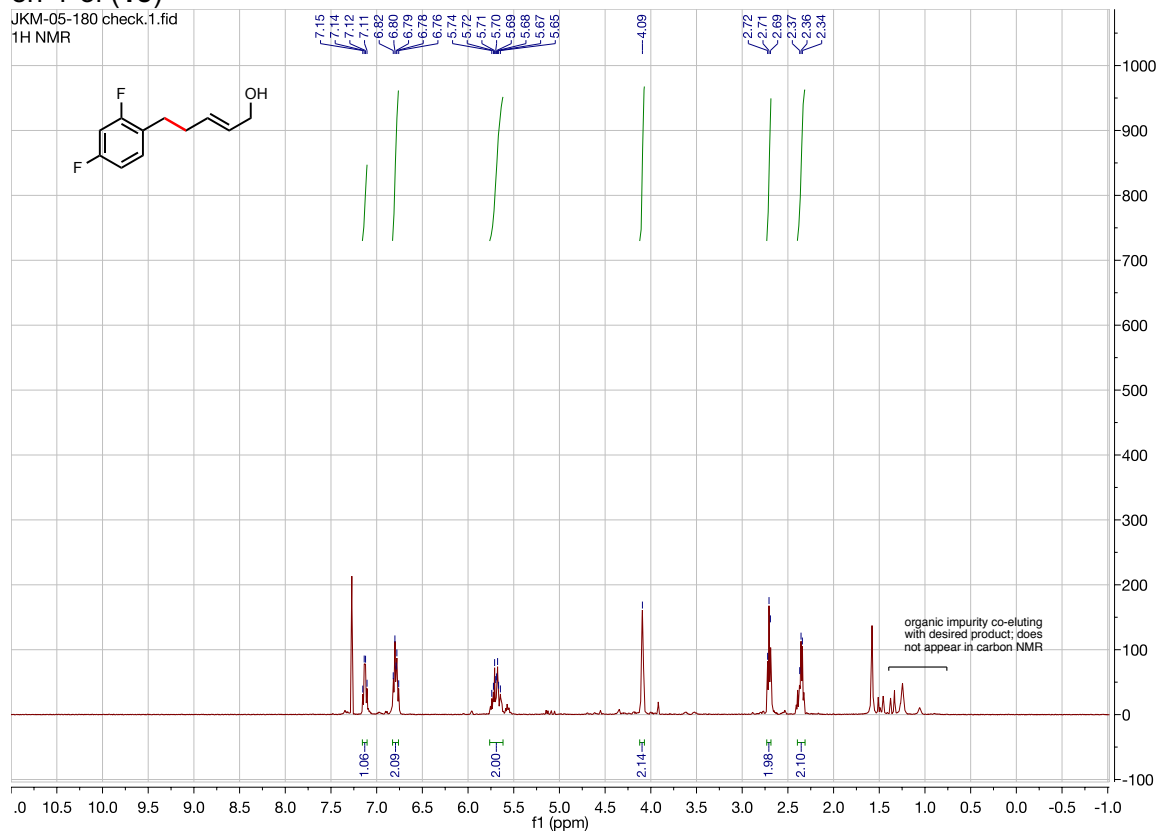

JKM-05-180-1\_13C.1.fid  
13C NMR

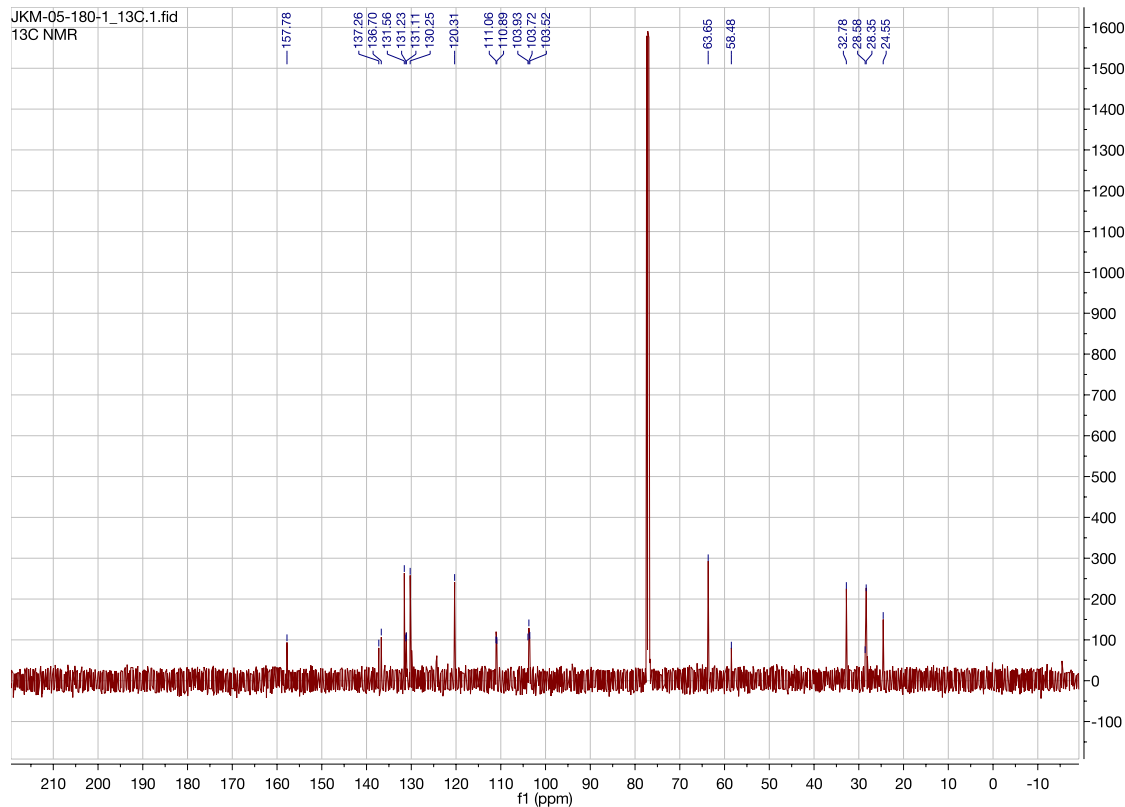

<sup>19</sup>F NMR (CDCl<sub>3</sub>, 471 MHz) of (*E*)-5-(2,4-difluorophenyl)pent-2-en-1-ol (**1e**)

JKM-05-180 check\_19F1.fid  
F19 NMR

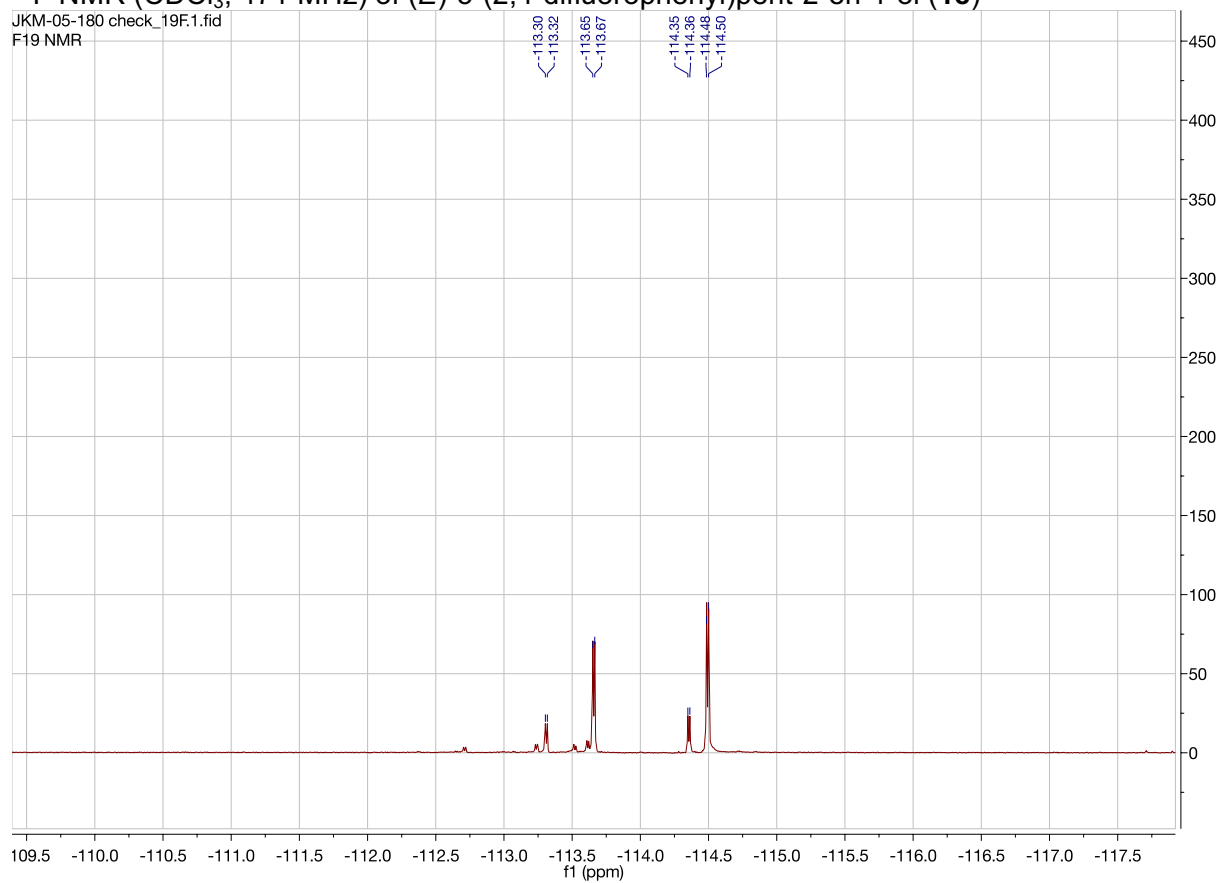

<sup>1</sup>H NMR (CDCl<sub>3</sub>, 500 MHz) and <sup>13</sup>C NMR (CDCl<sub>3</sub>, 126 MHz) of methyl (*E*)-4-(5-hydroxypent-3-en-1-yl)benzoate (**1f**)

JKM-05-054.1.fid  
sz004

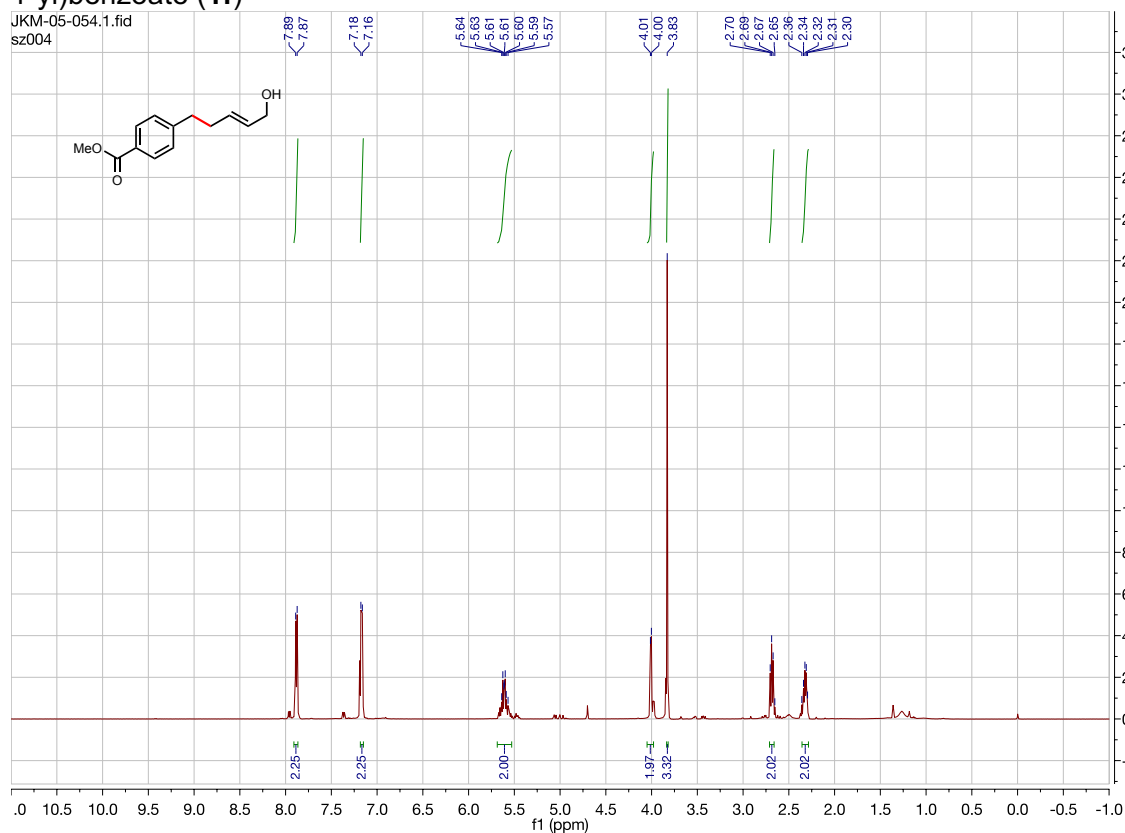

JKM-05-054 check\_13C.1.fid  
13C NMR

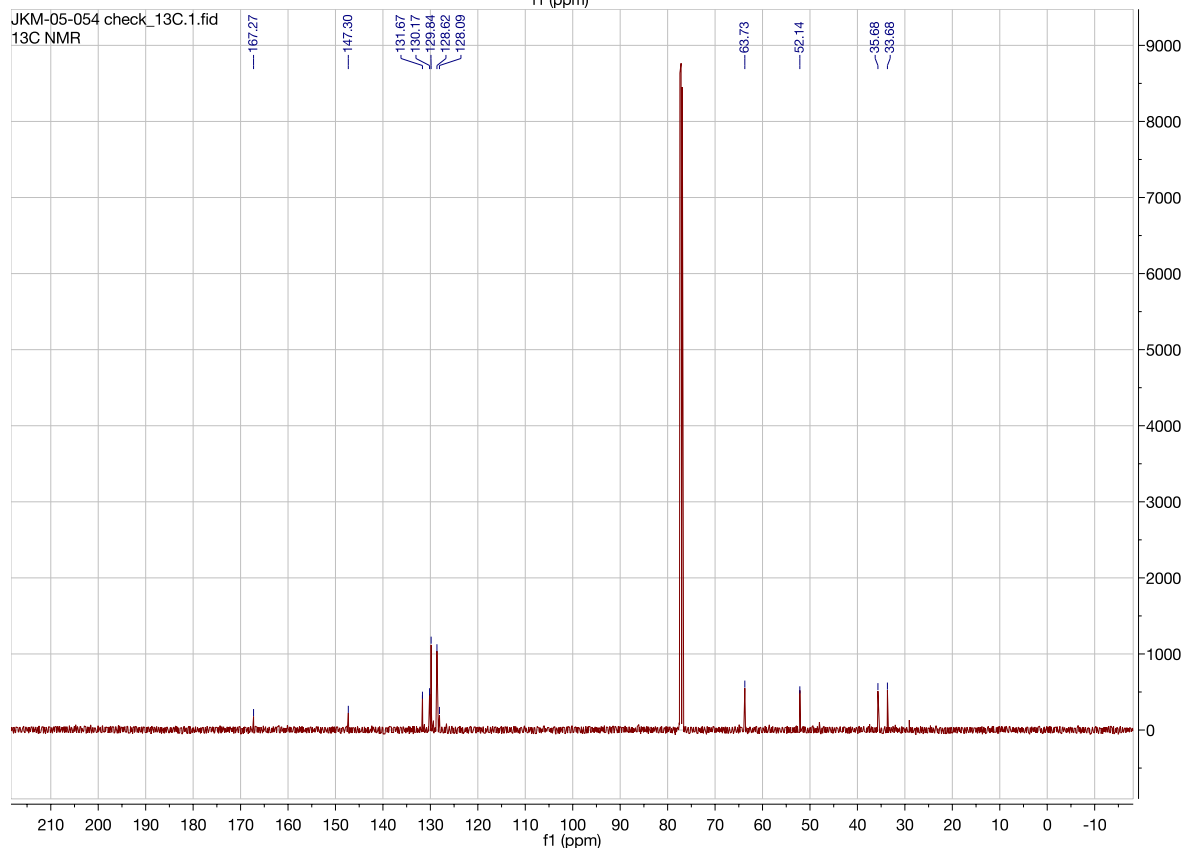

<sup>1</sup>H NMR (CDCl<sub>3</sub>, 500 MHz) and <sup>13</sup>C NMR (CDCl<sub>3</sub>, 126 MHz) of (*E*)-5-(*o*-tolyl)pent-2-en-1-ol (**1g**)

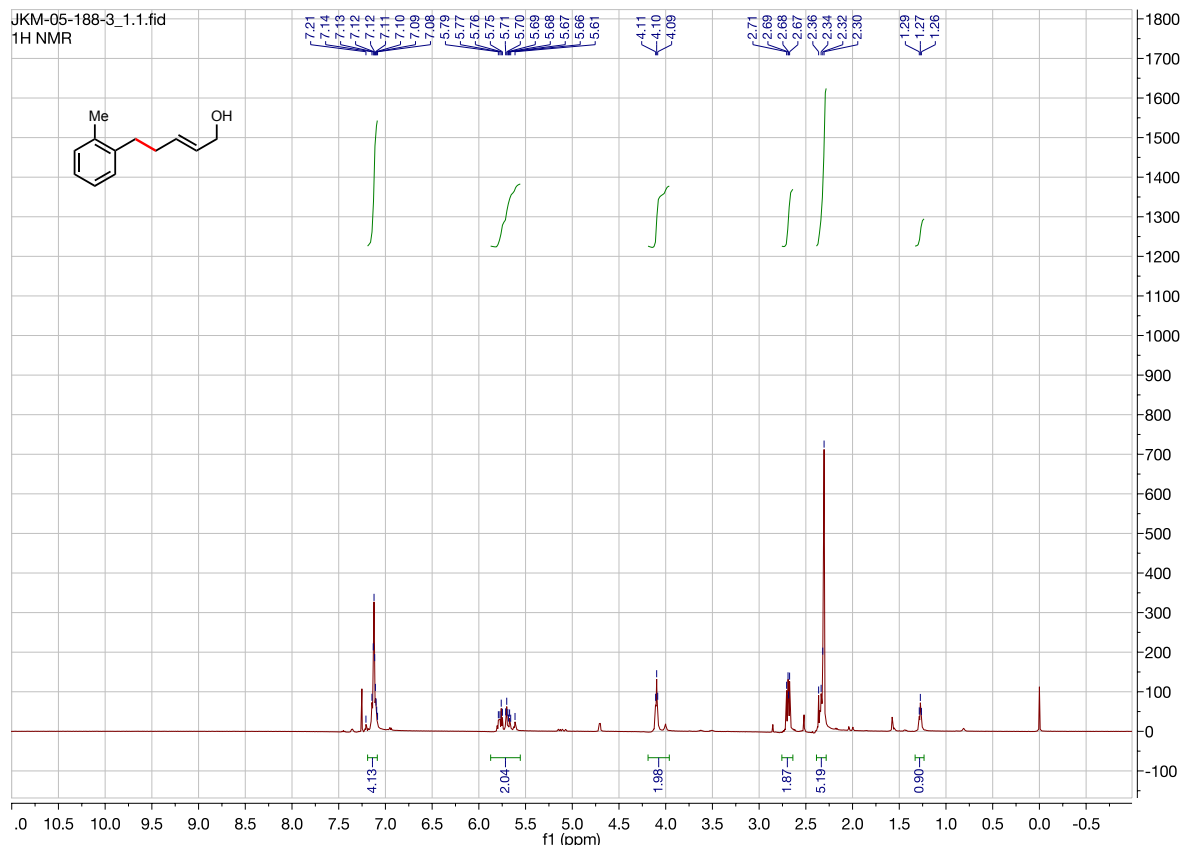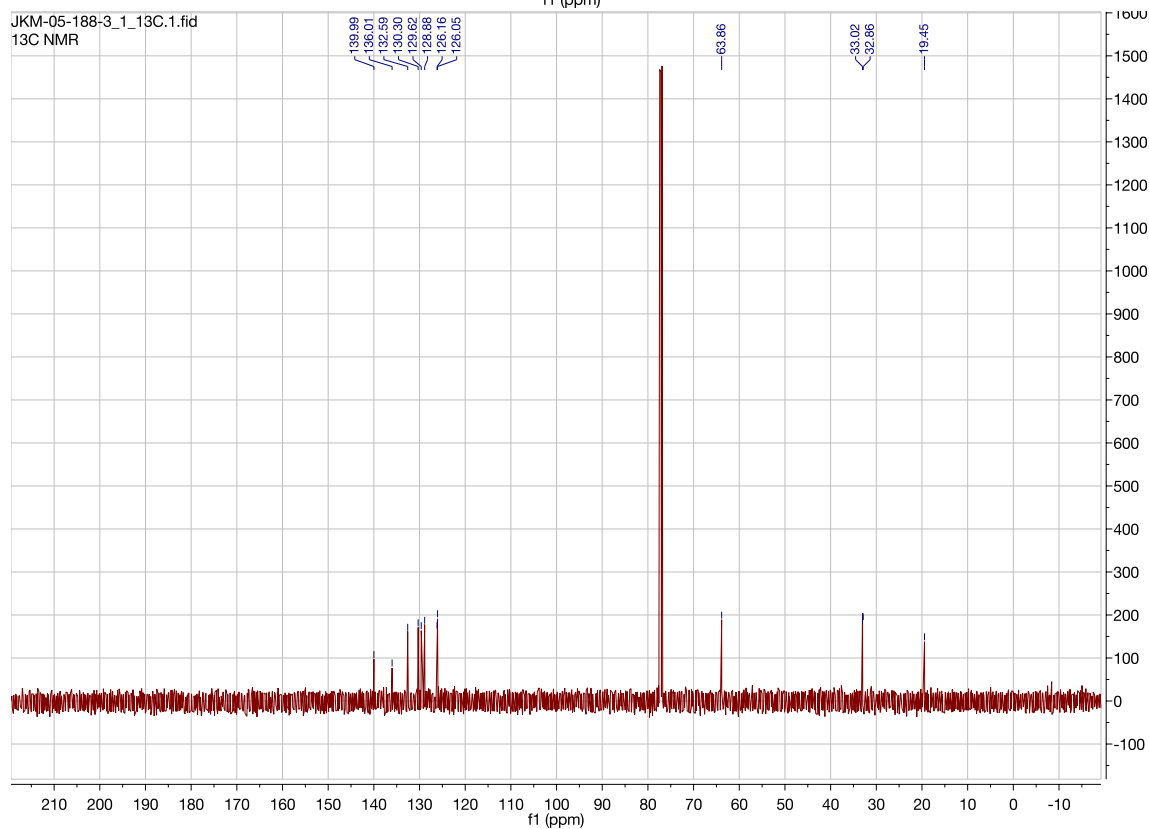



<sup>1</sup>H NMR (CDCl<sub>3</sub>, 500 MHz) and <sup>13</sup>C NMR (CDCl<sub>3</sub>, 126 MHz) of (*E*)-5-(cyclopentyloxy)pent-2-en-1-ol (**1h**)

JKM-05-100.1.fid  
1H NMR

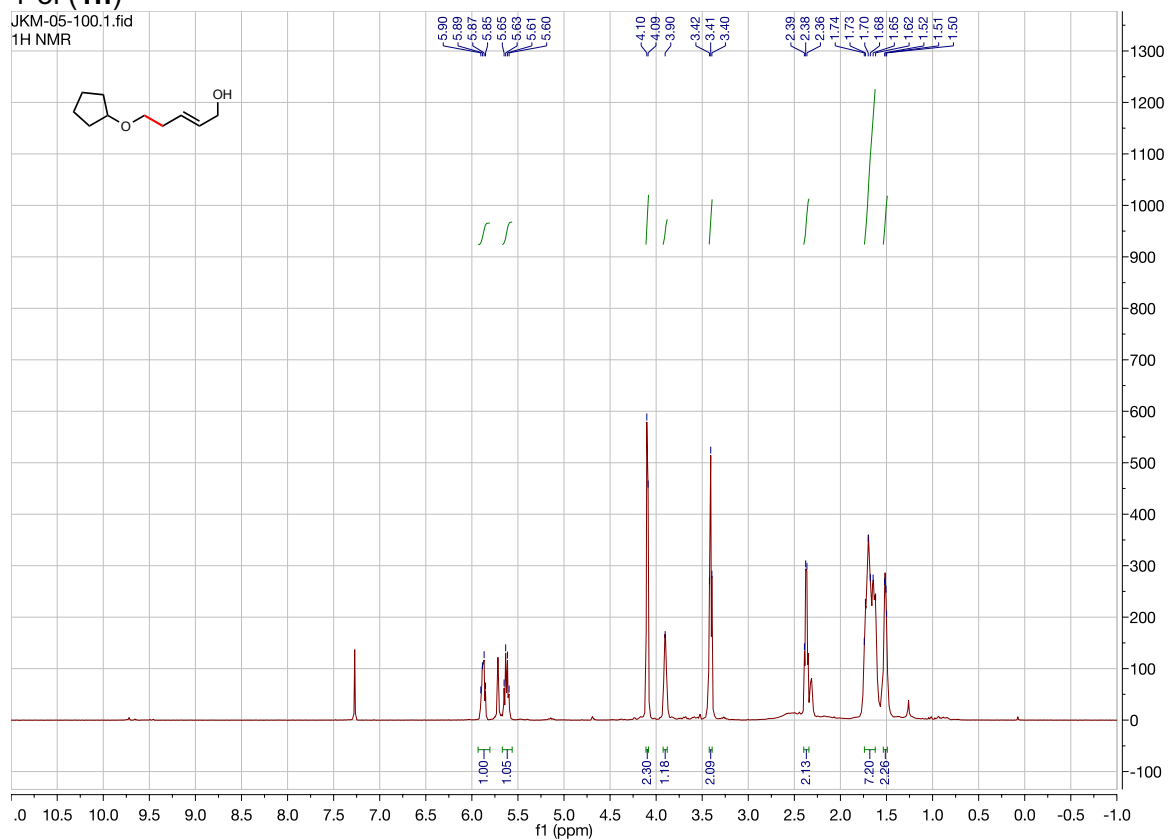

JKM-05-100\_13C.1.fid  
13C NMR

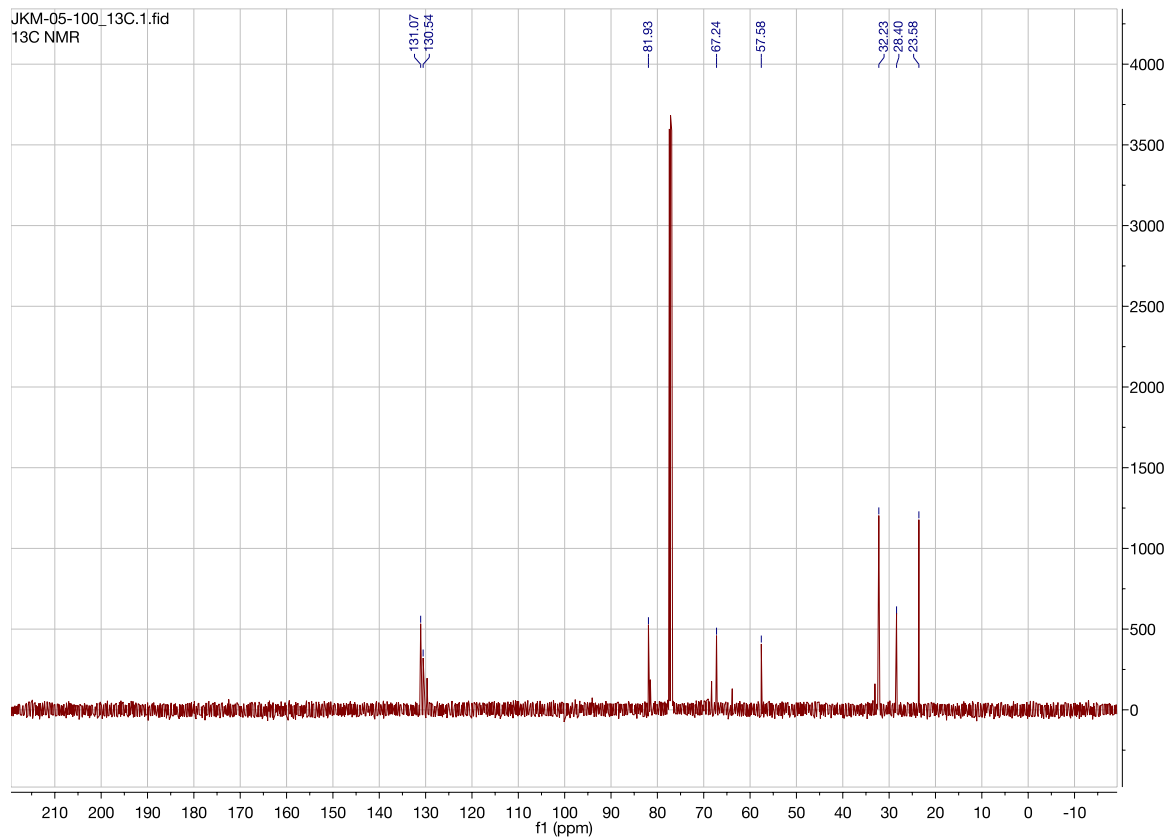

<sup>1</sup>H NMR (CDCl<sub>3</sub>, 500 MHz) and <sup>13</sup>C NMR (CDCl<sub>3</sub>, 126 MHz) of (*E*)-5-((4-methoxybenzyl)oxy)pent-2-en-1-ol (**1i**)

JKM-05-114-2.1.fid

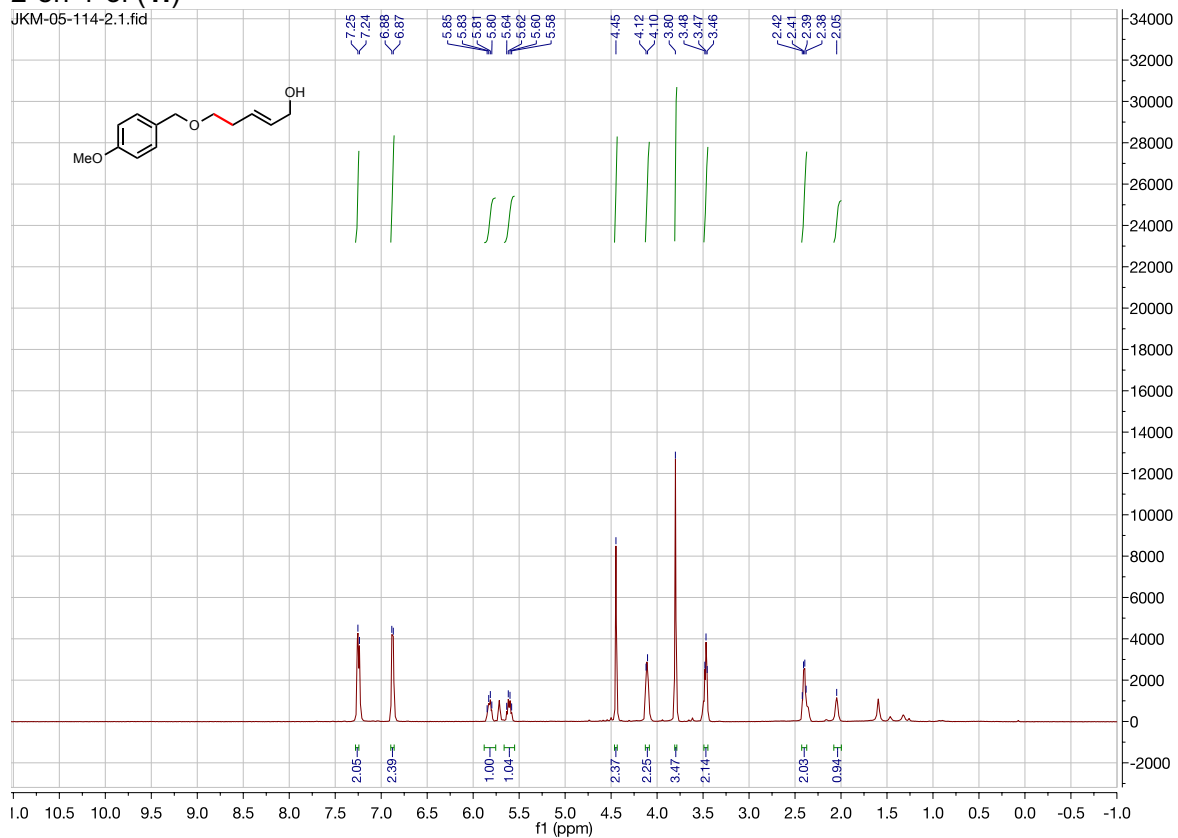

JKM-05-114-2\_13C.1.fid

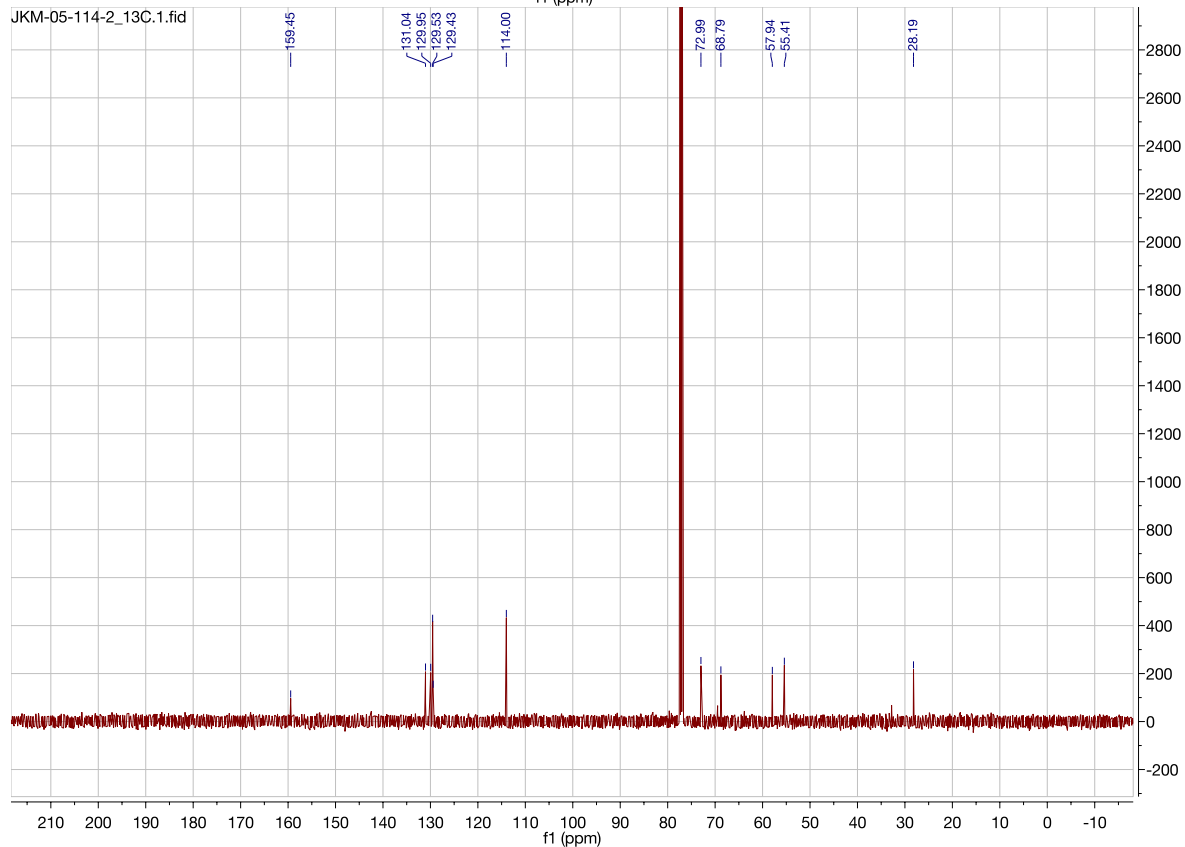

<sup>1</sup>H NMR (CDCl<sub>3</sub>, 500 MHz) and <sup>13</sup>C NMR (CDCl<sub>3</sub>, 126 MHz) of (E)-5-(((1R,5S)-6,6-dimethylbicyclo[3.1.1]hept-2-en-2-yl)methoxy)pent-2-en-1-ol (**1j**)

JKM-05-150-2.1.fid  
1H NMR

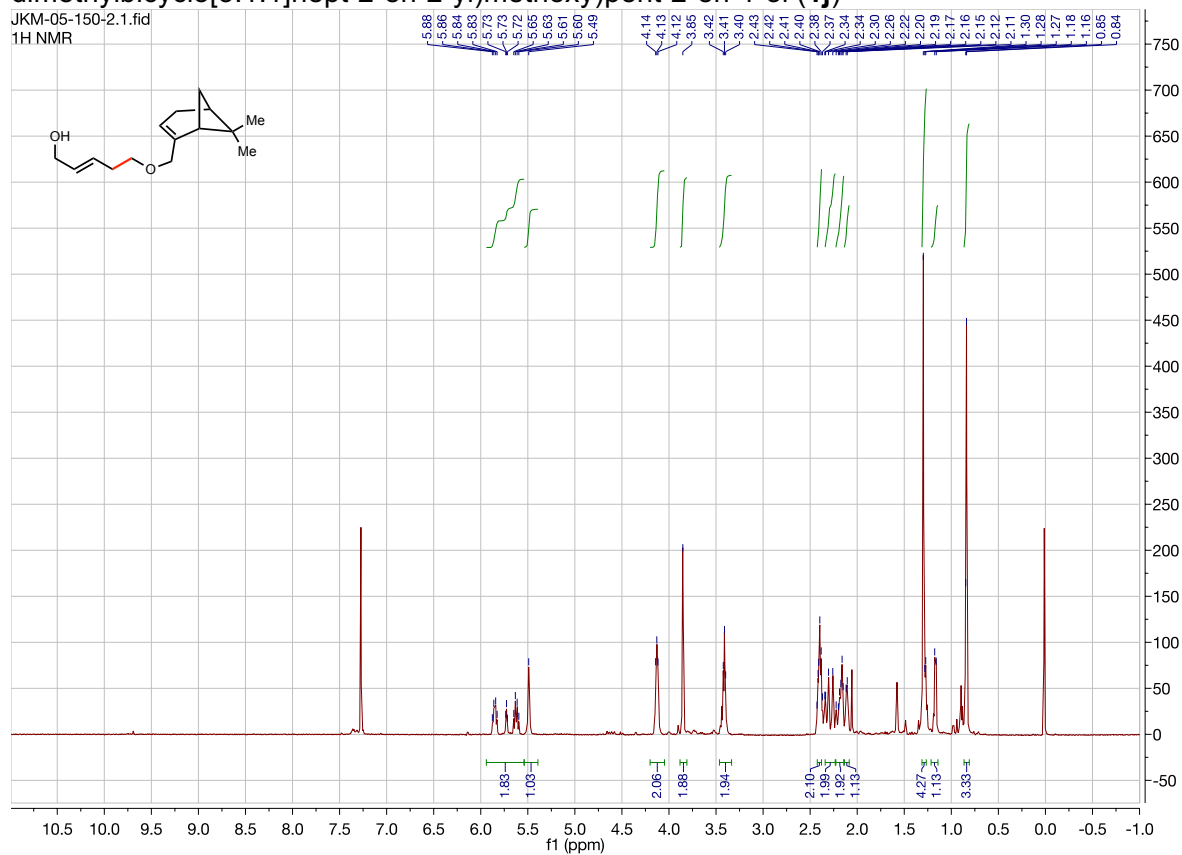

JKM-05-110\_13C.1.fid  
13C NMR

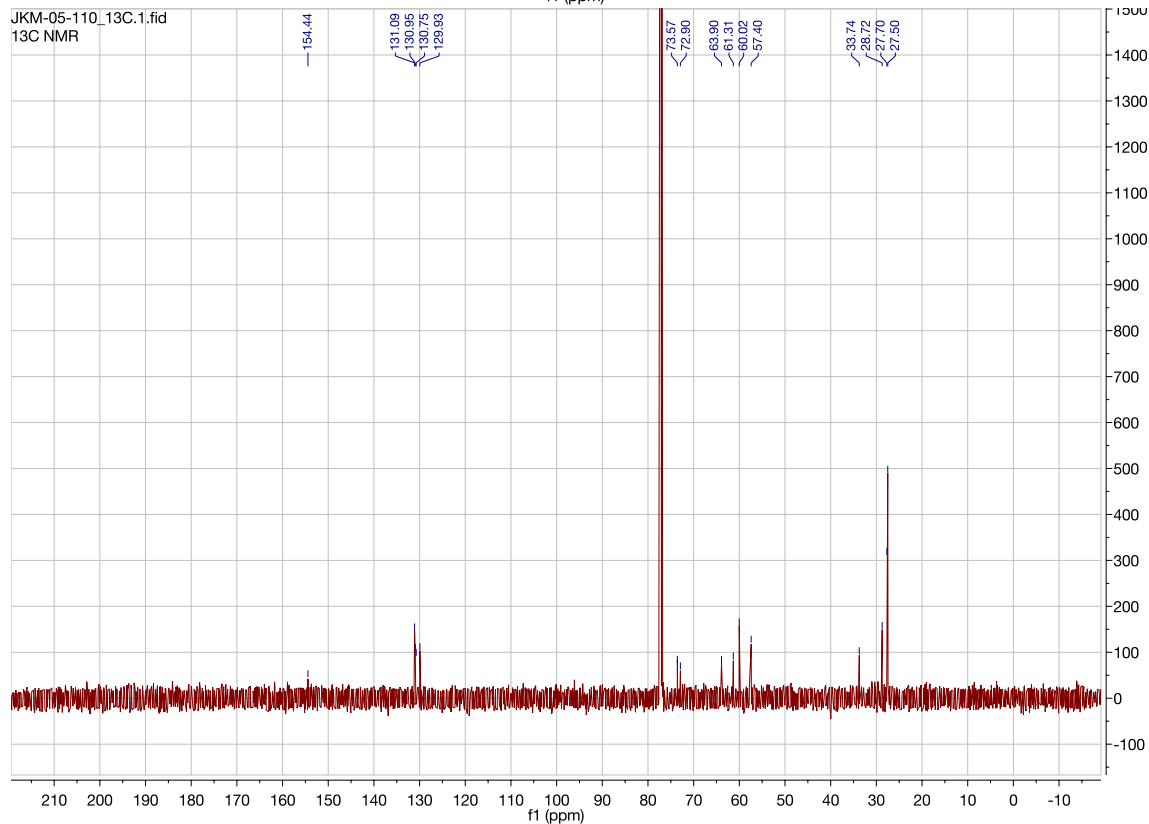

<sup>1</sup>H NMR (CDCl<sub>3</sub>, 500 MHz) and <sup>13</sup>C NMR (CDCl<sub>3</sub>, 126 MHz) of (*E*)-5-(*tert*-Butoxy)pent-2-en-1-ol (**1k**)

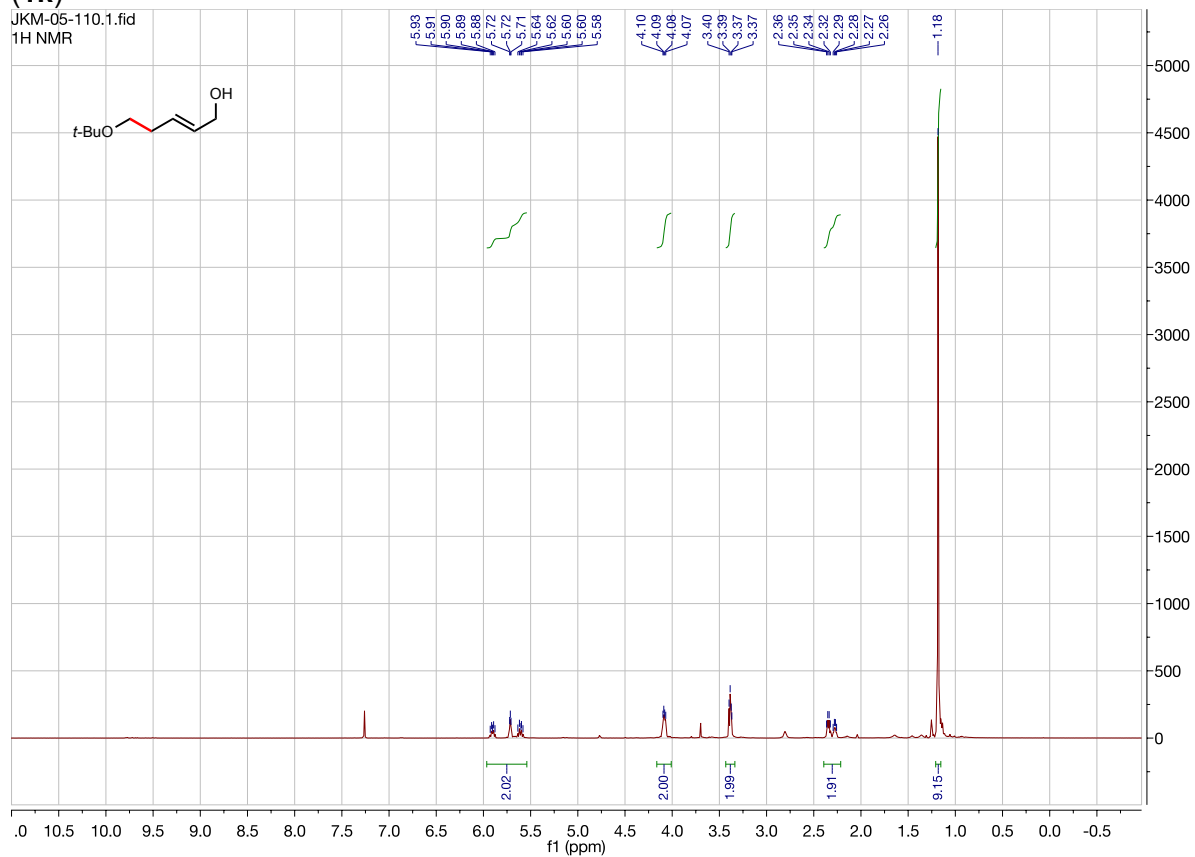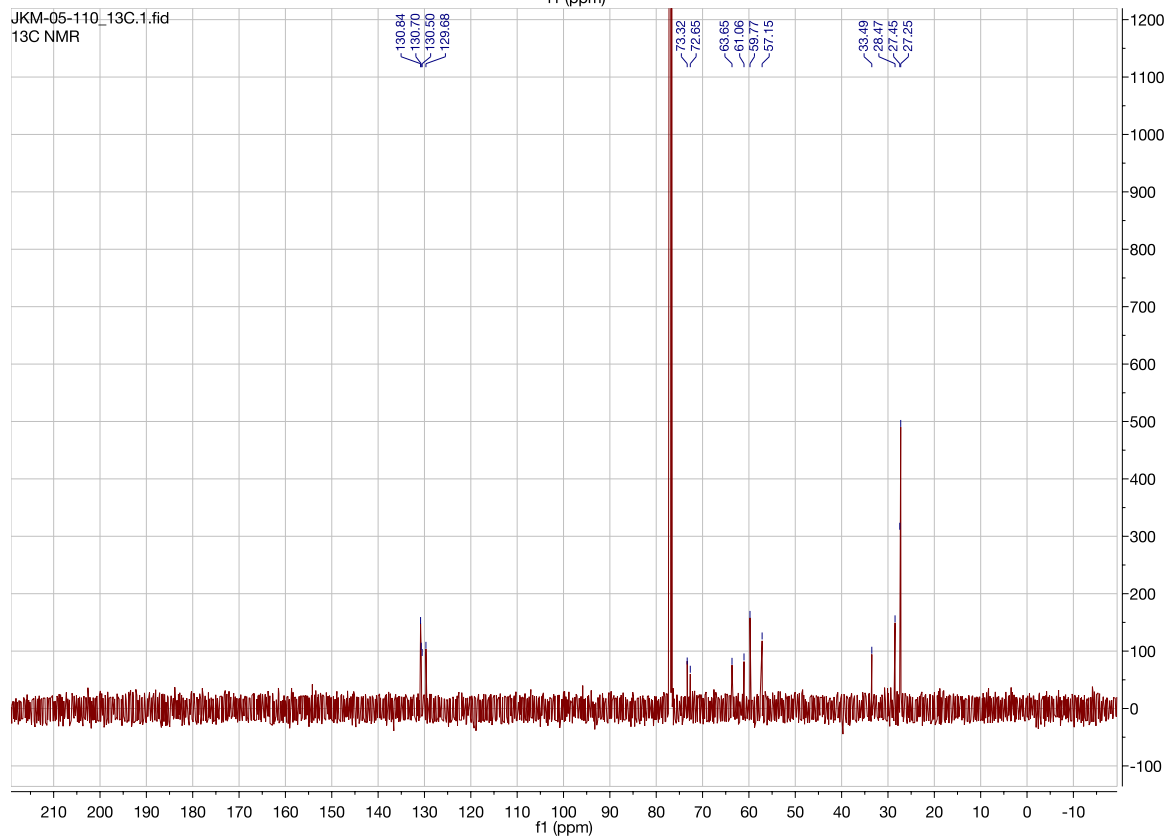

<sup>1</sup>H NMR (CDCl<sub>3</sub>, 500 MHz) and <sup>13</sup>C NMR (CDCl<sub>3</sub>, 126 MHz) of (Z)-2-methyl-5-phenylpent-2-en-1-ol (**2f**)

JKM-05-126-2.1.fid  
1H NMR

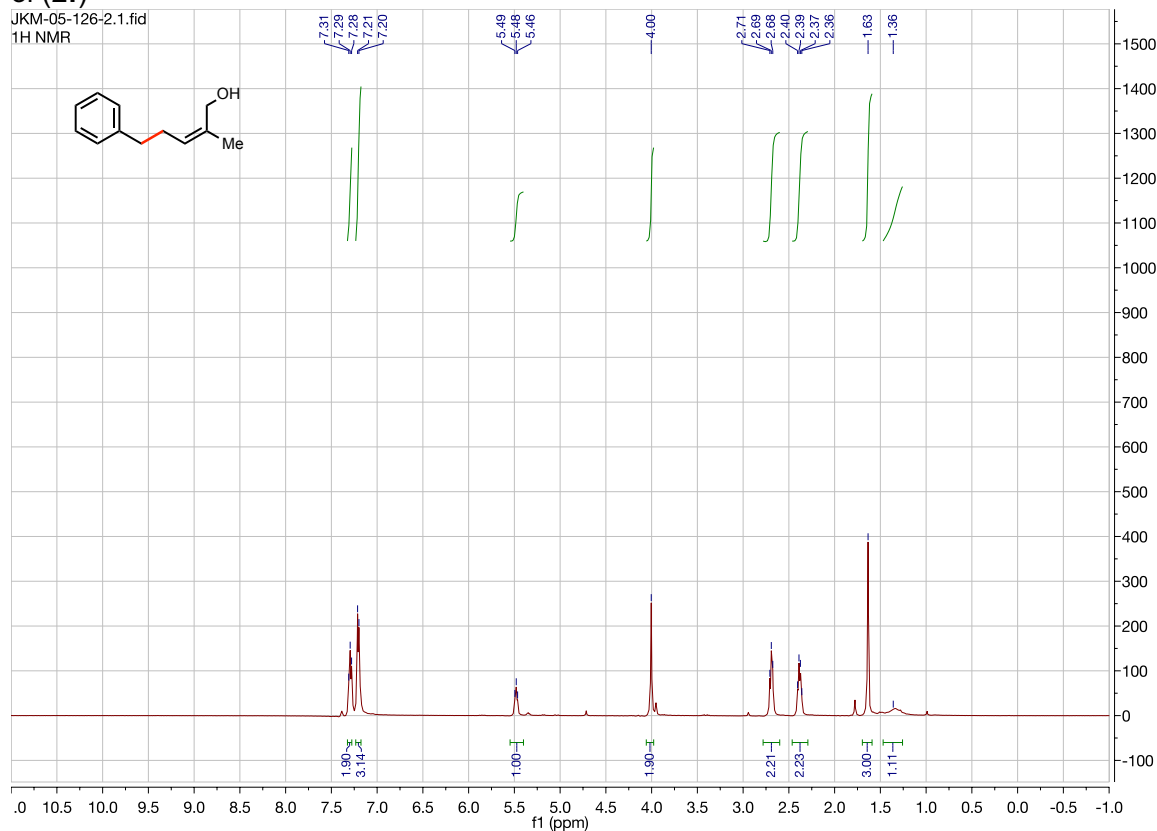

JKM-05-126-2\_13C.1.fid  
13C NMR

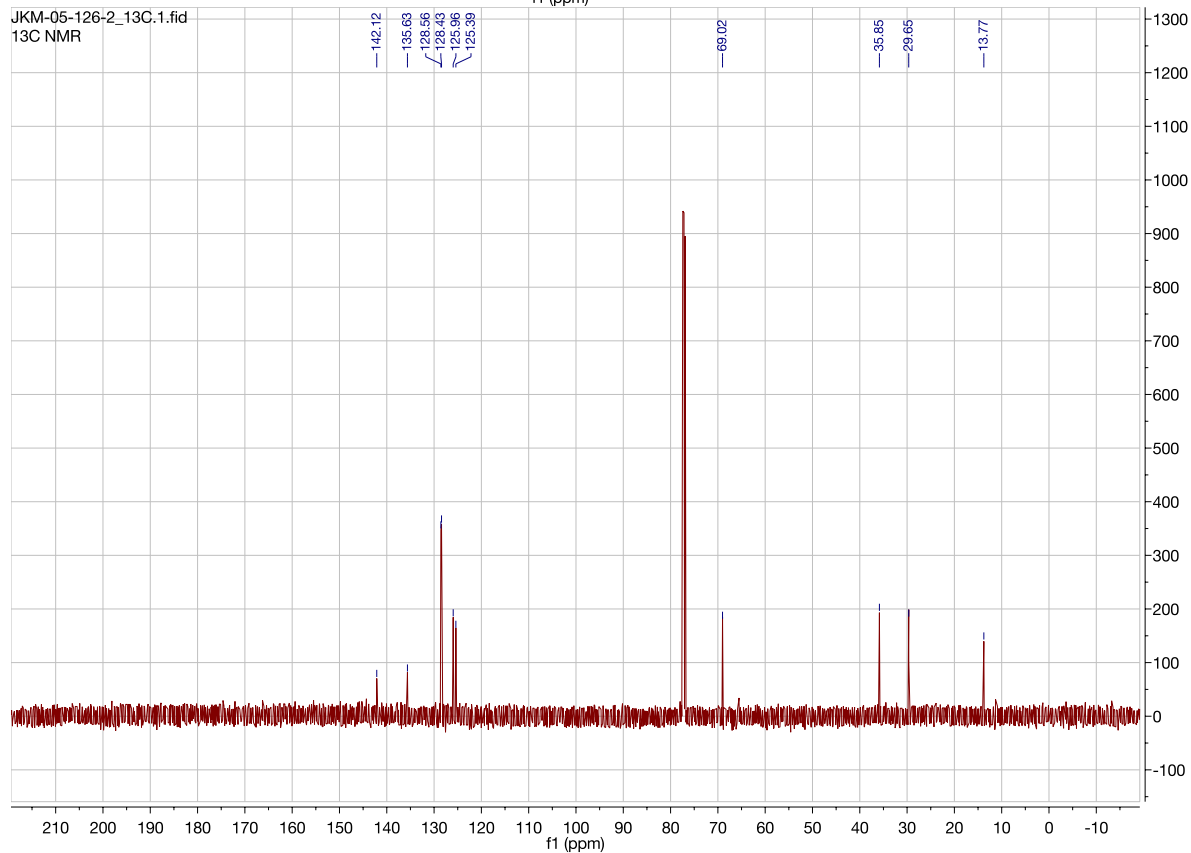

<sup>1</sup>H NMR (CDCl<sub>3</sub>, 500 MHz) and <sup>13</sup>C NMR (CDCl<sub>3</sub>, 126 MHz) of (E)-4-(tetrahydro-2H-pyran-4-yl)but-2-en-1-ol (**2a**)

JKM-09-008-3.1.fid  
1H NMR

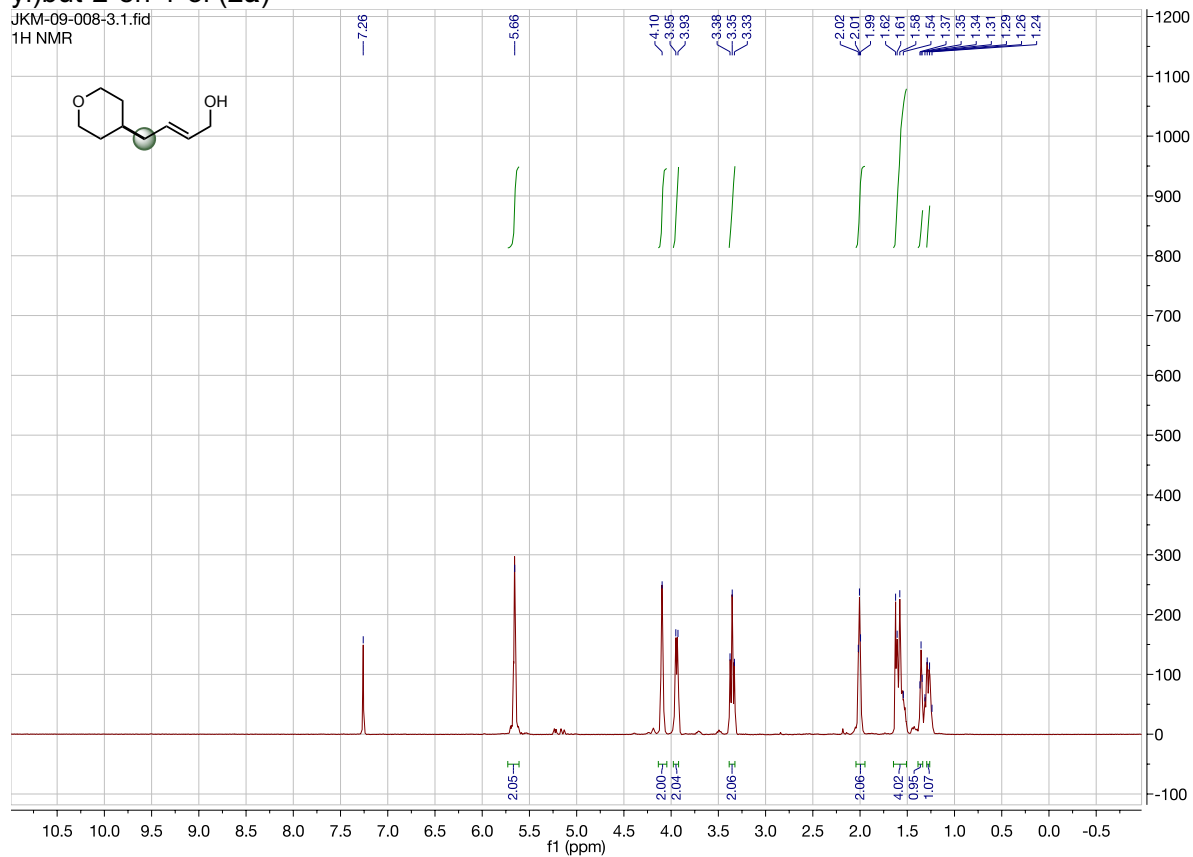

JKM-09-008-3\_13C.1.fid  
13C NMR

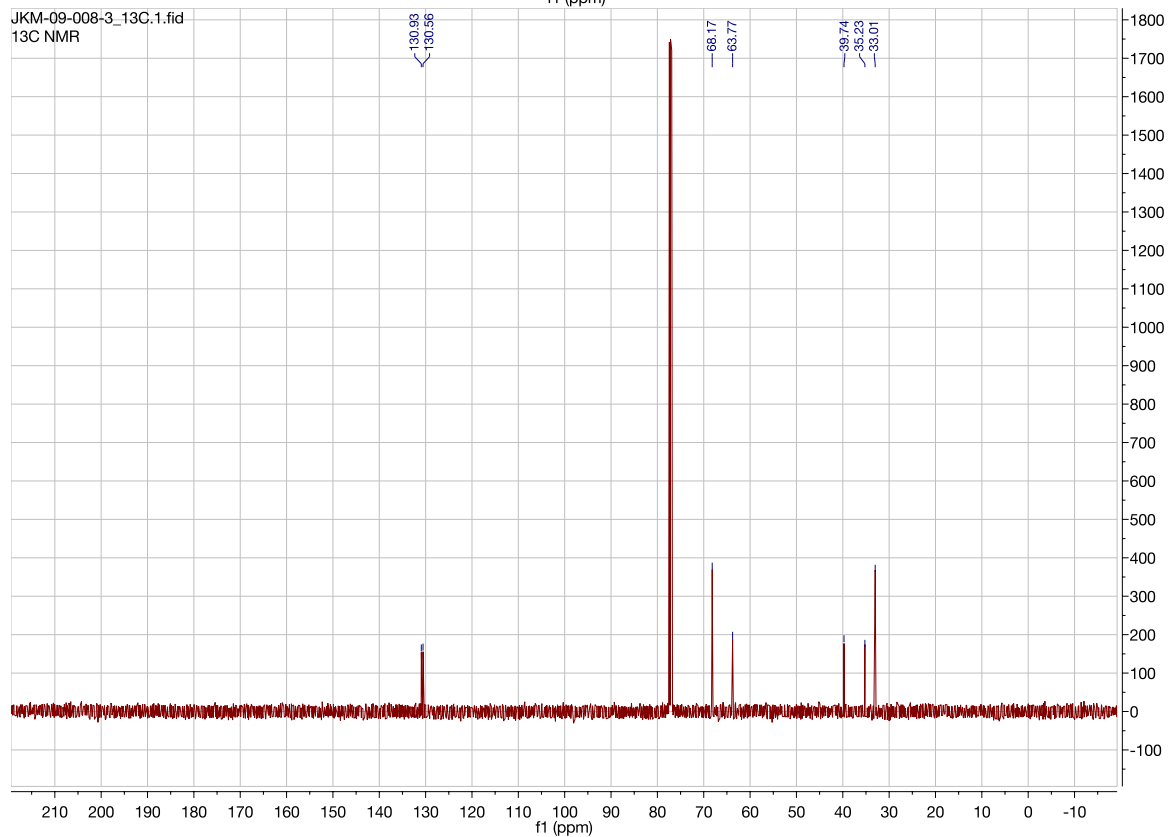

<sup>1</sup>H NMR (CDCl<sub>3</sub>, 500 MHz) and <sup>13</sup>C NMR (CDCl<sub>3</sub>, 126 MHz) of (E)-4-(cyclohex-3-en-1-yl)but-2-en-1-ol (**2c**)

JKM-09-009-1.1.fid  
1H NMR

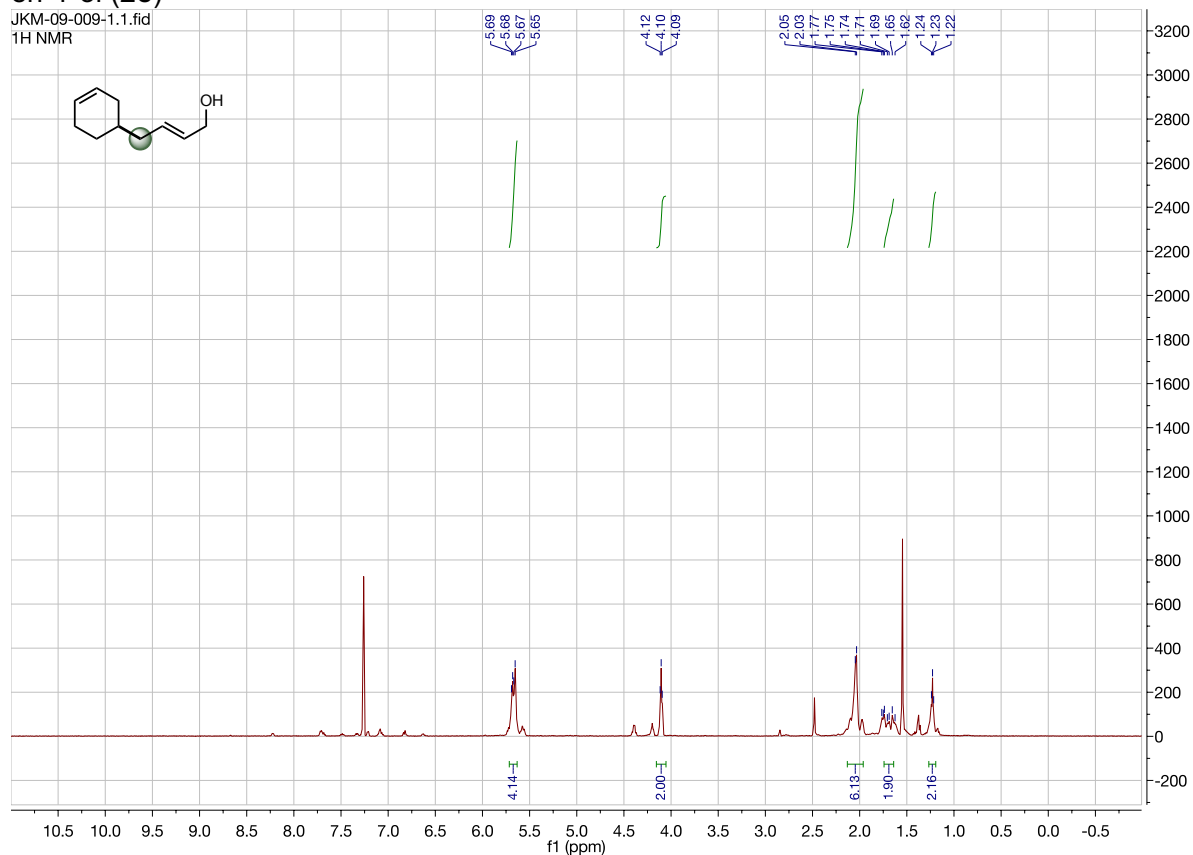

Note: Trace photocatalyst is present in the aryl region (<5%) by integration.

JKM-09-029\_13C.1.fid  
13C NMR

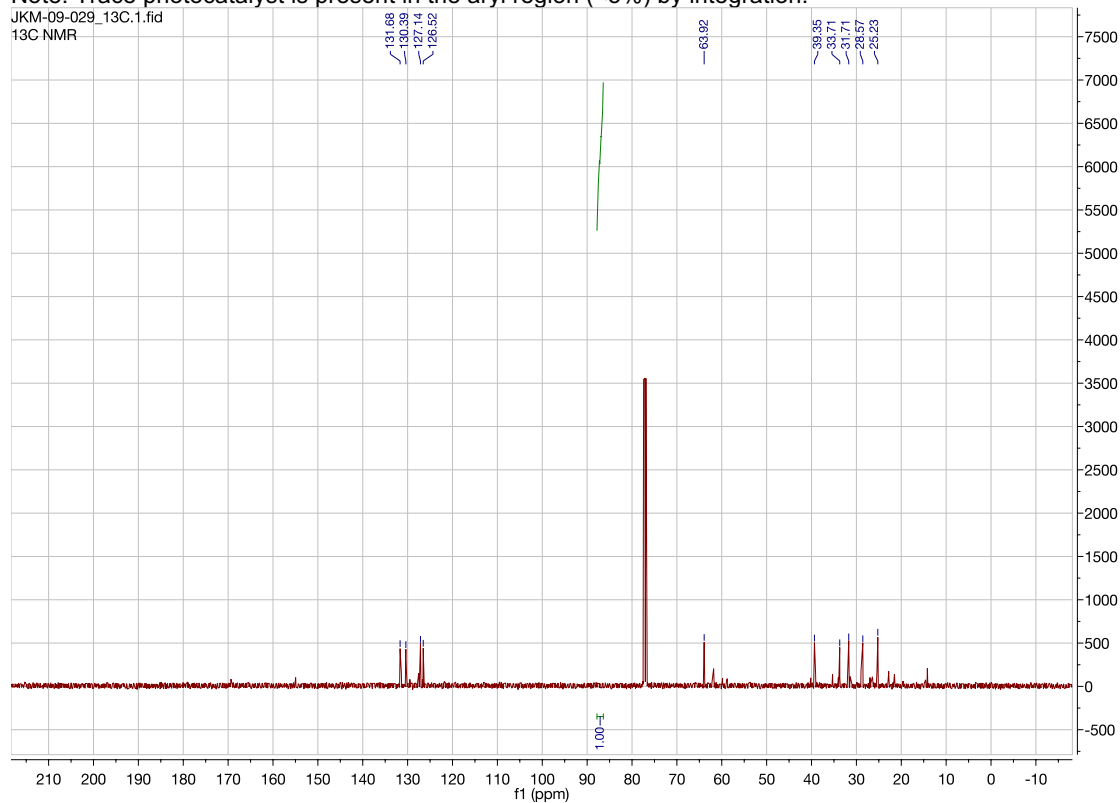

<sup>1</sup>H NMR (CDCl<sub>3</sub>, 500 MHz) and <sup>13</sup>C NMR (CDCl<sub>3</sub>, 126 MHz) of (*E*)-6-(benzo[d][1,3]dioxol-5-yl)-5-methylhex-2-en-1-ol (**2d**)

Note: Major E isomer.

JKM-09-017 check.1.fid

<sup>1</sup>H NMR

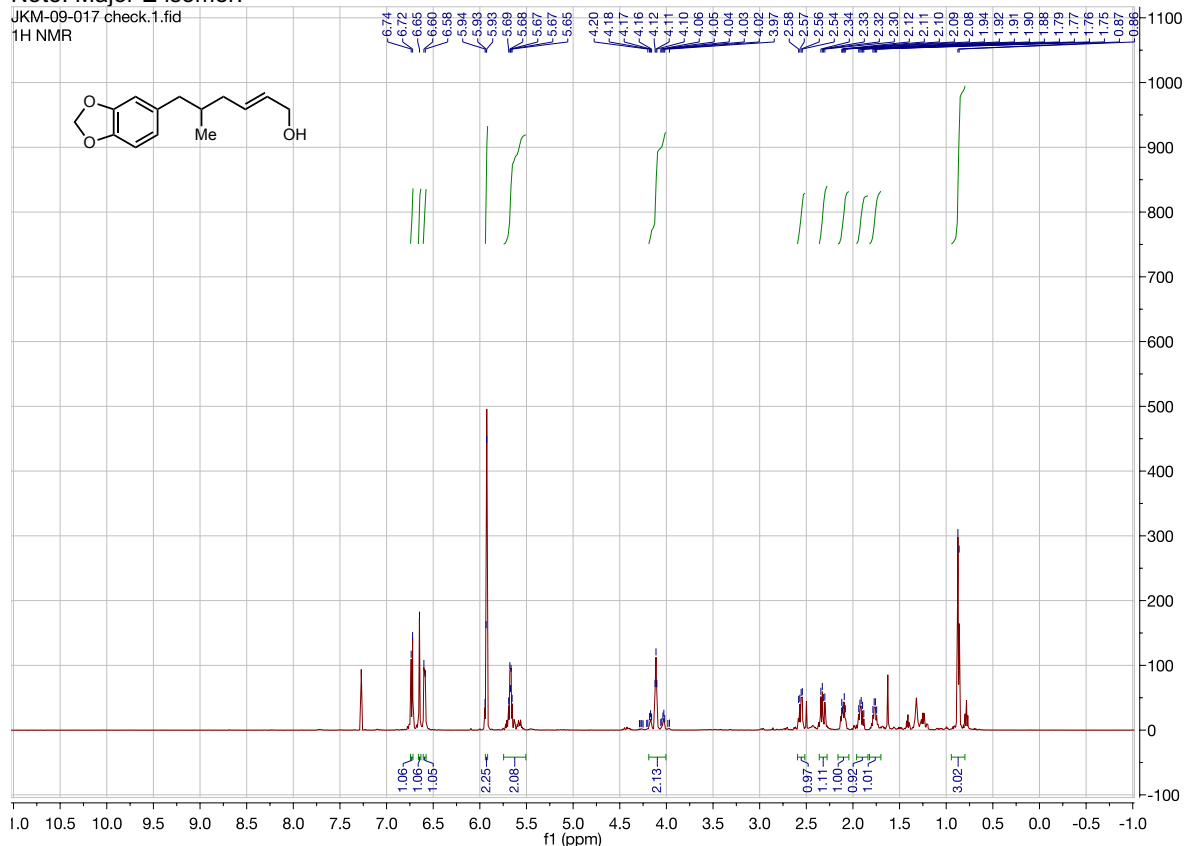

JKM-09-017-1\_13C.1.fid

<sup>13</sup>C NMR

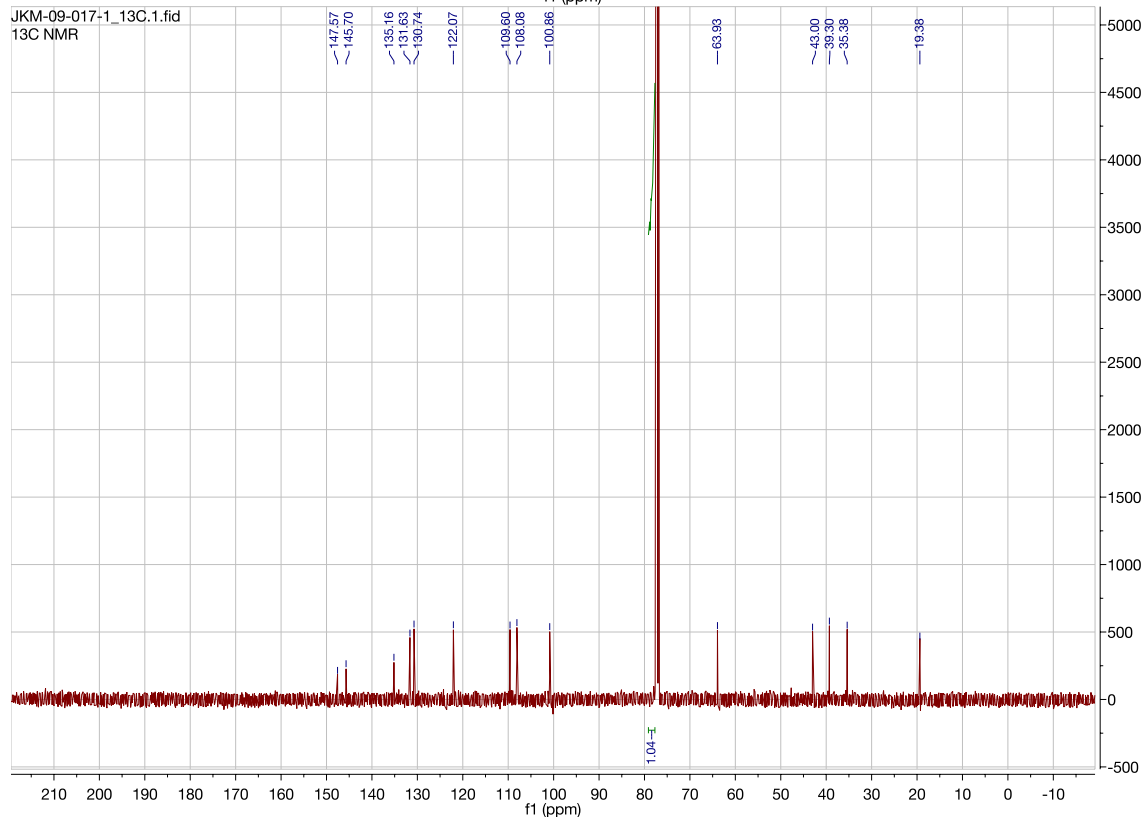



<sup>1</sup>H NMR (CDCl<sub>3</sub>, 500 MHz) and <sup>13</sup>C NMR (CDCl<sub>3</sub>, 126 MHz) of benzyl (E)-4-(4-hydroxybut-2-en-1-yl)piperidine-1-carboxylate (**2e**)

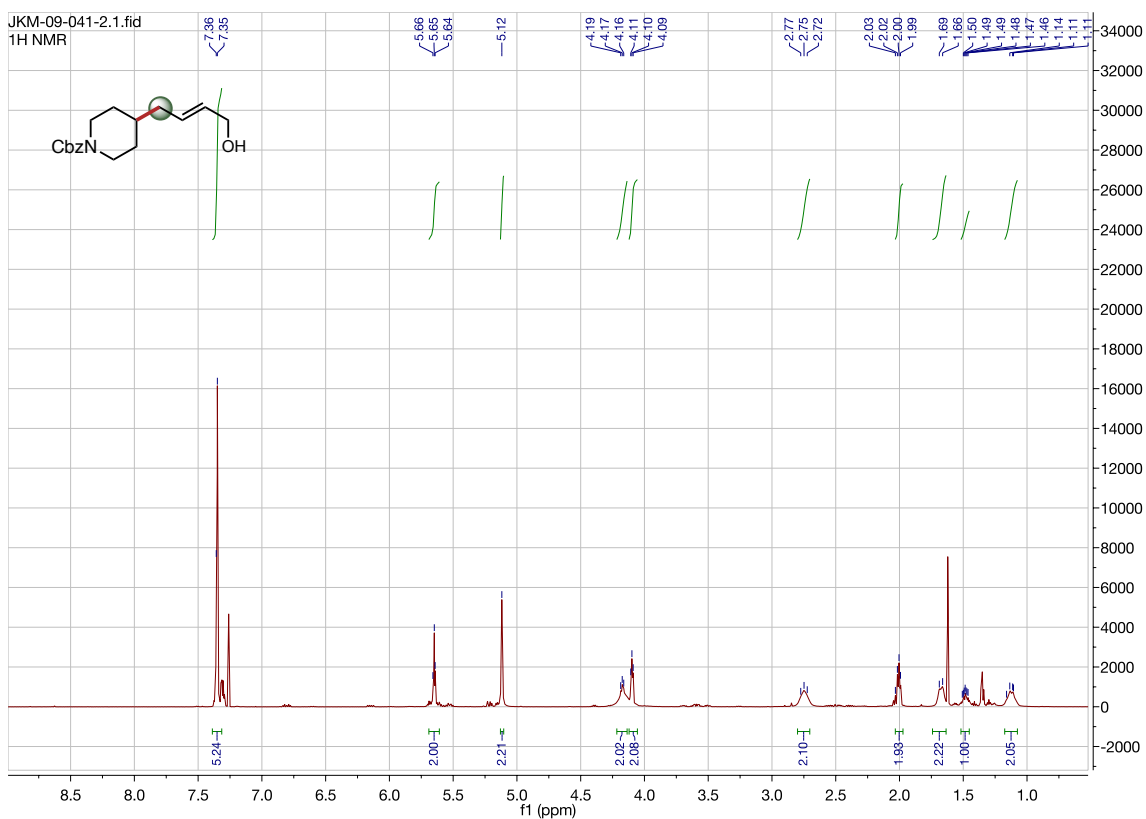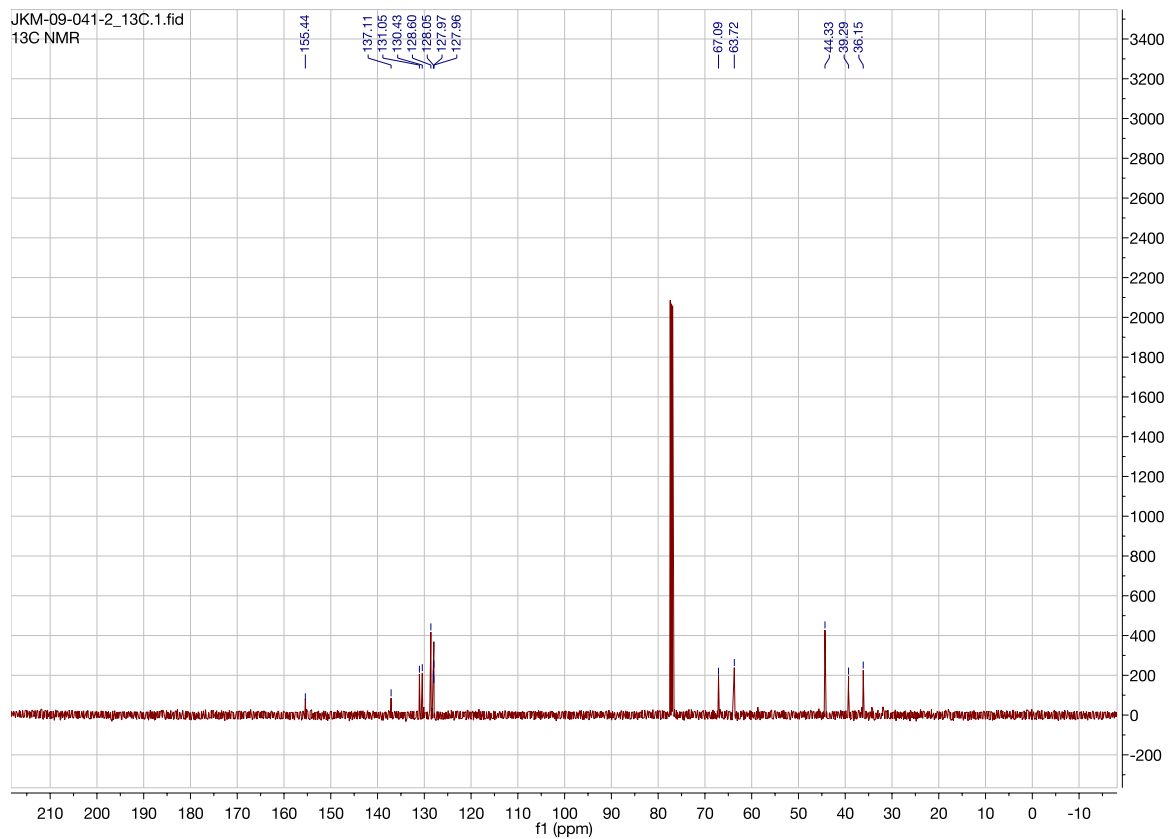

<sup>1</sup>H NMR (CDCl<sub>3</sub>, 500 MHz) and <sup>13</sup>C NMR (CDCl<sub>3</sub>, 126 MHz) of (*E*)-2-methyl-4-(tetrahydro-2H-pyran-4-yl)but-2-en-1-ol (**2g**)

JKM-09-010-4.1.fid  
1H NMR

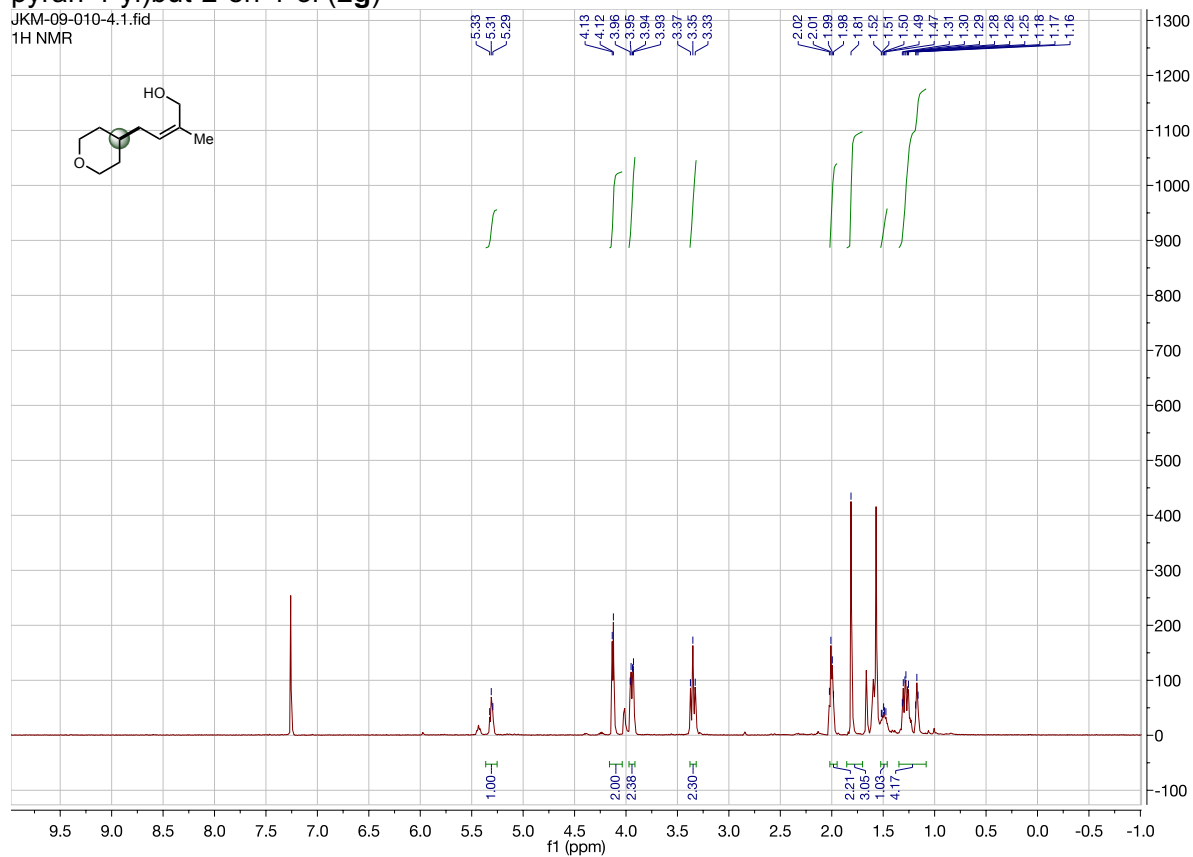

JKM\_9\_10\_H\_CDCl3\_13C\_Cryoprobe.1.fid  
JKM\_9\_10\_H\_CDCl3\_13C\_Cryoprobe

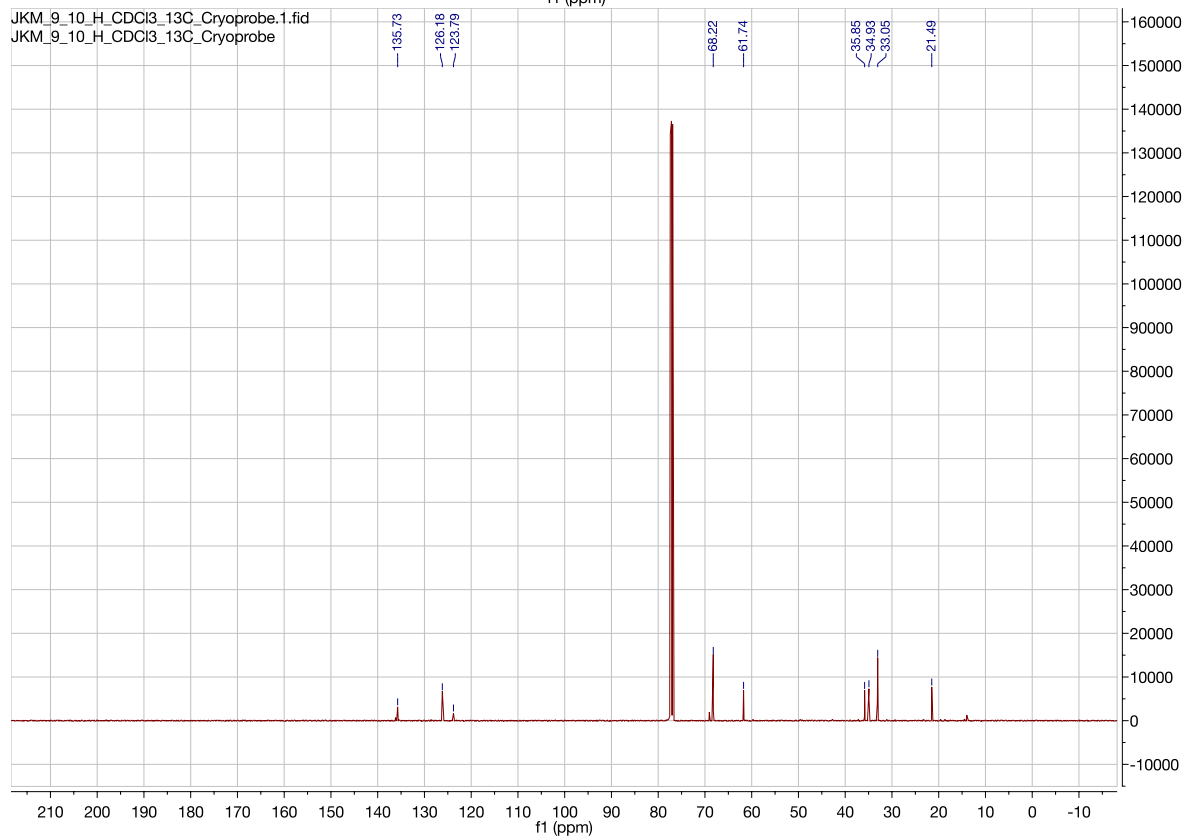

<sup>1</sup>H NMR (CDCl<sub>3</sub>, 500 MHz) and <sup>13</sup>C NMR (CDCl<sub>3</sub>, 126 MHz) of (*E*)-6-(benzo[d][1,3]dioxol-5-yl)-2,5-dimethylhex-2-en-1-ol (**2h**)

JKM-09-019-2.1.fid  
1H NMR

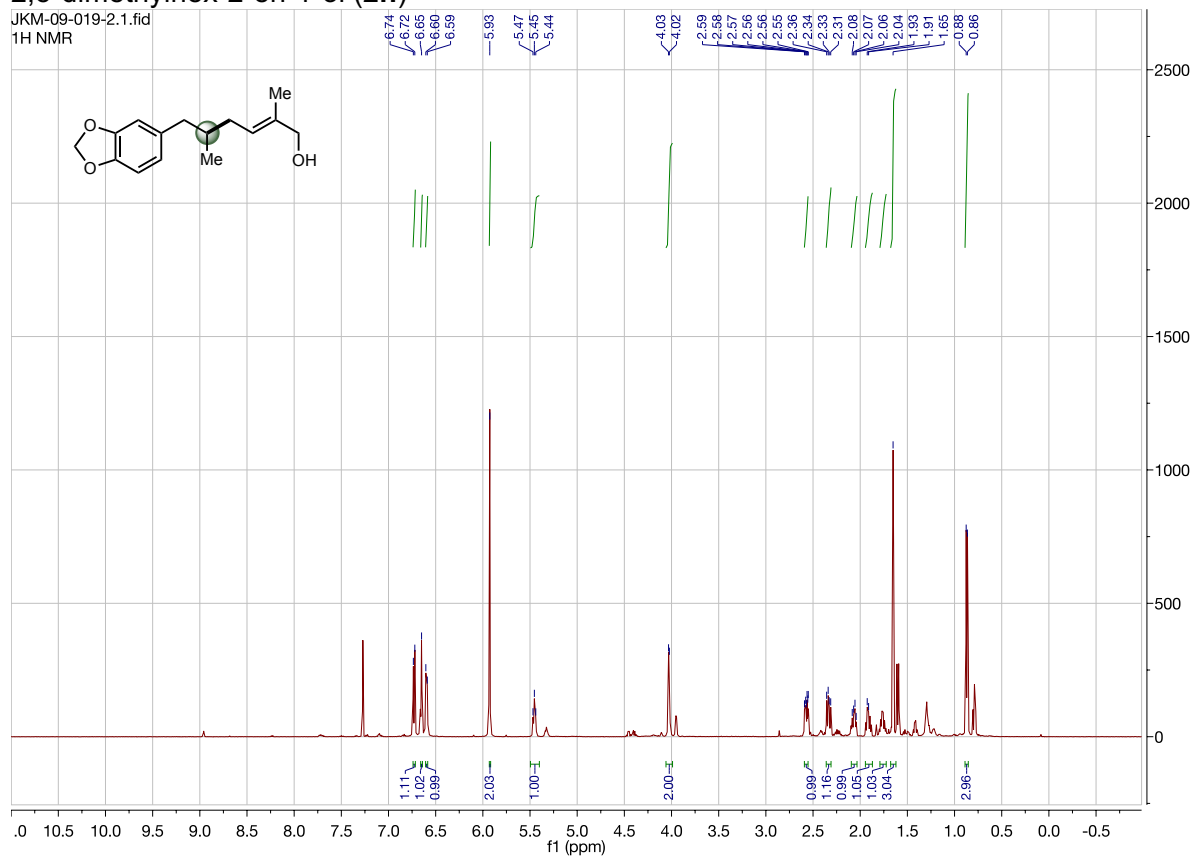

JKM-09-019-2\_13C.1.fid  
13C NMR

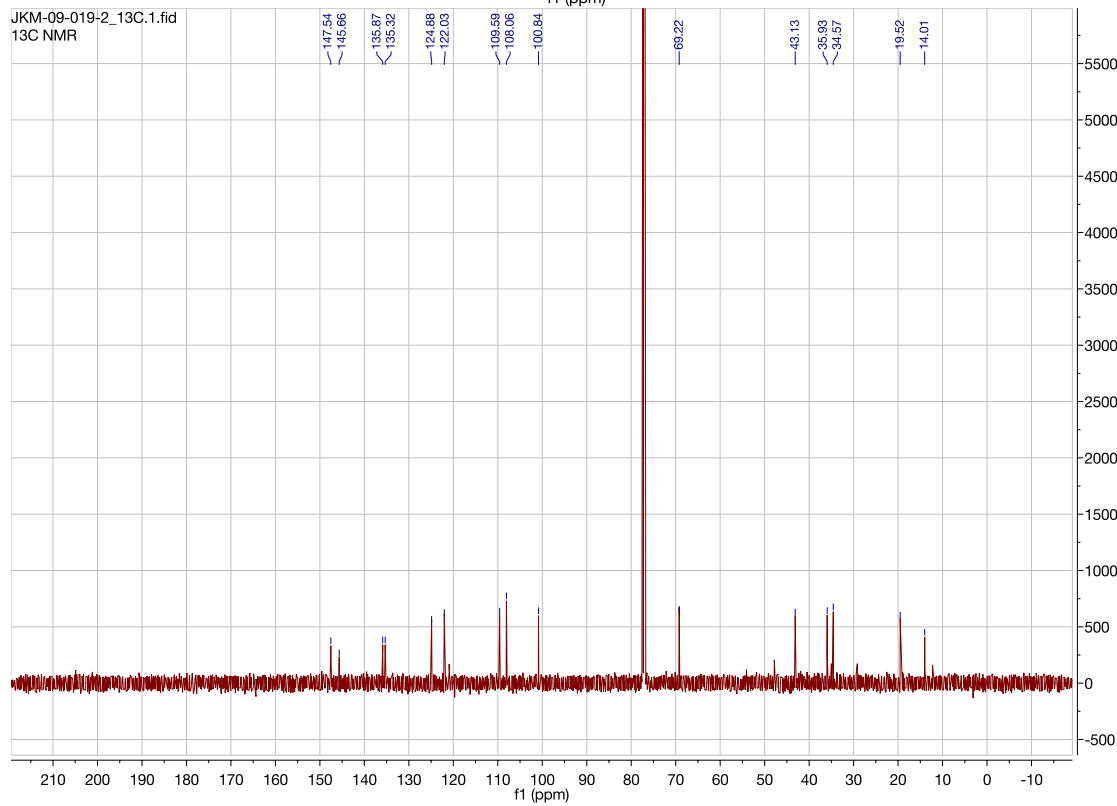

<sup>1</sup>H NMR (CDCl<sub>3</sub>, 500 MHz) and <sup>13</sup>C NMR (CDCl<sub>3</sub>, 126 MHz) of (*E*)-4-((3*a*S,5*R*,5*a*R,8*a*R,8*b*S)-2,2,7,7-tetramethyltetrahydro-5H-bis([1,3]dioxolo)[4,5-*b*:4',5'-*d*]pyran-5-yl)but-2-en-1-ol (**2i**)

JKM-09-018\_check\_1.1.fid  
1H NMR

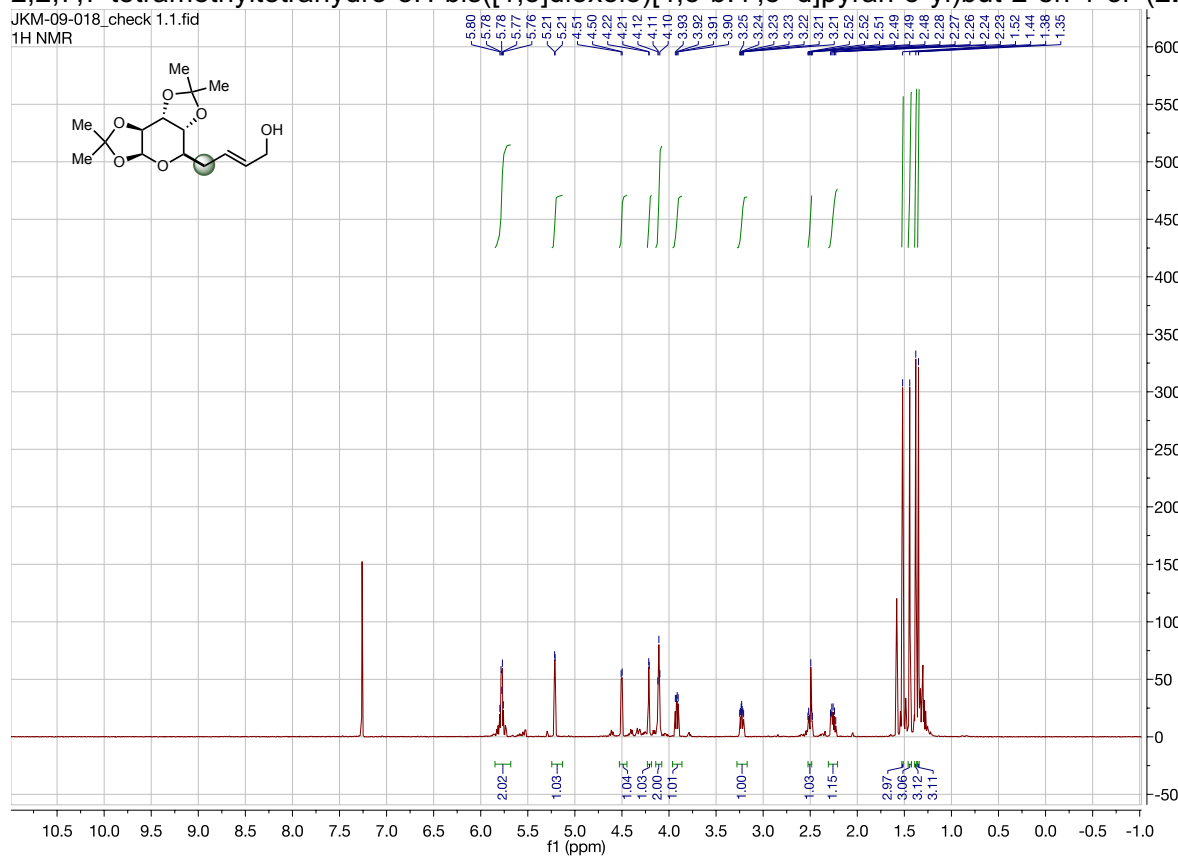

JKM-09-018\_check\_13C.1.fid  
13C NMR

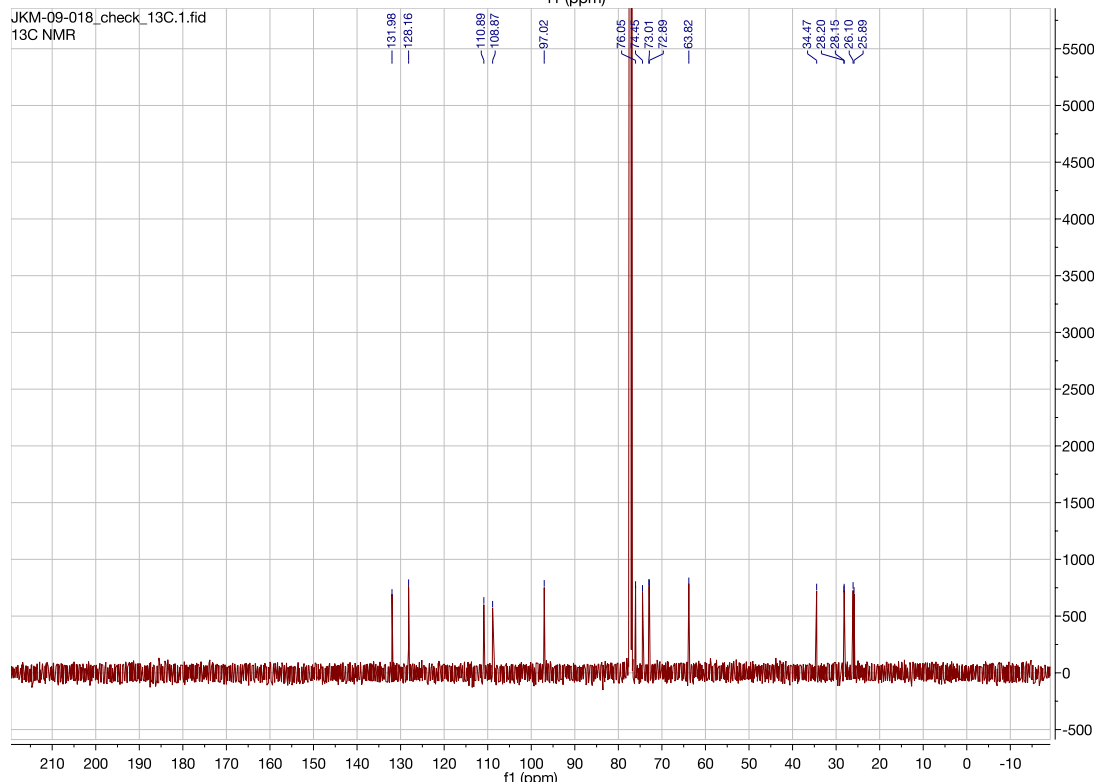

Note: Major isomer highlighted in both proton and carbon NMR.

<sup>1</sup>H NMR (CDCl<sub>3</sub>, 500 MHz) and <sup>13</sup>C NMR (CDCl<sub>3</sub>, 126 MHz) of (*E*)-2-methyl-4-((3*a*S,5*R*,5*a*R,8*a*R,8*b*S)-2,2,7,7-tetramethyltetrahydro-5H-bis([1,3]dioxolo)[4,5-*b*:4',5'-*d*]pyran-5-yl)but-2-en-1-ol (**2j**)

JKM-09-020-3 check.1.fid  
1H NMR

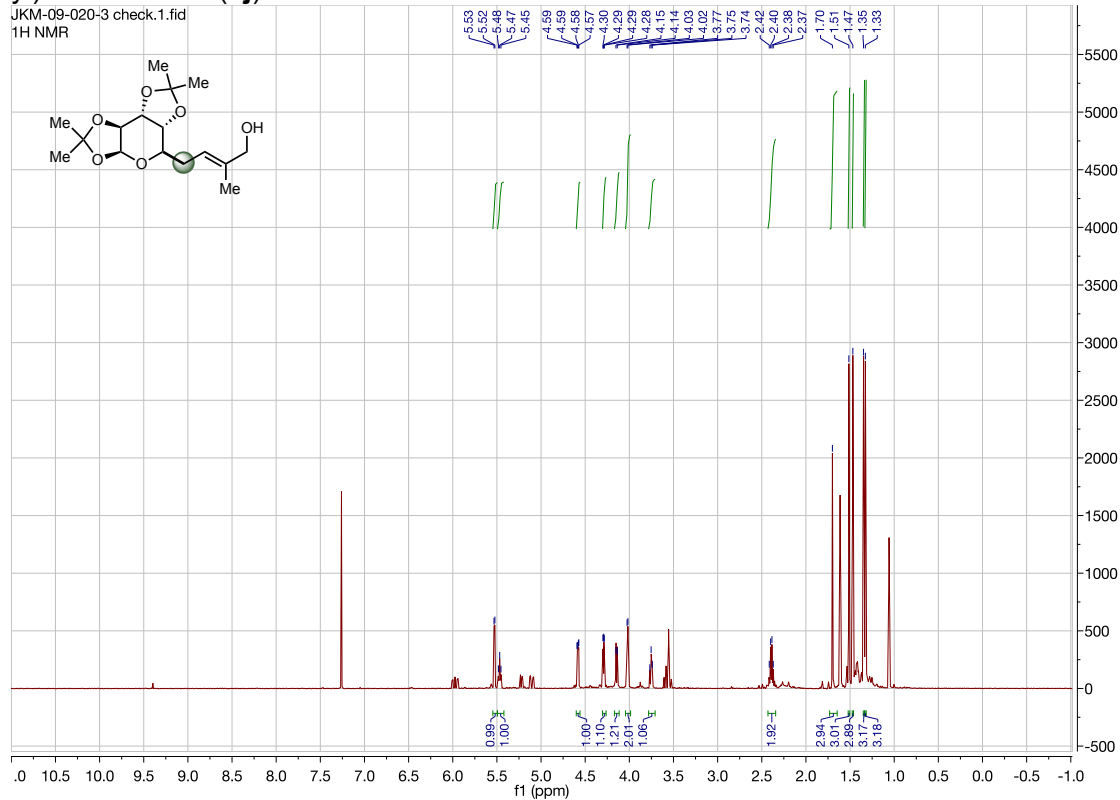

JKM-09-020-3 check.13C.1.fid  
13C NMR

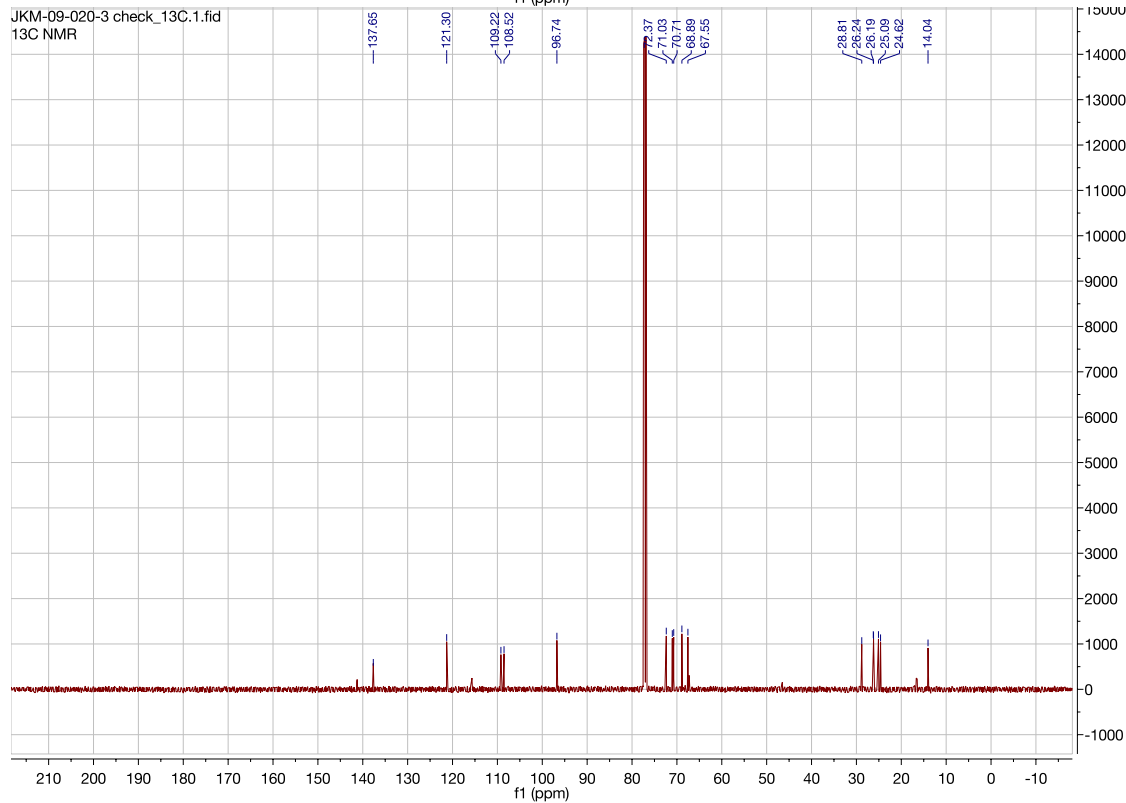

Note: Major isomer highlighted in both proton and carbon NMR.

<sup>1</sup>H NMR (CDCl<sub>3</sub>, 500 MHz) and <sup>13</sup>C NMR (CDCl<sub>3</sub>, 126 MHz) of (*E*)-2-methyl-5-phenylhex-2-en-1-ol (**2k**)

JKM-09-032-1.1.fid  
1H NMR

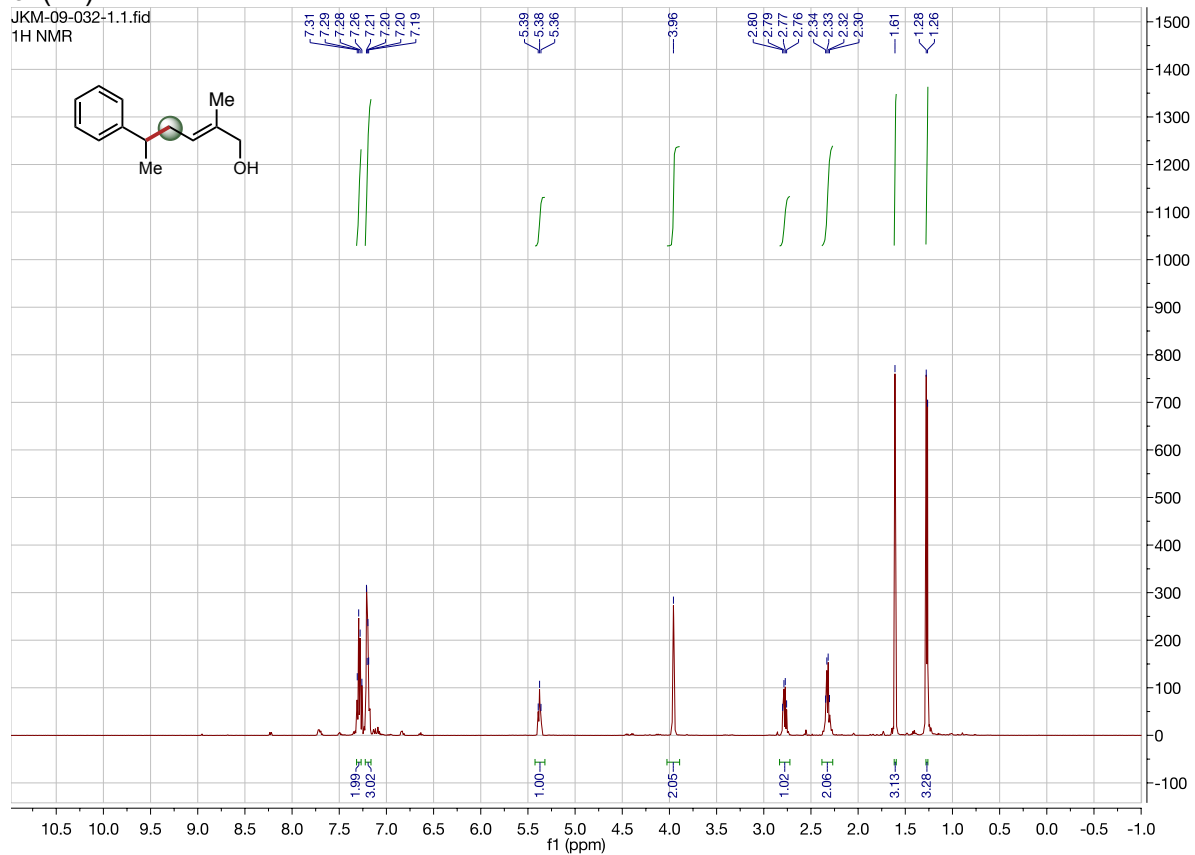

JKM-09-032-1\_13C.1.fid  
13C NMR

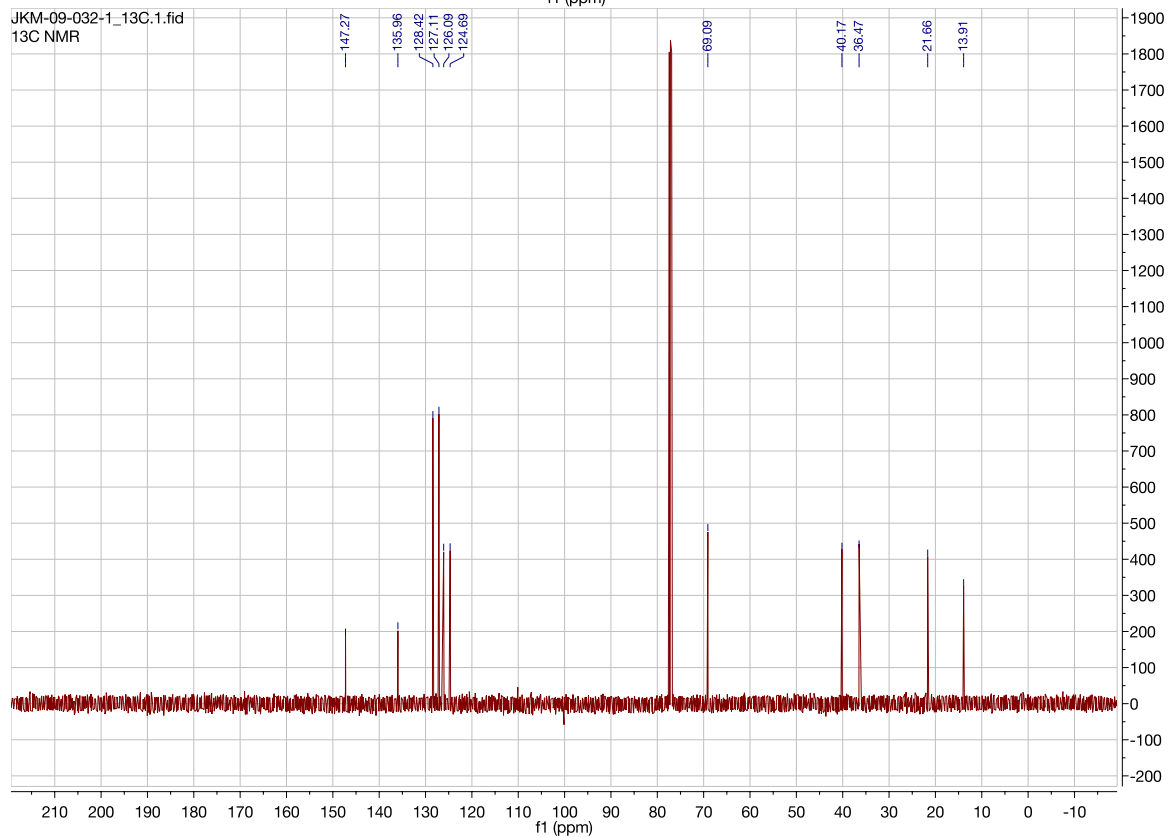

<sup>1</sup>H NMR (CDCl<sub>3</sub>, 500 MHz) and <sup>13</sup>C NMR (CDCl<sub>3</sub>, 126 MHz) of (*E*)-2-methyl-4-(tetrahydro-2H-pyran-4-yl)oct-2-en-1-ol (**2I**)

JKM-09-033-2.1.fid  
1H NMR

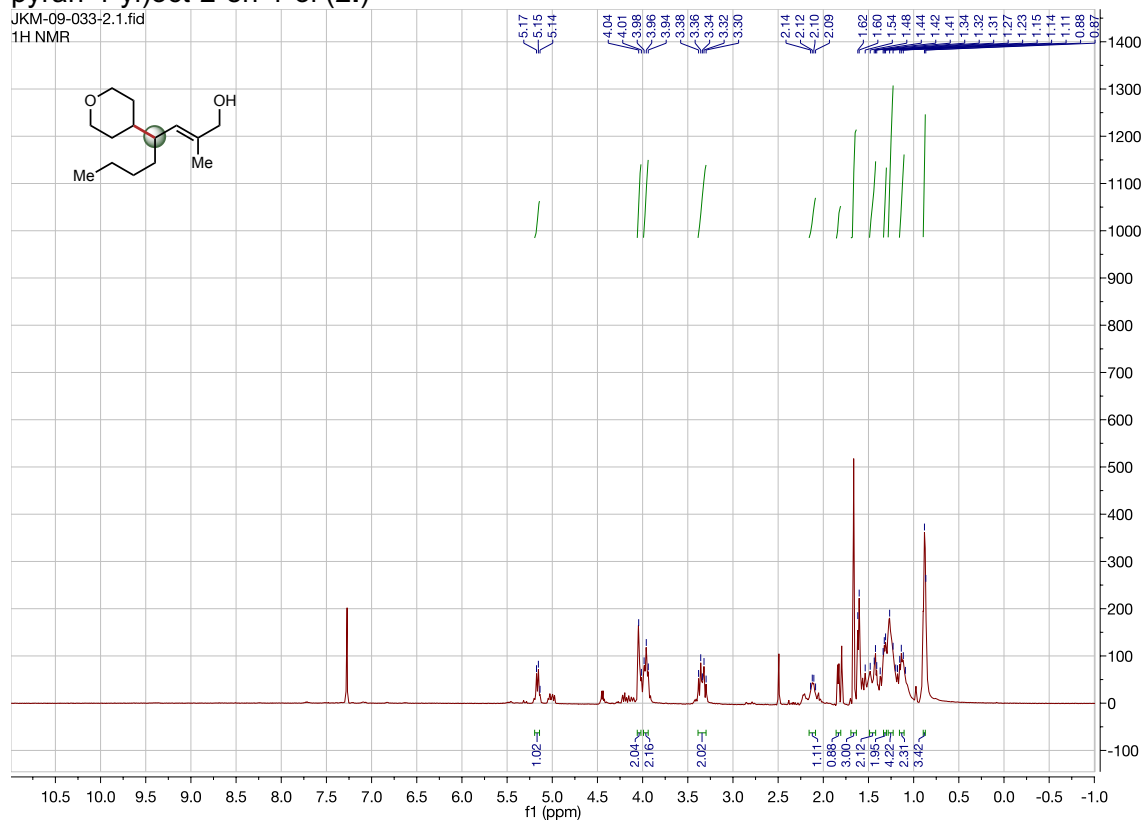

JKM-09-033-2\_13C.1.fid  
13C NMR

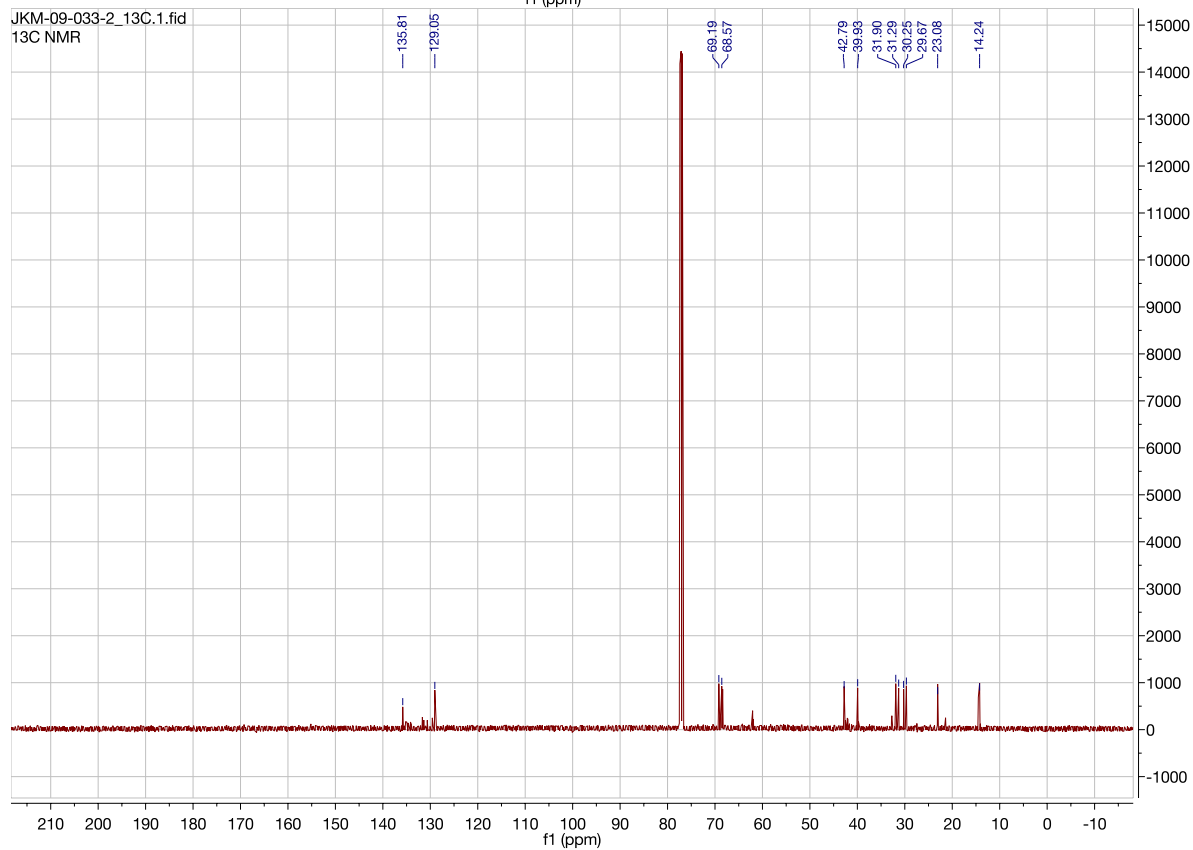

<sup>1</sup>H NMR (CDCl<sub>3</sub>, 500 MHz) and <sup>13</sup>C NMR (CDCl<sub>3</sub>, 126 MHz) of (3*R*,5*R*,5*a*S,8*a*S,8*b*R)-5-Allyl-2,2,7,7-tetramethyltetrahydro-5H-bis([1,3]dioxolo)[4,5-*b*:4',5'-*d*]pyran (**4a**)

JKM-07-216-1\_1.1.fid  
1H NMR

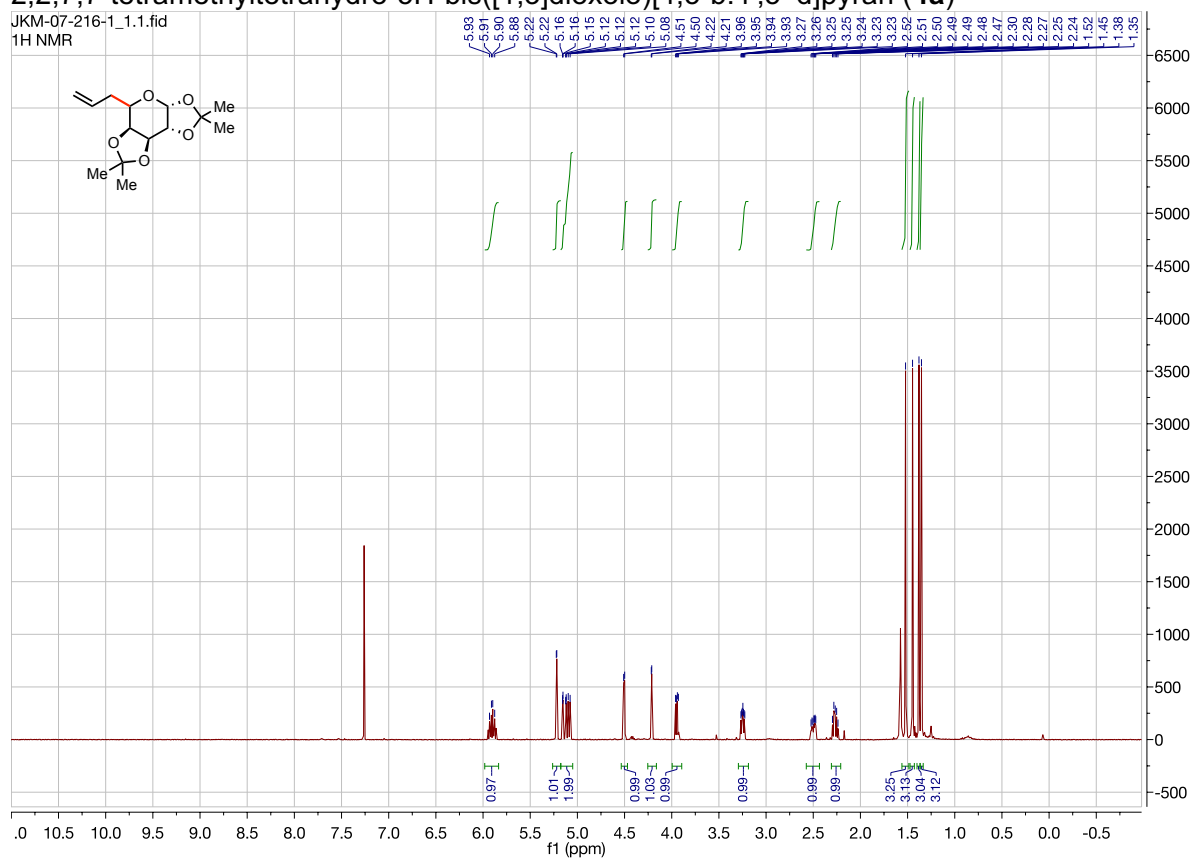

JKM-07-216-1\_1\_13C.1.fid  
13C NMR

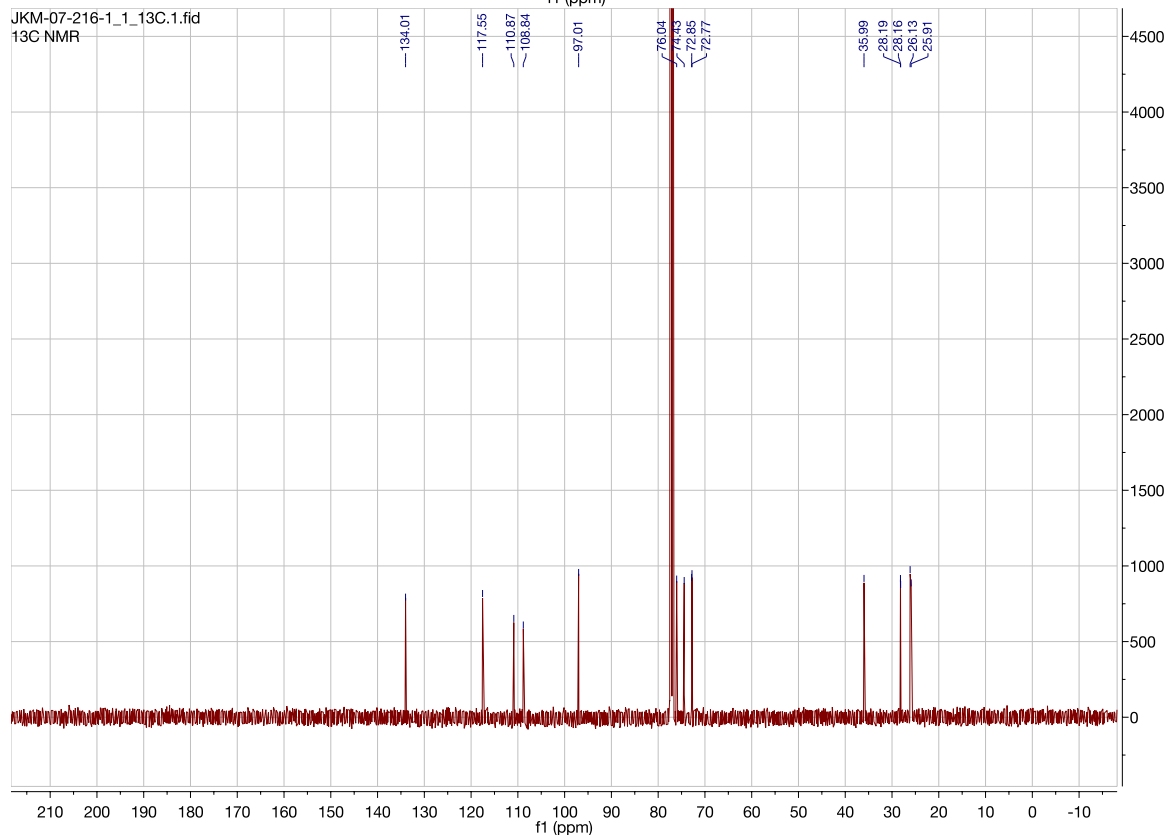



<sup>1</sup>H NMR (CDCl<sub>3</sub>, 500 MHz) and <sup>13</sup>C NMR (CDCl<sub>3</sub>, 126 MHz) of (3*aR*,4*R*,6*R*,6*aR*)-4-allyl-6-methoxy-2,2-dimethyltetrahydrofuro[3,4-*d*][1,3]dioxole (**4b**)

JKM-07-204-1.2.fid  
1H NMR

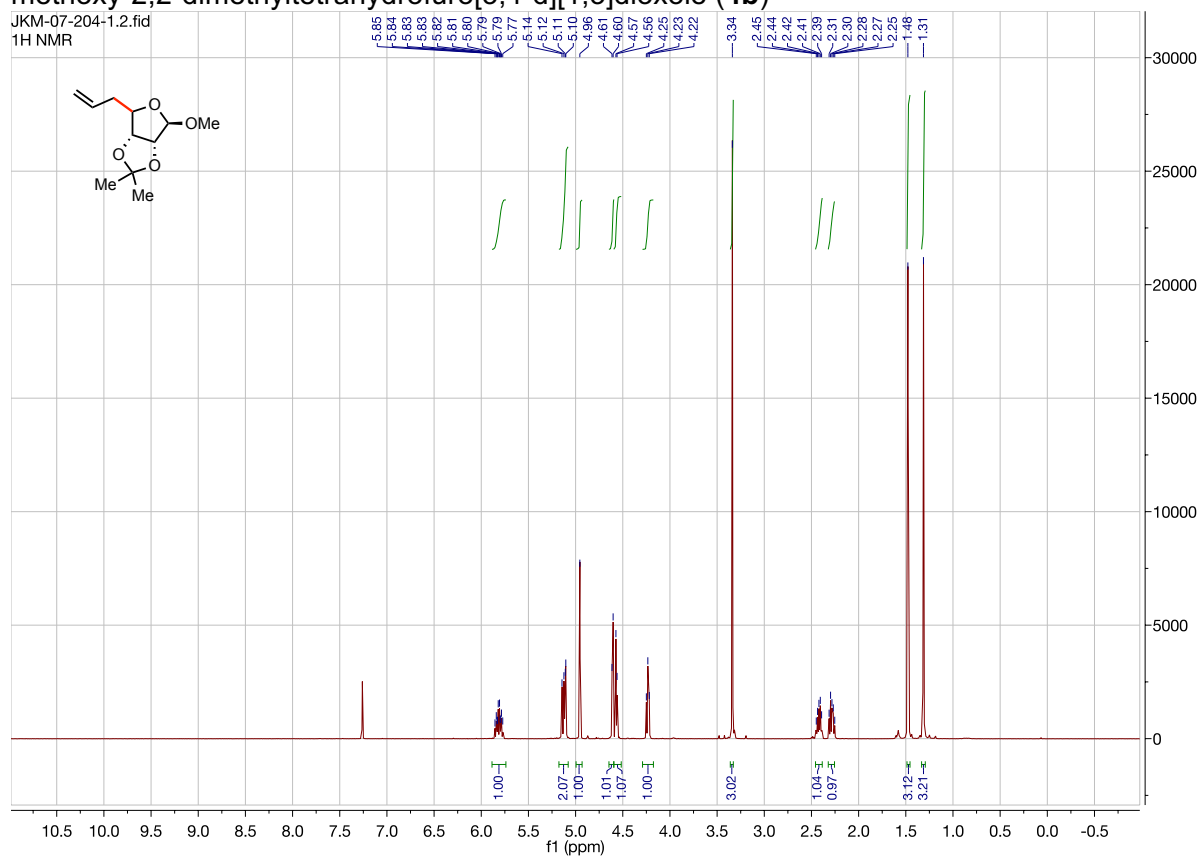

JKM-07-204-1\_13C.2.fid  
13C NMR

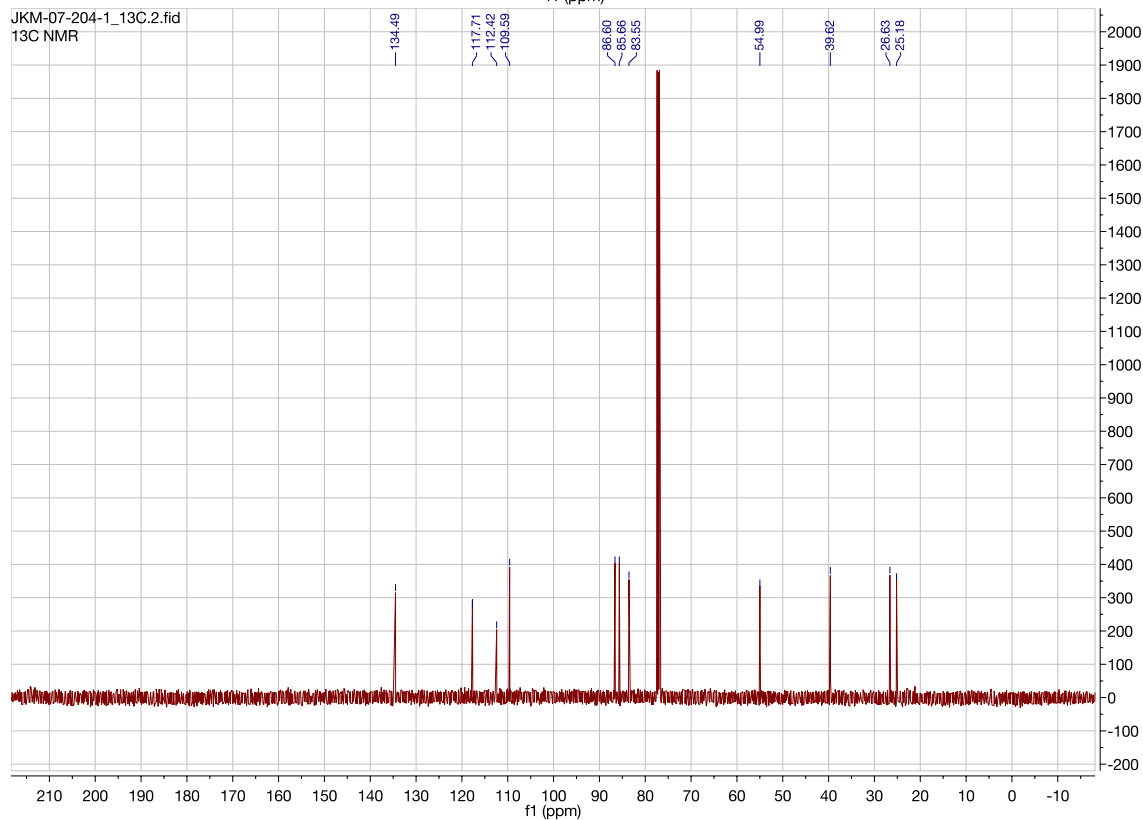

<sup>1</sup>H NMR (CDCl<sub>3</sub>, 500 MHz) and <sup>13</sup>C NMR (CDCl<sub>3</sub>, 126 MHz) of (3*a*R,4*R*,6*R*,6*a*R)-4-(3,3-difluoroallyl)-6-methoxy-2,2-dimethyltetrahydrofuro[3,4-*d*][1,3]dioxole (**4c**)

JKM-07-258-1.1.fid  
1H NMR

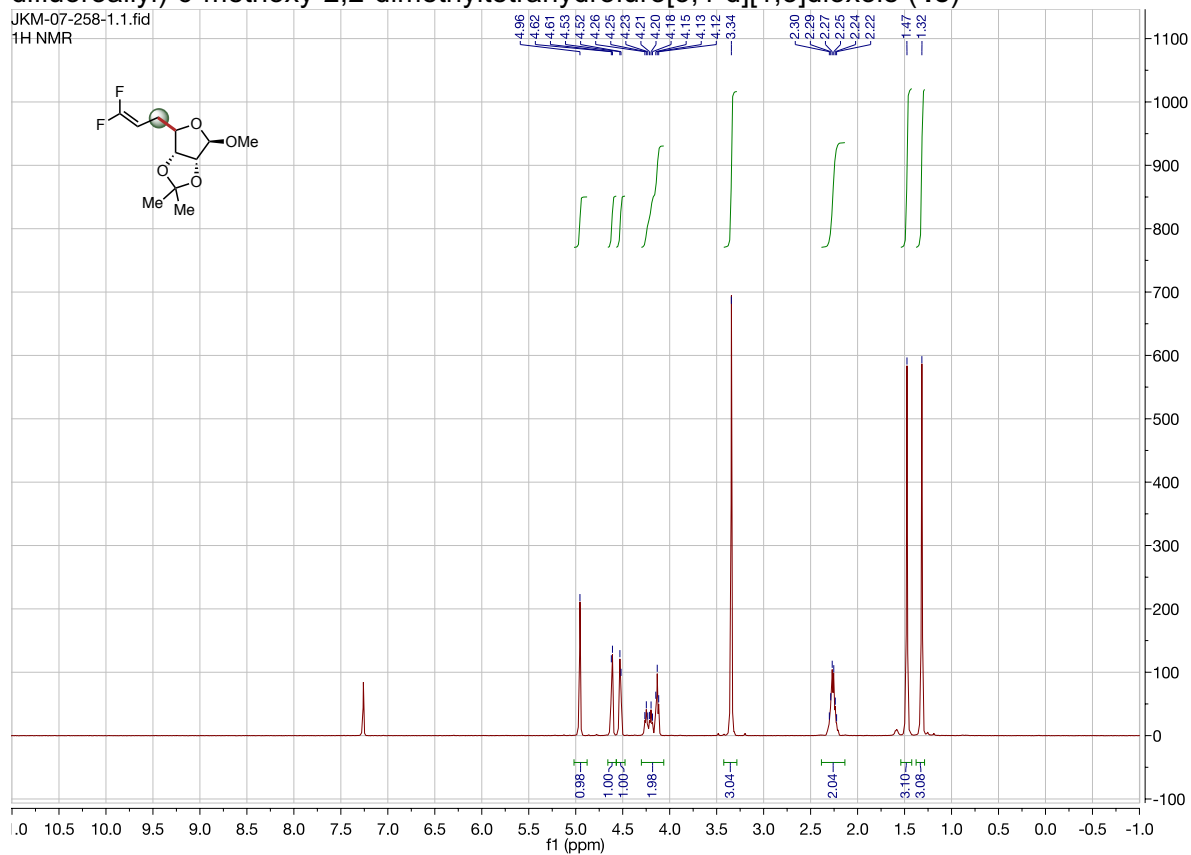

JKM\_7\_258\_CDCl3\_13C\_Cryoprobe.1  
JKM\_7\_258\_CDCl3\_13C\_Cryoprobe

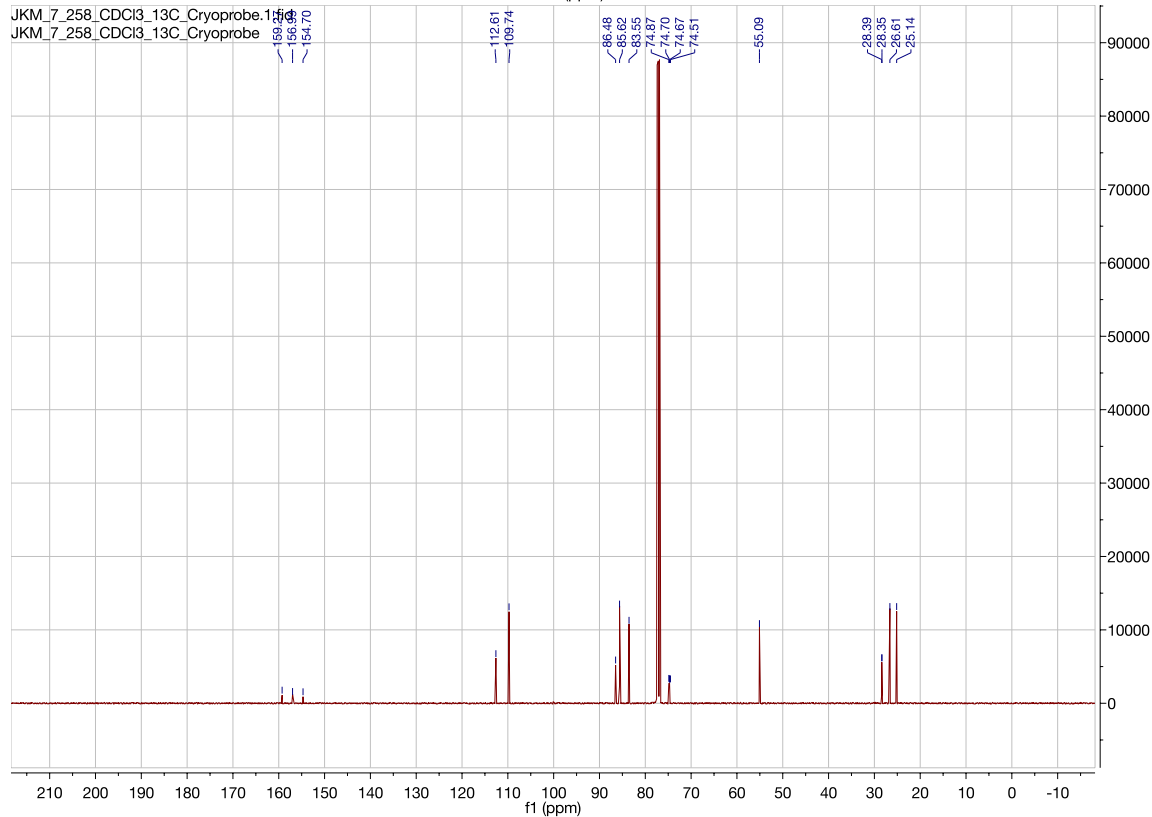

<sup>19</sup>F NMR (CDCl<sub>3</sub>, 471 MHz) of (3a*R*,4*R*,6*R*,6a*R*)-4-(3,3-difluoroallyl)-6-methoxy-2,2-dimethyltetrahydrofuro[3,4-d][1,3]dioxole (**4d**)

JKM-07-258-1\_19F1.fid  
F19 NMR

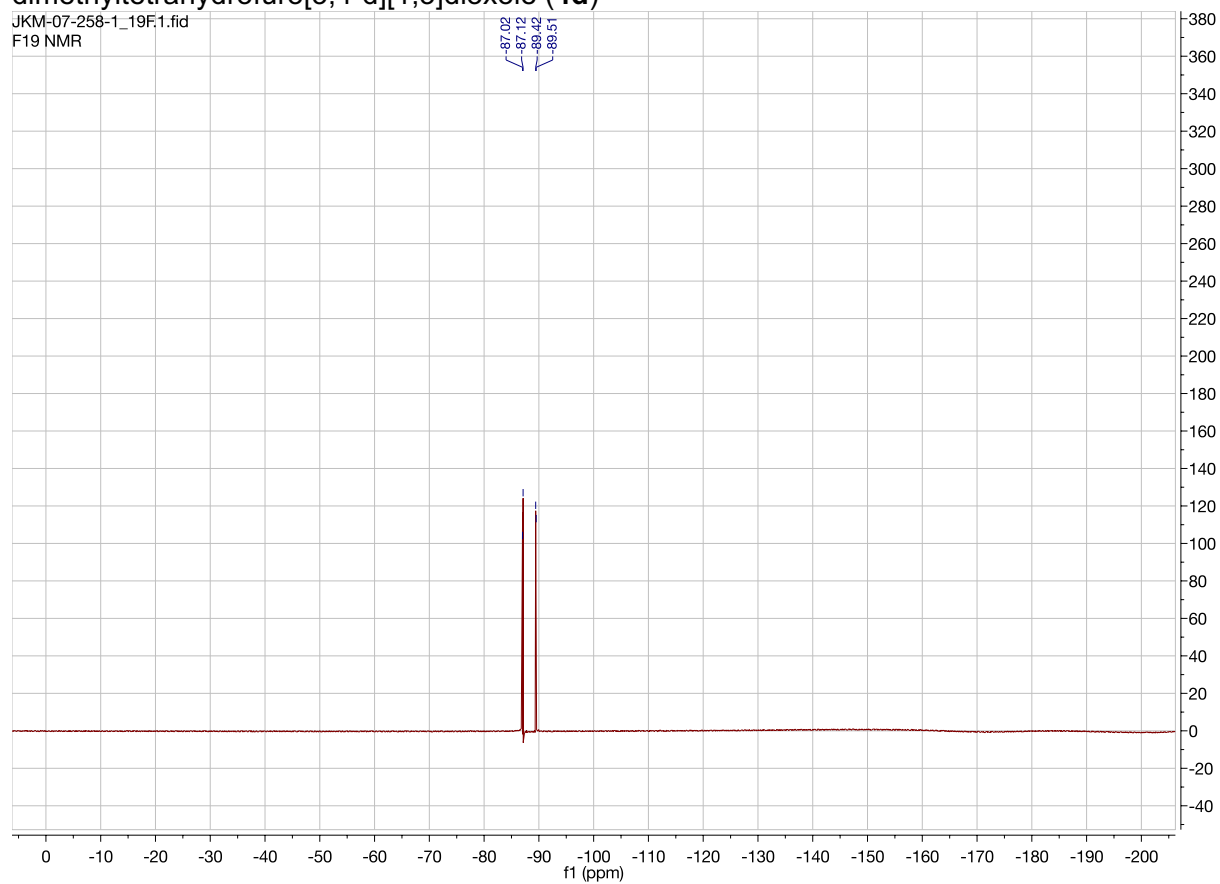

<sup>1</sup>H NMR (CDCl<sub>3</sub>, 500 MHz) and <sup>13</sup>C NMR (CDCl<sub>3</sub>, 126 MHz) of 5-(4-methoxyphenyl)-1-phenylpent-2-en-1-ol (**5a**)

RA71002 re F3.1.fid  
1H NMR

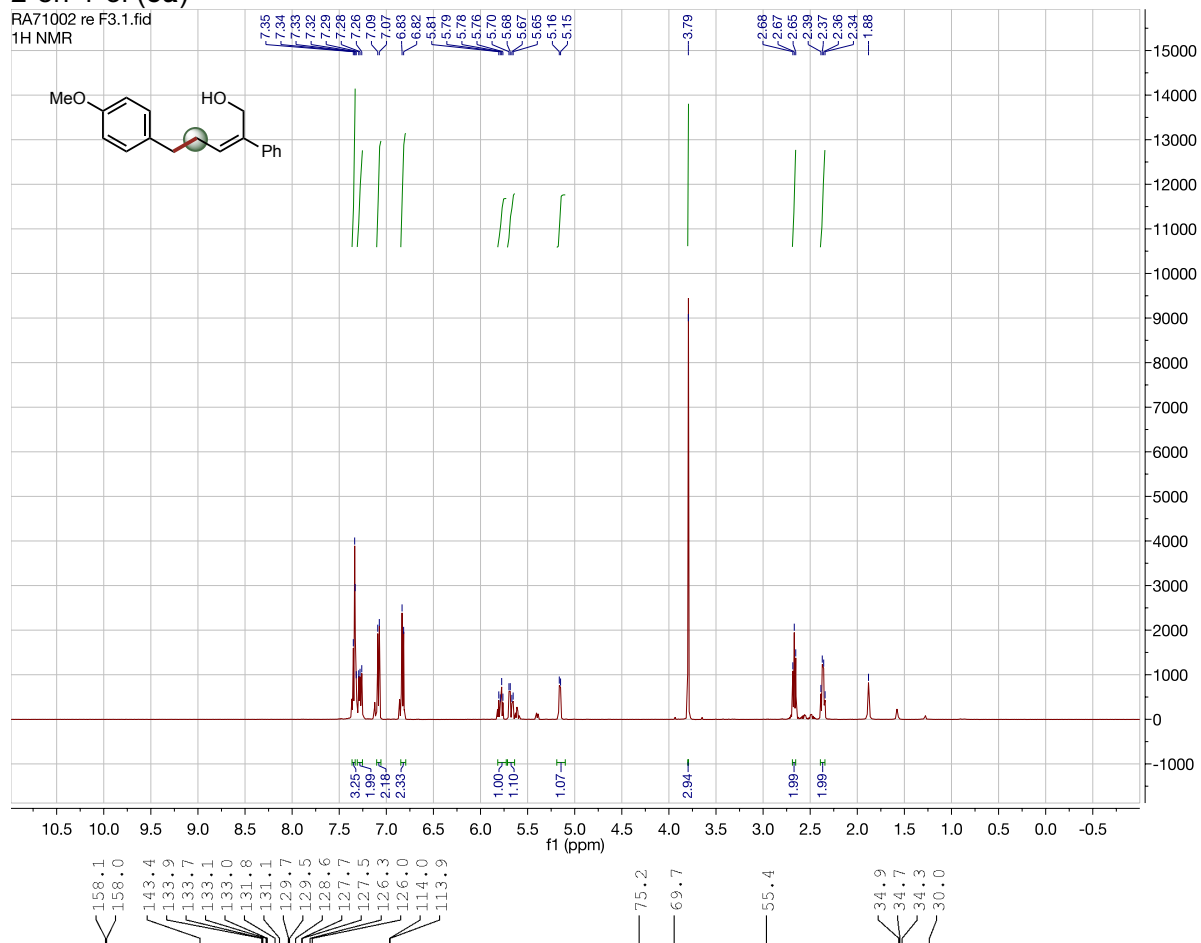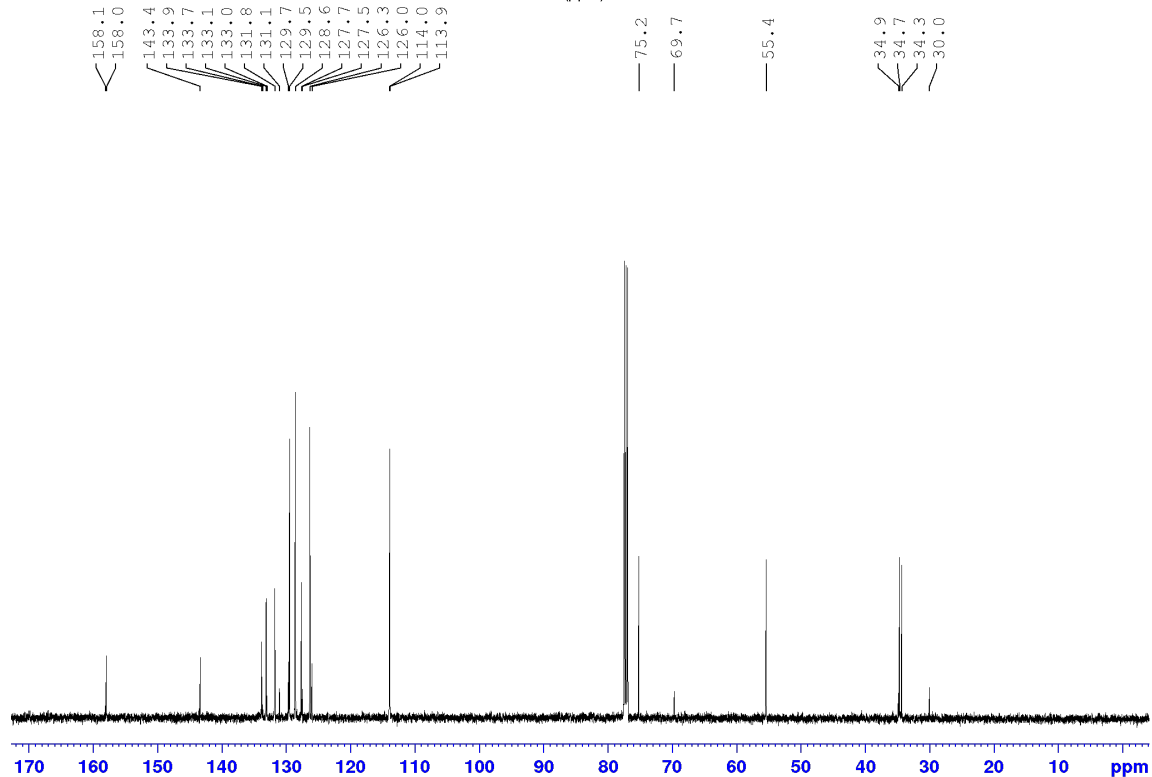

Supplement: NIHMS1027902-supplement-Supporting_Information.pdf [file NIHMS1027902-supplement-Supporting_Information.pdf]
